# Supplementary material for: AERO-MAP: a data compilation and modeling approach to understand spatial variability in fine- and coarse-mode aerosol composition
Source: Copernicus journal article supplement (doi:10.5194/acp-25-4665-2025), 2025-05-06
Supplement: Supplementary file 2 [file acp-25-4665-2025-supplement.zip]

Aas, W., CAMP, EMEP, NILU, 2011, PM mass at Birkenes II, data hosted by EBAS at NILU, Part of DOI: <https://doi.org/10.48597/X4BA-N9XD>

Aas, W., CAMP, EMEP, NILU, 2014, PM mass at Birkenes II, data hosted by EBAS at NILU, Part of DOI: <https://doi.org/10.48597/X4BA-N9XD>

Aas, W., CAMP, EMEP, NILU, 2015, PM mass at Birkenes, data hosted by EBAS at NILU, Part of DOI: <https://doi.org/10.48597/C8HZ-SJEZ>, <https://doi.org/10.48597/4YME-U3J3>

Aas, W., CAMP, EMEP, NILU, 2020, Aluminium at Birkenes II, data hosted by EBAS at NILU, Part of DOI: <https://doi.org/10.48597/E6UY-KDCC>

Aas, W., CAMP, EMEP, NILU, 2020, Aluminium at Birkenes II, data hosted by EBAS at NILU, Part of DOI: <https://doi.org/10.48597/SQMS-BSPS>

Aas, W., CAMP, EMEP, NILU, 2023, Aluminium at Birkenes II, data hosted by EBAS at NILU, Part of DOI: <https://doi.org/10.48597/RM7S-VQKA>

Aas, W., EMEP, GAW-WDCA, NILU, 2023, Pm10\_mass at Birkenes II, data hosted by EBAS at NILU, Part of DOI: <https://doi.org/10.48597/U9J8-GYD8>

Aas, W., EMEP, NILU, 2023, PM mass at Birkenes II, data hosted by EBAS at NILU, Part of DOI: <https://doi.org/10.48597/PPSZ-C9Y7>

Aas, W., EMEP, NILU, 2023, PM mass at Hurdal, data hosted by EBAS at NILU, Part of DOI: <https://doi.org/10.48597/HKDP-BBXH>

Aas, W., EMEP, NILU, 2023, PM mass at Kårvatn, data hosted by EBAS at NILU, Part of DOI: <https://doi.org/10.48597/HTVP-5GFG>

Aas, W., EMEP, NILU, 2023, Pm10\_mass at Birkenes II, data hosted by EBAS at NILU, Part of DOI: <https://doi.org/10.48597/JJMZ-UABF>

Aas, W., EMEP, NILU, 2023, Pm10\_mass at Hurdal, data hosted by EBAS at NILU, Part of DOI: <https://doi.org/10.48597/J5VG-9V8Y>

Aas, W., EMEP, NILU, 2023, Pm10\_mass at Kårvatn, data hosted by EBAS at NILU, Part of DOI: <https://doi.org/10.48597/HU2F-VE6B>

Aas, W., EMEP, NILU, 2023, Pm25\_mass at Birkenes II, data hosted by EBAS at NILU, Part of DOI: <https://doi.org/10.48597/FKCH-F2JT>

Aas, W., EMEP, NILU, 2023, Pm25\_mass at Birkenes II, data hosted by EBAS at NILU, Part of DOI: <https://doi.org/10.48597/V823-X8MM>

Aas, W., EMEP, NILU, 2023, Pm25\_mass at Hurdal, data hosted by EBAS at NILU, Part of DOI: <https://doi.org/10.48597/VAHV-HD27>

Aas, W., EMEP, NILU, 2023, Pm25\_mass at Kårvatn, data hosted by EBAS at NILU, Part of DOI: <https://doi.org/10.48597/F8XS-WZNJ>

Aas, W., NILU, 2010, Pm10\_mass at Troll, data hosted by EBAS at NILU, Part of DOI: <https://doi.org/10.48597/Q26T-74WD>

Aas, W., NILU, 2021, Aluminium at Svanvik, data hosted by EBAS at NILU, Part of DOI: <https://doi.org/10.48597/JTQ5-Q3WG>

Aas, W., NILU, 2022, Aluminium at Karpdalen, data hosted by EBAS at NILU, Part of DOI: <https://doi.org/10.48597/25WT-KEFN>

Aas, W., NILU, 2022, Aluminium at Karpdalen, data hosted by EBAS at NILU, Part of DOI: <https://doi.org/10.48597/4R2Y-ANBE>

Aas, W., NILU, 2022, Aluminium at Svanvik, data hosted by EBAS at NILU, Part of DOI: <https://doi.org/10.48597/FMU5-QYZR>

Aas, W., NILU, 2023, Aluminium at Svanvik, data hosted by EBAS at NILU, Part of DOI: <https://doi.org/10.48597/JTQ5-Q3WG>

Aas, W., Vadset, M., NILU, 2023, Aluminium at Sofienbergparken, data hosted by EBAS at NILU, Part of DOI: <https://doi.org/10.48597/PUVC-36NX>

Adamides, A., EMEP, 2016, OC/EC and inorganics in air and particle phase at Agia Marina Xyliatou / Cyprus Atmospheric Observatory, data hosted by EBAS at NILU, Part of DOI: <https://doi.org/10.48597/87AY-VFWR>

Adamides, A., EMEP, 2018, Aluminium and pm10\_mass at Agia Marina Xyliatou / Cyprus Atmospheric Observatory, data hosted by EBAS at NILU, Part of DOI: <https://doi.org/10.48597/DWN4-T22K>, <https://doi.org/10.48597/HVSC-5TJP>

Adamopoulos, A., EMEP, 2013, Pm10\_mass at Aliartos, data hosted by EBAS at NILU, Part of DOI: <https://doi.org/10.48597/6A4B-XTKN>

Adamopoulos, A., EMEP, 2018, PM mass at Aliartos, data hosted by EBAS at NILU, Part of DOI: <https://doi.org/10.48597/HNPZ-A9F9>

Adamopoulos, A., EMEP, 2019, PM mass at Aliartos, data hosted by EBAS at NILU, Part of DOI: <https://doi.org/10.48597/S4SM-Y35K>, <https://doi.org/10.48597/JH4Y-RDE2>

Adamopoulos, A., EMEP, 2020, PM mass at Aliartos, data hosted by EBAS at NILU, Part of DOI: <https://doi.org/10.48597/B245-R2V8>

Adamopoulos, A., EMEP, 2021, PM mass at Aliartos, data hosted by EBAS at NILU, Part of DOI: <https://doi.org/10.48597/S4SM-Y35K>, <https://doi.org/10.48597/JH4Y-RDE2>

Adamopoulos, A., EMEP, 2022, PM mass at Aliartos, data hosted by EBAS at NILU, Part of DOI: <https://doi.org/10.48597/S4SM-Y35K>, <https://doi.org/10.48597/JH4Y-RDE2>

Adamopoulos, A., EMEP, 2023, PM mass at Aliartos, data hosted by EBAS at NILU, Part of DOI: <https://doi.org/10.48597/B245-R2V8>

Adela, H., Silhavy, J., Cech, J., EMEP, 2020, Pm10\_mass at Kosetice (NAOK), data hosted by EBAS at NILU, Part of DOI: <https://doi.org/10.48597/UDAA-HGWN>

Adela, H., Silhavy, J., Cech, J., EMEP, 2020, Pm25\_mass at Kosetice (NAOK), data hosted by EBAS at NILU, Part of DOI: <https://doi.org/10.48597/AYCF-T2XC>

Alados-Arboledas, L., Titos, G., ACTRIS, CAMPAIGN, COLOSSAL, GAW-WDCA, NOAA-ESRL, 2018, OC/EC at Granada, data hosted by EBAS at NILU, Part of DOI: <https://doi.org/10.48597/257R-DXCZ>

Alasteuy, A., Areskoug, H., CAMPAIGN, EMEP, 2016, Aluminium and inorganics in air and particle phase at Aspvreten, data hosted by EBAS at NILU, Part of DOI: <https://doi.org/10.48597/58V2-D24Y>

Alasteuy, A., Balan, V., CAMPAIGN, EMEP, 2016, Aluminium and inorganics in air and particle phase at Leova II, data hosted by EBAS at NILU, Part of DOI: <https://doi.org/10.48597/6ZT9-3TYT>

Alasteuy, A., CAMPAIGN, EMEP, 2016, Aluminium and inorganics in air and particle phase at Montsec, data hosted by EBAS at NILU, Part of DOI: <https://doi.org/10.48597/SC76-NFZ5>

Alasteuy, A., CAMPAIGN, EMEP, 2016, Aluminium and inorganics in air and particle phase at Montseny, data hosted by EBAS at NILU, Part of DOI: <https://doi.org/10.48597/34XW-TB8M>

Alasteuy, A., Catrambone, M., CAMPAIGN, EMEP, 2016, Aluminium and inorganics in air and particle phase at Montelibretti, data hosted by EBAS at NILU, Part of DOI: <https://doi.org/10.48597/ZWWZ-8SRH>

Alasteuy, A., Cavalli, F., Putaud, J., CAMPAIGN, EMEP, 2016, Aluminium and inorganics in air and particle phase at Ispra, data hosted by EBAS at NILU, Part of DOI: <https://doi.org/10.48597/GDE3-STEG>

Alasteuy, A., Ceburnis, D., O'Dowd, C., CAMPAIGN, EMEP, 2016, Aluminium and inorganics in air and particle phase at Mace Head, data hosted by EBAS at NILU, Part of DOI: <https://doi.org/10.48597/Y252-B3Q5>

Alasteuy, A., Cerro, J., CAMPAIGN, EMEP, 2016, Aluminium and inorganics in air and particle phase at Can Llompart, data hosted by EBAS at NILU, Part of DOI: <https://doi.org/10.48597/VXZR-Y654>

Alasteuy, A., Conil, S., CAMPAIGN, EMEP, 2016, Aluminium and inorganics in air and particle phase at Observatoire Perenne de l'Environnement, data hosted by EBAS at NILU, Part of DOI: <https://doi.org/10.48597/XUMC-PA8H>

Alasteuy, A., Gevorgyan, L., CAMPAIGN, EMEP, 2016, Aluminium and inorganics in air and particle phase at Amberd, data hosted by EBAS at NILU, Part of DOI: <https://doi.org/10.48597/45CD-EF6J>

Alasteuy, A., Hueglin, C., CAMPAIGN, EMEP, 2016, Aluminium and inorganics in air and particle phase at Payerne, data hosted by EBAS at NILU, Part of DOI: <https://doi.org/10.48597/5HJC-TDEA>

Alasteuy, A., Imre, K., CAMPAIGN, EMEP, 2016, Aluminium and inorganics in air and particle phase at K-puszt, data hosted by EBAS at NILU, Part of DOI: <https://doi.org/10.48597/TFMD-DSKU>

Alasteuy, A., Jaffrezo, J., CAMPAIGN, EMEP, 2016, Aluminium and inorganics in air and particle phase at SIRT Atmospheric Research Observatory, data hosted by EBAS at NILU, Part of DOI: <https://doi.org/10.48597/FUE7-2728>

Alasteuy, A., Leeson, S., CAMPAIGN, EMEP, 2016, Aluminium and inorganics in air and particle phase at Auchencorth Moss, data hosted by EBAS at NILU, Part of DOI: <https://doi.org/10.48597/8SW3-F363>

Alasteuy, A., Leeson, S., CAMPAIGN, EMEP, 2016, Aluminium and inorganics in air and particle phase at Harwell, data hosted by EBAS at NILU, Part of DOI: <https://doi.org/10.48597/8NY5-2894>

Alasteuy, A., Mihalopoulos, N., CAMPAIGN, EMEP, 2016, Aluminium and inorganics in air and particle phase at Finokalia, data hosted by EBAS at NILU, Part of DOI: <https://doi.org/10.48597/U6QZ-3JHV>

Alasteuy, A., Mitosinkova, M., CAMPAIGN, EMEP, 2016, Aluminium and inorganics in air and particle phase at Starina, data hosted by EBAS at NILU, Part of DOI: <https://doi.org/10.48597/FDZ7-A6P9>

Alasteuy, A., Riffault, V., CAMPAIGN, EMEP, 2016, Aluminium and inorganics in air and particle phase at Revin, data hosted by EBAS at NILU, Part of DOI: <https://doi.org/10.48597/JC4A-D3ZS>

Alasteuy, A., Sellegri, K., CAMPAIGN, EMEP, 2016, Aluminium and inorganics in air and particle phase at Puy de Dôme, data hosted by EBAS at NILU, Part of DOI: <https://doi.org/10.48597/NEFF-FCSM>

Alasteuy, A., Spindler, G., CAMPAIGN, EMEP, 2016, Aluminium and inorganics in air and particle phase at Melpitz, data hosted by EBAS at NILU, Part of DOI: <https://doi.org/10.48597/SMP4-5YKT>

Alastuey, A., CAMPAIGN, EMEP, 2010, Aluminium at Montseny, data hosted by EBAS at NILU, Part of DOI: <https://doi.org/10.48597/2M74-SR87>

Alastuey, A., CAMPAIGN, EMEP, 2010, Aluminium at Montseny, data hosted by EBAS at NILU, Part of DOI: <https://doi.org/10.48597/NYDQ-JH6X>

Alastuey, A., EMEP, 2010, Aluminium at Montseny, data hosted by EBAS at NILU, Part of DOI: <https://doi.org/10.48597/GEE9-X8KR>

Alastuey, A., EMEP, 2010, Aluminium at Montseny, data hosted by EBAS at NILU, Part of DOI: <https://doi.org/10.48597/SJ6Z-QBQK>

Alastuey, A., EMEP, 2010, OC/EC and inorganics in air and particle phase at Montseny, data hosted by EBAS at NILU, Part of DOI: <https://doi.org/10.48597/CB68-KCN3>

Alastuey, A., EMEP, 2010, OC/EC and inorganics in air and particle phase at Montseny, data hosted by EBAS at NILU, Part of DOI: <https://doi.org/10.48597/U9NW-GAXV>

Alastuey, A., EMEP, 2014, Aluminium and sulphate\_corrected at Montseny, data hosted by EBAS at NILU, Part of DOI: <https://doi.org/10.48597/6QHC-4RJC>

Alastuey, A., EMEP, 2014, Aluminium and sulphate\_corrected at Montseny, data hosted by EBAS at NILU, Part of DOI: <https://doi.org/10.48597/VZR6-7Q45>

Alastuey, A., EMEP, 2014, Inorganics in air and particle phase at Montseny, data hosted by EBAS at NILU, Part of DOI: <https://doi.org/10.48597/HV5A-AWC4>

Alastuey, A., EMEP, 2014, Inorganics in air and particle phase at Montseny, data hosted by EBAS at NILU, Part of DOI: <https://doi.org/10.48597/KUZD-FJED>

Alastuey, A., Perez, N., ACTRIS, CAMPAIGN, COLOSSAL, EMEP, 2018, OC/EC at Barcelona (Palau Reial), data hosted by EBAS at NILU, Part of DOI: <https://doi.org/10.48597/U9KB-7H8R>

Alastuey, A., Perez, N., ACTRIS, CAMPAIGN, COLOSSAL, EMEP, 2018, OC/EC at Barcelona (Palau Reial), data hosted by EBAS at NILU, Part of DOI: <https://doi.org/10.48597/ZN8N-W4JF>

Alastuey, A., Perez, N., ACTRIS, EMEP, GAW-WDCA, 2018, OC/EC at Montseny, data hosted by EBAS at NILU, Part of DOI: <https://doi.org/10.48597/AWBN-GV54>

Alastuey, A., Perez, N., ACTRIS, EMEP, GAW-WDCA, 2018, OC/EC at Montseny, data hosted by EBAS at NILU, Part of DOI: <https://doi.org/10.48597/VJAT-QQ8W>

Alastuey, A., Perez, N., ACTRIS, EMEP, GAW-WDCA, 2020, OC/EC at Montsec, data hosted by EBAS at NILU, Part of DOI: <https://doi.org/10.48597/74YB-GWX6>

Alastuey, A., Perez, N., ACTRIS, EMEP, GAW-WDCA, 2020, OC/EC at Montseny, data hosted by EBAS at NILU, Part of DOI: <https://doi.org/10.48597/AWBN-GV54>

Alastuey, A., Perez, N., ACTRIS, EMEP, GAW-WDCA, 2020, OC/EC at Montseny, data hosted by EBAS at NILU, Part of DOI: <https://doi.org/10.48597/VJAT-QQ8W>

Alastuey, A., Perez, N., ACTRIS, EMEP, GAW-WDCA, 2021, OC/EC at Montsec, data hosted by EBAS at NILU, Part of DOI: <https://doi.org/10.48597/74YB-GWX6>

Alastuey, A., Perez, N., ACTRIS, EMEP, GAW-WDCA, 2021, OC/EC at Montseny, data hosted by EBAS at NILU, Part of DOI: <https://doi.org/10.48597/AWBN-GV54>

Alastuey, A., Perez, N., ACTRIS, EMEP, GAW-WDCA, 2021, OC/EC at Montseny, data hosted by EBAS at NILU, Part of DOI: <https://doi.org/10.48597/VJAT-QQ8W>

Alastuey, A., Perez, N., ACTRIS, EMEP, GAW-WDCA, 2022, OC/EC at Montsec, data hosted by EBAS at NILU, Part of DOI: <https://doi.org/10.48597/74YB-GWX6>

Alastuey, A., Perez, N., ACTRIS, EMEP, GAW-WDCA, 2023, OC/EC at Montseny, data hosted by EBAS at NILU, Part of DOI: <https://doi.org/10.48597/GR38-TKZM>

Alastuey, A., Perez, N., ACTRIS, EMEP, GAW-WDCA, 2023, OC/EC at Montseny, data hosted by EBAS at NILU, Part of DOI: <https://doi.org/10.48597/JMVU-WSUF>

Alastuey, A., Perez, N., ACTRIS, RI-URBANS, 2023, OC/EC at Barcelona (Palau Reial), data hosted by EBAS at NILU, Part of DOI: <https://doi.org/10.48597/2YQB-6A7F>

Alastuey, A., Perez, N., ACTRIS, RI-URBANS, 2023, OC/EC at Barcelona (Palau Reial), data hosted by EBAS at NILU, Part of DOI: <https://doi.org/10.48597/FUD7-D4FP>

Alastuey, A., Perez, N., EMEP, EUSAAR, GAW-WDCA, 2011, Organic\_carbon at Montseny, data hosted by EBAS at NILU, Part of DOI: <https://doi.org/10.48597/PFWV-2V7Z>

Alastuey, A., Querol, X., EUSAAR, GAW-WDCA, 2010, PM mass at Montseny, data hosted by EBAS at NILU, Part of DOI: <https://doi.org/10.48597/35YJ-AHJ3>

Alastuey, A., Querol, X., EUSAAR, GAW-WDCA, 2010, Pm25\_mass at Montseny, data hosted by EBAS at NILU, Part of DOI: <https://doi.org/10.48597/47P9-6P42>

Alczar, I., EMEP, GAW-WDCA, 2012, Pm10\_mass at Mahón, data hosted by EBAS at NILU, Part of DOI: <https://doi.org/10.48597/SHVW-7QJD>

Alczar, I., EMEP, GAW-WDCA, 2012, Pm10\_mass at Noia, data hosted by EBAS at NILU, Part of DOI: <https://doi.org/10.48597/BYQY-M4U7>

Angelucci, M., EMEP, 2019, Aluminium at Monte Martano, data hosted by EBAS at NILU, Part of DOI: <https://doi.org/10.48597/GYHN-3U45>

Angelucci, M., EMEP, 2020, Aluminium at Monte Martano, data hosted by EBAS at NILU, Part of DOI: <https://doi.org/10.48597/GYHN-3U45>

Angelucci, M., EMEP, 2021, Aluminium at Monte Martano, data hosted by EBAS at NILU, Part of DOI: <https://doi.org/10.48597/GYHN-3U45>

Angelucci, M., EMEP, 2023, Ammonium at Monte Martano, data hosted by EBAS at NILU, Part of DOI: <https://doi.org/10.48597/NPS5-YQ6Q>

Angelucci, M., EMEP, 2023, Inorganics in air and particle phase at Monte Martano, data hosted by EBAS at NILU, Part of DOI: <https://doi.org/10.48597/XBJW-CPMS>, <https://doi.org/10.48597/2EU8-VV52>

Angelucci, M., EMEP, 2023, Nitrate at Monte Martano, data hosted by EBAS at NILU, Part of DOI: <https://doi.org/10.48597/QZBG-PBXP>

Angelucci, M., EMEP, 2023, Pm10\_mass at Monte Martano, data hosted by EBAS at NILU, Part of DOI: <https://doi.org/10.48597/QZG9-THDB>

Angelucci, M., EMEP, 2023, Pm25\_mass at Monte Martano, data hosted by EBAS at NILU, Part of DOI: <https://doi.org/10.48597/K8ZX-WENG>

Angelucci, M., EMEP, 2023, Sodium at Monte Martano, data hosted by EBAS at NILU, Part of DOI: <https://doi.org/10.48597/3KDJ-4VSX>

Antti, H., EUCAARI, GAW-WDCA, 2010, PM mass at Gual Pahari, data hosted by EBAS at NILU, Part of DOI: <https://doi.org/10.48597/DEE2-D9SQ>

Antti, H., EUCAARI, GAW-WDCA, 2024, PM mass at Gual Pahari, data hosted by EBAS at NILU, Part of DOI: <https://doi.org/10.48597/DEE2-D9SQ>

Atanasov, I., EMEP, 2010, Pm10\_mass at Lazaropole, data hosted by EBAS at NILU, Part of DOI: <https://doi.org/10.48597/GJTW-RPEF>

Atanasov, I., EMEP, 2014, Pm10\_mass at Lazaropole, data hosted by EBAS at NILU, Part of DOI: <https://doi.org/10.48597/GJTW-RPEF>

Atanasov, I., EMEP, 2015, Pm10\_mass at Lazaropole, data hosted by EBAS at NILU, Part of DOI: <https://doi.org/10.48597/QVQM-FD47>

Atanasov, I., EMEP, 2016, Pm10\_mass at Lazaropole, data hosted by EBAS at NILU, Part of DOI: <https://doi.org/10.48597/QVQM-FD47>

Atanasov, I., EMEP, 2017, Pm10\_mass at Lazaropole, data hosted by EBAS at NILU, Part of DOI: <https://doi.org/10.48597/QVQM-FD47>

Atanasov, I., EMEP, 2018, Pm10\_mass at Lazaropole, data hosted by EBAS at NILU, Part of DOI: <https://doi.org/10.48597/QVQM-FD47>

Atanasov, I., EMEP, 2019, Pm10\_mass at Lazaropole, data hosted by EBAS at NILU, Part of DOI: <https://doi.org/10.48597/QVQM-FD47>

Atanasov, I., EMEP, 2020, Pm10\_mass at Lazaropole, data hosted by EBAS at NILU, Part of DOI: <https://doi.org/10.48597/QVQM-FD47>

Aurela, M., ACTRIS, CAMPAIGN, COLOSSAL, EMEP, GAW-WDCA, 2018, OC/EC at Pallas (Matorova), data hosted by EBAS at NILU, Part of DOI: <https://doi.org/10.48597/CTJQ-83BT>

Aurela, M., CAMPAIGN, EMEP, 2004, OC/EC and pm10\_mass at Virolahti II, data hosted by EBAS at NILU, Part of DOI: <https://doi.org/10.48597/HY6Q-CU7D>

Balan, V., EMEP, 2012, Pm10\_mass at Leova II, data hosted by EBAS at NILU, Part of DOI: <https://doi.org/10.48597/C5HP-ZST2>

Balan, V., EMEP, 2012, Pm10\_mass at Leova II, data hosted by EBAS at NILU, Part of DOI: <https://doi.org/10.48597/H7HD-BDRM>

Balan, V., EMEP, 2012, Pm10\_mass at Leova II, data hosted by EBAS at NILU, Part of DOI: <https://doi.org/10.48597/MJHN-GEY2>

Balan, V., EMEP, 2013, Pm10\_mass at Leova II, data hosted by EBAS at NILU, Part of DOI: <https://doi.org/10.48597/MJHN-GEY2>

Balan, V., EMEP, 2015, Pm10\_mass at Leova II, data hosted by EBAS at NILU, Part of DOI: <https://doi.org/10.48597/MJHN-GEY2>

Balan, V., EMEP, 2016, Pm10\_mass at Leova II, data hosted by EBAS at NILU, Part of DOI: <https://doi.org/10.48597/MJHN-GEY2>

Bartolome, M., CAMP, EMEP, 2014, Ammonium at Niembro, data hosted by EBAS at NILU, Part of DOI: <https://doi.org/10.48597/TH6Q-Y9RR>

Bartolome, M., CAMP, EMEP, 2014, Pm25\_mass at Niembro, data hosted by EBAS at NILU, Part of DOI: <https://doi.org/10.48597/GNTJ-CEEH>

Bartolome, M., CAMP, EMEP, 2015, Inorganics in air and particle phase at Niembro, data hosted by EBAS at NILU, Part of DOI: <https://doi.org/10.48597/KAND-TCRG>, <https://doi.org/10.48597/455K-K35V>, <https://doi.org/10.48597/7FWV-AT6J>, <https://doi.org/10.48597/PPSK-XJJY>, <https://doi.org/10.48597/T98A-K3HK>

Bartolome, M., CAMP, EMEP, 2015, Inorganics in air and particle phase at Niembro, data hosted by EBAS at NILU, Part of DOI: <https://doi.org/10.48597/V8HE-D6HB>, <https://doi.org/10.48597/PBR3-6MX5>, <https://doi.org/10.48597/8GVX-NBJ5>, <https://doi.org/10.48597/NB9N-6UNR>, <https://doi.org/10.48597/QZSY-HP2K>

Bartolome, M., CAMP, EMEP, 2018, Inorganics in air and particle phase at Doñana, data hosted by EBAS at NILU, Part of DOI: <https://doi.org/10.48597/96E8-8MEX>, <https://doi.org/10.48597/KN5C-ZRQ9>, <https://doi.org/10.48597/FFSN-Y9D9>

Bartolome, M., CAMP, EMEP, 2018, Inorganics in air and particle phase at Niembro, data hosted by EBAS at NILU, Part of DOI: <https://doi.org/10.48597/KAND-TCRG>, <https://doi.org/10.48597/455K-K35V>, <https://doi.org/10.48597/7FWV-AT6J>, <https://doi.org/10.48597/PPSK-XJJY>, <https://doi.org/10.48597/T98A-K3HK>

Bartolome, M., CAMP, EMEP, 2018, Inorganics in air and particle phase at Niembro, data hosted by EBAS at NILU, Part of DOI: <https://doi.org/10.48597/NJTP-MJWW>, <https://doi.org/10.48597/FCV7-FGQ7>, <https://doi.org/10.48597/68T3-EXSF>

Bartolome, M., CAMP, EMEP, 2018, Inorganics in air and particle phase at Noia, data hosted by EBAS at NILU, Part of DOI: <https://doi.org/10.48597/GWYP-6GFV>, <https://doi.org/10.48597/DHGS-A3UP>, <https://doi.org/10.48597/B242-H84H>

Bartolome, M., CAMP, EMEP, 2018, Pm25\_mass at Niembro, data hosted by EBAS at NILU, Part of DOI: <https://doi.org/10.48597/GNTJ-CEEH>

Bartolome, M., EMEP, 2016, OC/EC at San Pablo de los Montes, data hosted by EBAS at NILU, Part of DOI: <https://doi.org/10.48597/EU4X-HE29>

Bartolome, M., EMEP, 2018, Ammonium at Campisabalos, data hosted by EBAS at NILU, Part of DOI: <https://doi.org/10.48597/U3XV-GU5B>

Bartolome, M., EMEP, 2018, Ammonium at Els Torms, data hosted by EBAS at NILU, Part of DOI: <https://doi.org/10.48597/BXNN-JBJD>

Bartolome, M., EMEP, 2018, Ammonium at San Pablo de los Montes, data hosted by EBAS at NILU, Part of DOI: <https://doi.org/10.48597/BCPF-G9T4>

Bartolome, M., EMEP, 2018, Ammonium at Víznar, data hosted by EBAS at NILU, Part of DOI: <https://doi.org/10.48597/YMQ5-FH3K>

Bartolome, M., EMEP, 2018, Inorganics in air and particle phase at Barcarrota, data hosted by EBAS at NILU, Part of DOI: <https://doi.org/10.48597/7UV3-PDJS>, <https://doi.org/10.48597/H6RE-QJCB>, <https://doi.org/10.48597/Y8HZ-G9RS>

Bartolome, M., EMEP, 2018, Inorganics in air and particle phase at Cabo de Creus, data hosted by EBAS at NILU, Part of DOI: <https://doi.org/10.48597/WK3P-W5BY>, <https://doi.org/10.48597/RH38-RN4E>, <https://doi.org/10.48597/NKZB-QC7X>

Bartolome, M., EMEP, 2018, Inorganics in air and particle phase at Campisabalos, data hosted by EBAS at NILU, Part of DOI: <https://doi.org/10.48597/4BKP-7W9F>, <https://doi.org/10.48597/EGUK-U2KK>, <https://doi.org/10.48597/Y8Z3-XP3G>, <https://doi.org/10.48597/WVHP-WU69>, <https://doi.org/10.48597/4KYA-VXXW>

Bartolome, M., EMEP, 2018, Inorganics in air and particle phase at Campisabalos, data hosted by EBAS at NILU, Part of DOI: <https://doi.org/10.48597/HEBM-8TJR>, <https://doi.org/10.48597/8S4A-VDZ6>, <https://doi.org/10.48597/6ZN8-VTZD>, <https://doi.org/10.48597/MQZK-6KTT>, <https://doi.org/10.48597/H75V-DN8Z>

Bartolome, M., EMEP, 2018, Inorganics in air and particle phase at Els Torms, data hosted by EBAS at NILU, Part of DOI: <https://doi.org/10.48597/JR6D-F5WF>, <https://doi.org/10.48597/NMH6-SBYT>, <https://doi.org/10.48597/2FWB-E39R>, <https://doi.org/10.48597/FWCM-VWJ4>, <https://doi.org/10.48597/5E2C-M2KD>

Bartolome, M., EMEP, 2018, Inorganics in air and particle phase at Els Torms, data hosted by EBAS at NILU, Part of DOI: <https://doi.org/10.48597/MFTD-UYAK>, <https://doi.org/10.48597/KS2C-394J>, <https://doi.org/10.48597/ZHBJ-9M29>, <https://doi.org/10.48597/RFCV-4DNK>, <https://doi.org/10.48597/DJ8C-M9W8>

Bartolome, M., EMEP, 2018, Inorganics in air and particle phase at O Saviñao, data hosted by EBAS at NILU, Part of DOI: <https://doi.org/10.48597/AK43-C68Z>, <https://doi.org/10.48597/F9A6-9YXQ>, <https://doi.org/10.48597/NTTZ-HVVG>

Bartolome, M., EMEP, 2018, Inorganics in air and particle phase at Penausende, data hosted by EBAS at NILU, Part of DOI: <https://doi.org/10.48597/TDHZ-8ARX>, <https://doi.org/10.48597/KXPD-D53P>, <https://doi.org/10.48597/SSNF-45YH>

Bartolome, M., EMEP, 2018, Inorganics in air and particle phase at San Pablo de los Montes, data hosted by EBAS at NILU, Part of DOI: <https://doi.org/10.48597/QZSV-CVG6>, <https://doi.org/10.48597/F99V-P4ZP>, <https://doi.org/10.48597/3Q93-PT4F>, <https://doi.org/10.48597/GPFP-FXGC>, <https://doi.org/10.48597/ZTZS-QZFH>

Bartolome, M., EMEP, 2018, Inorganics in air and particle phase at San Pablo de los Montes, data hosted by EBAS at NILU, Part of DOI: <https://doi.org/10.48597/SV2W-758J>, <https://doi.org/10.48597/RVVR-EXR2>, <https://doi.org/10.48597/WS53-NRMN>, <https://doi.org/10.48597/ZKNT-9ZWK>, <https://doi.org/10.48597/HCKR-NWDR>

Bartolome, M., EMEP, 2018, Inorganics in air and particle phase at San Pablo de los Montes, data hosted by EBAS at NILU, Part of DOI: <https://doi.org/10.48597/SV2W-758J>, <https://doi.org/10.48597/WS53-NRMN>, <https://doi.org/10.48597/ZKNT-9ZWK>, <https://doi.org/10.48597/HCKR-NWDR>

Bartolome, M., EMEP, 2018, Inorganics in air and particle phase at Viznar, data hosted by EBAS at NILU, Part of DOI: <https://doi.org/10.48597/2ZAT-QDJS>, <https://doi.org/10.48597/YGTE-JJNX>, <https://doi.org/10.48597/GPPU-PU2J>, <https://doi.org/10.48597/8CNE-E6J9>, <https://doi.org/10.48597/WS82-JRGE>

Bartolome, M., EMEP, 2018, Inorganics in air and particle phase at Viznar, data hosted by EBAS at NILU, Part of DOI: <https://doi.org/10.48597/J2X2-VSK3>, <https://doi.org/10.48597/4KR5-UZBR>, <https://doi.org/10.48597/NC7V-BZHY>, <https://doi.org/10.48597/U3DM-Y83K>, <https://doi.org/10.48597/QHYA-TKMV>

Bartolome, M., EMEP, 2018, Inorganics in air and particle phase at Zarra, data hosted by EBAS at NILU, Part of DOI: <https://doi.org/10.48597/XRUX-W6YS>, <https://doi.org/10.48597/5E9Q-DBND>, <https://doi.org/10.48597/AG79-463Y>

Bartolome, M., EMEP, 2018, OC/EC at Campisabalos, data hosted by EBAS at NILU, Part of DOI: <https://doi.org/10.48597/FK23-CH86>

Bartolome, M., EMEP, 2018, OC/EC at Els Torms, data hosted by EBAS at NILU, Part of DOI: <https://doi.org/10.48597/HZFF-WERU>

Bartolome, M., EMEP, 2018, OC/EC at San Pablo de los Montes, data hosted by EBAS at NILU, Part of DOI: <https://doi.org/10.48597/D34Y-9TYU>

Bartolome, M., EMEP, 2018, OC/EC at Viznar, data hosted by EBAS at NILU, Part of DOI: <https://doi.org/10.48597/RPDB-BJ9Y>

Bartolome, M., EMEP, 2018, OC/EC at Zarra, data hosted by EBAS at NILU, Part of DOI: <https://doi.org/10.48597/Q6CH-7M6W>

Bartolome, M., EMEP, 2018, Pm25\_mass at Barcarrota, data hosted by EBAS at NILU, Part of DOI: <https://doi.org/10.48597/4YJ8-C3YC>

Bartolome, M., EMEP, 2018, Pm25\_mass at Cabo de Creus, data hosted by EBAS at NILU, Part of DOI: <https://doi.org/10.48597/YKA7-UKYR>

Bartolome, M., EMEP, 2018, Pm25\_mass at Campisabalos, data hosted by EBAS at NILU, Part of DOI: <https://doi.org/10.48597/W8RP-2EDN>

Bartolome, M., EMEP, 2018, Pm25\_mass at Els Torms, data hosted by EBAS at NILU, Part of DOI: <https://doi.org/10.48597/6D3A-TX5M>

Bartolome, M., EMEP, 2018, Pm25\_mass at O Saviñao, data hosted by EBAS at NILU, Part of DOI: <https://doi.org/10.48597/59E9-84U3>

Bartolome, M., EMEP, 2018, Pm25\_mass at Penausende, data hosted by EBAS at NILU, Part of DOI: <https://doi.org/10.48597/FZPZ-TBK4>

Bartolome, M., EMEP, 2018, Pm25\_mass at San Pablo de los Montes, data hosted by EBAS at NILU, Part of DOI: <https://doi.org/10.48597/8JY6-R22T>

Bartolome, M., EMEP, 2018, Pm25\_mass at Viznar, data hosted by EBAS at NILU, Part of DOI: <https://doi.org/10.48597/9H9P-MFJ8>

Bartolome, M., EMEP, 2018, Pm25\_mass at Zarra, data hosted by EBAS at NILU, Part of DOI: <https://doi.org/10.48597/YYBT-BM2E>

Bartolome, M., EMEP, 2019, Pm10\_mass at Campisabalos, data hosted by EBAS at NILU, Part of DOI: <https://doi.org/10.48597/W74T-EMGC>

Bartolome, M., EMEP, 2019, Pm10\_mass at O Saviñao, data hosted by EBAS at NILU, Part of DOI: <https://doi.org/10.48597/MAPB-HWDC>

Bartolome, M., EMEP, 2019, Pm10\_mass at Penausende, data hosted by EBAS at NILU, Part of DOI: <https://doi.org/10.48597/DH5E-NFGE>

Bartolome, M., EMEP, 2019, Pm10\_mass at Zarra, data hosted by EBAS at NILU, Part of DOI: <https://doi.org/10.48597/W4F8-JHVW>

Bergmans, B., FONSNY, E., ACTRIS, CAMPAIGN, COLOSSAL, GAW-WDCA, 2018, OC/EC at TMNT09 Vielsalm, data hosted by EBAS at NILU, Part of DOI: <https://doi.org/10.48597/BHKX-8BVX>

Berkhout, H., CAMP, EMEP, 2015, Inorganics in air and particle phase at De Zilk, data hosted by EBAS at NILU, Part of DOI: <https://doi.org/10.48597/ZXRM-N9JY>, <https://doi.org/10.48597/F8NB-DVU7>

Berkhout, H., EMEP, 2013, OC/EC and pm25\_mass at Cabauw Wielsekade, data hosted by EBAS at NILU, Part of DOI: <https://doi.org/10.48597/FNGC-ZT43>

Berkhout, H., EMEP, 2013, Pm10\_mass at Cabauw Wielsekade, data hosted by EBAS at NILU, Part of DOI: <https://doi.org/10.48597/ZJ7M-HMVH>

Berkhout, H., EMEP, 2013, Pm10\_mass at De Zilk, data hosted by EBAS at NILU, Part of DOI: <https://doi.org/10.48597/B6NG-HP68>

Berkhout, H., EMEP, 2013, Pm10\_mass at Eibergen, data hosted by EBAS at NILU, Part of DOI: <https://doi.org/10.48597/ZFTC-V352>

Berkhout, H., EMEP, 2013, Pm10\_mass at Kollumerwaard, data hosted by EBAS at NILU, Part of DOI: <https://doi.org/10.48597/EZNH-PXC3>

Berkhout, H., EMEP, 2013, Pm10\_mass at Vredepeel, data hosted by EBAS at NILU, Part of DOI: <https://doi.org/10.48597/582X-SG9R>

Berkhout, H., EMEP, 2013, Pm25\_mass at De Zilk, data hosted by EBAS at NILU, Part of DOI: <https://doi.org/10.48597/DE4V-VWCW>

Berkhout, H., EMEP, 2013, Pm25\_mass at Kollumerwaard, data hosted by EBAS at NILU, Part of DOI: <https://doi.org/10.48597/FDYG-2DVQ>

Berkhout, H., EMEP, 2013, Pm25\_mass at Vredepeel, data hosted by EBAS at NILU, Part of DOI: <https://doi.org/10.48597/PE8Q-7TM5>

Berkhout, H., EMEP, 2015, Inorganics in air and particle phase at Vredepeel, data hosted by EBAS at NILU, Part of DOI: <https://doi.org/10.48597/W36A-C3QZ>, <https://doi.org/10.48597/ZK86-6JTP>

Berkhout, H., EMEP, 2015, OC/EC at Cabauw Wielsekade, data hosted by EBAS at NILU, Part of DOI: <https://doi.org/10.48597/4CAC-MX7R>

Berkhout, H., EMEP, 2015, OC/EC at Cabauw Wielsekade, data hosted by EBAS at NILU, Part of DOI: <https://doi.org/10.48597/DEGX-2JDM>

Berkhout, H., EMEP, 2015, Pm10\_mass at De Zilk, data hosted by EBAS at NILU, Part of DOI: <https://doi.org/10.48597/255A-84N7>

Berkhout, H., EMEP, 2015, Pm10\_mass at Eibergen, data hosted by EBAS at NILU, Part of DOI: <https://doi.org/10.48597/RJ4F-Z7UV>

Berkhout, H., EMEP, 2015, Pm10\_mass at Kollumerwaard, data hosted by EBAS at NILU, Part of DOI: <https://doi.org/10.48597/NTTT-4KB3>

Berkhout, H., EMEP, 2015, Pm10\_mass at Vredepeel, data hosted by EBAS at NILU, Part of DOI: <https://doi.org/10.48597/UYGH-2HWV>

Berkhout, H., EMEP, 2023, Pm25\_mass at Cabauw Wielsekade, data hosted by EBAS at NILU, Part of DOI: <https://doi.org/10.48597/ZCQJ-R5Y5>

Berkhout, H., EMEP, 2023, Pm25\_mass at De Zilk, data hosted by EBAS at NILU, Part of DOI: <https://doi.org/10.48597/WP7C-MHCB>

Berkhout, H., EMEP, 2023, Pm25\_mass at Kollumerwaard, data hosted by EBAS at NILU, Part of DOI: <https://doi.org/10.48597/CP5W-UZH7>

Berkhout, H., EMEP, 2023, Pm25\_mass at Vredepeel, data hosted by EBAS at NILU, Part of DOI: <https://doi.org/10.48597/8RBS-UE93>

Berkhout, J., EMEP, 2012, OC/EC at Cabauw Zijdeweg, data hosted by EBAS at NILU, Part of DOI: <https://doi.org/10.48597/XUBN-HQ98>

Berkhout, J., EMEP, 2012, Pm10\_mass at De Zilk, data hosted by EBAS at NILU, Part of DOI: <https://doi.org/10.48597/E8WP-TE2R>

Berkhout, J., EMEP, 2012, Pm10\_mass at Eibergen, data hosted by EBAS at NILU, Part of DOI: <https://doi.org/10.48597/ZFTC-V352>

Berkhout, J., EMEP, 2012, Pm10\_mass at Kollumerwaard, data hosted by EBAS at NILU, Part of DOI: <https://doi.org/10.48597/EZNH-PXC3>

Berkhout, J., EMEP, 2012, Pm10\_mass at Vredepeel, data hosted by EBAS at NILU, Part of DOI: <https://doi.org/10.48597/582X-SG9R>

Berkhout, J., EMEP, 2012, Pm25\_mass at Cabauw Zijdweg, data hosted by EBAS at NILU, Part of DOI: <https://doi.org/10.48597/JUMH-EQR5>

Berkhout, J., EMEP, 2012, Pm25\_mass at De Zilk, data hosted by EBAS at NILU, Part of DOI: <https://doi.org/10.48597/FT9G-P2RQ>

Berkhout, J., EMEP, 2012, Pm25\_mass at Kollumerwaard, data hosted by EBAS at NILU, Part of DOI: <https://doi.org/10.48597/K89Y-SCXT>

Berkhout, J., EMEP, 2012, Pm25\_mass at Vredepeel, data hosted by EBAS at NILU, Part of DOI: <https://doi.org/10.48597/2W89-GRTV>

Berkhout, J., EMEP, 2014, Pm10\_mass at Cabauw Wielsekade, data hosted by EBAS at NILU, Part of DOI: <https://doi.org/10.48597/49QA-W8H6>

Berkhout, J., EMEP, 2014, Pm10\_mass at De Zilk, data hosted by EBAS at NILU, Part of DOI: <https://doi.org/10.48597/TGQ4-PBM5>

Berkhout, J., EMEP, 2014, Pm10\_mass at Eibergen, data hosted by EBAS at NILU, Part of DOI: <https://doi.org/10.48597/B36Y-UCDG>

Berkhout, J., EMEP, 2014, Pm10\_mass at Kollumerwaard, data hosted by EBAS at NILU, Part of DOI: <https://doi.org/10.48597/3ZWZ-ESZB>

Berkhout, J., EMEP, 2014, Pm10\_mass at Vredepeel, data hosted by EBAS at NILU, Part of DOI: <https://doi.org/10.48597/82GU-FXY6>

Berkhout, J., EMEP, 2014, Pm25\_mass at Cabauw Wielsekade, data hosted by EBAS at NILU, Part of DOI: <https://doi.org/10.48597/T7D4-F28F>

Berkhout, J., EMEP, 2014, Pm25\_mass at Kollumerwaard, data hosted by EBAS at NILU, Part of DOI: <https://doi.org/10.48597/7G38-69QN>

Berkhout, J., EMEP, 2014, Pm25\_mass at Vredepeel, data hosted by EBAS at NILU, Part of DOI: <https://doi.org/10.48597/BBY8-N8KF>

Berkhout, J., EMEP, 2015, Pm25\_mass at De Zilk, data hosted by EBAS at NILU, Part of DOI: <https://doi.org/10.48597/JKN3-X6FM>

Bieber, E., CAMP, EMEP, 2013, Inorganics in air and particle phase at Westerland, data hosted by EBAS at NILU, Part of DOI: <https://doi.org/10.48597/KP46-Y4GJ>

Bieber, E., CAMP, EMEP, 2016, Inorganics in air and particle phase at Westerland, data hosted by EBAS at NILU, Part of DOI: <https://doi.org/10.48597/MXA8-6R6J>, <https://doi.org/10.48597/8596-9NDJ>

Bieber, E., CAMP, EMEP, 2016, Inorganics in air and particle phase at Westerland, data hosted by EBAS at NILU, Part of DOI: <https://doi.org/10.48597/R3AA-YAN7>, <https://doi.org/10.48597/8596-9NDJ>, <https://doi.org/10.48597/V4U5-8U4U>

Bieber, E., CAMP, EMEP, 2017, Inorganics in air and particle phase at Westerland, data hosted by EBAS at NILU, Part of DOI: <https://doi.org/10.48597/R3AA-YAN7>, <https://doi.org/10.48597/8596-9NDJ>, <https://doi.org/10.48597/V4U5-8U4U>

Bieber, E., CAMP, EMEP, 2018, Inorganics in air and particle phase at Westerland, data hosted by EBAS at NILU, Part of DOI: <https://doi.org/10.48597/VNRY-5E4J>

Bieber, E., CAMPAIGN, EMEP, 2004, OC/EC at Waldhof, data hosted by EBAS at NILU, Part of DOI: <https://doi.org/10.48597/G5ZZ-PG4Q>

Bieber, E., CAMPAIGN, EMEP, 2007, Pm10\_mass at Schmücke, data hosted by EBAS at NILU, Part of DOI: <https://doi.org/10.48597/U4GS-UNT5>

Bieber, E., CAMPAIGN, EMEP, 2007, Pm10\_mass at Westerland, data hosted by EBAS at NILU, Part of DOI: <https://doi.org/10.48597/HZRA-HSTD>

Bieber, E., CAMPAIGN, EMEP, 2007, Pm10\_mass at Zingst, data hosted by EBAS at NILU, Part of DOI: <https://doi.org/10.48597/Y3F5-YGXY>

Bieber, E., CAMPAIGN, EMEP, 2007, Pm25\_mass at Neuglobsow, data hosted by EBAS at NILU, Part of DOI: <https://doi.org/10.48597/H5H3-WMBA>

Bieber, E., EMEP, 2000, Pm10\_mass at Deuselbach, data hosted by EBAS at NILU, Part of DOI: <https://doi.org/10.48597/VE8D-C5RM>

Bieber, E., EMEP, 2001, Pm10\_mass at Brotjacklriegel, data hosted by EBAS at NILU, Part of DOI: <https://doi.org/10.48597/YHWH-FS6H>

Bieber, E., EMEP, 2001, Pm10\_mass at Waldhof, data hosted by EBAS at NILU, Part of DOI: <https://doi.org/10.48597/7NKN-MRTW>

Bieber, E., EMEP, 2003, Pm10\_mass at Brotjacklriegel, data hosted by EBAS at NILU, Part of DOI: <https://doi.org/10.48597/MMHK-25UK>



Bieber, E., EMEP, 2003, Pm10\_mass at Deuselbach, data hosted by EBAS at NILU, Part of DOI: <https://doi.org/10.48597/6TKR-9VSN>

Bieber, E., EMEP, 2003, Pm25\_mass at Deuselbach, data hosted by EBAS at NILU, Part of DOI: <https://doi.org/10.48597/MS8P-XRBA>

Bieber, E., EMEP, 2008, Pm10\_mass at Neuglobsow, data hosted by EBAS at NILU, Part of DOI: <https://doi.org/10.48597/8KTW-EFHD>

Bieber, E., EMEP, 2008, Pm10\_mass at Schauinsland, data hosted by EBAS at NILU, Part of DOI: <https://doi.org/10.48597/Z7JT-6AW4>

Bieber, E., EMEP, 2008, Pm10\_mass at Schmücke, data hosted by EBAS at NILU, Part of DOI: <https://doi.org/10.48597/F95D-G4FC>

Bieber, E., EMEP, 2008, Pm10\_mass at Waldhof, data hosted by EBAS at NILU, Part of DOI: <https://doi.org/10.48597/E4EY-J55Q>

Bieber, E., EMEP, 2008, Pm10\_mass at Waldhof, data hosted by EBAS at NILU, Part of DOI: <https://doi.org/10.48597/GZ2V-EU8W>

Bieber, E., EMEP, 2008, Pm10\_mass at Westerland, data hosted by EBAS at NILU, Part of DOI: <https://doi.org/10.48597/XQCS-TY79>

Bieber, E., EMEP, 2008, Pm10\_mass at Zingst, data hosted by EBAS at NILU, Part of DOI: <https://doi.org/10.48597/H8QX-ZFPC>

Bieber, E., EMEP, 2008, Pm25\_mass at Schauinsland, data hosted by EBAS at NILU, Part of DOI: <https://doi.org/10.48597/CTH3-JHU2>

Bieber, E., EMEP, 2010, Pm10\_mass at Neuglobsow, data hosted by EBAS at NILU, Part of DOI: <https://doi.org/10.48597/7PU3-38G4>

Bieber, E., EMEP, 2010, Pm10\_mass at Schauinsland, data hosted by EBAS at NILU, Part of DOI: <https://doi.org/10.48597/PFMY-6M7C>

Bieber, E., EMEP, 2010, Pm10\_mass at Schmücke, data hosted by EBAS at NILU, Part of DOI: <https://doi.org/10.48597/GGV2-QSH3>

Bieber, E., EMEP, 2010, Pm10\_mass at Waldhof, data hosted by EBAS at NILU, Part of DOI: <https://doi.org/10.48597/EST5-XB6M>

Bieber, E., EMEP, 2010, Pm10\_mass at Zingst, data hosted by EBAS at NILU, Part of DOI: <https://doi.org/10.48597/5JUS-YJ6B>

Bieber, E., EMEP, 2010, Pm25\_mass at Waldhof, data hosted by EBAS at NILU, Part of DOI: <https://doi.org/10.48597/464U-TZVG>

Bieber, E., EMEP, 2010, Pm25\_mass at Waldhof, data hosted by EBAS at NILU, Part of DOI: <https://doi.org/10.48597/YPXF-S2YR>

Bieber, E., EMEP, 2012, Inorganics in air and particle phase at Neuglobsow, data hosted by EBAS at NILU, Part of DOI: <https://doi.org/10.48597/YD8D-6VTQ>

Bieber, E., EMEP, 2012, Inorganics in air and particle phase at Schauinsland, data hosted by EBAS at NILU, Part of DOI: <https://doi.org/10.48597/86PD-VMZV>

Bieber, E., EMEP, 2012, Inorganics in air and particle phase at Schmücke, data hosted by EBAS at NILU, Part of DOI: <https://doi.org/10.48597/PSSJ-XTV9>

Bieber, E., EMEP, 2012, Inorganics in air and particle phase at Waldhof, data hosted by EBAS at NILU, Part of DOI: <https://doi.org/10.48597/23MY-ZH63>

Bieber, E., EMEP, 2012, OC/EC at Neuglobsow, data hosted by EBAS at NILU, Part of DOI: <https://doi.org/10.48597/VF58-6PJD>

Bieber, E., EMEP, 2012, OC/EC at Schauinsland, data hosted by EBAS at NILU, Part of DOI: <https://doi.org/10.48597/2K86-PEUV>

Bieber, E., EMEP, 2012, OC/EC at Schmücke, data hosted by EBAS at NILU, Part of DOI: <https://doi.org/10.48597/GN5R-8MVB>

Bieber, E., EMEP, 2012, OC/EC at Waldhof, data hosted by EBAS at NILU, Part of DOI: <https://doi.org/10.48597/E76A-YW4E>

Bieber, E., EMEP, 2012, PM mass at Neuglobsow, data hosted by EBAS at NILU, Part of DOI: <https://doi.org/10.48597/JJDJ-KP6M>

Bieber, E., EMEP, 2012, PM mass at Schauinsland, data hosted by EBAS at NILU, Part of DOI: <https://doi.org/10.48597/T47T-K2GG>

Bieber, E., EMEP, 2012, PM mass at Schmücke, data hosted by EBAS at NILU, Part of DOI: <https://doi.org/10.48597/A4Y9-8YBD>

Bieber, E., EMEP, 2012, PM mass at Waldhof, data hosted by EBAS at NILU, Part of DOI: <https://doi.org/10.48597/38AU-CVMR>

Bieber, E., EMEP, 2012, Pm10\_mass at Westerland, data hosted by EBAS at NILU, Part of DOI: <https://doi.org/10.48597/7TJ8-PWRK>

Bieber, E., EMEP, 2012, Pm10\_mass at Zingst, data hosted by EBAS at NILU, Part of DOI: <https://doi.org/10.48597/F9KM-BCSE>

Bieber, E., EMEP, 2013, Inorganics in air and particle phase at Zingst, data hosted by EBAS at NILU, Part of DOI: <https://doi.org/10.48597/JZJU-8B4H>

Bieber, E., EMEP, 2013, OC/EC at Neuglobsow, data hosted by EBAS at NILU, Part of DOI: <https://doi.org/10.48597/VF58-6PJD>

Bieber, E., EMEP, 2013, OC/EC at Schauinsland, data hosted by EBAS at NILU, Part of DOI: <https://doi.org/10.48597/2K86-PEUV>

Bieber, E., EMEP, 2013, OC/EC at Schmücke, data hosted by EBAS at NILU, Part of DOI: <https://doi.org/10.48597/GN5R-8MVB>

Bieber, E., EMEP, 2013, OC/EC at Waldhof, data hosted by EBAS at NILU, Part of DOI: <https://doi.org/10.48597/E76A-YW4E>

Bieber, E., EMEP, 2013, PM mass at Neuglobsow, data hosted by EBAS at NILU, Part of DOI: <https://doi.org/10.48597/JJDJ-KP6M>

Bieber, E., EMEP, 2013, PM mass at Schauinsland, data hosted by EBAS at NILU, Part of DOI: <https://doi.org/10.48597/T47T-K2GG>

Bieber, E., EMEP, 2013, PM mass at Schmücke, data hosted by EBAS at NILU, Part of DOI: <https://doi.org/10.48597/A4Y9-8YBD>

Bieber, E., EMEP, 2013, PM mass at Waldhof, data hosted by EBAS at NILU, Part of DOI: <https://doi.org/10.48597/38AU-CVMR>

Bieber, E., EMEP, 2013, Pm10\_mass at Westerland, data hosted by EBAS at NILU, Part of DOI: <https://doi.org/10.48597/7TJ8-PWRK>

Bieber, E., EMEP, 2013, Pm10\_mass at Zingst, data hosted by EBAS at NILU, Part of DOI: <https://doi.org/10.48597/F9KM-BCSE>

Bieber, E., EMEP, 2014, Inorganics in air and particle phase at Neuglobsow, data hosted by EBAS at NILU, Part of DOI: <https://doi.org/10.48597/YD8D-6VTQ>

Bieber, E., EMEP, 2014, Inorganics in air and particle phase at Schauinsland, data hosted by EBAS at NILU, Part of DOI: <https://doi.org/10.48597/86PD-VMZV>

Bieber, E., EMEP, 2014, Inorganics in air and particle phase at Schmücke, data hosted by EBAS at NILU, Part of DOI: <https://doi.org/10.48597/PRBG-3DQ8>

Bieber, E., EMEP, 2014, Inorganics in air and particle phase at Waldhof, data hosted by EBAS at NILU, Part of DOI: <https://doi.org/10.48597/23MY-ZH63>

Bieber, E., EMEP, 2014, PM mass at Neuglobsow, data hosted by EBAS at NILU, Part of DOI: <https://doi.org/10.48597/JJDJ-KP6M>

Bieber, E., EMEP, 2014, PM mass at Schauinsland, data hosted by EBAS at NILU, Part of DOI: <https://doi.org/10.48597/T47T-K2GG>

Bieber, E., EMEP, 2014, PM mass at Schmücke, data hosted by EBAS at NILU, Part of DOI: <https://doi.org/10.48597/A4Y9-8YBD>

Bieber, E., EMEP, 2014, PM mass at Waldhof, data hosted by EBAS at NILU, Part of DOI: <https://doi.org/10.48597/38AU-CVMR>

Bieber, E., EMEP, 2014, Pm10\_mass at Brotjacklriegel, data hosted by EBAS at NILU, Part of DOI: <https://doi.org/10.48597/MMHK-25UK>

Bieber, E., EMEP, 2014, Pm10\_mass at Brotjacklriegel, data hosted by EBAS at NILU, Part of DOI: <https://doi.org/10.48597/YHWH-FS6H>

Bieber, E., EMEP, 2014, Pm10\_mass at Deuselbach, data hosted by EBAS at NILU, Part of DOI: <https://doi.org/10.48597/6TKR-9VSN>

Bieber, E., EMEP, 2014, Pm10\_mass at Deuselbach, data hosted by EBAS at NILU, Part of DOI: <https://doi.org/10.48597/VE8D-C5RM>

Bieber, E., EMEP, 2014, Pm10\_mass at Neuglobsow, data hosted by EBAS at NILU, Part of DOI: <https://doi.org/10.48597/7PU3-38G4>

Bieber, E., EMEP, 2014, Pm10\_mass at Neuglobsow, data hosted by EBAS at NILU, Part of DOI: <https://doi.org/10.48597/8KTW-EFHD>

Bieber, E., EMEP, 2014, Pm10\_mass at Schauinsland, data hosted by EBAS at NILU, Part of DOI: <https://doi.org/10.48597/PFMY-6M7C>

Bieber, E., EMEP, 2014, Pm10\_mass at Schauinsland, data hosted by EBAS at NILU, Part of DOI: <https://doi.org/10.48597/Z7JT-6AW4>

Bieber, E., EMEP, 2014, Pm10\_mass at Schmücke, data hosted by EBAS at NILU, Part of DOI: <https://doi.org/10.48597/F95D-G4FC>

Bieber, E., EMEP, 2014, Pm10\_mass at Schmücke, data hosted by EBAS at NILU, Part of DOI: <https://doi.org/10.48597/GGV2-QSH3>

Bieber, E., EMEP, 2014, Pm10\_mass at Waldhof, data hosted by EBAS at NILU, Part of DOI: <https://doi.org/10.48597/7NKN-MRTW>

Bieber, E., EMEP, 2014, Pm10\_mass at Waldhof, data hosted by EBAS at NILU, Part of DOI: <https://doi.org/10.48597/E4EY-J55Q>

Bieber, E., EMEP, 2014, Pm10\_mass at Waldhof, data hosted by EBAS at NILU, Part of DOI: <https://doi.org/10.48597/EST5-XB6M>

Bieber, E., EMEP, 2014, Pm10\_mass at Westerland, data hosted by EBAS at NILU, Part of DOI: <https://doi.org/10.48597/7TJ8-PWRK>

Bieber, E., EMEP, 2014, Pm10\_mass at Westerland, data hosted by EBAS at NILU, Part of DOI: <https://doi.org/10.48597/XQCS-TY79>

Bieber, E., EMEP, 2014, Pm10\_mass at Zingst, data hosted by EBAS at NILU, Part of DOI: <https://doi.org/10.48597/5JUS-YJ6B>

Bieber, E., EMEP, 2014, Pm10\_mass at Zingst, data hosted by EBAS at NILU, Part of DOI: <https://doi.org/10.48597/F9KM-BCSE>

Bieber, E., EMEP, 2014, Pm10\_mass at Zingst, data hosted by EBAS at NILU, Part of DOI: <https://doi.org/10.48597/H8QX-ZFPC>

Bieber, E., EMEP, 2014, Pm25\_mass at Deuselbach, data hosted by EBAS at NILU, Part of DOI: <https://doi.org/10.48597/MS8P-XRBA>

Bieber, E., EMEP, 2014, Pm25\_mass at Neuglobsow, data hosted by EBAS at NILU, Part of DOI: <https://doi.org/10.48597/6S2D-UEMZ>

Bieber, E., EMEP, 2014, Pm25\_mass at Schauinsland, data hosted by EBAS at NILU, Part of DOI: <https://doi.org/10.48597/CTH3-JHU2>

Bieber, E., EMEP, 2014, Pm25\_mass at Schmücke, data hosted by EBAS at NILU, Part of DOI: <https://doi.org/10.48597/STMA-STEW>

Bieber, E., EMEP, 2014, Pm25\_mass at Waldhof, data hosted by EBAS at NILU, Part of DOI: <https://doi.org/10.48597/464U-TZVG>

Bieber, E., EMEP, 2015, Inorganics in air and particle phase at Neuglobsow, data hosted by EBAS at NILU, Part of DOI: <https://doi.org/10.48597/SY9M-J58J>, <https://doi.org/10.48597/RSV6-PDMG>

Bieber, E., EMEP, 2015, Inorganics in air and particle phase at Schauinsland, data hosted by EBAS at NILU, Part of DOI: <https://doi.org/10.48597/RNNG-3JZ4>, <https://doi.org/10.48597/K6CU-ZMN2>

Bieber, E., EMEP, 2015, Inorganics in air and particle phase at Schmücke, data hosted by EBAS at NILU, Part of DOI: <https://doi.org/10.48597/VMJV-3XMY>, <https://doi.org/10.48597/C98Y-UQD8>

Bieber, E., EMEP, 2015, Inorganics in air and particle phase at Waldhof, data hosted by EBAS at NILU, Part of DOI: <https://doi.org/10.48597/AKT3-UEVE>, <https://doi.org/10.48597/4SSA-A5AN>

Bieber, E., EMEP, 2015, Inorganics in air and particle phase at Westerland, data hosted by EBAS at NILU, Part of DOI: <https://doi.org/10.48597/P6TS-JVDF>

Bieber, E., EMEP, 2015, OC/EC at Neuglobsow, data hosted by EBAS at NILU, Part of DOI: <https://doi.org/10.48597/JZCB-KCBF>

Bieber, E., EMEP, 2015, OC/EC at Schauinsland, data hosted by EBAS at NILU, Part of DOI: <https://doi.org/10.48597/2K86-PEUV>

Bieber, E., EMEP, 2015, OC/EC at Schmücke, data hosted by EBAS at NILU, Part of DOI: <https://doi.org/10.48597/GN5R-8MVB>

Bieber, E., EMEP, 2015, OC/EC at Waldhof, data hosted by EBAS at NILU, Part of DOI: <https://doi.org/10.48597/E76A-YW4E>

Bieber, E., EMEP, 2016, Inorganics in air and particle phase at Neuglobsow, data hosted by EBAS at NILU, Part of DOI: <https://doi.org/10.48597/DN5G-GHCW>, <https://doi.org/10.48597/5MZJ-5694>

Bieber, E., EMEP, 2016, Inorganics in air and particle phase at Schauinsland, data hosted by EBAS at NILU, Part of DOI: <https://doi.org/10.48597/RKXJ-WNBU>, <https://doi.org/10.48597/5M89-ANSK>

Bieber, E., EMEP, 2016, Inorganics in air and particle phase at Schmücke, data hosted by EBAS at NILU, Part of DOI: <https://doi.org/10.48597/CW5C-Q3C5>, <https://doi.org/10.48597/WQCH-FMTN>

Bieber, E., EMEP, 2016, Inorganics in air and particle phase at Schmücke, data hosted by EBAS at NILU, Part of DOI: <https://doi.org/10.48597/YAH8-CWPD>, <https://doi.org/10.48597/WQCH-FMTN>, <https://doi.org/10.48597/UH2F-YX27>

Bieber, E., EMEP, 2016, Inorganics in air and particle phase at Waldhof, data hosted by EBAS at NILU, Part of DOI: <https://doi.org/10.48597/CTMU-XEE5>, <https://doi.org/10.48597/XKEF-59YX>

Bieber, E., EMEP, 2016, OC/EC at Neuglobsow, data hosted by EBAS at NILU, Part of DOI: <https://doi.org/10.48597/NTBE-CRJD>

Bieber, E., EMEP, 2016, OC/EC at Schauinsland, data hosted by EBAS at NILU, Part of DOI: <https://doi.org/10.48597/2WRM-UA7U>

Bieber, E., EMEP, 2016, OC/EC at Schmücke, data hosted by EBAS at NILU, Part of DOI: <https://doi.org/10.48597/EH4J-UEQ5>

Bieber, E., EMEP, 2016, OC/EC at Waldhof, data hosted by EBAS at NILU, Part of DOI: <https://doi.org/10.48597/D79A-AV4Q>

Bieber, E., EMEP, 2016, OC/EC at Waldhof, data hosted by EBAS at NILU, Part of DOI: <https://doi.org/10.48597/MNGD-A9YU>

Bieber, E., EMEP, 2018, Inorganics in air and particle phase at Neuglobsow, data hosted by EBAS at NILU, Part of DOI: <https://doi.org/10.48597/DN5G-GHCW>, <https://doi.org/10.48597/5MZJ-5694>

Bieber, E., EMEP, 2018, Inorganics in air and particle phase at Schauinsland, data hosted by EBAS at NILU, Part of DOI: <https://doi.org/10.48597/RKXJ-WNBU>, <https://doi.org/10.48597/5M89-ANSK>

Bieber, E., EMEP, 2018, Inorganics in air and particle phase at Schmücke, data hosted by EBAS at NILU, Part of DOI: <https://doi.org/10.48597/CW5C-Q3C5>, <https://doi.org/10.48597/WQCH-FMTN>

Bieber, E., EMEP, 2018, Inorganics in air and particle phase at Waldhof, data hosted by EBAS at NILU, Part of DOI: <https://doi.org/10.48597/CTMU-XEE5>, <https://doi.org/10.48597/XKEF-59YX>

Bieber, E., EMEP, 2018, OC/EC at Neuglobsow, data hosted by EBAS at NILU, Part of DOI: <https://doi.org/10.48597/NTBE-CRJD>

Bieber, E., EMEP, 2018, OC/EC at Schauinsland, data hosted by EBAS at NILU, Part of DOI: <https://doi.org/10.48597/2WRM-UA7U>

Bieber, E., EMEP, 2018, OC/EC at Schmücke, data hosted by EBAS at NILU, Part of DOI: <https://doi.org/10.48597/EH4J-UEQ5>

Bieber, E., EMEP, 2018, OC/EC at Waldhof, data hosted by EBAS at NILU, Part of DOI: <https://doi.org/10.48597/MNGD-A9YU>

Bieber, E., EMEP, 2019, Inorganics in air and particle phase at Neuglobsow, data hosted by EBAS at NILU, Part of DOI: <https://doi.org/10.48597/ZHQV-Q4AS>, <https://doi.org/10.48597/A3V5-A8AM>

Bieber, E., EMEP, 2019, Inorganics in air and particle phase at Schauinsland, data hosted by EBAS at NILU, Part of DOI: <https://doi.org/10.48597/Z36F-ME7D>, <https://doi.org/10.48597/NV43-TJN9>

Bieber, E., EMEP, 2019, Inorganics in air and particle phase at Schmücke, data hosted by EBAS at NILU, Part of DOI: <https://doi.org/10.48597/RHY7-GYQJ>, <https://doi.org/10.48597/ZT56-U779>

Bieber, E., EMEP, 2019, Inorganics in air and particle phase at Waldhof, data hosted by EBAS at NILU, Part of DOI: <https://doi.org/10.48597/JVWM-7KDU>, <https://doi.org/10.48597/WWD6-4G4R>

Bieber, E., EMEP, 2019, Inorganics in air and particle phase at Zingst, data hosted by EBAS at NILU, Part of DOI: <https://doi.org/10.48597/WFDN-DWCN>, <https://doi.org/10.48597/68CN-ANKJ>

Bieber, E., EMEP, 2019, OC/EC at Neuglobsow, data hosted by EBAS at NILU, Part of DOI: <https://doi.org/10.48597/NTBE-CRJD>

Bieber, E., EMEP, 2019, OC/EC at Schauinsland, data hosted by EBAS at NILU, Part of DOI: <https://doi.org/10.48597/2WRM-UA7U>

Bieber, E., EMEP, 2019, OC/EC at Schmücke, data hosted by EBAS at NILU, Part of DOI: <https://doi.org/10.48597/EH4J-UEQ5>

Bieber, E., EMEP, 2019, OC/EC at Waldhof, data hosted by EBAS at NILU, Part of DOI: <https://doi.org/10.48597/MNGD-A9YU>

Bieber, E., EMEP, 2019, OC/EC at Zingst, data hosted by EBAS at NILU, Part of DOI: <https://doi.org/10.48597/PQXT-NCS9>

Bieber, E., EMEP, 2020, Inorganics in air and particle phase at Neuglobsow, data hosted by EBAS at NILU, Part of DOI: <https://doi.org/10.48597/ZHQV-Q4AS>, <https://doi.org/10.48597/A3V5-A8AM>

Bieber, E., EMEP, 2020, Inorganics in air and particle phase at Schauinsland, data hosted by EBAS at NILU, Part of DOI: <https://doi.org/10.48597/9QFN-AWQ4>, <https://doi.org/10.48597/NV43-TJN9>

Bieber, E., EMEP, 2020, Inorganics in air and particle phase at Schauinsland, data hosted by EBAS at NILU, Part of DOI: <https://doi.org/10.48597/Z36F-ME7D>, <https://doi.org/10.48597/NV43-TJN9>

Bieber, E., EMEP, 2020, Inorganics in air and particle phase at Schmücke, data hosted by EBAS at NILU, Part of DOI: <https://doi.org/10.48597/RHY7-GYQJ>, <https://doi.org/10.48597/ZT56-U779>

Bieber, E., EMEP, 2020, Inorganics in air and particle phase at Waldhof, data hosted by EBAS at NILU, Part of DOI: <https://doi.org/10.48597/JVWM-7KDU>, <https://doi.org/10.48597/WWD6-4G4R>

Bieber, E., EMEP, 2020, Inorganics in air and particle phase at Westerland, data hosted by EBAS at NILU, Part of DOI: <https://doi.org/10.48597/6EJ8-UNDE>, <https://doi.org/10.48597/XGE9-EQB3>

Bieber, E., EMEP, 2020, Inorganics in air and particle phase at Zingst, data hosted by EBAS at NILU, Part of DOI: <https://doi.org/10.48597/WFDN-DWCN>, <https://doi.org/10.48597/68CN-ANKJ>

Bieber, E., EMEP, 2020, OC/EC at Neuglobsow, data hosted by EBAS at NILU, Part of DOI: <https://doi.org/10.48597/NTBE-CRJD>

Bieber, E., EMEP, 2020, OC/EC at Schauinsland, data hosted by EBAS at NILU, Part of DOI: <https://doi.org/10.48597/2WRM-UA7U>

Bieber, E., EMEP, 2020, OC/EC at Schmücke, data hosted by EBAS at NILU, Part of DOI: <https://doi.org/10.48597/EH4J-UEQ5>

Bieber, E., EMEP, 2020, OC/EC at Waldhof, data hosted by EBAS at NILU, Part of DOI: <https://doi.org/10.48597/MNGD-A9YU>

Bieber, E., EMEP, 2020, OC/EC at Zingst, data hosted by EBAS at NILU, Part of DOI: <https://doi.org/10.48597/PQXT-NCS9>

Bieber, E., EMEP, 2023, Pm10\_mass at Neuglobsow, data hosted by EBAS at NILU, Part of DOI: <https://doi.org/10.48597/CCZA-YAVM>

Bieber, E., EMEP, 2023, Pm10\_mass at Neuglobsow, data hosted by EBAS at NILU, Part of DOI: <https://doi.org/10.48597/FE62-AXAY>

Bieber, E., EMEP, 2023, Pm10\_mass at Schauinsland, data hosted by EBAS at NILU, Part of DOI: <https://doi.org/10.48597/V2NS-RRDW>

Bieber, E., EMEP, 2023, Pm10\_mass at Schauinsland, data hosted by EBAS at NILU, Part of DOI: <https://doi.org/10.48597/XQWK-FUW7>

Bieber, E., EMEP, 2023, Pm10\_mass at Schmücke, data hosted by EBAS at NILU, Part of DOI: <https://doi.org/10.48597/FBM7-6PWB>

Bieber, E., EMEP, 2023, Pm10\_mass at Schmücke, data hosted by EBAS at NILU, Part of DOI: <https://doi.org/10.48597/Y7JE-J86C>

Bieber, E., EMEP, 2023, Pm10\_mass at Waldhof, data hosted by EBAS at NILU, Part of DOI: <https://doi.org/10.48597/GXKA-X4CX>

Bieber, E., EMEP, 2023, Pm10\_mass at Waldhof, data hosted by EBAS at NILU, Part of DOI: <https://doi.org/10.48597/V6AH-BNJM>

Bieber, E., EMEP, 2023, Pm10\_mass at Westerland, data hosted by EBAS at NILU, Part of DOI: <https://doi.org/10.48597/4HWD-39W3>

Bieber, E., EMEP, 2023, Pm10\_mass at Westerland, data hosted by EBAS at NILU, Part of DOI: <https://doi.org/10.48597/KCXH-9RX6>

Bieber, E., EMEP, 2023, Pm10\_mass at Zingst, data hosted by EBAS at NILU, Part of DOI: <https://doi.org/10.48597/4M45-RS58>

Bieber, E., EMEP, 2023, Pm10\_mass at Zingst, data hosted by EBAS at NILU, Part of DOI: <https://doi.org/10.48597/KE6U-VR9G>

Bieber, E., EMEP, 2023, Pm25\_mass at Neuglobsow, data hosted by EBAS at NILU, Part of DOI: <https://doi.org/10.48597/3KHG-Y4WJ>

Bieber, E., EMEP, 2023, Pm25\_mass at Neuglobsow, data hosted by EBAS at NILU, Part of DOI: <https://doi.org/10.48597/ZRJA-RRGQ>

Bieber, E., EMEP, 2023, Pm25\_mass at Schauinsland, data hosted by EBAS at NILU, Part of DOI: <https://doi.org/10.48597/MGC4-DY7T>

Bieber, E., EMEP, 2023, Pm25\_mass at Schauinsland, data hosted by EBAS at NILU, Part of DOI: <https://doi.org/10.48597/USGF-3SAA>

Bieber, E., EMEP, 2023, Pm25\_mass at Schmücke, data hosted by EBAS at NILU, Part of DOI: <https://doi.org/10.48597/66BN-ZGA9>

Bieber, E., EMEP, 2023, Pm25\_mass at Schmücke, data hosted by EBAS at NILU, Part of DOI: <https://doi.org/10.48597/Y3PB-PSGW>

Bieber, E., EMEP, 2023, Pm25\_mass at Waldhof, data hosted by EBAS at NILU, Part of DOI: <https://doi.org/10.48597/8RKA-CGQ2>

Bieber, E., EMEP, 2023, Pm25\_mass at Waldhof, data hosted by EBAS at NILU, Part of DOI: <https://doi.org/10.48597/TX9H-EAPZ>

Bieber, E., EMEP, HELCOM, 2012, Inorganics in air and particle phase at Zingst, data hosted by EBAS at NILU, Part of DOI: <https://doi.org/10.48597/CYK4-UU58>

Bieber, E., EMEP, HELCOM, 2013, Inorganics in air and particle phase at Zingst, data hosted by EBAS at NILU, Part of DOI: <https://doi.org/10.48597/JZJU-8B4H>

Bieber, E., EMEP, HELCOM, 2016, Inorganics in air and particle phase at Zingst, data hosted by EBAS at NILU, Part of DOI: <https://doi.org/10.48597/9MSK-QUQ6>, <https://doi.org/10.48597/58JQ-JMXE>

Bieber, E., EMEP, HELCOM, 2017, Inorganics in air and particle phase at Zingst, data hosted by EBAS at NILU, Part of DOI: <https://doi.org/10.48597/9MSK-QUQ6>, <https://doi.org/10.48597/58JQ-JMXE>

Bieber, E., HELCOM, 2013, Sulphate\_total at Zingst, data hosted by EBAS at NILU, Part of DOI: <https://doi.org/10.48597/JZJU-8B4H>

Bieber, E., HELCOM, 2015, Inorganics in air and particle phase at Zingst, data hosted by EBAS at NILU, Part of DOI: <https://doi.org/10.48597/FVAM-32PN>

Birmili, W., GAW-WDCA, 2018, Ammonium at Melpitz, data hosted by EBAS at NILU, Part of DOI: <https://doi.org/10.48597/466W-DX8G>

Bolte, T., EMEP, 2008, Pm10\_mass at Iskrba, data hosted by EBAS at NILU, Part of DOI: <https://doi.org/10.48597/M3PJ-ABKK>

Bolte, T., EMEP, 2012, Pm10\_mass at Iskrba, data hosted by EBAS at NILU, Part of DOI: <https://doi.org/10.48597/ARSX-NMZ7>

Bolte, T., EMEP, 2012, Pm25\_mass at Iskrba, data hosted by EBAS at NILU, Part of DOI: <https://doi.org/10.48597/29GX-CSDS>

Bolte, T., EMEP, 2013, Pm10\_mass at Iskrba, data hosted by EBAS at NILU, Part of DOI: <https://doi.org/10.48597/ARSX-NMZ7>

Bolte, T., EMEP, 2013, Pm25\_mass at Iskrba, data hosted by EBAS at NILU, Part of DOI: <https://doi.org/10.48597/29GX-CSDS>

Bolte, T., EMEP, 2014, Pm10\_mass at Iskrba, data hosted by EBAS at NILU, Part of DOI: <https://doi.org/10.48597/ARSX-NMZ7>

Bolte, T., EMEP, 2014, Pm10\_mass at Iskrba, data hosted by EBAS at NILU, Part of DOI: <https://doi.org/10.48597/M3PJ-ABKK>

Bolte, T., EMEP, 2014, Pm25\_mass at Iskrba, data hosted by EBAS at NILU, Part of DOI: <https://doi.org/10.48597/29GX-CSDS>

Bouet, C., Yoboué, V., Marticorena, B., Rajot, J. L., Féron, A., Gaimoz, C., Maisonneuve, F., Siour, G., Valorso, R., Ki, A. F., Konaté, I., and Ouattara, A.: PM10 concentration, Lamto, Côte d'Ivoire, AERIS, 2021. <https://doi.org/10.25326/279>

Bourin, A., EMEP, 2021, OC/EC at Donon, data hosted by EBAS at NILU, Part of DOI: <https://doi.org/10.48597/3XVJ-6YGI>

Bourin, A., EMEP, 2021, OC/EC at Peyrusse Vieille, data hosted by EBAS at NILU, Part of DOI: <https://doi.org/10.48597/BNJD-GK6Y>

Bourin, A., EMEP, 2021, OC/EC at Revin, data hosted by EBAS at NILU, Part of DOI: <https://doi.org/10.48597/Q5X2-T4PH>

Bourin, A., EMEP, 2021, OC/EC at Saint-Nazaire-le-Désert, data hosted by EBAS at NILU, Part of DOI: <https://doi.org/10.48597/P4KP-3PFR>

Bourin, A., EMEP, 2021, OC/EC at Verneuil, data hosted by EBAS at NILU, Part of DOI: <https://doi.org/10.48597/5WD4-2ATU>

Bourin, A., EMEP, 2021, PM mass at Saint-Nazaire-le-Désert, data hosted by EBAS at NILU, Part of DOI: <https://doi.org/10.48597/RE9G-NKPD>, <https://doi.org/10.48597/YJRK-UNP6>

Bourin, A., EMEP, 2021, Pm10\_mass at Saint-Nazaire-le-Désert, data hosted by EBAS at NILU, Part of DOI: <https://doi.org/10.48597/D6U8-XYB6>

Bourin, A., EMEP, 2021, Pm25\_mass at Saint-Nazaire-le-Désert, data hosted by EBAS at NILU, Part of DOI: <https://doi.org/10.48597/7ZJG-4QMN>

Bourin, A., EMEP, 2021, Pm25\_mass at Saint-Nazaire-le-Désert, data hosted by EBAS at NILU, Part of DOI: <https://doi.org/10.48597/YJRK-UNP6>

Bourin, A., EMEP, 2022, Inorganics in air and particle phase at Donon, data hosted by EBAS at NILU, Part of DOI: <https://doi.org/10.48597/FHWZ-YYDS>

Bourin, A., EMEP, 2022, Inorganics in air and particle phase at Peyrusse Vieille, data hosted by EBAS at NILU, Part of DOI: <https://doi.org/10.48597/DW7X-2SXZ>

Bourin, A., EMEP, 2022, Inorganics in air and particle phase at Revin, data hosted by EBAS at NILU, Part of DOI: <https://doi.org/10.48597/KRR2-63E2>

Bourin, A., EMEP, 2022, Inorganics in air and particle phase at Saint-Nazaire-le-Désert, data hosted by EBAS at NILU, Part of DOI: <https://doi.org/10.48597/35RY-34Z3>

Bourin, A., EMEP, 2022, Inorganics in air and particle phase at Verneuil, data hosted by EBAS at NILU, Part of DOI: <https://doi.org/10.48597/KKS4-E5JC>

Bourin, A., EMEP, 2022, OC/EC and inorganics in air and particle phase at Kergoff, data hosted by EBAS at NILU, Part of DOI: <https://doi.org/10.48597/KD4K-HGQV>, <https://doi.org/10.48597/JHRK-ASTM>, <https://doi.org/10.48597/WYDM-5NC3>

Bourin, A., EMEP, 2022, Pm10\_mass at Kergoff, data hosted by EBAS at NILU, Part of DOI: <https://doi.org/10.48597/QZFF-KY8U>

Bourin, A., EMEP, 2022, Pm10\_mass at Revin, data hosted by EBAS at NILU, Part of DOI: <https://doi.org/10.48597/PSBV-D2TU>

Bourin, A., EMEP, 2022, Pm10\_mass at Saint-Nazaire-le-Désert, data hosted by EBAS at NILU, Part of DOI: <https://doi.org/10.48597/D6U8-XYB6>

Bourin, A., EMEP, 2022, Pm25\_mass at Kergoff, data hosted by EBAS at NILU, Part of DOI: <https://doi.org/10.48597/P83J-G3W9>

Bourin, A., EMEP, 2022, Pm25\_mass at Revin, data hosted by EBAS at NILU, Part of DOI: <https://doi.org/10.48597/WMEG-BNXX>

Bourin, A., EMEP, 2022, Pm25\_mass at Saint-Nazaire-le-Désert, data hosted by EBAS at NILU, Part of DOI: <https://doi.org/10.48597/7ZJG-4QMN>

Bourin, A., EMEP, 2023, Inorganics in air and particle phase at Donon, data hosted by EBAS at NILU, Part of DOI: <https://doi.org/10.48597/FHWZ-YYDS>, <https://doi.org/10.48597/DUNJ-NUVU>

Bourin, A., EMEP, 2023, Inorganics in air and particle phase at Peyrusse Vieille, data hosted by EBAS at NILU, Part of DOI: <https://doi.org/10.48597/DW7X-2SXZ>, <https://doi.org/10.48597/6A5Y-PZES>

Bourin, A., EMEP, 2023, Inorganics in air and particle phase at Revin, data hosted by EBAS at NILU, Part of DOI: <https://doi.org/10.48597/KRR2-63E2>, <https://doi.org/10.48597/QH8M-X2VU>

Bourin, A., EMEP, 2023, Inorganics in air and particle phase at Saint-Nazaire-le-Désert, data hosted by EBAS at NILU, Part of DOI: <https://doi.org/10.48597/35RY-34Z3>, <https://doi.org/10.48597/NC26-ZPD9>

Bourin, A., EMEP, 2023, Inorganics in air and particle phase at Verneuil, data hosted by EBAS at NILU, Part of DOI: <https://doi.org/10.48597/KKS4-E5JC>, <https://doi.org/10.48597/W5UZ-85U7>

Bourin, A., EMEP, 2023, OC/EC at Donon, data hosted by EBAS at NILU, Part of DOI: <https://doi.org/10.48597/3XVJ-6YGG>

Bourin, A., EMEP, 2023, OC/EC at Peyrusse Vieille, data hosted by EBAS at NILU, Part of DOI: <https://doi.org/10.48597/BNJD-GK6Y>

Bourin, A., EMEP, 2023, Pm10\_mass at Kergoff, data hosted by EBAS at NILU, Part of DOI: <https://doi.org/10.48597/QZFF-KY8U>

Bourin, A., EMEP, 2023, Pm10\_mass at Revin, data hosted by EBAS at NILU, Part of DOI: <https://doi.org/10.48597/PSBV-D2TU>

Bourin, A., EMEP, 2023, Pm25\_mass at Kergoff, data hosted by EBAS at NILU, Part of DOI: <https://doi.org/10.48597/P83J-G3W9>

Bourin, A., EMEP, 2023, Pm25\_mass at Revin, data hosted by EBAS at NILU, Part of DOI: <https://doi.org/10.48597/WMEG-BNXX>

Bourin, A., EMEP, 2024, Inorganics in air and particle phase at Donon, data hosted by EBAS at NILU, Part of DOI: <https://doi.org/10.48597/FHWZ-YYDS>

Bourin, A., EMEP, 2024, Inorganics in air and particle phase at Kergoff, data hosted by EBAS at NILU, Part of DOI: <https://doi.org/10.48597/KD4K-HGQV>

Bourin, A., EMEP, 2024, Inorganics in air and particle phase at Peyrusse Vieille, data hosted by EBAS at NILU, Part of DOI: <https://doi.org/10.48597/DW7X-2SXZ>

Bourin, A., EMEP, 2024, Inorganics in air and particle phase at Revin, data hosted by EBAS at NILU, Part of DOI: <https://doi.org/10.48597/KRR2-63E2>

Bourin, A., EMEP, 2024, Inorganics in air and particle phase at Saint-Nazaire-le-Désert, data hosted by EBAS at NILU, Part of DOI: <https://doi.org/10.48597/35RY-34Z3>

Bourin, A., EMEP, 2024, Inorganics in air and particle phase at Verneuil, data hosted by EBAS at NILU, Part of DOI: <https://doi.org/10.48597/KKS4-E5JC>

Bourin, A., EMEP, 2024, PM mass at Donon, data hosted by EBAS at NILU, Part of DOI: <https://doi.org/10.48597/RDBP-9P27>

Bourin, A., EMEP, 2024, PM mass at Donon, data hosted by EBAS at NILU, Part of DOI: <https://doi.org/10.48597/XBKN-UPKG>

Bourin, A., EMEP, 2024, PM mass at Kergoff, data hosted by EBAS at NILU, Part of DOI: <https://doi.org/10.48597/BP94-AQEC>

Bourin, A., EMEP, 2024, PM mass at Kergoff, data hosted by EBAS at NILU, Part of DOI: <https://doi.org/10.48597/UY4X-UANM>

Bourin, A., EMEP, 2024, PM mass at La Coulonche, data hosted by EBAS at NILU, Part of DOI: <https://doi.org/10.48597/DVRM-DJGQ>

Bourin, A., EMEP, 2024, PM mass at La Coulonche, data hosted by EBAS at NILU, Part of DOI: <https://doi.org/10.48597/ZDEB-ADRC>

Bourin, A., EMEP, 2024, PM mass at Peyrusse Vieille, data hosted by EBAS at NILU, Part of DOI: <https://doi.org/10.48597/8ZB6-95U5>

Bourin, A., EMEP, 2024, PM mass at Peyrusse Vieille, data hosted by EBAS at NILU, Part of DOI: <https://doi.org/10.48597/NPFV-RJ9Z>

Bourin, A., EMEP, 2024, PM mass at Revin, data hosted by EBAS at NILU, Part of DOI: <https://doi.org/10.48597/K39H-W2AG>

Bourin, A., EMEP, 2024, PM mass at Saint-Nazaire-le-Désert, data hosted by EBAS at NILU, Part of DOI: <https://doi.org/10.48597/DKG4-SEM6>

Bourin, A., EMEP, 2024, Pm10\_mass at La Tardière, data hosted by EBAS at NILU, Part of DOI: <https://doi.org/10.48597/QKQX-7WDV>

Bourin, A., EMEP, 2024, Pm10\_mass at Montandon, data hosted by EBAS at NILU, Part of DOI: <https://doi.org/10.48597/43NM-GA6W>

Bourin, A., EMEP, 2024, Pm10\_mass at Morvan, data hosted by EBAS at NILU, Part of DOI: <https://doi.org/10.48597/QTKR-EY62>

Bourin, A., EMEP, 2024, Pm25\_mass at La Tardière, data hosted by EBAS at NILU, Part of DOI: <https://doi.org/10.48597/H3MA-Q3YP>

Bourin, A., EMEP, 2024, Pm25\_mass at Morvan, data hosted by EBAS at NILU, Part of DOI: <https://doi.org/10.48597/4VFR-JG55>

Bourin, A., EMEP, 2024, Pm25\_mass at Verneuil, data hosted by EBAS at NILU, Part of DOI: <https://doi.org/10.48597/9EQX-AQY2>

Braban, C., CAMP, EMEP, 2014, Pm10\_mass at Auchencorth Moss, data hosted by EBAS at NILU, Part of DOI: <https://doi.org/10.48597/SPHF-9C9V>

Braban, C., CAMP, EMEP, 2014, Pm10\_mass at Auchencorth Moss, data hosted by EBAS at NILU, Part of DOI: <https://doi.org/10.48597/UWQE-YHSE>

Braban, C., CAMP, EMEP, 2014, Pm25\_mass at Auchencorth Moss, data hosted by EBAS at NILU, Part of DOI: <https://doi.org/10.48597/JTEF-TC4B>

Braban, C., CAMP, EMEP, 2015, Inorganics in air and particle phase at Auchencorth Moss, data hosted by EBAS at NILU, Part of DOI: <https://doi.org/10.48597/8KH8-6WSE>, <https://doi.org/10.48597/T2YD-BSEQ>, <https://doi.org/10.48597/CQ3Z-YFAS>, <https://doi.org/10.48597/8G4Q-DGT6>, <https://doi.org/10.48597/S77F-TWVW>, <https://doi.org/10.48597/QYC8-EQUN>, <https://doi.org/10.48597/2K5A-MP78>, <https://doi.org/10.48597/8UGC-QAVC>, <https://doi.org/10.48597/Z7H5-X82R>, <https://doi.org/10.48597/Z7P2-WXG6>

Braban, C., CAMP, EMEP, 2015, Pm25\_mass at Auchencorth Moss, data hosted by EBAS at NILU, Part of DOI: <https://doi.org/10.48597/FVSU-DUEA>

Braban, C., EMEP, 2013, Inorganics in air and particle phase at Auchencorth Moss, data hosted by EBAS at NILU, Part of DOI: <https://doi.org/10.48597/WRW5-BS4S>

Braban, C., EMEP, 2013, Pm10\_mass at Auchencorth Moss, data hosted by EBAS at NILU, Part of DOI: <https://doi.org/10.48597/UWQE-YHSE>

Braban, C., EMEP, 2013, Pm25\_mass at Auchencorth Moss, data hosted by EBAS at NILU, Part of DOI: <https://doi.org/10.48597/FVSU-DUEA>

Braban, C., EMEP, 2015, Inorganics in air and particle phase at Auchencorth Moss, data hosted by EBAS at NILU, Part of DOI: <https://doi.org/10.48597/8KH8-6WSE>, <https://doi.org/10.48597/T2YD-BSEQ>, <https://doi.org/10.48597/CQ3Z-YFAS>, <https://doi.org/10.48597/8G4Q-DGT6>, <https://doi.org/10.48597/S77F-TWVW>,



<https://doi.org/10.48597/QYC8-EQUN>, <https://doi.org/10.48597/2K5A-MP78>, <https://doi.org/10.48597/8UGC-QAVC>, <https://doi.org/10.48597/Z7H5-X82R>, <https://doi.org/10.48597/Z7P2-WXG6>

- [illegible]

Braban, C., EMEP, 2023, Inorganics in air and particle phase at Auchencorth Moss, data hosted by EBAS at NILU, Part of DOI: <https://doi.org/10.48597/WRW5-BS4S>, <https://doi.org/10.48597/8G4Q-DGT6>, <https://doi.org/10.48597/Z7H5-X82R>

Braban, C., EMEP, 2023, PM mass at Auchencorth Moss, data hosted by EBAS at NILU, Part of DOI: <https://doi.org/10.48597/AF52-Q23C>, <https://doi.org/10.48597/P2MX-6SBM>

Calidonna, C., Ammoscato, I., Gulli, D., GAW-WDCA, 2015, Pm10\_mass at Lamezia Terme, data hosted by EBAS at NILU, Part of DOI: <https://doi.org/10.48597/CT8F-WJ6P>

Calidonna, C., Ammoscato, I., Gulli, D., GAW-WDCA, 2016, Pm10\_mass at Lamezia Terme, data hosted by EBAS at NILU, Part of DOI: <https://doi.org/10.48597/CT8F-WJ6P>

Cape, J., EMEP, 2012, Pm10\_mass at Auchencorth Moss, data hosted by EBAS at NILU, Part of DOI: <https://doi.org/10.48597/89MZ-JVCR>

Cape, J., EMEP, 2012, Sulphate\_corrected at Auchencorth Moss, data hosted by EBAS at NILU, Part of DOI: <https://doi.org/10.48597/6KN8-XPTM>

Cape, J., Telling, S., EMEP, 2012, PM mass at Harwell, data hosted by EBAS at NILU, Part of DOI: <https://doi.org/10.48597/B6ZN-EREE>

Cape, J., Telling, S., EMEP, 2012, Pm10\_mass at Harwell, data hosted by EBAS at NILU, Part of DOI: <https://doi.org/10.48597/5XWE-N7CA>

Cape, J., Telling, S., EMEP, 2012, Sulphate\_corrected at Harwell, data hosted by EBAS at NILU, Part of DOI: <https://doi.org/10.48597/9AYP-D33D>

Cape, N., CAMPAIGN, EMEP, 2004, OC/EC and pm10\_mass at CEH Edinburgh, data hosted by EBAS at NILU, Part of DOI: <https://doi.org/10.48597/8CV5-XQV4>

Cape, N., CAMPAIGN, EMEP, 2004, OC/EC and pm10\_mass at CEH Edinburgh, data hosted by EBAS at NILU, Part of DOI: <https://doi.org/10.48597/PG2J-DU6G>

Carvalho, R., CAMPAIGN, EMEP, 2004, OC/EC and pm10\_mass at Braganca, data hosted by EBAS at NILU, Part of DOI: <https://doi.org/10.48597/Y2V4-Z3WX>

Cavalli, F., ACTRIS, CAMPAIGN, COLOSSAL, EMEP, GAW-WDCA, 2023, OC/EC at Ispra, data hosted by EBAS at NILU, Part of DOI: <https://doi.org/10.48597/3TX4-UP28>

Cavalli, F., Douglas, K., ACTRIS, EMEP, GAW-WDCA, 2015, OC/EC at Ispra, data hosted by EBAS at NILU, Part of DOI: <https://doi.org/10.48597/CKHK-M6PR>

Cavalli, F., Douglas, K., ACTRIS, EMEP, GAW-WDCA, 2023, OC/EC at Ispra, data hosted by EBAS at NILU, Part of DOI: <https://doi.org/10.48597/VC4P-M5G6>

Cavalli, F., EMEP, 2012, Inorganics in air and particle phase at Ispra, data hosted by EBAS at NILU, Part of DOI: <https://doi.org/10.48597/V29Z-875S>

Cavalli, F., EMEP, 2012, Pm25\_mass at Ispra, data hosted by EBAS at NILU, Part of DOI: <https://doi.org/10.48597/49A3-ZDQU>

Cavalli, F., EMEP, 2013, OC/EC at Ispra, data hosted by EBAS at NILU, Part of DOI: <https://doi.org/10.48597/F2SX-YGW3>

Cavalli, F., EMEP, 2013, Pm25\_mass at Ispra, data hosted by EBAS at NILU, Part of DOI: <https://doi.org/10.48597/49A3-ZDQU>

Cavalli, F., EMEP, 2015, Elemental\_carbon at Ispra, data hosted by EBAS at NILU, Part of DOI: <https://doi.org/10.48597/R37S-NWZE>

Cavalli, F., EMEP, 2015, Inorganics in air and particle phase at Ispra, data hosted by EBAS at NILU, Part of DOI: <https://doi.org/10.48597/N3ND-T8RG>, <https://doi.org/10.48597/N54H-PNEB>, <https://doi.org/10.48597/VJBG-2D36>, <https://doi.org/10.48597/PBKJ-3EC6>

Cavalli, F., EMEP, 2015, Organic\_carbon at Ispra, data hosted by EBAS at NILU, Part of DOI: <https://doi.org/10.48597/VD46-J7U7>

Cavalli, F., EMEP, 2018, Inorganics in air and particle phase at Ispra, data hosted by EBAS at NILU, Part of DOI: <https://doi.org/10.48597/3YJR-RZPS>, <https://doi.org/10.48597/YU8D-CCB8>, <https://doi.org/10.48597/6W6S-GZVB>

Cavalli, F., EMEP, 2023, Inorganics in air and particle phase at Ispra, data hosted by EBAS at NILU, Part of DOI: <https://doi.org/10.48597/3MAQ-X9BY>, <https://doi.org/10.48597/68NU-J9B9>

Cavalli, F., EMEP, EUSAAR, GAW-WDCA, 2013, OC/EC at Ispra, data hosted by EBAS at NILU, Part of DOI: <https://doi.org/10.48597/DFH3-7R4K>

Cavalli, F., Passarella, R., EMEP, 2015, Inorganics in air and particle phase at Ispra, data hosted by EBAS at NILU, Part of DOI: <https://doi.org/10.48597/JX4R-WSAT>, <https://doi.org/10.48597/S7S6-RTGV>

Cavalli, F., Passarella, R., EMEP, 2023, Inorganics in air and particle phase at Ispra, data hosted by EBAS at NILU, Part of DOI: <https://doi.org/10.48597/3MAQ-X9BY>

Cavalli, F., Passarella, R., EMEP, 2023, Inorganics in air and particle phase at Ispra, data hosted by EBAS at NILU, Part of DOI: <https://doi.org/10.48597/3MAQ-X9BY>, <https://doi.org/10.48597/68NU-J9B9>

Cavalli, F., Passarella, R., EMEP, 2023, Inorganics in air and particle phase at Ispra, data hosted by EBAS at NILU, Part of DOI: <https://doi.org/10.48597/9W69-4YAT>, <https://doi.org/10.48597/7GNH-5NJ3>, <https://doi.org/10.48597/N7JR-425X>, <https://doi.org/10.48597/68NU-J9B9>, <https://doi.org/10.48597/NSM8-E3R8>

Cavalli, F., Passarella, R., EMEP, 2024, Inorganics in air and particle phase at Ispra, data hosted by EBAS at NILU, Part of DOI: <https://doi.org/10.48597/3MAQ-X9BY>, <https://doi.org/10.48597/68NU-J9B9>

Cavalli, F., Putaud, J., ACTRIS, EMEP, GAW-WDCA, 2023, OC/EC at Ispra, data hosted by EBAS at NILU, Part of DOI: <https://doi.org/10.48597/JUES-KGVb>

Cavalli, F., Putaud, J., ACTRIS, EMEP, GAW-WDCA, 2023, OC/EC at Ispra, data hosted by EBAS at NILU, Part of DOI: <https://doi.org/10.48597/VC4P-M5G6>

Ceburnis, D., CAMPAIGN, EMEP, 2009, OC/EC at Mace Head, data hosted by EBAS at NILU, Part of DOI: <https://doi.org/10.48597/JFRX-DWUZ>

Ceburnis, D., EMEP, 2010, Pm25\_mass at Mace Head, data hosted by EBAS at NILU, Part of DOI: <https://doi.org/10.48597/C9J3-PBKQ>

Chalupnickova, E., EMEP, GAW-WDCA, 2020, OC/EC at Kosetice (NAOK), data hosted by EBAS at NILU, Part of DOI: <https://doi.org/10.48597/4JUY-439N>

Chalupnickova, E., EMEP, GAW-WDCA, 2020, OC/EC at Kosetice (NAOK), data hosted by EBAS at NILU, Part of DOI: <https://doi.org/10.48597/MMX3-GPF6>

Christopher, C., EMEP, 2015, Inorganics in air and particle phase at Harwell, data hosted by EBAS at NILU, Part of DOI: <https://doi.org/10.48597/2B34-8T7T>, <https://doi.org/10.48597/VVWQ-ACYF>, <https://doi.org/10.48597/NTXV-AMGU>, <https://doi.org/10.48597/7CCE-SMEH>, <https://doi.org/10.48597/YVU6-JMEB>, <https://doi.org/10.48597/QKZ8-AV5S>, <https://doi.org/10.48597/FU8F-ZQ2B>, <https://doi.org/10.48597/XGKT-SDQN>, <https://doi.org/10.48597/YM9A-ZNAS>, <https://doi.org/10.48597/VPR2-42WF>

Christopher, C., EMEP, 2016, Inorganics in air and particle phase at Harwell, data hosted by EBAS at NILU, Part of DOI: <https://doi.org/10.48597/2B34-8T7T>, <https://doi.org/10.48597/VVWQ-ACYF>, <https://doi.org/10.48597/NTXV-AMGU>, <https://doi.org/10.48597/7CCE-SMEH>, <https://doi.org/10.48597/YVU6-JMEB>, <https://doi.org/10.48597/QKZ8-AV5S>, <https://doi.org/10.48597/FU8F-ZQ2B>, <https://doi.org/10.48597/XGKT-SDQN>, <https://doi.org/10.48597/YM9A-ZNAS>, <https://doi.org/10.48597/VPR2-42WF>

Christopher, C., EMEP, 2017, Inorganics in air and particle phase at Chilbolton Observatory, data hosted by EBAS at NILU, Part of DOI: <https://doi.org/10.48597/37CQ-SAZD>, <https://doi.org/10.48597/HFHS-WUB3>, <https://doi.org/10.48597/TAHZ-TRB6>, <https://doi.org/10.48597/G8SD-NJGG>, <https://doi.org/10.48597/WQMB-ZV94>, <https://doi.org/10.48597/9784-P7T2>, <https://doi.org/10.48597/SB65-V2HD>, <https://doi.org/10.48597/EAKU-NN9U>, <https://doi.org/10.48597/CMSZ-X8EM>, <https://doi.org/10.48597/P3E8-JBZ4>

Christopher, C., EMEP, 2018, Inorganics in air and particle phase at Chilbolton Observatory, data hosted by EBAS at NILU, Part of DOI: <https://doi.org/10.48597/37CQ-SAZD>, <https://doi.org/10.48597/HFHS-WUB3>, <https://doi.org/10.48597/TAHZ-TRB6>, <https://doi.org/10.48597/G8SD-NJGG>, <https://doi.org/10.48597/WQMB-ZV94>, <https://doi.org/10.48597/9784-P7T2>, <https://doi.org/10.48597/SB65-V2HD>, <https://doi.org/10.48597/EAKU-NN9U>, <https://doi.org/10.48597/CMSZ-X8EM>, <https://doi.org/10.48597/P3E8-JBZ4>

Christopher, C., EMEP, 2019, Inorganics in air and particle phase at Chilbolton Observatory, data hosted by EBAS at NILU, Part of DOI: <https://doi.org/10.48597/37CQ-SAZD>, <https://doi.org/10.48597/HFHS-WUB3>, <https://doi.org/10.48597/TAHZ-TRB6>, <https://doi.org/10.48597/G8SD-NJGG>, <https://doi.org/10.48597/WQMB-ZV94>, <https://doi.org/10.48597/9784-P7T2>, <https://doi.org/10.48597/SB65-V2HD>, <https://doi.org/10.48597/EAKU-NN9U>, <https://doi.org/10.48597/CMSZ-X8EM>, <https://doi.org/10.48597/P3E8-JBZ4>

Christopher, C., EMEP, 2020, Inorganics in air and particle phase at Chilbolton Observatory, data hosted by EBAS at NILU, Part of DOI: <https://doi.org/10.48597/37CQ-SAZD>, <https://doi.org/10.48597/HFHS-WUB3>, <https://doi.org/10.48597/TAHZ-TRB6>, <https://doi.org/10.48597/G8SD-NJGG>, <https://doi.org/10.48597/WQMB-ZV94>, <https://doi.org/10.48597/9784-P7T2>, <https://doi.org/10.48597/SB65-V2HD>, <https://doi.org/10.48597/EAKU-NN9U>, <https://doi.org/10.48597/CMSZ-X8EM>, <https://doi.org/10.48597/P3E8-JBZ4>

Christopher, C., EMEP, 2021, Inorganics in air and particle phase at Chilbolton Observatory, data hosted by EBAS at NILU, Part of DOI: <https://doi.org/10.48597/37CQ-SAZD>, <https://doi.org/10.48597/HFHS-WUB3>, <https://doi.org/10.48597/TAHZ-TRB6>, <https://doi.org/10.48597/G8SD-NJGG>, <https://doi.org/10.48597/WQMB-ZV94>, <https://doi.org/10.48597/9784-P7T2>, <https://doi.org/10.48597/SB65-V2HD>, <https://doi.org/10.48597/EAKU-NN9U>, <https://doi.org/10.48597/CMSZ-X8EM>, <https://doi.org/10.48597/P3E8-JBZ4>

Christopher, C., EMEP, 2023, Inorganics in air and particle phase at Chilbolton Observatory, data hosted by EBAS at NILU, Part of DOI: <https://doi.org/10.48597/CNW5-7FRG>, <https://doi.org/10.48597/G8SD-NJGG>, <https://doi.org/10.48597/CMSZ-X8EM>

Christopher, C., EMEP, 2023, Inorganics in air and particle phase at Chilbolton Observatory, data hosted by EBAS at NILU, Part of DOI: <https://doi.org/10.48597/JRFJ-8ZAZ>

Conil, S., EMEP, 2021, Pm10\_mass at Observatoire Perenne de l'Environnement, data hosted by EBAS at NILU, Part of DOI: <https://doi.org/10.48597/A5BC-RQFZ>

Conil, S., EMEP, 2022, Pm10\_mass at Observatoire Perenne de l'Environnement, data hosted by EBAS at NILU, Part of DOI: <https://doi.org/10.48597/PF5C-DVNG>

Conil, S., EMEP, 2022, Pm25\_mass at Observatoire Perenne de l'Environnement, data hosted by EBAS at NILU, Part of DOI: <https://doi.org/10.48597/EK7Z-4X95>

Conolly, C., CAMP, EMEP, 2014, Pm10\_mass at Harwell, data hosted by EBAS at NILU, Part of DOI: <https://doi.org/10.48597/3V8A-NWQF>

Conolly, C., CAMP, EMEP, 2014, Pm25\_mass at Harwell, data hosted by EBAS at NILU, Part of DOI: <https://doi.org/10.48597/EE8D-EFP5>

Conolly, C., CAMP, EMEP, 2015, Inorganics in air and particle phase at Harwell, data hosted by EBAS at NILU, Part of DOI: <https://doi.org/10.48597/2B34-8T7T>, <https://doi.org/10.48597/VVWQ-ACYF>, <https://doi.org/10.48597/NTXV-AMGU>, <https://doi.org/10.48597/7CCE-SMEH>, <https://doi.org/10.48597/YVU6-JMEB>, <https://doi.org/10.48597/QKZ8-AV5S>, <https://doi.org/10.48597/FU8F-ZQ2B>, <https://doi.org/10.48597/XGKT-SDQN>, <https://doi.org/10.48597/YM9A-ZNAS>, <https://doi.org/10.48597/VPR2-42WF>

Contini, D., Dinoi, A., GAW-WDCA, 2021, Pm10\_mass at Lecce (ECO), data hosted by EBAS at NILU, Part of DOI: <https://doi.org/10.48597/MVH6-A7F6>

Contini, D., Dinoi, A., GAW-WDCA, 2021, Pm25\_mass at Lecce (ECO), data hosted by EBAS at NILU, Part of DOI: <https://doi.org/10.48597/DZXW-SVJK>

Couret, C., GAW-WDCA, 2023, Pm10\_mass at Zugspitze-Schneefernerhaus, data hosted by EBAS at NILU, Part of DOI: <https://doi.org/10.48597/5GXJ-39J6>

Degorska, A., EMEP, 2006, Pm10\_mass at Diabla Gora, data hosted by EBAS at NILU, Part of DOI: <https://doi.org/10.48597/EE7N-6F42>

Degorska, A., EMEP, 2007, Pm10\_mass at Diabla Gora, data hosted by EBAS at NILU, Part of DOI: <https://doi.org/10.48597/EE7N-6F42>

Degorska, A., EMEP, 2009, Pm10\_mass at Diabla Gora, data hosted by EBAS at NILU, Part of DOI: <https://doi.org/10.48597/EE7N-6F42>

Degorska, A., EMEP, 2010, Pm10\_mass at Diabla Gora, data hosted by EBAS at NILU, Part of DOI: <https://doi.org/10.48597/EE7N-6F42>

Degorska, A., EMEP, 2010, Pm25\_mass at Diabla Gora, data hosted by EBAS at NILU, Part of DOI: <https://doi.org/10.48597/AVW5-MQVE>

Degorska, A., EMEP, 2011, OC/EC and sodium at Diabla Gora, data hosted by EBAS at NILU, Part of DOI: <https://doi.org/10.48597/BEKW-BSSW>

Degorska, A., EMEP, 2012, Inorganics in air and particle phase at Diabla Gora, data hosted by EBAS at NILU, Part of DOI: <https://doi.org/10.48597/C72G-4RT6>

Degorska, A., EMEP, 2012, OC/EC at Diabla Gora, data hosted by EBAS at NILU, Part of DOI: <https://doi.org/10.48597/Y6WC-Y38E>

Degorska, A., EMEP, 2012, Pm10\_mass at Diabla Gora, data hosted by EBAS at NILU, Part of DOI: <https://doi.org/10.48597/EE7N-6F42>

Degorska, A., EMEP, 2012, Pm25\_mass at Diabla Gora, data hosted by EBAS at NILU, Part of DOI: <https://doi.org/10.48597/AVW5-MQVE>

Degorska, A., EMEP, 2013, OC/EC at Diabla Gora, data hosted by EBAS at NILU, Part of DOI: <https://doi.org/10.48597/Y6WC-Y38E>

Degorska, A., EMEP, 2013, Pm10\_mass at Diabla Gora, data hosted by EBAS at NILU, Part of DOI: <https://doi.org/10.48597/EE7N-6F42>

Degorska, A., EMEP, 2013, Pm25\_mass at Diabla Gora, data hosted by EBAS at NILU, Part of DOI: <https://doi.org/10.48597/AVW5-MQVE>

Degorska, A., EMEP, 2014, Inorganics in air and particle phase at Diabla Gora, data hosted by EBAS at NILU, Part of DOI: <https://doi.org/10.48597/5K8B-V7EJ>

Degorska, A., EMEP, 2014, OC/EC at Diabla Gora, data hosted by EBAS at NILU, Part of DOI: <https://doi.org/10.48597/X5AS-PYKQ>, <https://doi.org/10.48597/UQKZ-3R8P>

Degorska, A., EMEP, 2014, Pm10\_mass at Diabla Gora, data hosted by EBAS at NILU, Part of DOI: <https://doi.org/10.48597/EE7N-6F42>

Degorska, A., EMEP, 2014, Pm25\_mass at Diabla Gora, data hosted by EBAS at NILU, Part of DOI: <https://doi.org/10.48597/AVW5-MQVE>

Degorska, A., EMEP, 2015, Inorganics in air and particle phase at Diabla Gora, data hosted by EBAS at NILU, Part of DOI: <https://doi.org/10.48597/R97A-FEMH>, <https://doi.org/10.48597/PDWH-WQNK>, <https://doi.org/10.48597/E8EA-5KYU>, <https://doi.org/10.48597/2F64-XU4Z>, <https://doi.org/10.48597/899R-M4JJ>

Degorska, A., EMEP, 2016, Inorganics in air and particle phase at Diabla Gora, data hosted by EBAS at NILU, Part of DOI: <https://doi.org/10.48597/HQMX-24SS>, <https://doi.org/10.48597/4HHD-R9Q6>

Degorska, A., EMEP, 2016, Inorganics in air and particle phase at Diabla Gora, data hosted by EBAS at NILU, Part of DOI: <https://doi.org/10.48597/TPDN-WRFC>, <https://doi.org/10.48597/62FY-4BT4>

Degorska, A., EMEP, 2016, OC/EC at Diabla Gora, data hosted by EBAS at NILU, Part of DOI: <https://doi.org/10.48597/9FBP-JRP2>

Degorska, A., EMEP, 2023, Inorganics in air and particle phase at Diabla Gora, data hosted by EBAS at NILU, Part of DOI: <https://doi.org/10.48597/J36E-7CHJ>

Degorska, A., EMEP, 2023, Inorganics in air and particle phase at Diabla Gora, data hosted by EBAS at NILU, Part of DOI: <https://doi.org/10.48597/J36E-7CHJ>, <https://doi.org/10.48597/K6CQ-KBQE>

Degorska, A., EMEP, 2023, Inorganics in air and particle phase at Diabla Gora, data hosted by EBAS at NILU, Part of DOI: <https://doi.org/10.48597/XKWD-GZ6Z>, <https://doi.org/10.48597/JKBF-V4C4>

Degorska, A., EMEP, 2023, OC/EC at Diabla Gora, data hosted by EBAS at NILU, Part of DOI: <https://doi.org/10.48597/PEQG-9XKC>

Degorska, A., EMEP, 2023, Pm10\_mass at Diabla Gora, data hosted by EBAS at NILU, Part of DOI: <https://doi.org/10.48597/EE7N-6F42>

Degorska, A., EMEP, 2023, Pm25\_mass at Diabla Gora, data hosted by EBAS at NILU, Part of DOI: <https://doi.org/10.48597/AVW5-MQVE>

Degorska, A., EMEP, 2023, Sulphate\_corrected at Diabla Gora, data hosted by EBAS at NILU, Part of DOI: <https://doi.org/10.48597/K6CQ-KBQE>

Degorska, A., EMEP, 2024, Inorganics in air and particle phase at Diabla Gora, data hosted by EBAS at NILU, Part of DOI: <https://doi.org/10.48597/J36E-7CHJ>, <https://doi.org/10.48597/K6CQ-KBQE>

Dvorska, A., ACTRIS, EMEP, GAW-WDCA, 2016, OC/EC at Kosetice (NAOK), data hosted by EBAS at NILU, Part of DOI: <https://doi.org/10.48597/AW5Q-X9G3>

Dvorska, A., ACTRIS, EMEP, GAW-WDCA, 2019, OC/EC at Kosetice (NAOK), data hosted by EBAS at NILU, Part of DOI: <https://doi.org/10.48597/AW5Q-X9G3>

EMEP, 2009, Pm10\_mass at La Tardière, data hosted by EBAS at NILU, Part of DOI: <https://doi.org/10.48597/AYG9-MB3Q>

EMEP, 2009, Pm10\_mass at Peyrusse Vieille, data hosted by EBAS at NILU, Part of DOI: <https://doi.org/10.48597/DNNK-MY5Y>

Eiko, N., CAMPAIGN, EMEP, 2007, Inorganics in air and particle phase at Harwell, data hosted by EBAS at NILU, Part of DOI: <https://doi.org/10.48597/GK55-7JGP>

Eiko, N., CAMPAIGN, EMEP, 2007, Nitrate at Harwell, data hosted by EBAS at NILU, Part of DOI: <https://doi.org/10.48597/8SVH-X2RC>

Eiko, N., CAMPAIGN, EMEP, 2008, Inorganics in air and particle phase at Auchencorth Moss, data hosted by EBAS at NILU, Part of DOI: <https://doi.org/10.48597/BB8C-5EF2>

Elawadi, A., GAW-WDCA, 2016, Pm10\_mass at Cairo, data hosted by EBAS at NILU, Part of DOI: <https://doi.org/10.48597/H3JY-P34R>

Elawadi, A., GAW-WDCA, 2016, Pm10\_mass at Hurghada, data hosted by EBAS at NILU, Part of DOI: <https://doi.org/10.48597/4AEA-TNPA>

Elawadi, A., GAW-WDCA, 2016, Pm10\_mass at Marsa Matruh, data hosted by EBAS at NILU, Part of DOI: <https://doi.org/10.48597/9V98-FZNH>

Elawadi, A., GAW-WDCA, 2017, Pm10\_mass at Marsa Matruh, data hosted by EBAS at NILU, Part of DOI: <https://doi.org/10.48597/9V98-FZNH>

Eleftheriadis, K., Diapouli, E., ACTRIS, 2020, OC/EC at DEM\_Athens, data hosted by EBAS at NILU, Part of DOI: <https://doi.org/10.48597/HVDD-DCWN>

Elizaga, F., Lambas, M., CAMP, 2011, Inorganics in air and particle phase at Noia, data hosted by EBAS at NILU, Part of DOI: <https://doi.org/10.48597/6B3G-ECMC>

Elizaga, F., Lambas, M., CAMP, EMEP, 2011, Inorganics in air and particle phase at Niembro, data hosted by EBAS at NILU, Part of DOI: <https://doi.org/10.48597/4AS8-KT23>

Elizaga, F., Lambas, M., EMEP, 2005, Inorganics in air and particle phase at Barcarrota, data hosted by EBAS at NILU, Part of DOI: <https://doi.org/10.48597/FVR8-YZWY>

Elizaga, F., Lambas, M., EMEP, 2005, Inorganics in air and particle phase at Cabo de Creus, data hosted by EBAS at NILU, Part of DOI: <https://doi.org/10.48597/Q8D8-DEWM>

Elizaga, F., Lambas, M., EMEP, 2005, Inorganics in air and particle phase at Campisabalos, data hosted by EBAS at NILU, Part of DOI: <https://doi.org/10.48597/HXPU-UBTR>

Elizaga, F., Lambas, M., EMEP, 2005, Inorganics in air and particle phase at Els Torms, data hosted by EBAS at NILU, Part of DOI: <https://doi.org/10.48597/5D2U-F5QZ>

Elizaga, F., Lambas, M., EMEP, 2005, Inorganics in air and particle phase at O Saviñao, data hosted by EBAS at NILU, Part of DOI: <https://doi.org/10.48597/HGPX-V2XY>

Elizaga, F., Lambas, M., EMEP, 2005, Inorganics in air and particle phase at Penausende, data hosted by EBAS at NILU, Part of DOI: <https://doi.org/10.48597/8DEG-YMK9>

Elizaga, F., Lambas, M., EMEP, 2005, Inorganics in air and particle phase at Viznar, data hosted by EBAS at NILU, Part of DOI: <https://doi.org/10.48597/Y6HH-KY5R>

Elizaga, F., Lambas, M., EMEP, 2005, Inorganics in air and particle phase at Zarra, data hosted by EBAS at NILU, Part of DOI: <https://doi.org/10.48597/PYKH-MKH7>

Elizaga, F., Lambas, M., EMEP, 2008, Elemental\_carbon at Campisabalos, data hosted by EBAS at NILU, Part of DOI: <https://doi.org/10.48597/D49N-QXMM>

Elizaga, F., Lambas, M., EMEP, 2008, Elemental\_carbon at Campisabalos, data hosted by EBAS at NILU, Part of DOI: <https://doi.org/10.48597/MTCJ-PMSX>

Elizaga, F., Lambas, M., EMEP, 2008, Organic\_carbon at Campisabalos, data hosted by EBAS at NILU, Part of DOI: <https://doi.org/10.48597/EA3N-9Q2B>

Elizaga, F., Lambas, M., EMEP, 2009, Ammonium at Campisabalos, data hosted by EBAS at NILU, Part of DOI: <https://doi.org/10.48597/6ZJ3-2GRR>

Elizaga, F., Lambas, M., EMEP, 2009, Ammonium at Campisabalos, data hosted by EBAS at NILU, Part of DOI: <https://doi.org/10.48597/SKTN-H46U>

Elizaga, F., Lambas, M., EMEP, 2009, Ammonium at Campisabalos, data hosted by EBAS at NILU, Part of DOI: <https://doi.org/10.48597/XPGW-VKP3>

Elizaga, F., Lambas, M., EMEP, 2009, Inorganics in air and particle phase at Campisabalos, data hosted by EBAS at NILU, Part of DOI: <https://doi.org/10.48597/KHFA-A53T>

Elizaga, F., Lambas, M., EMEP, 2009, Inorganics in air and particle phase at Campisabalos, data hosted by EBAS at NILU, Part of DOI: <https://doi.org/10.48597/TVZD-HRTR>

Elizaga, F., Lambas, M., EMEP, 2009, Nitrate at Campisabalos, data hosted by EBAS at NILU, Part of DOI: <https://doi.org/10.48597/9Q45-2XZB>

Elizaga, F., Lambas, M., EMEP, 2009, Pm25\_mass at Viznar, data hosted by EBAS at NILU, Part of DOI: <https://doi.org/10.48597/DZKP-B9D4>

Elizaga, F., Lambas, M., EMEP, 2009, Sodium at Campisabalos, data hosted by EBAS at NILU, Part of DOI: <https://doi.org/10.48597/ED9Y-4P2H>

Elizaga, F., Lambas, M., EMEP, 2010, Inorganics in air and particle phase at Doñana, data hosted by EBAS at NILU, Part of DOI: <https://doi.org/10.48597/638J-E6YQ>

Elizaga, F., Lambas, M., EMEP, 2010, Inorganics in air and particle phase at San Pablo de los Montes, data hosted by EBAS at NILU, Part of DOI: <https://doi.org/10.48597/XXT8-P5DA>

Elizaga, F., Lambas, M., EMEP, 2010, PM mass at Barcarrota, data hosted by EBAS at NILU, Part of DOI: <https://doi.org/10.48597/J45K-7R8Y>

Elizaga, F., Lambas, M., EMEP, 2010, PM mass at Cabo de Creus, data hosted by EBAS at NILU, Part of DOI: <https://doi.org/10.48597/SZ42-YAXC>

Elizaga, F., Lambas, M., EMEP, 2010, PM mass at Campisabalos, data hosted by EBAS at NILU, Part of DOI: <https://doi.org/10.48597/NK59-VAUG>

Elizaga, F., Lambas, M., EMEP, 2010, PM mass at Els Torms, data hosted by EBAS at NILU, Part of DOI: <https://doi.org/10.48597/J968-M6GC>

Elizaga, F., Lambas, M., EMEP, 2010, PM mass at O Saviñao, data hosted by EBAS at NILU, Part of DOI: <https://doi.org/10.48597/2BD7-A4SX>

Elizaga, F., Lambas, M., EMEP, 2010, PM mass at Penausende, data hosted by EBAS at NILU, Part of DOI: <https://doi.org/10.48597/KNZZ-B5UP>

Elizaga, F., Lambas, M., EMEP, 2010, Pm10\_mass at Zarra, data hosted by EBAS at NILU, Part of DOI: <https://doi.org/10.48597/YKFQ-ZBEA>

Elizaga, F., Lambas, M., EMEP, 2010, Pm25\_mass at Barcarrota, data hosted by EBAS at NILU, Part of DOI: <https://doi.org/10.48597/JBPE-37YP>

Elizaga, F., Lambas, M., EMEP, 2010, Pm25\_mass at Cabo de Creus, data hosted by EBAS at NILU, Part of DOI: <https://doi.org/10.48597/NVCW-3FP2>

Elizaga, F., Lambas, M., EMEP, 2010, Pm25\_mass at Campisabalos, data hosted by EBAS at NILU, Part of DOI: <https://doi.org/10.48597/K352-7M6T>

Elizaga, F., Lambas, M., EMEP, 2010, Pm25\_mass at Els Torms, data hosted by EBAS at NILU, Part of DOI: <https://doi.org/10.48597/AEW6-7SDF>

Elizaga, F., Lambas, M., EMEP, 2010, Pm25\_mass at O Saviñao, data hosted by EBAS at NILU, Part of DOI: <https://doi.org/10.48597/M7XQ-4G4H>

Elizaga, F., Lambas, M., EMEP, 2010, Pm25\_mass at Penausende, data hosted by EBAS at NILU, Part of DOI: <https://doi.org/10.48597/RVFU-D2S7>

Elizaga, F., Lambas, M., EMEP, 2010, Pm25\_mass at San Pablo de los Montes, data hosted by EBAS at NILU, Part of DOI: <https://doi.org/10.48597/Y54T-ETZB>

Elizaga, F., Lambas, M., EMEP, 2010, Pm25\_mass at Zarra, data hosted by EBAS at NILU, Part of DOI: <https://doi.org/10.48597/PQYV-PB4R>

Elizaga, F., Lambas, M., EMEP, 2010, Sulphate\_total at Campisabalos, data hosted by EBAS at NILU, Part of DOI: <https://doi.org/10.48597/T5KM-WQHS>

Elizaga, F., Lambas, M., EMEP, 2011, Inorganics in air and particle phase at Mahón, data hosted by EBAS at NILU, Part of DOI: <https://doi.org/10.48597/HT8P-QUKM>

Elizaga, F., Lambas, M., EMEP, 2011, Pm10\_mass at Campisabalos, data hosted by EBAS at NILU, Part of DOI: <https://doi.org/10.48597/RSTY-V7MF>

Elizaga, F., Lambas, M., EMEP, 2011, Pm10\_mass at O Saviñao, data hosted by EBAS at NILU, Part of DOI: <https://doi.org/10.48597/4NMA-MGQW>

Elizaga, F., Lambas, M., EMEP, 2011, Pm10\_mass at Penausende, data hosted by EBAS at NILU, Part of DOI: <https://doi.org/10.48597/2MMK-TKAP>

Elizaga, F., Lambas, M., EMEP, 2011, Pm10\_mass at Zarra, data hosted by EBAS at NILU, Part of DOI: <https://doi.org/10.48597/KGGA-X9D4>

Elizaga, F., Lambas, M., EMEP, 2011, Sodium at Campisabalos, data hosted by EBAS at NILU, Part of DOI: <https://doi.org/10.48597/V2RC-WTNC>

Elizaga, F., Lambas, M., EMEP, 2014, Ammonium at Campisabalos, data hosted by EBAS at NILU, Part of DOI: <https://doi.org/10.48597/XPGW-VKP3>

Elizaga, F., Lambas, M., EMEP, 2014, Inorganics in air and particle phase at Barcarrota, data hosted by EBAS at NILU, Part of DOI: <https://doi.org/10.48597/FVR8-YZWY>

Elizaga, F., Lambas, M., EMEP, 2014, Inorganics in air and particle phase at Cabo de Creus, data hosted by EBAS at NILU, Part of DOI: <https://doi.org/10.48597/Q8D8-DEWM>

Elizaga, F., Lambas, M., EMEP, 2014, Inorganics in air and particle phase at Campisabalos, data hosted by EBAS at NILU, Part of DOI: <https://doi.org/10.48597/BBPJ-ZFDY>

Elizaga, F., Lambas, M., EMEP, 2014, Inorganics in air and particle phase at Campisabalos, data hosted by EBAS at NILU, Part of DOI: <https://doi.org/10.48597/HXPU-UBTR>

Elizaga, F., Lambas, M., EMEP, 2014, Inorganics in air and particle phase at Campisabalos, data hosted by EBAS at NILU, Part of DOI: <https://doi.org/10.48597/TVZD-HRTR>

Elizaga, F., Lambas, M., EMEP, 2014, Inorganics in air and particle phase at Doñana, data hosted by EBAS at NILU, Part of DOI: <https://doi.org/10.48597/638J-E6YQ>

Elizaga, F., Lambas, M., EMEP, 2014, Inorganics in air and particle phase at Els Torms, data hosted by EBAS at NILU, Part of DOI: <https://doi.org/10.48597/5D2U-F5QZ>

Elizaga, F., Lambas, M., EMEP, 2014, Inorganics in air and particle phase at O Saviñao, data hosted by EBAS at NILU, Part of DOI: <https://doi.org/10.48597/HGPX-V2XY>

Elizaga, F., Lambas, M., EMEP, 2014, Inorganics in air and particle phase at Penausende, data hosted by EBAS at NILU, Part of DOI: <https://doi.org/10.48597/8DEG-YMK9>

Elizaga, F., Lambas, M., EMEP, 2014, Inorganics in air and particle phase at San Pablo de los Montes, data hosted by EBAS at NILU, Part of DOI: <https://doi.org/10.48597/XXT8-P5DA>

Elizaga, F., Lambas, M., EMEP, 2014, Inorganics in air and particle phase at Víznar, data hosted by EBAS at NILU, Part of DOI: <https://doi.org/10.48597/277C-PWEA>

Elizaga, F., Lambas, M., EMEP, 2014, Inorganics in air and particle phase at Zarra, data hosted by EBAS at NILU, Part of DOI: <https://doi.org/10.48597/PYKH-MKH7>

Elizaga, F., Lambas, M., EMEP, 2014, OC/EC at Campisabalos, data hosted by EBAS at NILU, Part of DOI: <https://doi.org/10.48597/7T3Z-R92U>

Elizaga, F., Lambas, M., EMEP, 2014, PM mass at Barcarrota, data hosted by EBAS at NILU, Part of DOI: <https://doi.org/10.48597/J45K-7R8Y>

Elizaga, F., Lambas, M., EMEP, 2014, PM mass at Cabo de Creus, data hosted by EBAS at NILU, Part of DOI: <https://doi.org/10.48597/SZ42-YAXC>

Elizaga, F., Lambas, M., EMEP, 2014, PM mass at Campisabalos, data hosted by EBAS at NILU, Part of DOI: <https://doi.org/10.48597/NK59-VAUG>

Elizaga, F., Lambas, M., EMEP, 2014, PM mass at Els Torms, data hosted by EBAS at NILU, Part of DOI: <https://doi.org/10.48597/J968-M6GC>

Elizaga, F., Lambas, M., EMEP, 2014, PM mass at O Saviñao, data hosted by EBAS at NILU, Part of DOI: <https://doi.org/10.48597/2BD7-A4SX>

Elizaga, F., Lambas, M., EMEP, 2014, PM mass at Penausende, data hosted by EBAS at NILU, Part of DOI: <https://doi.org/10.48597/KNZZ-B5UP>

Elizaga, F., Lambas, M., EMEP, 2014, Pm10\_mass at Zarra, data hosted by EBAS at NILU, Part of DOI: <https://doi.org/10.48597/YKfq-ZBEA>

Elizaga, F., Lambas, M., EMEP, 2014, Pm25\_mass at San Pablo de los Montes, data hosted by EBAS at NILU, Part of DOI: <https://doi.org/10.48597/Y54T-ETZB>

Elizaga, F., Lambas, M., EMEP, 2014, Pm25\_mass at Viznar, data hosted by EBAS at NILU, Part of DOI: <https://doi.org/10.48597/DZKP-B9D4>

Elizaga, F., Lambas, M., EMEP, 2014, Pm25\_mass at Zarra, data hosted by EBAS at NILU, Part of DOI: <https://doi.org/10.48597/PQYV-PB4R>

Elizaga, F., Lambas, M., EMEP, 2014, Sulphate\_total at Campisabalos, data hosted by EBAS at NILU, Part of DOI: <https://doi.org/10.48597/T5KM-WQHS>

Ellermann, T., CAMPAIGN, EMEP, 2009, OC/EC at Lille Valby, data hosted by EBAS at NILU, Part of DOI: <https://doi.org/10.48597/ZQZH-EFFH>

Eve, U., EMEP, 2011, Pm10\_mass at Lahemaa, data hosted by EBAS at NILU, Part of DOI: <https://doi.org/10.48597/CYEN-A9BM>

Eve, U., EMEP, 2015, Pm25\_mass at Lahemaa, data hosted by EBAS at NILU, Part of DOI: <https://doi.org/10.48597/8QWS-2E3J>

Eve, U., EMEP, 2015, Pm25\_mass at Vilsandi, data hosted by EBAS at NILU, Part of DOI: <https://doi.org/10.48597/CPH8-RB2X>

Facchini, M., CAMPAIGN, EMEP, 2004, OC/EC and pm10\_mass at ISAC Bologna, data hosted by EBAS at NILU, Part of DOI: <https://doi.org/10.48597/S4HZ-8TVQ>

Ferenczi, Z., EMEP, 2009, Pm10\_mass at K-puszt, data hosted by EBAS at NILU, Part of DOI: <https://doi.org/10.48597/VGX7-J4Y9>

Ferenczi, Z., EMEP, 2014, Pm10\_mass at K-puszt, data hosted by EBAS at NILU, Part of DOI: <https://doi.org/10.48597/VGX7-J4Y9>

Ferenczi, Z., EMEP, 2015, Pm10\_mass at K-puszt, data hosted by EBAS at NILU, Part of DOI: <https://doi.org/10.48597/GG7H-Z795>

Ferenczi, Z., EMEP, 2015, Pm10\_mass at K-puszt, data hosted by EBAS at NILU, Part of DOI: <https://doi.org/10.48597/KKD7-88ME>

Ferenczi, Z., EMEP, 2015, Pm25\_mass at K-puszt, data hosted by EBAS at NILU, Part of DOI: <https://doi.org/10.48597/EFH2-NWV8>

Ferenczi, Z., EMEP, 2015, Pm25\_mass at K-puszt, data hosted by EBAS at NILU, Part of DOI: <https://doi.org/10.48597/KCBM-UQHW>

Ferenczi, Z., Labancz, K., EMEP, 2018, Pm10\_mass at K-puszt, data hosted by EBAS at NILU, Part of DOI: <https://doi.org/10.48597/UEVT-BDEW>

Ferenczi, Z., Labancz, K., EMEP, 2019, PM mass at Farkasfa, data hosted by EBAS at NILU, Part of DOI: <https://doi.org/10.48597/DFRA-EU3Y>, <https://doi.org/10.48597/R7K7-XX83>

Ferenczi, Z., Labancz, K., EMEP, 2019, Pm10\_mass at K-puszt, data hosted by EBAS at NILU, Part of DOI: <https://doi.org/10.48597/UEVT-BDEW>

Ferenczi, Z., Labancz, K., EMEP, 2020, Pm10\_mass at K-puszt, data hosted by EBAS at NILU, Part of DOI: <https://doi.org/10.48597/6WSA-JPC3>

Ferenczi, Z., Labancz, K., EMEP, 2020, Pm25\_mass at K-puszt, data hosted by EBAS at NILU, Part of DOI: <https://doi.org/10.48597/G5YX-7ZFW>



Ferenczi, Z., Labancz, K., EMEP, 2021, Pm10\_mass at K-pusztá, data hosted by EBAS at NILU, Part of DOI: <https://doi.org/10.48597/6WSA-JPC3>

Ferenczi, Z., Labancz, K., EMEP, 2021, Pm25\_mass at K-pusztá, data hosted by EBAS at NILU, Part of DOI: <https://doi.org/10.48597/G5YX-7ZFW>

Fernandez Monistrol, J., EMEP, 2023, Pm10\_mass at Barcarrota, data hosted by EBAS at NILU, Part of DOI: <https://doi.org/10.48597/MYPJ-29MV>

Fernandez Monistrol, J., EMEP, 2023, Pm10\_mass at Cabo de Creus, data hosted by EBAS at NILU, Part of DOI: <https://doi.org/10.48597/Z2F4-XTA4>

Fernandez Monistrol, J., EMEP, 2023, Pm10\_mass at Campisabalos, data hosted by EBAS at NILU, Part of DOI: <https://doi.org/10.48597/YTKF-XG2C>

Fernandez Monistrol, J., EMEP, 2023, Pm10\_mass at Doñana, data hosted by EBAS at NILU, Part of DOI: <https://doi.org/10.48597/BS62-RSZK>

Fernandez Monistrol, J., EMEP, 2023, Pm10\_mass at Els Torms, data hosted by EBAS at NILU, Part of DOI: <https://doi.org/10.48597/7N6Z-GDYH>

Fernandez Monistrol, J., EMEP, 2023, Pm10\_mass at Mahón, data hosted by EBAS at NILU, Part of DOI: <https://doi.org/10.48597/E5E7-UEYG>

Fernandez Monistrol, J., EMEP, 2023, Pm10\_mass at Niembro, data hosted by EBAS at NILU, Part of DOI: <https://doi.org/10.48597/HQ8U-ZJQC>

Fernandez Monistrol, J., EMEP, 2023, Pm10\_mass at Noia, data hosted by EBAS at NILU, Part of DOI: <https://doi.org/10.48597/DHTA-NU9N>

Fernandez Monistrol, J., EMEP, 2023, Pm10\_mass at O Saviñao, data hosted by EBAS at NILU, Part of DOI: <https://doi.org/10.48597/A2AQ-JN4Z>

Fernandez Monistrol, J., EMEP, 2023, Pm10\_mass at San Pablo de los Montes, data hosted by EBAS at NILU, Part of DOI: <https://doi.org/10.48597/B4SK-KDFX>

Fernandez Monistrol, J., EMEP, 2023, Pm10\_mass at Zarra, data hosted by EBAS at NILU, Part of DOI: <https://doi.org/10.48597/G52E-XRKH>

Fernandez Monistrol, J., EMEP, 2023, Pm25\_mass at Barcarrota, data hosted by EBAS at NILU, Part of DOI: <https://doi.org/10.48597/VSKK-W2JP>

Fernandez Monistrol, J., EMEP, 2023, Pm25\_mass at Cabo de Creus, data hosted by EBAS at NILU, Part of DOI: <https://doi.org/10.48597/HG84-ZHG5>

Fernandez Monistrol, J., EMEP, 2023, Pm25\_mass at Campisabalos, data hosted by EBAS at NILU, Part of DOI: <https://doi.org/10.48597/899K-ASW5>

Fernandez Monistrol, J., EMEP, 2023, Pm25\_mass at Els Torms, data hosted by EBAS at NILU, Part of DOI: <https://doi.org/10.48597/Z38K-GRCU>

Fernandez Monistrol, J., EMEP, 2023, Pm25\_mass at Mahón, data hosted by EBAS at NILU, Part of DOI: <https://doi.org/10.48597/UGZX-46EQ>

Fernandez Monistrol, J., EMEP, 2023, Pm25\_mass at Niembro, data hosted by EBAS at NILU, Part of DOI: <https://doi.org/10.48597/JK8X-MPN8>

Fernandez Monistrol, J., EMEP, 2023, Pm25\_mass at O Saviñao, data hosted by EBAS at NILU, Part of DOI: <https://doi.org/10.48597/J4FP-R3EA>

Fernandez Monistrol, J., EMEP, 2023, Pm25\_mass at Penausende, data hosted by EBAS at NILU, Part of DOI: <https://doi.org/10.48597/NUKP-SWRM>

Fernandez Monistrol, J., EMEP, 2023, Pm25\_mass at San Pablo de los Montes, data hosted by EBAS at NILU, Part of DOI: <https://doi.org/10.48597/8BYU-QW7W>

Fernandez Monistrol, J., EMEP, 2023, Pm25\_mass at Vízcar, data hosted by EBAS at NILU, Part of DOI: <https://doi.org/10.48597/R966-6W7U>

Fernandez Monistrol, J., EMEP, 2023, Pm25\_mass at Zarra, data hosted by EBAS at NILU, Part of DOI: <https://doi.org/10.48597/M26X-79QY>

Fernandez, M., CAMP, EMEP, 2021, Ammonium at Niembro, data hosted by EBAS at NILU, Part of DOI: <https://doi.org/10.48597/NZH4-Y982>

Fernández, M., CAMP, EMEP, 2021, Ammonium at Niembro, data hosted by EBAS at NILU, Part of DOI: <https://doi.org/10.48597/NZH4-Y982>

Fernandez, M., CAMP, EMEP, 2021, Inorganics in air and particle phase at Doñana, data hosted by EBAS at NILU, Part of DOI: <https://doi.org/10.48597/96E8-8MEX>, <https://doi.org/10.48597/KN5C-ZRQ9>, <https://doi.org/10.48597/FFSN-Y9D9>

Fernández, M., CAMP, EMEP, 2021, Inorganics in air and particle phase at Doñana, data hosted by EBAS at NILU, Part of DOI: <https://doi.org/10.48597/96E8-8MEX>, <https://doi.org/10.48597/KN5C-ZRQ9>, <https://doi.org/10.48597/FFSN-Y9D9>

Fernández, M., CAMP, EMEP, 2021, Inorganics in air and particle phase at Niembro, data hosted by EBAS at NILU, Part of DOI: <https://doi.org/10.48597/2S4P-YBPQ>, <https://doi.org/10.48597/FCV7-FGQ7>, <https://doi.org/10.48597/NQTQ-X3K2>, <https://doi.org/10.48597/68T3-EXSF>

Fernandez, M., CAMP, EMEP, 2021, Inorganics in air and particle phase at Niembro, data hosted by EBAS at NILU, Part of DOI: <https://doi.org/10.48597/2S4P-YBPQ>, <https://doi.org/10.48597/NJTP-MJWW>, <https://doi.org/10.48597/FCV7-FGQ7>, <https://doi.org/10.48597/NQTQ-X3K2>, <https://doi.org/10.48597/68T3-EXSF>

Fernandez, M., CAMP, EMEP, 2021, Inorganics in air and particle phase at Niembro, data hosted by EBAS at NILU, Part of DOI: <https://doi.org/10.48597/KAND-TCRG>, <https://doi.org/10.48597/455K-K35V>, <https://doi.org/10.48597/7FWV-AT6J>, <https://doi.org/10.48597/PPSK-XJJY>, <https://doi.org/10.48597/T98A-K3HK>

Fernández, M., CAMP, EMEP, 2021, Inorganics in air and particle phase at Niembro, data hosted by EBAS at NILU, Part of DOI: <https://doi.org/10.48597/KAND-TCRG>, <https://doi.org/10.48597/7FWV-AT6J>, <https://doi.org/10.48597/PPSK-XJJY>, <https://doi.org/10.48597/T98A-K3HK>

Fernandez, M., CAMP, EMEP, 2021, Inorganics in air and particle phase at Noia, data hosted by EBAS at NILU, Part of DOI: <https://doi.org/10.48597/GWYP-6GFV>, <https://doi.org/10.48597/DHGS-A3UP>, <https://doi.org/10.48597/B242-H84H>

Fernández, M., CAMP, EMEP, 2021, Inorganics in air and particle phase at Noia, data hosted by EBAS at NILU, Part of DOI: <https://doi.org/10.48597/GWYP-6GFV>, <https://doi.org/10.48597/DHGS-A3UP>, <https://doi.org/10.48597/B242-H84H>

Fernandez, M., CAMP, EMEP, 2021, Pm25\_mass at Niembro, data hosted by EBAS at NILU, Part of DOI: <https://doi.org/10.48597/GNTJ-CEEH>

Fernández, M., CAMP, EMEP, 2021, Pm25\_mass at Niembro, data hosted by EBAS at NILU, Part of DOI: <https://doi.org/10.48597/GNTJ-CEEH>

Fernandez, M., CAMP, EMEP, 2022, Ammonium at Niembro, data hosted by EBAS at NILU, Part of DOI: <https://doi.org/10.48597/G2YA-YQFK>

Fernandez, M., CAMP, EMEP, 2022, Inorganics in air and particle phase at Doñana, data hosted by EBAS at NILU, Part of DOI: <https://doi.org/10.48597/D8WK-EN2Q>, <https://doi.org/10.48597/FFSN-Y9D9>

Fernandez, M., CAMP, EMEP, 2022, Inorganics in air and particle phase at Niembro, data hosted by EBAS at NILU, Part of DOI: <https://doi.org/10.48597/DYUS-8UKD>, <https://doi.org/10.48597/T98A-K3HK>

Fernandez, M., CAMP, EMEP, 2022, Inorganics in air and particle phase at Niembro, data hosted by EBAS at NILU, Part of DOI: <https://doi.org/10.48597/J52G-YS8J>, <https://doi.org/10.48597/NJTP-MJWW>

Fernandez, M., CAMP, EMEP, 2022, Inorganics in air and particle phase at Noia, data hosted by EBAS at NILU, Part of DOI: <https://doi.org/10.48597/FFGQ-93N5>, <https://doi.org/10.48597/B242-H84H>

Fernandez, M., CAMP, EMEP, 2022, Pm25\_mass at Niembro, data hosted by EBAS at NILU, Part of DOI: <https://doi.org/10.48597/GNTJ-CEEH>

Fernandez, M., EMEP, 2021, Ammonium at Campisabalos, data hosted by EBAS at NILU, Part of DOI: <https://doi.org/10.48597/U3XV-GU5B>

Fernández, M., EMEP, 2021, Ammonium at Campisabalos, data hosted by EBAS at NILU, Part of DOI: <https://doi.org/10.48597/U3XV-GU5B>

Fernandez, M., EMEP, 2021, Ammonium at Els Torms, data hosted by EBAS at NILU, Part of DOI: <https://doi.org/10.48597/BXNN-JBJD>

Fernández, M., EMEP, 2021, Ammonium at Els Torms, data hosted by EBAS at NILU, Part of DOI: <https://doi.org/10.48597/BXNN-JBJD>

Fernandez, M., EMEP, 2021, Ammonium at San Pablo de los Montes, data hosted by EBAS at NILU, Part of DOI: <https://doi.org/10.48597/BCPF-G9T4>

Fernández, M., EMEP, 2021, Ammonium at San Pablo de los Montes, data hosted by EBAS at NILU, Part of DOI: <https://doi.org/10.48597/BCPF-G9T4>

Fernandez, M., EMEP, 2021, Ammonium at Víznar, data hosted by EBAS at NILU, Part of DOI: <https://doi.org/10.48597/YMQ5-FH3K>

Fernández, M., EMEP, 2021, Ammonium at Víznar, data hosted by EBAS at NILU, Part of DOI: <https://doi.org/10.48597/YMQ5-FH3K>

Fernandez, M., EMEP, 2021, Inorganics in air and particle phase at Barcarrota, data hosted by EBAS at NILU, Part of DOI: <https://doi.org/10.48597/7UV3-PDJS>, <https://doi.org/10.48597/H6RE-QJCB>, <https://doi.org/10.48597/Y8HZ-G9RS>

Fernández, M., EMEP, 2021, Inorganics in air and particle phase at Barcarrota, data hosted by EBAS at NILU, Part of DOI: <https://doi.org/10.48597/7UV3-PDJS>, <https://doi.org/10.48597/H6RE-QJCB>, <https://doi.org/10.48597/Y8HZ-G9RS>

Fernandez, M., EMEP, 2021, Inorganics in air and particle phase at Cabo de Creus, data hosted by EBAS at NILU, Part of DOI: <https://doi.org/10.48597/WK3P-W5BY>, <https://doi.org/10.48597/RH38-RN4E>, <https://doi.org/10.48597/NKZB-QC7X>

Fernández, M., EMEP, 2021, Inorganics in air and particle phase at Cabo de Creus, data hosted by EBAS at NILU, Part of DOI: <https://doi.org/10.48597/WK3P-W5BY>, <https://doi.org/10.48597/RH38-RN4E>, <https://doi.org/10.48597/NKZB-QC7X>

Fernandez, M., EMEP, 2021, Inorganics in air and particle phase at Campisabalos, data hosted by EBAS at NILU, Part of DOI: <https://doi.org/10.48597/BUJE-5NW8>, <https://doi.org/10.48597/4NN7-GZHV>, <https://doi.org/10.48597/QHS3-EVA6>, <https://doi.org/10.48597/HAPP-X2WN>, <https://doi.org/10.48597/8DC4-666F>

Fernández, M., EMEP, 2021, Inorganics in air and particle phase at Campisabalos, data hosted by EBAS at NILU, Part of DOI: <https://doi.org/10.48597/BUJE-5NW8>, <https://doi.org/10.48597/QHS3-EVA6>, <https://doi.org/10.48597/HAPP-X2WN>, <https://doi.org/10.48597/8DC4-666F>

Fernández, M., EMEP, 2021, Inorganics in air and particle phase at Campisabalos, data hosted by EBAS at NILU, Part of DOI: <https://doi.org/10.48597/HEBM-8TJR>, <https://doi.org/10.48597/6ZN8-VTZD>, <https://doi.org/10.48597/MQZK-6KTT>, <https://doi.org/10.48597/H75V-DN8Z>

Fernandez, M., EMEP, 2021, Inorganics in air and particle phase at Campisabalos, data hosted by EBAS at NILU, Part of DOI: <https://doi.org/10.48597/HEBM-8TJR>, <https://doi.org/10.48597/8S4A-VDZ6>, <https://doi.org/10.48597/6ZN8-VTZD>, <https://doi.org/10.48597/MQZK-6KTT>, <https://doi.org/10.48597/H75V-DN8Z>

Fernández, M., EMEP, 2021, Inorganics in air and particle phase at Els Torms, data hosted by EBAS at NILU, Part of DOI: <https://doi.org/10.48597/JR6D-F5WF>, <https://doi.org/10.48597/2FWB-E39R>, <https://doi.org/10.48597/FWCM-VWJ4>, <https://doi.org/10.48597/5E2C-M2KD>

Fernandez, M., EMEP, 2021, Inorganics in air and particle phase at Els Torms, data hosted by EBAS at NILU, Part of DOI: <https://doi.org/10.48597/JR6D-F5WF>, <https://doi.org/10.48597/NMH6-SBYT>, <https://doi.org/10.48597/2FWB-E39R>, <https://doi.org/10.48597/FWCM-VWJ4>, <https://doi.org/10.48597/5E2C-M2KD>

Fernández, M., EMEP, 2021, Inorganics in air and particle phase at Els Torms, data hosted by EBAS at NILU, Part of DOI: <https://doi.org/10.48597/Q6ZT-GJU7>, <https://doi.org/10.48597/C6XJ-6E4J>, <https://doi.org/10.48597/7DJ8-7A5D>, <https://doi.org/10.48597/H3AD-HWFF>

Fernandez, M., EMEP, 2021, Inorganics in air and particle phase at Els Torms, data hosted by EBAS at NILU, Part of DOI: <https://doi.org/10.48597/Q6ZT-GJU7>, <https://doi.org/10.48597/PTHU-NFXP>, <https://doi.org/10.48597/C6XJ-6E4J>, <https://doi.org/10.48597/7DJ8-7A5D>, <https://doi.org/10.48597/H3AD-HWFF>

Fernandez, M., EMEP, 2021, Inorganics in air and particle phase at Mahón, data hosted by EBAS at NILU, Part of DOI: <https://doi.org/10.48597/NA6P-E4TU>, <https://doi.org/10.48597/R7NS-DYKS>, <https://doi.org/10.48597/69QD-B4VW>

Fernández, M., EMEP, 2021, Inorganics in air and particle phase at Mahón, data hosted by EBAS at NILU, Part of DOI: <https://doi.org/10.48597/NA6P-E4TU>, <https://doi.org/10.48597/R7NS-DYKS>, <https://doi.org/10.48597/69QD-B4VW>

Fernandez, M., EMEP, 2021, Inorganics in air and particle phase at O Saviñao, data hosted by EBAS at NILU, Part of DOI: <https://doi.org/10.48597/AK43-C68Z>, <https://doi.org/10.48597/F9A6-9YXQ>, <https://doi.org/10.48597/NTTZ-HVVG>

Fernández, M., EMEP, 2021, Inorganics in air and particle phase at O Saviñao, data hosted by EBAS at NILU, Part of DOI: <https://doi.org/10.48597/AK43-C68Z>, <https://doi.org/10.48597/F9A6-9YXQ>, <https://doi.org/10.48597/NTTZ-HVVG>

Fernandez, M., EMEP, 2021, Inorganics in air and particle phase at Penausende, data hosted by EBAS at NILU, Part of DOI: <https://doi.org/10.48597/TDHZ-8ARX>, <https://doi.org/10.48597/KXPD-D53P>, <https://doi.org/10.48597/5SNF-45YH>

Fernández, M., EMEP, 2021, Inorganics in air and particle phase at Penausende, data hosted by EBAS at NILU, Part of DOI: <https://doi.org/10.48597/TDHZ-8ARX>, <https://doi.org/10.48597/KXPD-D53P>, <https://doi.org/10.48597/5SNF-45YH>

Fernández, M., EMEP, 2021, Inorganics in air and particle phase at San Pablo de los Montes, data hosted by EBAS at NILU, Part of DOI: <https://doi.org/10.48597/HMTJ-QQAJ>, <https://doi.org/10.48597/9A5N-6ZSR>, <https://doi.org/10.48597/TKCY-YSXN>, <https://doi.org/10.48597/QENJ-TMWE>

Fernandez, M., EMEP, 2021, Inorganics in air and particle phase at San Pablo de los Montes, data hosted by EBAS at NILU, Part of DOI: <https://doi.org/10.48597/HMTJ-QQAJ>, <https://doi.org/10.48597/RVNJ-CZH5>, <https://doi.org/10.48597/9A5N-6ZSR>, <https://doi.org/10.48597/TKCY-YSXN>, <https://doi.org/10.48597/QENJ-TMWE>

Fernandez, M., EMEP, 2021, Inorganics in air and particle phase at San Pablo de los Montes, data hosted by EBAS at NILU, Part of DOI: <https://doi.org/10.48597/SV2W-758J>, <https://doi.org/10.48597/RVVR-EXR2>, <https://doi.org/10.48597/WS53-NRMN>, <https://doi.org/10.48597/ZKNT-9ZWK>, <https://doi.org/10.48597/HCKR-NWDR>

Fernández, M., EMEP, 2021, Inorganics in air and particle phase at San Pablo de los Montes, data hosted by EBAS at NILU, Part of DOI: <https://doi.org/10.48597/SV2W-758J>, <https://doi.org/10.48597/WS53-NRMN>, <https://doi.org/10.48597/ZKNT-9ZWK>, <https://doi.org/10.48597/HCKR-NWDR>

Fernández, M., EMEP, 2021, Inorganics in air and particle phase at Víznar, data hosted by EBAS at NILU, Part of DOI: <https://doi.org/10.48597/2ZAT-QDJS>, <https://doi.org/10.48597/GPPU-PU2J>, <https://doi.org/10.48597/8CNE-E6J9>, <https://doi.org/10.48597/WS82-JRGE>

Fernandez, M., EMEP, 2021, Inorganics in air and particle phase at Víznar, data hosted by EBAS at NILU, Part of DOI: <https://doi.org/10.48597/2ZAT-QDJS>, <https://doi.org/10.48597/YGTE-JJNX>, <https://doi.org/10.48597/GPPU-PU2J>, <https://doi.org/10.48597/8CNE-E6J9>, <https://doi.org/10.48597/WS82-JRGE>

Fernández, M., EMEP, 2021, Inorganics in air and particle phase at Víznar, data hosted by EBAS at NILU, Part of DOI: <https://doi.org/10.48597/CDDW-YGVH>, <https://doi.org/10.48597/W3ZP-KC2E>, <https://doi.org/10.48597/Y3ST-9NEK>, <https://doi.org/10.48597/PJHU-3DBH>

Fernandez, M., EMEP, 2021, Inorganics in air and particle phase at Víznar, data hosted by EBAS at NILU, Part of DOI: <https://doi.org/10.48597/CDDW-YGVH>, <https://doi.org/10.48597/XY92-4JCW>, <https://doi.org/10.48597/W3ZP-KC2E>, <https://doi.org/10.48597/Y3ST-9NEK>, <https://doi.org/10.48597/PJHU-3DBH>

Fernandez, M., EMEP, 2021, Inorganics in air and particle phase at Zarra, data hosted by EBAS at NILU, Part of DOI: <https://doi.org/10.48597/NPX5-8FHQ>, <https://doi.org/10.48597/XSHH-B35K>, <https://doi.org/10.48597/PEEX-HBW6>, <https://doi.org/10.48597/BHJ5-WZ2C>, <https://doi.org/10.48597/ABKR-3D74>

Fernandez, M., EMEP, 2021, Inorganics in air and particle phase at Zarra, data hosted by EBAS at NILU, Part of DOI: <https://doi.org/10.48597/XRUX-W6YS>, <https://doi.org/10.48597/5E9Q-DBND>, <https://doi.org/10.48597/AG79-463Y>

Fernández, M., EMEP, 2021, Inorganics in air and particle phase at Zarra, data hosted by EBAS at NILU, Part of DOI: <https://doi.org/10.48597/XRUX-W6YS>, <https://doi.org/10.48597/5E9Q-DBND>, <https://doi.org/10.48597/AG79-463Y>

Fernandez, M., EMEP, 2021, Pm25\_mass at Barcarrota, data hosted by EBAS at NILU, Part of DOI: <https://doi.org/10.48597/4YJ8-C3YC>

Fernández, M., EMEP, 2021, Pm25\_mass at Barcarrota, data hosted by EBAS at NILU, Part of DOI: <https://doi.org/10.48597/4YJ8-C3YC>

Fernandez, M., EMEP, 2021, Pm25\_mass at Cabo de Creus, data hosted by EBAS at NILU, Part of DOI: <https://doi.org/10.48597/YKA7-UKYR>

Fernández, M., EMEP, 2021, Pm25\_mass at Cabo de Creus, data hosted by EBAS at NILU, Part of DOI: <https://doi.org/10.48597/YKA7-UKYR>

Fernandez, M., EMEP, 2021, Pm25\_mass at Campisabalos, data hosted by EBAS at NILU, Part of DOI: <https://doi.org/10.48597/W8RP-2EDN>

Fernández, M., EMEP, 2021, Pm25\_mass at Campisabalos, data hosted by EBAS at NILU, Part of DOI: <https://doi.org/10.48597/W8RP-2EDN>

Fernandez, M., EMEP, 2021, Pm25\_mass at Els Torms, data hosted by EBAS at NILU, Part of DOI: <https://doi.org/10.48597/6D3A-TX5M>

Fernández, M., EMEP, 2021, Pm25\_mass at Els Torms, data hosted by EBAS at NILU, Part of DOI: <https://doi.org/10.48597/6D3A-TX5M>

Fernandez, M., EMEP, 2021, Pm25\_mass at Mahón, data hosted by EBAS at NILU, Part of DOI: <https://doi.org/10.48597/GD6H-QSXX>

Fernández, M., EMEP, 2021, Pm25\_mass at Mahón, data hosted by EBAS at NILU, Part of DOI: <https://doi.org/10.48597/GD6H-QSXX>

Fernandez, M., EMEP, 2021, Pm25\_mass at O Saviñao, data hosted by EBAS at NILU, Part of DOI: <https://doi.org/10.48597/59E9-84U3>

Fernández, M., EMEP, 2021, Pm25\_mass at O Saviñao, data hosted by EBAS at NILU, Part of DOI: <https://doi.org/10.48597/59E9-84U3>

Fernandez, M., EMEP, 2021, Pm25\_mass at Penausende, data hosted by EBAS at NILU, Part of DOI: <https://doi.org/10.48597/FZPZ-TBK4>

Fernández, M., EMEP, 2021, Pm25\_mass at Penausende, data hosted by EBAS at NILU, Part of DOI: <https://doi.org/10.48597/FZPZ-TBK4>

Fernandez, M., EMEP, 2021, Pm25\_mass at San Pablo de los Montes, data hosted by EBAS at NILU, Part of DOI: <https://doi.org/10.48597/8JY6-R22T>

Fernández, M., EMEP, 2021, Pm25\_mass at San Pablo de los Montes, data hosted by EBAS at NILU, Part of DOI: <https://doi.org/10.48597/8JY6-R22T>

Fernandez, M., EMEP, 2021, Pm25\_mass at Víznar, data hosted by EBAS at NILU, Part of DOI: <https://doi.org/10.48597/9H9P-MFJ8>

Fernández, M., EMEP, 2021, Pm25\_mass at Víznar, data hosted by EBAS at NILU, Part of DOI: <https://doi.org/10.48597/9H9P-MFJ8>

Fernandez, M., EMEP, 2021, Pm25\_mass at Zarra, data hosted by EBAS at NILU, Part of DOI: <https://doi.org/10.48597/YYBT-BM2E>

Fernández, M., EMEP, 2021, Pm25\_mass at Zarra, data hosted by EBAS at NILU, Part of DOI: <https://doi.org/10.48597/YYBT-BM2E>

Fernandez, M., EMEP, 2022, Ammonium at Campisabalos, data hosted by EBAS at NILU, Part of DOI: <https://doi.org/10.48597/Z6NF-8BFR>

Fernandez, M., EMEP, 2022, Ammonium at Els Torms, data hosted by EBAS at NILU, Part of DOI: <https://doi.org/10.48597/7UQK-MHPM>

Fernandez, M., EMEP, 2022, Ammonium at Víznar, data hosted by EBAS at NILU, Part of DOI: <https://doi.org/10.48597/37GA-PV96>

Fernandez, M., EMEP, 2022, Inorganics in air and particle phase at Barcarrota, data hosted by EBAS at NILU, Part of DOI: <https://doi.org/10.48597/U86A-9XY7>, <https://doi.org/10.48597/Y8HZ-G9RS>

Fernandez, M., EMEP, 2022, Inorganics in air and particle phase at Cabo de Creus, data hosted by EBAS at NILU, Part of DOI: <https://doi.org/10.48597/RH38-RN4E>, <https://doi.org/10.48597/NKZB-QC7X>

Fernandez, M., EMEP, 2022, Inorganics in air and particle phase at Campisabalos, data hosted by EBAS at NILU, Part of DOI: <https://doi.org/10.48597/5WUF-WVEK>, <https://doi.org/10.48597/8S4A-VDZ6>, <https://doi.org/10.48597/H75V-DN8Z>

Fernandez, M., EMEP, 2022, Inorganics in air and particle phase at Els Torms, data hosted by EBAS at NILU, Part of DOI: <https://doi.org/10.48597/QJ4H-R9GM>

Fernandez, M., EMEP, 2022, Inorganics in air and particle phase at Els Torms, data hosted by EBAS at NILU, Part of DOI: <https://doi.org/10.48597/UFSK-X8TR>, <https://doi.org/10.48597/NMH6-SBYT>, <https://doi.org/10.48597/5E2C-M2KD>

Fernandez, M., EMEP, 2022, Inorganics in air and particle phase at Mahón, data hosted by EBAS at NILU, Part of DOI: <https://doi.org/10.48597/CPRP-YCTM>, <https://doi.org/10.48597/69QD-B4VW>

Fernandez, M., EMEP, 2022, Inorganics in air and particle phase at O Saviñao, data hosted by EBAS at NILU, Part of DOI: <https://doi.org/10.48597/HF4S-A47P>, <https://doi.org/10.48597/NTTZ-HVVG>

Fernandez, M., EMEP, 2022, Inorganics in air and particle phase at Penausende, data hosted by EBAS at NILU, Part of DOI: <https://doi.org/10.48597/EAKR-T86C>, <https://doi.org/10.48597/5SNF-45YH>

Fernandez, M., EMEP, 2022, Inorganics in air and particle phase at San Pablo de los Montes, data hosted by EBAS at NILU, Part of DOI: <https://doi.org/10.48597/66VC-5Z7H>

Fernandez, M., EMEP, 2022, Inorganics in air and particle phase at San Pablo de los Montes, data hosted by EBAS at NILU, Part of DOI: <https://doi.org/10.48597/KGQQ-PU4S>

Fernandez, M., EMEP, 2022, Inorganics in air and particle phase at Víznar, data hosted by EBAS at NILU, Part of DOI: <https://doi.org/10.48597/QJ8X-GANZ>, <https://doi.org/10.48597/YGTE-JJNX>, <https://doi.org/10.48597/WS82-JRGE>

Fernandez, M., EMEP, 2022, Inorganics in air and particle phase at Víznar, data hosted by EBAS at NILU, Part of DOI: <https://doi.org/10.48597/RZ7E-4XAZ>, <https://doi.org/10.48597/XY92-4JCW>

Fernandez, M., EMEP, 2022, Inorganics in air and particle phase at Zarra, data hosted by EBAS at NILU, Part of DOI: <https://doi.org/10.48597/HNGJ-DKPZ>, <https://doi.org/10.48597/XSHH-B35K>

Fernandez, M., EMEP, 2022, Inorganics in air and particle phase at Zarra, data hosted by EBAS at NILU, Part of DOI: <https://doi.org/10.48597/NUGF-CHJ3>

Fernandez, M., EMEP, 2022, Pm10\_mass at Campisabalos, data hosted by EBAS at NILU, Part of DOI: <https://doi.org/10.48597/B44Q-NSAQ>

Fernandez, M., EMEP, 2022, Pm10\_mass at O Saviñao, data hosted by EBAS at NILU, Part of DOI: <https://doi.org/10.48597/4NMA-MGQW>

Fernandez, M., EMEP, 2022, Pm10\_mass at Penausende, data hosted by EBAS at NILU, Part of DOI: <https://doi.org/10.48597/2MMK-TKAP>

Fernandez, M., EMEP, 2022, Pm10\_mass at Zarra, data hosted by EBAS at NILU, Part of DOI: <https://doi.org/10.48597/XK26-EJEA>

Fernandez, M., EMEP, 2022, Pm25\_mass at Barcarrota, data hosted by EBAS at NILU, Part of DOI: <https://doi.org/10.48597/4YJ8-C3YC>

Fernandez, M., EMEP, 2022, Pm25\_mass at Cabo de Creus, data hosted by EBAS at NILU, Part of DOI: <https://doi.org/10.48597/YKA7-UKYR>

Fernandez, M., EMEP, 2022, Pm25\_mass at Campisabalos, data hosted by EBAS at NILU, Part of DOI: <https://doi.org/10.48597/W8RP-2EDN>

Fernandez, M., EMEP, 2022, Pm25\_mass at Els Torms, data hosted by EBAS at NILU, Part of DOI: <https://doi.org/10.48597/6D3A-TX5M>

Fernandez, M., EMEP, 2022, Pm25\_mass at Mahón, data hosted by EBAS at NILU, Part of DOI: <https://doi.org/10.48597/GD6H-QSXX>

Fernandez, M., EMEP, 2022, Pm25\_mass at O Saviñao, data hosted by EBAS at NILU, Part of DOI: <https://doi.org/10.48597/59E9-84U3>

Fernandez, M., EMEP, 2022, Pm25\_mass at Víznar, data hosted by EBAS at NILU, Part of DOI: <https://doi.org/10.48597/9H9P-MFJ8>

Fernandez, M., EMEP, 2022, Pm25\_mass at Zarra, data hosted by EBAS at NILU, Part of DOI: <https://doi.org/10.48597/YYBT-BM2E>

Fiebig, M., NILU, 2015, PM mass at Birkenes II, data hosted by EBAS at NILU, Part of DOI: <https://doi.org/10.48597/P3HD-KWCT>

Flentje, H., Briel, B., GAW-WDCA, 2023, Pm10\_mass at Hohenpeissenberg, data hosted by EBAS at NILU, Part of DOI: <https://doi.org/10.48597/SXR8-AKD2>

Flentje, H., Briel, B., GAW-WDCA, 2023, Pm10\_mass at Hohenpeissenberg, data hosted by EBAS at NILU, Part of DOI: <https://doi.org/10.48597/ZQM7-QBDZ>

Flentje, H., EMEP, EUSAAR, GAW-WDCA, 2009, Pm10\_mass at Hohenpeissenberg, data hosted by EBAS at NILU, Part of DOI: <https://doi.org/10.48597/4HFV-65TP>

Flentje, H., EMEP, EUSAAR, GAW-WDCA, 2012, Pm10\_mass at Hohenpeissenberg, data hosted by EBAS at NILU, Part of DOI: <https://doi.org/10.48597/KEBP-ZP2V>

Flentje, H., EMEP, EUSAAR, GAW-WDCA, 2012, Pm10\_mass at Hohenpeissenberg, data hosted by EBAS at NILU, Part of DOI: <https://doi.org/10.48597/WJQ9-Q5A2>

Flentje, H., EMEP, GAW-WDCA, 2017, Pm10\_mass at Hohenpeissenberg, data hosted by EBAS at NILU, Part of DOI: <https://doi.org/10.48597/BE6C-QKGC>

Flentje, H., GAW-WDCA, 2017, Pm10\_mass at Hohenpeissenberg, data hosted by EBAS at NILU, Part of DOI: <https://doi.org/10.48597/BE6C-QKGC>

Font, A., CAMPAIGN, EMEP, 2023, OC/EC at Donon, data hosted by EBAS at NILU, Part of DOI: <https://doi.org/10.48597/7JX9-F86F>

Font, A., CAMPAIGN, EMEP, 2023, OC/EC at La Coulonche, data hosted by EBAS at NILU, Part of DOI: <https://doi.org/10.48597/493W-X3BQ>

Font, A., CAMPAIGN, EMEP, 2023, OC/EC at Peyrusse Vieille, data hosted by EBAS at NILU, Part of DOI: <https://doi.org/10.48597/PT7Q-ZS9M>

Froehlich, M., CAMPAIGN, EMEP, 2007, OC/EC at Illmitz, data hosted by EBAS at NILU, Part of DOI: <https://doi.org/10.48597/9RJJ-AM6K>, <https://doi.org/10.48597/DHQ7-Y7WA>

Froehlich, M., EMEP, 2003, OC/EC and inorganics in air and particle phase at Illmitz, data hosted by EBAS at NILU, Part of DOI: <https://doi.org/10.48597/979C-BUAW>

Froehlich, M., EMEP, 2003, OC/EC and inorganics in air and particle phase at Illmitz, data hosted by EBAS at NILU, Part of DOI: <https://doi.org/10.48597/HWN5-843F>

Froehlich, M., EMEP, 2003, Pm10\_mass at St. Koloman, data hosted by EBAS at NILU, Part of DOI: <https://doi.org/10.48597/GHTA-R8D5>

Froehlich, M., EMEP, 2003, Pm10\_mass at Vorhegg, data hosted by EBAS at NILU, Part of DOI: <https://doi.org/10.48597/YNZ5-BXTU>

Froehlich, M., EMEP, 2007, Pm10\_mass at Illmitz, data hosted by EBAS at NILU, Part of DOI: <https://doi.org/10.48597/4EDP-NSV8>

Froehlich, M., EMEP, 2007, Pm25\_mass at Illmitz, data hosted by EBAS at NILU, Part of DOI: <https://doi.org/10.48597/Q2JT-KGQ5>

Froehlich, M., EMEP, 2007, Pm25\_mass at Illmitz, data hosted by EBAS at NILU, Part of DOI: <https://doi.org/10.48597/ZHTX-P2VE>

Froehlich, M., EMEP, 2009, PM mass at Zoebelboden, data hosted by EBAS at NILU, Part of DOI: <https://doi.org/10.48597/5R3Q-PK6R>, <https://doi.org/10.48597/3CGV-K7NN>

Froehlich, M., EMEP, 2009, Pm10\_mass at Vorhegg, data hosted by EBAS at NILU, Part of DOI: <https://doi.org/10.48597/YNZ5-BXTU>

Froehlich, M., EMEP, 2009, Pm10\_mass at Zoebelboden, data hosted by EBAS at NILU, Part of DOI: <https://doi.org/10.48597/5R3Q-PK6R>

Froehlich, M., EMEP, 2014, Pm10\_mass at St. Koloman, data hosted by EBAS at NILU, Part of DOI: <https://doi.org/10.48597/GHTA-R8D5>

Froehlich, M., EMEP, 2014, Pm10\_mass at Vorhegg, data hosted by EBAS at NILU, Part of DOI: <https://doi.org/10.48597/YNZ5-BXTU>

Froehlich, M., EMEP, 2011, Pm10\_mass at Vorhegg, data hosted by EBAS at NILU, Part of DOI: <https://doi.org/10.48597/CXDN-X9ME>

Froehlich, M., EMEP, 2011, Pm10\_mass at Zoebelboden, data hosted by EBAS at NILU, Part of DOI: <https://doi.org/10.48597/QUBU-83SV>

Froehlich, M., EMEP, 2013, PM mass at Illmitz, data hosted by EBAS at NILU, Part of DOI: <https://doi.org/10.48597/YZME-XK48>

Froehlich, M., EMEP, 2013, Pm10\_mass at Vorhegg, data hosted by EBAS at NILU, Part of DOI: <https://doi.org/10.48597/CXDN-X9ME>

Froehlich, M., EMEP, 2013, Pm10\_mass at Zoebelboden, data hosted by EBAS at NILU, Part of DOI: <https://doi.org/10.48597/QUBU-83SV>

Froehlich, M., EMEP, 2014, PM mass at Illmitz, data hosted by EBAS at NILU, Part of DOI: <https://doi.org/10.48597/YZME-XK48>

Froehlich, M., EMEP, 2014, Pm10\_mass at Vorhegg, data hosted by EBAS at NILU, Part of DOI: <https://doi.org/10.48597/CXDN-X9ME>

Froehlich, M., EMEP, 2014, Pm10\_mass at Zoebelboden, data hosted by EBAS at NILU, Part of DOI: <https://doi.org/10.48597/QUBU-83SV>

Froehlich, M., EMEP, 2015, PM mass at Illmitz, data hosted by EBAS at NILU, Part of DOI: <https://doi.org/10.48597/Y88V-UDX2>, <https://doi.org/10.48597/SM4S-3XN6>

Froehlich, M., EMEP, 2015, Pm10\_mass at Vorhegg, data hosted by EBAS at NILU, Part of DOI: <https://doi.org/10.48597/CXDN-X9ME>

Froehlich, M., EMEP, 2015, Pm10\_mass at Zoebelboden, data hosted by EBAS at NILU, Part of DOI: <https://doi.org/10.48597/QUBU-83SV>

Froehlich, M., EMEP, 2016, PM mass at Illmitz, data hosted by EBAS at NILU, Part of DOI: <https://doi.org/10.48597/YZME-XK48>

Froehlich, M., EMEP, 2016, Pm10\_mass at Vorhegg, data hosted by EBAS at NILU, Part of DOI: <https://doi.org/10.48597/CXDN-X9ME>

Froehlich, M., EMEP, 2016, Pm10\_mass at Zoebelboden, data hosted by EBAS at NILU, Part of DOI: <https://doi.org/10.48597/QUBU-83SV>

Froehlich, M., EMEP, 2016, PM mass at Illmitz, data hosted by EBAS at NILU, Part of DOI: <https://doi.org/10.48597/YZME-XK48>

Gehrig, R., CAMPAIGN, EMEP, 2007, OC/EC at Payerne, data hosted by EBAS at NILU, Part of DOI: <https://doi.org/10.48597/F6WK-E9XB>

Gehrig, R., CAMPAIGN, EMEP, 2009, Sodium at Payerne, data hosted by EBAS at NILU, Part of DOI: <https://doi.org/10.48597/ETYT-63PV>

Gehrig, R., CAMPAIGN, EMEP, 2015, Inorganics in air and particle phase at Payerne, data hosted by EBAS at NILU, Part of DOI: <https://doi.org/10.48597/Z52G-GY5Z>

Gehrig, R., EMEP, 2009, PM mass at Chaumont, data hosted by EBAS at NILU, Part of DOI: <https://doi.org/10.48597/FMEG-845E>, <https://doi.org/10.48597/FYYB-XKVF>

Gehrig, R., EMEP, 2009, PM mass at Chaumont, data hosted by EBAS at NILU, Part of DOI: <https://doi.org/10.48597/FMEG-845E>, <https://doi.org/10.48597/NEQC-PC34>

Gehrig, R., EMEP, 2009, PM mass at Payerne, data hosted by EBAS at NILU, Part of DOI: <https://doi.org/10.48597/63GE-2K4K>, <https://doi.org/10.48597/ZBE4-JTT3>

Gehrig, R., EMEP, 2009, Pm10\_mass at Chaumont, data hosted by EBAS at NILU, Part of DOI: <https://doi.org/10.48597/FMEG-845E>

Gehrig, R., EMEP, 2009, Pm10\_mass at Jungfraujoch, data hosted by EBAS at NILU, Part of DOI: <https://doi.org/10.48597/M2SH-KA9C>

Gehrig, R., EMEP, 2009, Pm10\_mass at Payerne, data hosted by EBAS at NILU, Part of DOI: <https://doi.org/10.48597/63GE-2K4K>

Gehrig, R., EMEP, 2009, Pm10\_mass at Rigi, data hosted by EBAS at NILU, Part of DOI: <https://doi.org/10.48597/9RQE-QK8R>

Gehrig, R., EMEP, 2009, Pm10\_mass at Tännikon, data hosted by EBAS at NILU, Part of DOI: <https://doi.org/10.48597/GNYZ-C2Q6>

Gehrig, R., EMEP, 2009, Pm25\_mass at Payerne, data hosted by EBAS at NILU, Part of DOI: <https://doi.org/10.48597/6FWT-3VZ5>

Gehrig, R., EMEP, 2009, Pm25\_mass at Rigi, data hosted by EBAS at NILU, Part of DOI: <https://doi.org/10.48597/8RBT-43BE>

Gehrig, R., EMEP, 2012, Pm10\_mass at Chaumont, data hosted by EBAS at NILU, Part of DOI: <https://doi.org/10.48597/FMEG-845E>

Gehrig, R., EMEP, 2012, Pm10\_mass at Jungfrauoch, data hosted by EBAS at NILU, Part of DOI: <https://doi.org/10.48597/BGYK-YF4H>

Gehrig, R., EMEP, 2012, Pm10\_mass at Payerne, data hosted by EBAS at NILU, Part of DOI: <https://doi.org/10.48597/HNK4-24Z9>

Gehrig, R., EMEP, 2012, Pm10\_mass at Rigi, data hosted by EBAS at NILU, Part of DOI: <https://doi.org/10.48597/2W9W-RA3Z>

Gehrig, R., EMEP, 2012, Pm10\_mass at Tännikon, data hosted by EBAS at NILU, Part of DOI: <https://doi.org/10.48597/GNYZ-C2Q6>

Gehrig, R., EMEP, 2012, Pm25\_mass at Payerne, data hosted by EBAS at NILU, Part of DOI: <https://doi.org/10.48597/6FWT-3VZ5>

Gehrig, R., EMEP, 2012, Pm25\_mass at Rigi, data hosted by EBAS at NILU, Part of DOI: <https://doi.org/10.48597/8RBT-43BE>

Gehrig, R., EMEP, 2014, Pm10\_mass at Chaumont, data hosted by EBAS at NILU, Part of DOI: <https://doi.org/10.48597/FMEG-845E>

Gehrig, R., EMEP, 2014, Pm10\_mass at Jungfrauoch, data hosted by EBAS at NILU, Part of DOI: <https://doi.org/10.48597/M2SH-KA9C>

Gehrig, R., EMEP, 2014, Pm10\_mass at Payerne, data hosted by EBAS at NILU, Part of DOI: <https://doi.org/10.48597/63GE-2K4K>

Gehrig, R., EMEP, 2014, Pm10\_mass at Rigi, data hosted by EBAS at NILU, Part of DOI: <https://doi.org/10.48597/9RQE-QK8R>

Gehrig, R., EMEP, 2014, Pm10\_mass at Tännikon, data hosted by EBAS at NILU, Part of DOI: <https://doi.org/10.48597/GNYZ-C2Q6>

Gehrig, R., EMEP, 2014, Pm25\_mass at Payerne, data hosted by EBAS at NILU, Part of DOI: <https://doi.org/10.48597/6FWT-3VZ5>

Gehrig, R., EMEP, 2014, Pm25\_mass at Rigi, data hosted by EBAS at NILU, Part of DOI: <https://doi.org/10.48597/8RBT-43BE>

Genberg, J., EMEP, EUSAAR, GAW-WDCA, 2010, OC/EC at Vavihill, data hosted by EBAS at NILU, Part of DOI: <https://doi.org/10.48597/QN23-3ZVE>

Genberg, J., EMEP, EUSAAR, GAW-WDCA, 2011, OC/EC at Vavihill, data hosted by EBAS at NILU, Part of DOI: <https://doi.org/10.48597/RKM5-WY4Z>

Gilardoni, S., EUCAARI, GAW-WDCA, 2010, OC/EC and inorganics in air and particle phase at Gual Pahari, data hosted by EBAS at NILU, Part of DOI: <https://doi.org/10.48597/BG9P-N6C6>

Gina, U., EMEP, 2012, Pm10\_mass at Poiana Stampei, data hosted by EBAS at NILU, Part of DOI: <https://doi.org/10.48597/VHD3-M3WB>

Gina, U., EMEP, 2013, Pm10\_mass at Poiana Stampei, data hosted by EBAS at NILU, Part of DOI: <https://doi.org/10.48597/VHD3-M3WB>

Gina, U., EMEP, 2015, Pm10\_mass at Poiana Stampei, data hosted by EBAS at NILU, Part of DOI: <https://doi.org/10.48597/KBPH-VDWB>

Gina, U., EMEP, 2016, Pm10\_mass at Poiana Stampei, data hosted by EBAS at NILU, Part of DOI: <https://doi.org/10.48597/KBPH-VDWB>

Gomez, Dario; Smichowski, Patricia, Multielemental Profile of PM1010 of Buenos Aires, Argentina, 2024, <https://zenodo.org/records/10926019>

Gonzalez, A., CAMPAIGN, EMEP, 2007, Pm10\_mass at Montseny, data hosted by EBAS at NILU, Part of DOI: <https://doi.org/10.48597/8YA7-CQ69>

Gonzalez, A., CAMPAIGN, EMEP, 2007, Pm10\_mass at Montseny, data hosted by EBAS at NILU, Part of DOI: <https://doi.org/10.48597/KDTJ-VVW7>



Gonzalez, A., CREATE, EMEP, EUSAAR, GAW-WDCA, 2007, Inorganics in air and particle phase at Montseny, data hosted by EBAS at NILU, Part of DOI: <https://doi.org/10.48597/27FC-BC7B>

Gonzalez, A., EMEP, 2002, Pm25\_mass at Risco Llamu, data hosted by EBAS at NILU, Part of DOI: <https://doi.org/10.48597/FG72-SZVF>

Gonzalez, A., EMEP, 2008, Aluminium and inorganics in air and particle phase at Montseny, data hosted by EBAS at NILU, Part of DOI: <https://doi.org/10.48597/RMJR-PBBX>, <https://doi.org/10.48597/PZNG-P53H>

Gonzalez, A., EMEP, 2008, OC/EC and aluminium at Montseny, data hosted by EBAS at NILU, Part of DOI: <https://doi.org/10.48597/4QXR-FGFC>, <https://doi.org/10.48597/97Y3-H69V>

Gonzalez, A., EMEP, 2008, OC/EC at Montseny, data hosted by EBAS at NILU, Part of DOI: <https://doi.org/10.48597/QMBY-8CRE>

Gonzalez, A., EMEP, 2008, OC/EC, aluminium and inorganics in air and particle phase at Montseny, data hosted by EBAS at NILU, Part of DOI: <https://doi.org/10.48597/RMJR-PBBX>, <https://doi.org/10.48597/MS3V-R79T>

Gonzalez, A., EMEP, 2014, Inorganics in air and particle phase at Risco Llamu, data hosted by EBAS at NILU, Part of DOI: <https://doi.org/10.48597/3VCY-FFR4>

Gonzalez, A., EMEP, 2014, Pm25\_mass at Risco Llamu, data hosted by EBAS at NILU, Part of DOI: <https://doi.org/10.48597/FG72-SZVF>

Gonzalez, A., EMEP, EUSAAR, GAW-WDCA, 2008, Inorganics in air and particle phase at Montseny, data hosted by EBAS at NILU, Part of DOI: <https://doi.org/10.48597/97Y3-H69V>

Gruening, C., CAMPAIGN, EMEP, 2008, Inorganics in air and particle phase at Ispra, data hosted by EBAS at NILU, Part of DOI: <https://doi.org/10.48597/GB8M-HJPY>

Gruening, C., EMEP, 2007, Elemental carbon at Ispra, data hosted by EBAS at NILU, Part of DOI: <https://doi.org/10.48597/FM4Q-XKPG>

Gruening, C., EMEP, 2007, Organic carbon at Ispra, data hosted by EBAS at NILU, Part of DOI: <https://doi.org/10.48597/SC55-A3YE>

Gruening, C., EMEP, 2008, Inorganics in air and particle phase at Ispra, data hosted by EBAS at NILU, Part of DOI: <https://doi.org/10.48597/JPZR-BNK9>, <https://doi.org/10.48597/Z24E-2SN3>

Gruening, C., EMEP, 2010, Ammonium at Ispra, data hosted by EBAS at NILU, Part of DOI: <https://doi.org/10.48597/ZJFH-9F5Z>

Gruening, C., EMEP, 2014, Inorganics in air and particle phase at Ispra, data hosted by EBAS at NILU, Part of DOI: <https://doi.org/10.48597/6W6S-GZVB>, <https://doi.org/10.48597/Z24E-2SN3>

Gruening, C., EMEP, 2014, Inorganics in air and particle phase at Ispra, data hosted by EBAS at NILU, Part of DOI: <https://doi.org/10.48597/JPZR-BNK9>, <https://doi.org/10.48597/Z24E-2SN3>

Gruening, C., EMEP, 2014, Organic carbon at Ispra, data hosted by EBAS at NILU, Part of DOI: <https://doi.org/10.48597/SC55-A3YE>

Gruening, C., EMEP, 2014, Sulphate total at Ispra, data hosted by EBAS at NILU, Part of DOI: <https://doi.org/10.48597/6W6S-GZVB>

Hakola, H., AMAP, EMEP, 2016, Pm25\_mass at Pallas (Matorova), data hosted by EBAS at NILU, Part of DOI: <https://doi.org/10.48597/Z3FP-X7NF>

Hakola, H., AMAP, EMEP, 2018, Pm25\_mass at Pallas (Matorova), data hosted by EBAS at NILU, Part of DOI: <https://doi.org/10.48597/Z3FP-X7NF>

Hakola, H., EMEP, 2012, Pm10\_mass at Virolahti II, data hosted by EBAS at NILU, Part of DOI: <https://doi.org/10.48597/CGC8-98AP>

Hakola, H., EMEP, 2012, Pm25\_mass at Utö, data hosted by EBAS at NILU, Part of DOI: <https://doi.org/10.48597/PF6R-WYHC>

Hakola, H., EMEP, 2013, Organic carbon at Oulanka, data hosted by EBAS at NILU, Part of DOI: <https://doi.org/10.48597/6BMP-PJRF>

Hakola, H., EMEP, 2013, Organic carbon at Utö, data hosted by EBAS at NILU, Part of DOI: <https://doi.org/10.48597/3FM8-4SXP>

Hakola, H., EMEP, 2013, Organic carbon at Virolahti II, data hosted by EBAS at NILU, Part of DOI: <https://doi.org/10.48597/K6E4-UH3U>

Hakola, H., EMEP, 2013, Pm10\_mass at Virolahti II, data hosted by EBAS at NILU, Part of DOI: <https://doi.org/10.48597/CGC8-98AP>

Hakola, H., EMEP, 2013, Pm25\_mass at Utö, data hosted by EBAS at NILU, Part of DOI: <https://doi.org/10.48597/PF6R-WYHC>

Hakola, H., EMEP, 2016, Pm10\_mass at Virolahti II, data hosted by EBAS at NILU, Part of DOI: <https://doi.org/10.48597/CGC8-98AP>

Hakola, H., EMEP, 2016, Pm10\_mass at Virolahti III, data hosted by EBAS at NILU, Part of DOI: <https://doi.org/10.48597/G8D9-SPKB>

Hakola, H., EMEP, 2016, Pm25\_mass at Utö, data hosted by EBAS at NILU, Part of DOI: <https://doi.org/10.48597/PF6R-WYHC>

Hakola, H., EMEP, 2016, Pm25\_mass at Virolahti II, data hosted by EBAS at NILU, Part of DOI: <https://doi.org/10.48597/92MR-ZGJT>

Hakola, H., EMEP, 2016, Pm25\_mass at Virolahti III, data hosted by EBAS at NILU, Part of DOI: <https://doi.org/10.48597/Z8TH-8324>

Hakola, H., EMEP, 2018, Pm10\_mass at Pallas (Sammaltunturi), data hosted by EBAS at NILU, Part of DOI: <https://doi.org/10.48597/NRS5-9Y2U>

Hakola, H., EMEP, 2018, Pm10\_mass at Virolahti III, data hosted by EBAS at NILU, Part of DOI: <https://doi.org/10.48597/G8D9-SPKB>

Hakola, H., EMEP, 2018, Pm25\_mass at Utö, data hosted by EBAS at NILU, Part of DOI: <https://doi.org/10.48597/PF6R-WYHC>

Hakola, H., EMEP, 2018, Pm25\_mass at Virolahti III, data hosted by EBAS at NILU, Part of DOI: <https://doi.org/10.48597/Z8TH-8324>

Hanssen, J., CAMP, CREATE, EMEP, GAW-WDCA, NILU, 2004, Ammonium at Birkenes, data hosted by EBAS at NILU, Part of DOI: <https://doi.org/10.48597/47Y8-Q7GQ>

Hanssen, J., CAMP, CREATE, EMEP, GAW-WDCA, NILU, 2014, Ammonium at Birkenes, data hosted by EBAS at NILU, Part of DOI: <https://doi.org/10.48597/47Y8-Q7GQ>

Hanssen, J., CAMP, EMEP, NILU, 2014, Pm25\_mass at Lista, data hosted by EBAS at NILU, Part of DOI: <https://doi.org/10.48597/7K6H-JP94>

Hanssen, J., CAMPAIGN, EMEP, NILU, 2007, Inorganics in air and particle phase at Birkenes, data hosted by EBAS at NILU, Part of DOI: <https://doi.org/10.48597/QYP9-TQG4>

Hanssen, J., CAMPAIGN, EMEP, NILU, 2014, Inorganics in air and particle phase at Birkenes, data hosted by EBAS at NILU, Part of DOI: <https://doi.org/10.48597/323F-J8N3>

Hanssen, J., EMEP, NILU, 2004, PM mass at Birkenes, data hosted by EBAS at NILU, Part of DOI: <https://doi.org/10.48597/DYKJ-TNKF>

Hanssen, J., EMEP, NILU, 2004, Pm25\_mass at Lista, data hosted by EBAS at NILU, Part of DOI: <https://doi.org/10.48597/32UW-8T87>

Hanssen, J., EMEP, NILU, 2024, PM mass at Birkenes, data hosted by EBAS at NILU, Part of DOI: <https://doi.org/10.48597/DYKJ-TNKF>

Hansson, H., CAMPAIGN, EMEP, 2004, OC/EC and pm10\_mass at Aspvreten, data hosted by EBAS at NILU, Part of DOI: <https://doi.org/10.48597/PZQS-99BP>

Harrison, R., EMEP, EUSAAR, GAW-WDCA, 2009, Nitrate at Harwell, data hosted by EBAS at NILU, Part of DOI: <https://doi.org/10.48597/TTDP-7Z4J>

Harrison, R., EMEP, EUSAAR, GAW-WDCA, 2010, Sulphate\_total at Harwell, data hosted by EBAS at NILU, Part of DOI: <https://doi.org/10.48597/RKYA-RXAS>

Harrison, R., EMEP, EUSAAR, GAW-WDCA, 2012, OC/EC at Harwell, data hosted by EBAS at NILU, Part of DOI: <https://doi.org/10.48597/74CC-J55K>

Harrison, R., EMEP, EUSAAR, GAW-WDCA, 2014, Nitrate at Harwell, data hosted by EBAS at NILU, Part of DOI: <https://doi.org/10.48597/TTDP-7Z4J>

Harrison, R., EMEP, EUSAAR, GAW-WDCA, 2014, OC/EC at Harwell, data hosted by EBAS at NILU, Part of DOI: <https://doi.org/10.48597/XQVD-9CZ2>

Harrison, R., EMEP, EUSAAR, GAW-WDCA, 2014, Sulphate\_total at Harwell, data hosted by EBAS at NILU, Part of DOI: <https://doi.org/10.48597/RKYA-RXAS>

Hellén, H., AMAP, EMEP, 2020, Pm25\_mass at Pallas (Matorova), data hosted by EBAS at NILU, Part of DOI: <https://doi.org/10.48597/CK8K-R5RJ>

Hellén, H., AMAP, EMEP, 2021, Pm25\_mass at Pallas (Matorova), data hosted by EBAS at NILU, Part of DOI: <https://doi.org/10.48597/CK8K-R5RJ>

Hellén, H., AMAP, EMEP, 2022, Pm25\_mass at Pallas (Matorova), data hosted by EBAS at NILU, Part of DOI: <https://doi.org/10.48597/CK8K-R5RJ>

Hellén, H., AMAP, EMEP, 2022, Pm25\_mass at Pallas (Matorova), data hosted by EBAS at NILU, Part of DOI: <https://doi.org/10.48597/X3TP-83TT>

Hellén, H., AMAP, EMEP, 2023, PM mass at Pallas (Matorova), data hosted by EBAS at NILU, Part of DOI: <https://doi.org/10.48597/NCHF-8P4J>, <https://doi.org/10.48597/X3TP-83TT>

Hellén, H., EMEP, 2020, PM mass at Virolahti III, data hosted by EBAS at NILU, Part of DOI: <https://doi.org/10.48597/EF4N-ND6D>, <https://doi.org/10.48597/NB3J-FQ8R>

Hellén, H., EMEP, 2020, Pm10\_mass at Pallas (Sammaltunturi), data hosted by EBAS at NILU, Part of DOI: <https://doi.org/10.48597/8WXQ-WAS6>

Hellén, H., EMEP, 2020, Pm25\_mass at Utö, data hosted by EBAS at NILU, Part of DOI: <https://doi.org/10.48597/5MRK-D98F>

Hellén, H., EMEP, 2021, Pm10\_mass at Pallas (Sammaltunturi), data hosted by EBAS at NILU, Part of DOI: <https://doi.org/10.48597/8WXQ-WAS6>

Hellén, H., EMEP, 2021, Pm10\_mass at Virolahti III, data hosted by EBAS at NILU, Part of DOI: <https://doi.org/10.48597/EF4N-ND6D>

Hellén, H., EMEP, 2022, PM mass at Virolahti III, data hosted by EBAS at NILU, Part of DOI: <https://doi.org/10.48597/GWGS-HGAV>, <https://doi.org/10.48597/MBDB-BDGH>

Hellén, H., EMEP, 2022, Pm10\_mass at Pallas (Sammaltunturi), data hosted by EBAS at NILU, Part of DOI: <https://doi.org/10.48597/UVFC-TUDA>

Hellén, H., EMEP, 2023, PM mass at Pallas (Sammaltunturi), data hosted by EBAS at NILU, Part of DOI: <https://doi.org/10.48597/UVFC-TUDA>, <https://doi.org/10.48597/WZP5-44MK>

Hellén, H., EMEP, 2023, PM mass at Utö, data hosted by EBAS at NILU, Part of DOI: <https://doi.org/10.48597/NJFV-P6MR>, <https://doi.org/10.48597/V96A-YKXX>

Hellén, H., EMEP, 2023, PM mass at Virolahti III, data hosted by EBAS at NILU, Part of DOI: <https://doi.org/10.48597/GWGS-HGAV>, <https://doi.org/10.48597/MBDB-BDGH>

Hellén, H., EMEP, 2023, Pm25\_mass at Utö, data hosted by EBAS at NILU, Part of DOI: <https://doi.org/10.48597/V96A-YKXX>

Herut, B. Particulate atmospheric concentrations of trace metals and leachable nutrients in air at the Southeastern Mediterranean Sea (1994-1999), 2024. <https://zenodo.org/records/11004473>

Herjavic, G., EMEP, 2023, Pm10\_mass at Puntijarka, data hosted by EBAS at NILU, Part of DOI: <https://doi.org/10.48597/Z42P-356K>

Herjavic, G., EMEP, 2023, Pm25\_mass at Puntijarka, data hosted by EBAS at NILU, Part of DOI: <https://doi.org/10.48597/CDUZ-Q3EA>

Holoubek, I., ACTRIS, EMEP, GAW-WDCA, 2017, OC/EC at Kosetice (NAOK), data hosted by EBAS at NILU, Part of DOI: <https://doi.org/10.48597/AW5Q-X9G3>

Holubova, A., EMEP, 2020, Pm10\_mass at Churanov, data hosted by EBAS at NILU, Part of DOI: <https://doi.org/10.48597/ESXV-RZ7U>

Holubova, A., EMEP, 2020, Pm10\_mass at Kosetice (NAOK), data hosted by EBAS at NILU, Part of DOI: <https://doi.org/10.48597/YW5B-47DF>

Holubova, A., EMEP, 2020, Pm25\_mass at Kosetice (NAOK), data hosted by EBAS at NILU, Part of DOI: <https://doi.org/10.48597/FY7T-QPU6>

Holubova, A., EMEP, 2020, Sodium at Kosetice (NAOK), data hosted by EBAS at NILU, Part of DOI: <https://doi.org/10.48597/A6RN-UBA6>

Holubova, A., EMEP, 2021, PM mass at Kosetice (NAOK), data hosted by EBAS at NILU, Part of DOI: <https://doi.org/10.48597/YW5B-47DF>, <https://doi.org/10.48597/FY7T-QPU6>

Holubova, A., EMEP, 2021, Pm10\_mass at Churanov, data hosted by EBAS at NILU, Part of DOI: <https://doi.org/10.48597/ESXV-RZ7U>

Holubova, A., EMEP, 2021, Pm10\_mass at Kosetice (NAOK), data hosted by EBAS at NILU, Part of DOI: <https://doi.org/10.48597/UDAA-HGWN>

Holubova, A., EMEP, 2021, Pm25\_mass at Kosetice (NAOK), data hosted by EBAS at NILU, Part of DOI: <https://doi.org/10.48597/AYCF-T2XC>

Holubova, A., EMEP, 2021, Sodium at Kosetice (NAOK), data hosted by EBAS at NILU, Part of DOI: <https://doi.org/10.48597/A6RN-UBA6>

Holubova, A., EMEP, 2022, PM mass at Kosetice (NAOK), data hosted by EBAS at NILU, Part of DOI: <https://doi.org/10.48597/FBVU-UBNV>, <https://doi.org/10.48597/TZUQ-QRS4>

Holubova, A., EMEP, 2023, PM mass at Kosetice (NAOK), data hosted by EBAS at NILU, Part of DOI: <https://doi.org/10.48597/FBVU-UBNV>, <https://doi.org/10.48597/TZUQ-QRS4>

Holubova, A., EMEP, 2023, Pm10\_mass at Churanov, data hosted by EBAS at NILU, Part of DOI: <https://doi.org/10.48597/7YC4-AZ6T>

Holubova, A., EMEP, 2023, Pm10\_mass at Kosetice (NAOK), data hosted by EBAS at NILU, Part of DOI: <https://doi.org/10.48597/UFB6-ZUDH>

Holubova, A., EMEP, 2023, Pm25\_mass at Kosetice (NAOK), data hosted by EBAS at NILU, Part of DOI: <https://doi.org/10.48597/KK9Z-FZAX>

Holubova, A., EMEP, 2023, Sodium at Kosetice (NAOK), data hosted by EBAS at NILU, Part of DOI: <https://doi.org/10.48597/RW4R-FU2D>

Holubova, A., EMEP, GAW-WDCA, 2022, OC/EC at Kosetice (NAOK), data hosted by EBAS at NILU, Part of DOI: <https://doi.org/10.48597/ABXM-77EU>

Holubova, A., EMEP, GAW-WDCA, 2023, OC/EC at Kosetice (NAOK), data hosted by EBAS at NILU, Part of DOI: <https://doi.org/10.48597/ABXM-77EU>

Hopke, P. K. (2024). Complete PM Compositional Data Set from Kevo, Finland [Data set]. Zenodo. <https://doi.org/10.5281/zenodo.10882915>

Huang, L., GAW-WDCA, 2017, OC/EC at Toronto, data hosted by EBAS at NILU, Part of DOI: <https://doi.org/10.48597/WCFP-P4MN>

Hueglin, C., ACTRIS, EMEP, 2023, OC/EC at Payerne, data hosted by EBAS at NILU, Part of DOI: <https://doi.org/10.48597/J4TE-JCAE>

Hueglin, C., ACTRIS, EMEP, 2023, OC/EC at Rigi, data hosted by EBAS at NILU, Part of DOI: <https://doi.org/10.48597/9WXN-CWJ3>

Hueglin, C., CAMPAIGN, EMEP, 2009, OC/EC at Payerne, data hosted by EBAS at NILU, Part of DOI: <https://doi.org/10.48597/J8WX-R5G6>

Hueglin, C., CAMPAIGN, EMEP, 2022, OC/EC and pm10\_mass at Zürich-Kaserne, data hosted by EBAS at NILU, Part of DOI: <https://doi.org/10.48597/SGHP-7TZZ>, <https://doi.org/10.48597/EP4S-BTBJ>, <https://doi.org/10.48597/ZPQ8-SNZR>

Hueglin, C., CAMPAIGN, EMEP, 2022, Pm25\_mass at Zürich-Kaserne, data hosted by EBAS at NILU, Part of DOI: <https://doi.org/10.48597/GN5R-ZTA4>

Hueglin, C., CAMPAIGN, EMEP, 2023, OC/EC and pm10\_mass at Beromünster, data hosted by EBAS at NILU, Part of DOI: <https://doi.org/10.48597/P5BH-794M>, <https://doi.org/10.48597/QMPZ-Q3MC>

Hueglin, C., EMEP, 2012, OC/EC at Payerne, data hosted by EBAS at NILU, Part of DOI: <https://doi.org/10.48597/P94N-RVYE>

Hueglin, C., EMEP, 2012, OC/EC at Rigi, data hosted by EBAS at NILU, Part of DOI: <https://doi.org/10.48597/FWEM-3QEN>

Hueglin, C., EMEP, 2013, OC/EC and pm25\_mass at Payerne, data hosted by EBAS at NILU, Part of DOI: <https://doi.org/10.48597/ZJFD-EH72>

Hueglin, C., EMEP, 2013, OC/EC and pm25\_mass at Rigi, data hosted by EBAS at NILU, Part of DOI: <https://doi.org/10.48597/KP9B-PW4X>

Hueglin, C., EMEP, 2013, Pm10\_mass at Chaumont, data hosted by EBAS at NILU, Part of DOI: <https://doi.org/10.48597/89DN-YTJV>

Hueglin, C., EMEP, 2013, Pm10\_mass at Jungfraujoch, data hosted by EBAS at NILU, Part of DOI: <https://doi.org/10.48597/BGYK-YF4H>

Hueglin, C., EMEP, 2013, Pm10\_mass at Payerne, data hosted by EBAS at NILU, Part of DOI: <https://doi.org/10.48597/FWVZ-5DNK>

Hueglin, C., EMEP, 2013, Pm10\_mass at Tänikon, data hosted by EBAS at NILU, Part of DOI: <https://doi.org/10.48597/GNYZ-C2Q6>

Hueglin, C., EMEP, 2014, Pm10\_mass at Rigi, data hosted by EBAS at NILU, Part of DOI: <https://doi.org/10.48597/M8UR-4KF9>

Hueglin, C., EMEP, 2015, OC/EC and pm25\_mass at Payerne, data hosted by EBAS at NILU, Part of DOI: <https://doi.org/10.48597/RVKY-VFF5>, <https://doi.org/10.48597/FMQT-SRQR>, <https://doi.org/10.48597/NYJ4-B9EH>

Hueglin, C., EMEP, 2015, OC/EC and pm25\_mass at Rigi, data hosted by EBAS at NILU, Part of DOI: <https://doi.org/10.48597/CYSE-TP5V>, <https://doi.org/10.48597/4HCZ-R2JZ>, <https://doi.org/10.48597/BWWJ-EZN9>

Hueglin, C., EMEP, 2015, Pm10\_mass at Chaumont, data hosted by EBAS at NILU, Part of DOI: <https://doi.org/10.48597/89DN-YTJV>

Hueglin, C., EMEP, 2015, Pm10\_mass at Jungfraujoch, data hosted by EBAS at NILU, Part of DOI: <https://doi.org/10.48597/TFTP-S5RH>

Hueglin, C., EMEP, 2015, Pm10\_mass at Payerne, data hosted by EBAS at NILU, Part of DOI: <https://doi.org/10.48597/VSK5-C2U3>

Hueglin, C., EMEP, 2015, Pm10\_mass at Rigi, data hosted by EBAS at NILU, Part of DOI: <https://doi.org/10.48597/F9F5-X8FR>

Hueglin, C., EMEP, 2015, Pm10\_mass at Tänikon, data hosted by EBAS at NILU, Part of DOI: <https://doi.org/10.48597/RM74-XYQ8>

Hueglin, C., EMEP, 2023, OC/EC and pm25\_mass at Payerne, data hosted by EBAS at NILU, Part of DOI: <https://doi.org/10.48597/RVKY-VFF5>, <https://doi.org/10.48597/FMQT-SRQR>, <https://doi.org/10.48597/NYJ4-B9EH>

Hueglin, C., EMEP, 2023, OC/EC and pm25\_mass at Rigi, data hosted by EBAS at NILU, Part of DOI: <https://doi.org/10.48597/CYSE-TP5V>, <https://doi.org/10.48597/4HCZ-R2JZ>, <https://doi.org/10.48597/BWWJ-EZN9>

Hueglin, C., EMEP, 2023, OC/EC at Payerne, data hosted by EBAS at NILU, Part of DOI: <https://doi.org/10.48597/J4TE-JCAE>

Hueglin, C., EMEP, 2023, OC/EC at Rigi, data hosted by EBAS at NILU, Part of DOI: <https://doi.org/10.48597/9WXN-CWJ3>

Hueglin, C., EMEP, 2023, Pm10\_mass at Beromünster, data hosted by EBAS at NILU, Part of DOI: <https://doi.org/10.48597/W82N-FMM3>

Hueglin, C., EMEP, 2023, Pm10\_mass at Chaumont, data hosted by EBAS at NILU, Part of DOI: <https://doi.org/10.48597/89DN-YTJV>

Hueglin, C., EMEP, 2023, Pm10\_mass at Jungfrauoch, data hosted by EBAS at NILU, Part of DOI: <https://doi.org/10.48597/TFTP-S5RH>

Hueglin, C., EMEP, 2023, Pm10\_mass at Payerne, data hosted by EBAS at NILU, Part of DOI: <https://doi.org/10.48597/VSK5-C2U3>

Hueglin, C., EMEP, 2023, Pm10\_mass at Rigi, data hosted by EBAS at NILU, Part of DOI: <https://doi.org/10.48597/F9F5-X8FR>

Hueglin, C., EMEP, 2023, Pm10\_mass at Tänikon, data hosted by EBAS at NILU, Part of DOI: <https://doi.org/10.48597/RM74-XYQ8>

Hueglin, C., EMEP, 2023, Pm25\_mass at Payerne, data hosted by EBAS at NILU, Part of DOI: <https://doi.org/10.48597/YV3Q-GQJJ>

Hueglin, C., EMEP, 2023, Pm25\_mass at Rigi, data hosted by EBAS at NILU, Part of DOI: <https://doi.org/10.48597/KP93-K7PH>

Ilahi, A., Andri, Y., GAW-WDCA, 2012, Pm10\_mass at Bukit Kototabang, data hosted by EBAS at NILU, Part of DOI: <https://doi.org/10.48597/KJ6E-BX8M>

Indriksone, I., EMEP, 2022, PM mass at Rucava, data hosted by EBAS at NILU, Part of DOI: <https://doi.org/10.48597/S8A7-PK2D>

Indriksone, I., EMEP, 2023, Inorganics in air and particle phase at Rucava, data hosted by EBAS at NILU, Part of DOI: <https://doi.org/10.48597/6MT8-PYG6>, <https://doi.org/10.48597/TJ77-6PZ2>

Indriksone, I., EMEP, 2023, PM mass at Rucava, data hosted by EBAS at NILU, Part of DOI: <https://doi.org/10.48597/MV6J-F6P9>

Indriksone, I., EMEP, GAW-WDCA, 2023, Inorganics in air and particle phase at Rucava, data hosted by EBAS at NILU, Part of DOI: <https://doi.org/10.48597/6MT8-PYG6>, <https://doi.org/10.48597/TJ77-6PZ2>

Indriksone, I., EMEP, GAW-WDCA, 2023, Inorganics in air and particle phase at Rucava, data hosted by EBAS at NILU, Part of DOI: <https://doi.org/10.48597/9E2K-B2ER>, <https://doi.org/10.48597/22WH-UHEZ>

Indriksone, I., EMEP, GAW-WDCA, 2023, PM mass at Rucava, data hosted by EBAS at NILU, Part of DOI: <https://doi.org/10.48597/YB4W-TEXC>

Indriksone, I., EMEP, GAW-WDCA, 2023, PM mass at Rucava, data hosted by EBAS at NILU, Part of DOI: <https://doi.org/10.48597/ZXYE-XY6N>

Ingen, H., EMEP, 2008, Pm10\_mass at Eibergen, data hosted by EBAS at NILU, Part of DOI: <https://doi.org/10.48597/YQQV-3V3S>

Ingen, H., EMEP, 2008, Pm10\_mass at Kollumerwaard, data hosted by EBAS at NILU, Part of DOI: <https://doi.org/10.48597/XZF7-NV4X>

Ingen, H., EMEP, 2008, Pm10\_mass at Vredepeel, data hosted by EBAS at NILU, Part of DOI: <https://doi.org/10.48597/8ZRY-6YJ4>

Iveta, D., EMEP, 2010, Inorganics in air and particle phase at Rucava, data hosted by EBAS at NILU, Part of DOI: <https://doi.org/10.48597/GPQS-NN5V>

Iveta, D., EMEP, 2010, Inorganics in air and particle phase at Zoseni, data hosted by EBAS at NILU, Part of DOI: <https://doi.org/10.48597/W7G2-EE8K>

Iveta, D., EMEP, 2010, PM mass at Zoseni, data hosted by EBAS at NILU, Part of DOI: <https://doi.org/10.48597/C4WG-SDZJ>

Iveta, D., EMEP, 2011, Inorganics in air and particle phase at Rucava, data hosted by EBAS at NILU, Part of DOI: <https://doi.org/10.48597/48CB-976Q>

Iveta, D., EMEP, 2011, PM mass at Rucava, data hosted by EBAS at NILU, Part of DOI: <https://doi.org/10.48597/B4EE-V3PN>

Iveta, D., EMEP, 2011, Pm10\_mass at Rucava, data hosted by EBAS at NILU, Part of DOI: <https://doi.org/10.48597/R85M-KHW2>

Iveta, D., EMEP, 2011, Pm25\_mass at Rucava, data hosted by EBAS at NILU, Part of DOI: <https://doi.org/10.48597/KKRC-GR2G>

Iveta, D., EMEP, 2014, PM mass at Zoseni, data hosted by EBAS at NILU, Part of DOI: <https://doi.org/10.48597/HQ9K-V2X6>

Iveta, I., EMEP, 2012, Inorganics in air and particle phase at Rucava, data hosted by EBAS at NILU, Part of DOI: <https://doi.org/10.48597/SNV7-5FAJ>

Iveta, I., EMEP, 2012, PM mass at Rucava, data hosted by EBAS at NILU, Part of DOI: <https://doi.org/10.48597/B4EE-V3PN>

Iveta, I., EMEP, 2012, Sulphate\_corrected at Rucava, data hosted by EBAS at NILU, Part of DOI: <https://doi.org/10.48597/TEXN-GS3E>

Iveta, I., EMEP, 2013, Pm10\_mass at Rucava, data hosted by EBAS at NILU, Part of DOI: <https://doi.org/10.48597/R85M-KHW2>

Iveta, I., EMEP, 2013, Pm25\_mass at Rucava, data hosted by EBAS at NILU, Part of DOI: <https://doi.org/10.48597/9ZPG-QX9S>

Iveta, I., EMEP, 2014, Inorganics in air and particle phase at Rucava, data hosted by EBAS at NILU, Part of DOI: <https://doi.org/10.48597/SDBY-VNXH>, <https://doi.org/10.48597/TEXN-GS3E>, <https://doi.org/10.48597/GWYN-4YVK>, <https://doi.org/10.48597/RHCE-WSUK>, <https://doi.org/10.48597/868K-ZYU2>

Iveta, I., EMEP, 2014, Pm10\_mass at Rucava, data hosted by EBAS at NILU, Part of DOI: <https://doi.org/10.48597/R85M-KHW2>

Iveta, I., EMEP, 2014, Pm25\_mass at Rucava, data hosted by EBAS at NILU, Part of DOI: <https://doi.org/10.48597/7SZ4-QKD9>

Iveta, I., EMEP, 2015, Inorganics in air and particle phase at Rucava, data hosted by EBAS at NILU, Part of DOI: <https://doi.org/10.48597/JTP8-BZX7>, <https://doi.org/10.48597/ED9Y-73B3>, <https://doi.org/10.48597/UQZU-NZB3>, <https://doi.org/10.48597/KP8F-GSH5>, <https://doi.org/10.48597/936Y-8UTP>

Jaffrezo, J., Conil, S., Elazzouzi, R., ACTRIS, EMEP, GAW-WDCA, 2022, OC/EC at Observatoire Perenne de l'Environnement, data hosted by EBAS at NILU, Part of DOI: <https://doi.org/10.48597/77QC-RW4Q>

Jaffrezo, J., Conil, S., Elazzouzi, R., ACTRIS, EMEP, GAW-WDCA, 2022, OC/EC at Observatoire Perenne de l'Environnement, data hosted by EBAS at NILU, Part of DOI: <https://doi.org/10.48597/N5XS-K2TD>

Jaffrezo, J., Conil, S., Elazzouzi, R., ACTRIS, EMEP, GAW-WDCA, 2023, OC/EC at Observatoire Perenne de l'Environnement, data hosted by EBAS at NILU, Part of DOI: <https://doi.org/10.48597/77QC-RW4Q>

Jaffrezo, J., Conil, S., Elazzouzi, R., ACTRIS, EMEP, GAW-WDCA, 2023, OC/EC at Observatoire Perenne de l'Environnement, data hosted by EBAS at NILU, Part of DOI: <https://doi.org/10.48597/N5XS-K2TD>

Jaffrezo, J., Conil, S., Vella, A., ACTRIS, EMEP, GAW-WDCA, 2021, OC/EC at Observatoire Perenne de l'Environnement, data hosted by EBAS at NILU, Part of DOI: <https://doi.org/10.48597/3NWK-K6S4>

Jaffrezo, J., Conil, S., Vella, A., ACTRIS, EMEP, GAW-WDCA, 2021, OC/EC at Observatoire Perenne de l'Environnement, data hosted by EBAS at NILU, Part of DOI: <https://doi.org/10.48597/597D-98KD>

Jaffrezo, J., Conil, S., Vella, A., ACTRIS, EMEP, GAW-WDCA, 2021, OC/EC at Observatoire Perenne de l'Environnement, data hosted by EBAS at NILU, Part of DOI: <https://doi.org/10.48597/A6N3-Y8EA>

Jaffrezo, J., Conil, S., Vella, A., ACTRIS, EMEP, GAW-WDCA, 2021, OC/EC at Observatoire Perenne de l'Environnement, data hosted by EBAS at NILU, Part of DOI: <https://doi.org/10.48597/HWQ3-8WE4>

Jaffrezo, J., Conil, S., Vella, A., ACTRIS, EMEP, GAW-WDCA, 2021, OC/EC at Observatoire Perenne de l'Environnement, data hosted by EBAS at NILU, Part of DOI: <https://doi.org/10.48597/MKN2-JF5R>

Jaffrezo, J., Conil, S., Vella, A., ACTRIS, EMEP, GAW-WDCA, 2021, OC/EC at Observatoire Perenne de l'Environnement, data hosted by EBAS at NILU, Part of DOI: <https://doi.org/10.48597/U632-CZ2G>

Jonge, D., EUSAAR, GAW-WDCA, 2009, OC/EC at Jan\_van\_Galenstraat, data hosted by EBAS at NILU, Part of DOI: <https://doi.org/10.48597/MRYS-XNUF>

Jonge, D., EUSAAR, GAW-WDCA, 2009, OC/EC at Jan\_van\_Galenstraat, data hosted by EBAS at NILU, Part of DOI: <https://doi.org/10.48597/WHAB-5ADQ>

Jonge, D., EUSAAR, GAW-WDCA, 2009, OC/EC at Overtoom, data hosted by EBAS at NILU, Part of DOI: <https://doi.org/10.48597/SEG4-7QG8>

Jonge, D., EUSAAR, GAW-WDCA, 2009, OC/EC at Overtoom, data hosted by EBAS at NILU, Part of DOI: <https://doi.org/10.48597/Z88T-VEKN>

Jonge, D., EUSAAR, GAW-WDCA, 2009, OC/EC at Ring\_A10\_Zuid, data hosted by EBAS at NILU, Part of DOI: <https://doi.org/10.48597/FNY8-C96X>

Jonge, D., EUSAAR, GAW-WDCA, 2009, OC/EC at Ring\_A10\_Zuid, data hosted by EBAS at NILU, Part of DOI: <https://doi.org/10.48597/Q89W-YNXT>

Kasper-Giebl, A., ACTRIS, CAMPAIGN, COLOSSAL, EMEP, 2018, OC/EC at Sonnblick, data hosted by EBAS at NILU, Part of DOI: <https://doi.org/10.48597/Y2HR-ZP4J>

Kasper-Giebl, A., Buxbaum, I., ACTRIS, CAMPAIGN, COLOSSAL, EMEP, 2018, OC/EC at Illmitz, data hosted by EBAS at NILU, Part of DOI: <https://doi.org/10.48597/VAXQ-334S>

Katriina, K., AMAP, EMEP, 2012, Aluminium at Pallas (Matorova), data hosted by EBAS at NILU, Part of DOI: <https://doi.org/10.48597/RUCR-RQV7>

Katriina, K., AMAP, EMEP, 2013, Aluminium at Pallas (Matorova), data hosted by EBAS at NILU, Part of DOI: <https://doi.org/10.48597/42NT-7AJG>

Katriina, K., EMEP, 2012, Aluminium at Ähtäri II, data hosted by EBAS at NILU, Part of DOI: <https://doi.org/10.48597/E2AN-MPCC>

Katriina, K., EMEP, 2013, Aluminium at Ähtäri II, data hosted by EBAS at NILU, Part of DOI: <https://doi.org/10.48597/E2AN-MPCC>

Katriina, K., EMEP, 2013, Aluminium at Virolahti II, data hosted by EBAS at NILU, Part of DOI: <https://doi.org/10.48597/PJ2R-CT98>

Katriina, K., EMEP, HELCOM, 2012, Aluminium at Virolahti II, data hosted by EBAS at NILU, Part of DOI: <https://doi.org/10.48597/KA4S-56QT>

Keller, R., EMEP, 2010, Pm10\_mass at Lille Valby, data hosted by EBAS at NILU, Part of DOI: <https://doi.org/10.48597/8WPM-7CQ2>

Keller, R., EMEP, 2011, Pm10\_mass at Risø, data hosted by EBAS at NILU, Part of DOI: <https://doi.org/10.48597/N6TV-995B>

Keller, R., EMEP, 2012, Pm10\_mass at Risø, data hosted by EBAS at NILU, Part of DOI: <https://doi.org/10.48597/HPJ7-FNQD>

Keller, R., EMEP, 2013, Pm10\_mass at Risø, data hosted by EBAS at NILU, Part of DOI: <https://doi.org/10.48597/HPJ7-FNQD>

Kemp, K., CAMP, EMEP, 2011, Pm10\_mass at Keldsnor, data hosted by EBAS at NILU, Part of DOI: <https://doi.org/10.48597/3SCM-TF5G>

Kemp, K., CAMPAIGN, EMEP, 2008, Pm25\_mass at Lille Valby, data hosted by EBAS at NILU, Part of DOI: <https://doi.org/10.48597/42M4-KHNG>

Kemp, K., CAMPAIGN, EMEP, 2014, Pm10\_mass at Lille Valby, data hosted by EBAS at NILU, Part of DOI: <https://doi.org/10.48597/TAEC-3TJT>

Kemp, K., CAMPAIGN, EMEP, 2014, Pm25\_mass at Lille Valby, data hosted by EBAS at NILU, Part of DOI: <https://doi.org/10.48597/42M4-KHNG>

Kemp, K., EMEP, 2006, Pm10\_mass at Keldsnor, data hosted by EBAS at NILU, Part of DOI: <https://doi.org/10.48597/53RQ-HK24>

Kemp, K., EMEP, 2015, Pm10\_mass at Keldsnor, data hosted by EBAS at NILU, Part of DOI: <https://doi.org/10.48597/CQ2M-USKQ>

Kim, J., GAW-WDCA, 2023, Pm10\_mass at Anmyeon-do, data hosted by EBAS at NILU, Part of DOI: <https://doi.org/10.48597/SDTK-CF82>

Kim, J., Ryoo, S., GAW-WDCA, 2017, Pm10\_mass at Anmyeon-do, data hosted by EBAS at NILU, Part of DOI: <https://doi.org/10.48597/73S4-F7RU>

Kim, J., Ryoo, S., GAW-WDCA, 2018, Pm10\_mass at Anmyeon-do, data hosted by EBAS at NILU, Part of DOI: <https://doi.org/10.48597/FKE4-G48H>

Kiss, G., CAMPAIGN, EMEP, 2009, OC/EC at K-pusztá, data hosted by EBAS at NILU, Part of DOI: <https://doi.org/10.48597/EK28-AZKC>

Kiss, G., CAMPAIGN, EMEP, 2015, Pm10\_mass at K-pusztá, data hosted by EBAS at NILU, Part of DOI: <https://doi.org/10.48597/SA8B-XUPK>

Kiss, G., Hoffer, A., ACTRIS, EMEP, EUSAAR, GAW-WDCA, 2014, OC/EC at K-pusztá, data hosted by EBAS at NILU, Part of DOI: <https://doi.org/10.48597/6MKK-HHWW>

Kiss, G., Hoffer, A., ACTRIS, EMEP, EUSAAR, GAW-WDCA, 2014, OC/EC at K-pusztá, data hosted by EBAS at NILU, Part of DOI: <https://doi.org/10.48597/K347-DB9P>

Kiss, G., Hoffer, A., ACTRIS, EMEP, EUSAAR, GAW-WDCA, 2014, OC/EC at K-pusztá, data hosted by EBAS at NILU, Part of DOI: <https://doi.org/10.48597/QCZS-8RW3>

Kiss, G., Hoffer, A., ACTRIS, EMEP, EUSAAR, GAW-WDCA, 2014, OC/EC at K-pusztá, data hosted by EBAS at NILU, Part of DOI: <https://doi.org/10.48597/T3SB-DZPE>

Kiss, G., Hoffer, A., ACTRIS, EMEP, GAW-WDCA, 2015, OC/EC at K-pusztá, data hosted by EBAS at NILU, Part of DOI: <https://doi.org/10.48597/JJZK-NS3K>



Kiss, G., Hoffer, A., ACTRIS, EMEP, GAW-WDCA, 2016, OC/EC at K-puszt, data hosted by EBAS at NILU, Part of DOI: <https://doi.org/10.48597/JJZK-NS3K>

Kiss, G., Hoffer, A., EMEP, EUSAAR, GAW-WDCA, 2011, Organic\_carbon at K-puszt, data hosted by EBAS at NILU, Part of DOI: <https://doi.org/10.48597/J8ND-4JT7>

Kiss, G., Hoffer, A., EMEP, EUSAAR, GAW-WDCA, 2014, Organic\_carbon at K-puszt, data hosted by EBAS at NILU, Part of DOI: <https://doi.org/10.48597/3WRM-H6VU>

Kiss, G., Hoffer, A., EMEP, EUSAAR, GAW-WDCA, 2015, OC/EC at K-puszt, data hosted by EBAS at NILU, Part of DOI: <https://doi.org/10.48597/WZTD-MH6T>

Kleanthous, S., EMEP, 2008, Pm10\_mass at Agia Marina Xyliatou / Cyprus Atmospheric Observatory, data hosted by EBAS at NILU, Part of DOI: <https://doi.org/10.48597/A32B-WNTR>

Kleanthous, S., EMEP, 2008, Pm25\_mass at Agia Marina Xyliatou / Cyprus Atmospheric Observatory, data hosted by EBAS at NILU, Part of DOI: <https://doi.org/10.48597/K58S-B9SZ>

Kleanthous, S., EMEP, 2009, Pm10\_mass at Agia Marina Xyliatou / Cyprus Atmospheric Observatory, data hosted by EBAS at NILU, Part of DOI: <https://doi.org/10.48597/A32B-WNTR>

Kleanthous, S., EMEP, 2009, Pm25\_mass at Agia Marina Xyliatou / Cyprus Atmospheric Observatory, data hosted by EBAS at NILU, Part of DOI: <https://doi.org/10.48597/K58S-B9SZ>

Kleanthous, S., EMEP, 2012, OC/EC and inorganics in air and particle phase at Agia Marina Xyliatou / Cyprus Atmospheric Observatory, data hosted by EBAS at NILU, Part of DOI: <https://doi.org/10.48597/P25Y-E8H2>

Kleanthous, S., EMEP, 2013, OC/EC and inorganics in air and particle phase at Agia Marina Xyliatou / Cyprus Atmospheric Observatory, data hosted by EBAS at NILU, Part of DOI: <https://doi.org/10.48597/P25Y-E8H2>

Kleanthous, S., EMEP, 2015, OC/EC and inorganics in air and particle phase at Agia Marina Xyliatou / Cyprus Atmospheric Observatory, data hosted by EBAS at NILU, Part of DOI: <https://doi.org/10.48597/H4F9-6D76>

Kleanthous, S., EMEP, 2016, Aluminium at Agia Marina Xyliatou / Cyprus Atmospheric Observatory, data hosted by EBAS at NILU, Part of DOI: <https://doi.org/10.48597/RK6J-F7DB>

Kleanthous, S., EMEP, 2017, Aluminium at Agia Marina Xyliatou / Cyprus Atmospheric Observatory, data hosted by EBAS at NILU, Part of DOI: <https://doi.org/10.48597/FBCK-8B3D>

Kleanthous, S., EMEP, 2017, Aluminium at Agia Marina Xyliatou / Cyprus Atmospheric Observatory, data hosted by EBAS at NILU, Part of DOI: <https://doi.org/10.48597/RK6J-F7DB>

Kleanthous, S., EMEP, 2018, Aluminium at Agia Marina Xyliatou / Cyprus Atmospheric Observatory, data hosted by EBAS at NILU, Part of DOI: <https://doi.org/10.48597/HVSC-5TJP>

Kleanthous, S., EMEP, 2018, Aluminium at Agia Marina Xyliatou / Cyprus Atmospheric Observatory, data hosted by EBAS at NILU, Part of DOI: <https://doi.org/10.48597/RK6J-F7DB>

Kleanthous, S., EMEP, 2018, Ammonium at Agia Marina Xyliatou / Cyprus Atmospheric Observatory, data hosted by EBAS at NILU, Part of DOI: <https://doi.org/10.48597/CYCA-H6UX>

Kleanthous, S., EMEP, 2018, Inorganics in air and particle phase at Agia Marina Xyliatou / Cyprus Atmospheric Observatory, data hosted by EBAS at NILU, Part of DOI: <https://doi.org/10.48597/4RG4-97YH>, <https://doi.org/10.48597/R8NQ-MA8H>

Kleanthous, S., EMEP, 2018, Inorganics in air and particle phase at Agia Marina Xyliatou / Cyprus Atmospheric Observatory, data hosted by EBAS at NILU, Part of DOI: <https://doi.org/10.48597/S7DS-GG2N>

Kleanthous, S., EMEP, 2018, Pm10\_mass at Agia Marina Xyliatou / Cyprus Atmospheric Observatory, data hosted by EBAS at NILU, Part of DOI: <https://doi.org/10.48597/DWN4-T22K>

Knezevic, J., EMEP, 2017, Pm10\_mass at Kamenicki vis, data hosted by EBAS at NILU, Part of DOI: <https://doi.org/10.48597/R468-GREM>

Knezevic, J., EMEP, 2018, Pm10\_mass at Kamenicki vis, data hosted by EBAS at NILU, Part of DOI: <https://doi.org/10.48597/R468-GREM>

Knezevic, J., EMEP, 2019, Pm10\_mass at Kamenicki vis, data hosted by EBAS at NILU, Part of DOI: <https://doi.org/10.48597/R468-GREM>

Knezevic, J., EMEP, 2020, Pm10\_mass at Kamenicki vis, data hosted by EBAS at NILU, Part of DOI: <https://doi.org/10.48597/R468-GREM>

Ko, H., GAW-WDCA, 2018, Inorganics in air and particle phase at Anmyeon-do, data hosted by EBAS at NILU, Part of DOI: <https://doi.org/10.48597/V2C7-BWEY>

Ko, H., GAW-WDCA, 2019, Inorganics in air and particle phase at Anmyeon-do, data hosted by EBAS at NILU, Part of DOI: <https://doi.org/10.48597/V2C7-BWEY>

Ko, H., GAW-WDCA, 2020, Inorganics in air and particle phase at Anmyeon-do, data hosted by EBAS at NILU, Part of DOI: <https://doi.org/10.48597/V2C7-BWEY>



Ko, H., GAW-WDCA, 2021, Inorganics in air and particle phase at Anmyeon-do, data hosted by EBAS at NILU, Part of DOI: <https://doi.org/10.48597/V2C7-BWEY>

Ko, H., GAW-WDCA, 2022, Inorganics in air and particle phase at Anmyeon-do, data hosted by EBAS at NILU, Part of DOI: <https://doi.org/10.48597/V8KE-RAF3>

Ko, H., Ryoo, S., GAW-WDCA, 2017, Inorganics in air and particle phase at Anmyeon-do, data hosted by EBAS at NILU, Part of DOI: <https://doi.org/10.48597/V8KE-RAF3>

Kolesa, T., EMEP, 2010, Aluminium at Iskrba, data hosted by EBAS at NILU, Part of DOI: <https://doi.org/10.48597/A4PZ-GEF3>

Kolesa, T., EMEP, 2011, Aluminium at Iskrba, data hosted by EBAS at NILU, Part of DOI: <https://doi.org/10.48597/P43T-3WNG>

Kolesa, T., EMEP, 2011, Aluminium at Iskrba, data hosted by EBAS at NILU, Part of DOI: <https://doi.org/10.48597/TQJR-2VTS>

Kolesa, T., EMEP, 2014, Aluminium at Iskrba, data hosted by EBAS at NILU, Part of DOI: <https://doi.org/10.48597/A4PZ-GEF3>

Kolesa, T., EMEP, 2014, OC/EC at Iskrba, data hosted by EBAS at NILU, Part of DOI: <https://doi.org/10.48597/5CMN-EMPA>, <https://doi.org/10.48597/EAMS-6TEU>

Kolesa, T., EMEP, 2017, OC/EC at Iskrba, data hosted by EBAS at NILU, Part of DOI: <https://doi.org/10.48597/QRUZ-AW9N>

Kolesa, T., Kranjc, I., EMEP, 2017, PM mass at Iskrba, data hosted by EBAS at NILU, Part of DOI: <https://doi.org/10.48597/FGC4-MH9K>

Kolesa, T., Kranjc, I., EMEP, 2017, Pm10\_mass at Iskrba, data hosted by EBAS at NILU, Part of DOI: <https://doi.org/10.48597/G5Q7-TDZR>

Kolesa, T., Kranjc, I., EMEP, 2018, Pm10\_mass at Iskrba, data hosted by EBAS at NILU, Part of DOI: <https://doi.org/10.48597/G5Q7-TDZR>

Kolesa, T., Kranjc, I., EMEP, 2018, Pm25\_mass at Iskrba, data hosted by EBAS at NILU, Part of DOI: <https://doi.org/10.48597/YM4V-M4FG>

Kolesa, T., Kranjc, I., EMEP, 2019, Inorganics in air and particle phase at Iskrba, data hosted by EBAS at NILU, Part of DOI: <https://doi.org/10.48597/TDE3-9G63>

Kolesa, T., Kranjc, I., EMEP, 2019, Inorganics in air and particle phase at Iskrba, data hosted by EBAS at NILU, Part of DOI: <https://doi.org/10.48597/TDE3-9G63>, <https://doi.org/10.48597/HDJE-R459>

Kolesa, T., Kranjc, I., EMEP, 2019, Pm10\_mass at Iskrba, data hosted by EBAS at NILU, Part of DOI: <https://doi.org/10.48597/G5Q7-TDZR>

Kolesa, T., Kranjc, I., EMEP, 2019, Pm25\_mass at Iskrba, data hosted by EBAS at NILU, Part of DOI: <https://doi.org/10.48597/YM4V-M4FG>

Kolesa, T., Kranjc, I., EMEP, 2020, Inorganics in air and particle phase at Iskrba, data hosted by EBAS at NILU, Part of DOI: <https://doi.org/10.48597/TDE3-9G63>, <https://doi.org/10.48597/HDJE-R459>

Kolesa, T., Kranjc, I., EMEP, 2020, OC/EC at Iskrba, data hosted by EBAS at NILU, Part of DOI: <https://doi.org/10.48597/TQMP-Y3CQ>

Kolesa, T., Kranjc, I., EMEP, 2020, Pm10\_mass at Iskrba, data hosted by EBAS at NILU, Part of DOI: <https://doi.org/10.48597/G5Q7-TDZR>

Kolesa, T., Kranjc, I., EMEP, 2020, Pm25\_mass at Iskrba, data hosted by EBAS at NILU, Part of DOI: <https://doi.org/10.48597/YM4V-M4FG>

Kolesa, T., Kranjc, I., EMEP, 2021, Inorganics in air and particle phase at Iskrba, data hosted by EBAS at NILU, Part of DOI: <https://doi.org/10.48597/TDE3-9G63>, <https://doi.org/10.48597/HDJE-R459>

Kolesa, T., Kranjc, I., EMEP, 2021, OC/EC at Iskrba, data hosted by EBAS at NILU, Part of DOI: <https://doi.org/10.48597/58C7-DKYF>

Kolesa, T., Kranjc, I., EMEP, 2021, OC/EC at Iskrba, data hosted by EBAS at NILU, Part of DOI: <https://doi.org/10.48597/QRUZ-AW9N>

Kolesa, T., Kranjc, I., EMEP, 2021, OC/EC at Iskrba, data hosted by EBAS at NILU, Part of DOI: <https://doi.org/10.48597/TQMP-Y3CQ>

Kolesa, T., Kranjc, I., EMEP, 2023, Inorganics in air and particle phase at Iskrba, data hosted by EBAS at NILU, Part of DOI: <https://doi.org/10.48597/TDE3-9G63>, <https://doi.org/10.48597/HDJE-R459>

Kolesa, T., Kranjc, I., EMEP, 2023, OC/EC at Iskrba, data hosted by EBAS at NILU, Part of DOI: <https://doi.org/10.48597/3JJU-Q7D3>

Kolesa, T., Kranjc, I., EMEP, 2023, Pm10\_mass at Iskrba, data hosted by EBAS at NILU, Part of DOI: <https://doi.org/10.48597/G5Q7-TDZR>

Kolesa, T., Kranjc, I., EMEP, 2023, Pm25\_mass at Iskrba, data hosted by EBAS at NILU, Part of DOI: <https://doi.org/10.48597/YM4V-M4FG>

Kolesa, T., Kranjc, I., EMEP, 2024, Inorganics in air and particle phase at Iskrba, data hosted by EBAS at NILU, Part of DOI: <https://doi.org/10.48597/TDE3-9G63>, <https://doi.org/10.48597/HDJE-R459>

Kort, M., EMEP, 2013, Pm10\_mass at Lahemaa, data hosted by EBAS at NILU, Part of DOI: <https://doi.org/10.48597/YT64-NKE9>

Kort, M., EMEP, 2013, Pm25\_mass at Lahemaa, data hosted by EBAS at NILU, Part of DOI: <https://doi.org/10.48597/8QWS-2E3J>

Kort, M., EMEP, 2013, Pm25\_mass at Vilsandi, data hosted by EBAS at NILU, Part of DOI: <https://doi.org/10.48597/CPH8-RB2X>

Kozakiewicz, J., EMEP, 2023, Inorganics in air and particle phase at Zielonka, data hosted by EBAS at NILU, Part of DOI: <https://doi.org/10.48597/AZZY-ASYD>

Kozakiewicz, J., EMEP, 2023, Inorganics in air and particle phase at Zielonka, data hosted by EBAS at NILU, Part of DOI: <https://doi.org/10.48597/AZZY-ASYD>, <https://doi.org/10.48597/A4K8-TR8Q>

Kozakiewicz, J., EMEP, 2023, OC/EC at Zielonka, data hosted by EBAS at NILU, Part of DOI: <https://doi.org/10.48597/J2QS-SK3V>

Kozakiewicz, J., EMEP, 2023, Pm10\_mass at Zielonka, data hosted by EBAS at NILU, Part of DOI: <https://doi.org/10.48597/6BHX-7NTZ>

Kozakiewicz, J., EMEP, 2023, Pm25\_mass at Zielonka, data hosted by EBAS at NILU, Part of DOI: <https://doi.org/10.48597/VHN2-NA3C>

Kozakiewicz, J., EMEP, 2023, Sulphate\_corrected at Zielonka, data hosted by EBAS at NILU, Part of DOI: <https://doi.org/10.48597/A4K8-TR8Q>

Kozakiewicz, J., EMEP, 2024, Inorganics in air and particle phase at Zielonka, data hosted by EBAS at NILU, Part of DOI: <https://doi.org/10.48597/AZZY-ASYD>, <https://doi.org/10.48597/A4K8-TR8Q>

Kozakiewicz, J., Kaluzinska, I., EMEP, 2023, OC/EC at Zielonka, data hosted by EBAS at NILU, Part of DOI: <https://doi.org/10.48597/J2QS-SK3V>

Kranjc, I., Kolesa, T., EMEP, 2019, Pm25\_mass at Iskrba, data hosted by EBAS at NILU, Part of DOI: <https://doi.org/10.48597/YM4V-M4FG>

Kranjc, I., Kolesa, T., EMEP, 2021, OC/EC at Iskrba, data hosted by EBAS at NILU, Part of DOI: <https://doi.org/10.48597/QRUZ-AW9N>

Krejci, R., Hamzavi, Z., ACTRIS, EMEP, GAW-WDCA, 2023, OC/EC at Norunda Stenen, data hosted by EBAS at NILU, Part of DOI: <https://doi.org/10.48597/4JZ3-WNKY>

Krognnes, T., EMEP, NILU, 2000, Pm10\_mass at Birkenes, data hosted by EBAS at NILU, Part of DOI: <https://doi.org/10.48597/BKNJ-AXFH>

Krognnes, T., EMEP, NILU, 2014, Pm10\_mass at Birkenes, data hosted by EBAS at NILU, Part of DOI: <https://doi.org/10.48597/BKNJ-AXFH>

Kuassainova, M., EMEP, 2010, Inorganics in air and particle phase at Borovoe, data hosted by EBAS at NILU, Part of DOI: <https://doi.org/10.48597/EZT6-BZJ7>

Kulmala, M., EMEP, EUSAAR, GAW-WDCA, 2012, PM mass at Hyytiälä, data hosted by EBAS at NILU, Part of DOI: <https://doi.org/10.48597/WK4E-86CP>, <https://doi.org/10.48597/V58J-WCD4>

Kulmala, M., Petaja, T., EMEP, GAW-WDCA, 2017, PM mass at Hyytiälä, data hosted by EBAS at NILU, Part of DOI: <https://doi.org/10.48597/ZKK3-ZBCF>

Kulmala, M., Petaja, T., EMEP, GAW-WDCA, 2019, PM mass at Hyytiälä, data hosted by EBAS at NILU, Part of DOI: <https://doi.org/10.48597/ZKK3-ZBCF>

Kulmala, M., Petaja, T., GAW-WDCA, 2019, PM mass at Hyytiälä, data hosted by EBAS at NILU, Part of DOI: <https://doi.org/10.48597/ZKK3-ZBCF>

Kulmala, M., Petaja, T., GAW-WDCA, 2023, PM mass at Hyytiälä, data hosted by EBAS at NILU, Part of DOI: <https://doi.org/10.48597/ZKK3-ZBCF>

Kulmala, M., Petaja, T., GAW-WDCA, 2023, Pm10\_mass at Hyytiälä, data hosted by EBAS at NILU, Part of DOI: <https://doi.org/10.48597/XCMY-8P6J>

Kulmala, M., Petaja, T., Virkkula, A., Luoma, K., ACTRIS, CAMPAIGN, COLOSSAL, EMEP, 2018, OC/EC at Hyytiälä, data hosted by EBAS at NILU, Part of DOI: <https://doi.org/10.48597/45DE-MZNZ>

Kulmala, M., Petaja, T., Virkkula, A., Luoma, K., ACTRIS, CAMPAIGN, COLOSSAL, EMEP, 2021, OC/EC at Hyytiälä, data hosted by EBAS at NILU, Part of DOI: <https://doi.org/10.48597/45DE-MZNZ>

Larka, M., CAMP, EMEP, 2009, Nitrate at Niembro, data hosted by EBAS at NILU, Part of DOI: <https://doi.org/10.48597/4AS8-KT23>

Larka, M., CAMP, EMEP, 2011, Inorganics in air and particle phase at Niembro, data hosted by EBAS at NILU, Part of DOI: <https://doi.org/10.48597/8M5Y-VVU2>

Larka, M., CAMP, EMEP, 2014, Inorganics in air and particle phase at Niembro, data hosted by EBAS at NILU, Part of DOI: <https://doi.org/10.48597/8M5Y-VVU2>

Larka, M., CAMP, EMEP, 2014, Nitrate at Niembro, data hosted by EBAS at NILU, Part of DOI: <https://doi.org/10.48597/4AS8-KT23>

Larka, M., EMEP, 2009, Pm10\_mass at Niembro, data hosted by EBAS at NILU, Part of DOI: <https://doi.org/10.48597/4AS8-KT23>

Larka, M., EMEP, 2014, Pm10\_mass at Niembro, data hosted by EBAS at NILU, Part of DOI: <https://doi.org/10.48597/4AS8-KT23>

Larka, M., Gonzalez, A., CAMP, EMEP, 2009, Sulphate\_total at Niembro, data hosted by EBAS at NILU, Part of DOI: <https://doi.org/10.48597/M6PB-ZD6P>

Larka, M., Gonzalez, A., EMEP, 2009, Pm25\_mass at Niembro, data hosted by EBAS at NILU, Part of DOI: <https://doi.org/10.48597/NQCK-GMME>

Larka, M., Gonzalez, A., EMEP, 2009, Sodium at Campisabalos, data hosted by EBAS at NILU, Part of DOI: <https://doi.org/10.48597/45QG-BMR6>

Larka, M., Gonzalez, A., EMEP, 2009, Sodium at Campisabalos, data hosted by EBAS at NILU, Part of DOI: <https://doi.org/10.48597/89E9-2VT9>

Larka, M., Gonzalez, A., EMEP, 2009, Sulphate\_total at Campisabalos, data hosted by EBAS at NILU, Part of DOI: <https://doi.org/10.48597/S8FT-QD2U>

Larka, M., Gonzalez, A., EMEP, 2010, Pm25\_mass at Viznar, data hosted by EBAS at NILU, Part of DOI: <https://doi.org/10.48597/KEBG-FFMN>

Larka, M., Gonzalez, A., EMEP, 2014, Sodium at Campisabalos, data hosted by EBAS at NILU, Part of DOI: <https://doi.org/10.48597/89E9-2VT9>

Lee, s., GAW-WDCA, 2023, Pm10\_mass at Anmyeon-do, data hosted by EBAS at NILU, Part of DOI: <https://doi.org/10.48597/SDTK-CF82>

Lopez Bartolome, M., CAMP, EMEP, 2014, Inorganics in air and particle phase at Noia, data hosted by EBAS at NILU, Part of DOI: <https://doi.org/10.48597/6B3G-ECMC>

Lopez Bartolome, M., CAMP, EMEP, 2015, Ammonium at Niembro, data hosted by EBAS at NILU, Part of DOI: <https://doi.org/10.48597/NZH4-Y982>

Lopez Bartolome, M., CAMP, EMEP, 2015, Inorganics in air and particle phase at Doñana, data hosted by EBAS at NILU, Part of DOI: <https://doi.org/10.48597/96E8-8MEX>, <https://doi.org/10.48597/KN5C-ZRQ9>, <https://doi.org/10.48597/FFSN-Y9D9>

Lopez Bartolome, M., CAMP, EMEP, 2015, Inorganics in air and particle phase at Doñana, data hosted by EBAS at NILU, Part of DOI: <https://doi.org/10.48597/J6F4-X48U>, <https://doi.org/10.48597/MKE4-KU7Y>, <https://doi.org/10.48597/9G9Q-T3NC>

Lopez Bartolome, M., CAMP, EMEP, 2015, Inorganics in air and particle phase at Niembro, data hosted by EBAS at NILU, Part of DOI: <https://doi.org/10.48597/2S4P-YBPQ>, <https://doi.org/10.48597/NJTP-MJWW>, <https://doi.org/10.48597/8GVX-NBJ5>, <https://doi.org/10.48597/NQTQ-X3K2>, <https://doi.org/10.48597/QZSY-HP2K>

Lopez Bartolome, M., CAMP, EMEP, 2015, Inorganics in air and particle phase at Noia, data hosted by EBAS at NILU, Part of DOI: <https://doi.org/10.48597/GWYP-6GFV>, <https://doi.org/10.48597/DHGS-A3UP>, <https://doi.org/10.48597/B242-H84H>

Lopez Bartolome, M., CAMP, EMEP, 2015, Pm25\_mass at Niembro, data hosted by EBAS at NILU, Part of DOI: <https://doi.org/10.48597/GNTJ-CEEH>

Lopez Bartolome, M., CAMP, EMEP, 2016, Ammonium at Niembro, data hosted by EBAS at NILU, Part of DOI: <https://doi.org/10.48597/NZH4-Y982>

Lopez Bartolome, M., CAMP, EMEP, 2016, Inorganics in air and particle phase at Doñana, data hosted by EBAS at NILU, Part of DOI: <https://doi.org/10.48597/96E8-8MEX>, <https://doi.org/10.48597/KN5C-ZRQ9>, <https://doi.org/10.48597/FFSN-Y9D9>

Lopez Bartolome, M., CAMP, EMEP, 2016, Inorganics in air and particle phase at Niembro, data hosted by EBAS at NILU, Part of DOI: <https://doi.org/10.48597/KAND-TCRG>, <https://doi.org/10.48597/455K-K35V>, <https://doi.org/10.48597/7FWV-AT6J>, <https://doi.org/10.48597/PPSK-XJJY>, <https://doi.org/10.48597/T98A-K3HK>

Lopez Bartolome, M., CAMP, EMEP, 2016, Inorganics in air and particle phase at Niembro, data hosted by EBAS at NILU, Part of DOI: <https://doi.org/10.48597/NJTP-MJWW>, <https://doi.org/10.48597/FCV7-FGQ7>, <https://doi.org/10.48597/NQTQ-X3K2>, <https://doi.org/10.48597/68T3-EXSF>

Lopez Bartolome, M., CAMP, EMEP, 2016, Inorganics in air and particle phase at Noia, data hosted by EBAS at NILU, Part of DOI: <https://doi.org/10.48597/GWYP-6GFV>, <https://doi.org/10.48597/DHGS-A3UP>, <https://doi.org/10.48597/B242-H84H>

Lopez Bartolome, M., CAMP, EMEP, 2016, Nitrate at Niembro, data hosted by EBAS at NILU, Part of DOI: <https://doi.org/10.48597/2S4P-YBPQ>

Lopez Bartolome, M., CAMP, EMEP, 2016, Pm25\_mass at Niembro, data hosted by EBAS at NILU, Part of DOI: <https://doi.org/10.48597/GNTJ-CEEH>

Lopez Bartolome, M., CAMP, EMEP, 2017, Inorganics in air and particle phase at Niembro, data hosted by EBAS at NILU, Part of DOI: <https://doi.org/10.48597/KAND-TCRG>, <https://doi.org/10.48597/455K-K35V>, <https://doi.org/10.48597/7FWV-AT6J>, <https://doi.org/10.48597/PPSK-XJJY>, <https://doi.org/10.48597/T98A-K3HK>

Lopez Bartolome, M., EMEP, 2014, Ammonium at San Pablo de los Montes, data hosted by EBAS at NILU, Part of DOI: <https://doi.org/10.48597/YZ8E-2E9M>

Lopez Bartolome, M., EMEP, 2014, Ammonium at Víznar, data hosted by EBAS at NILU, Part of DOI: <https://doi.org/10.48597/C9EB-GGVX>

Lopez Bartolome, M., EMEP, 2014, Inorganics in air and particle phase at Mahón, data hosted by EBAS at NILU, Part of DOI: <https://doi.org/10.48597/QCKQ-K6NT>, <https://doi.org/10.48597/85FM-MCW4>, <https://doi.org/10.48597/7344-A97N>

Lopez Bartolome, M., EMEP, 2014, OC/EC at San Pablo de los Montes, data hosted by EBAS at NILU, Part of DOI: <https://doi.org/10.48597/YM2Q-V5D8>, <https://doi.org/10.48597/S7HR-F8FA>

Lopez Bartolome, M., EMEP, 2014, Organic\_carbon at San Pablo de los Montes, data hosted by EBAS at NILU, Part of DOI: <https://doi.org/10.48597/S7HR-F8FA>

Lopez Bartolome, M., EMEP, 2014, Pm25\_mass at San Pablo de los Montes, data hosted by EBAS at NILU, Part of DOI: <https://doi.org/10.48597/U6P9-ZMY7>

Lopez Bartolome, M., EMEP, 2015, Ammonium at Campisabalos, data hosted by EBAS at NILU, Part of DOI: <https://doi.org/10.48597/U3XV-GU5B>

Lopez Bartolome, M., EMEP, 2015, Ammonium at Campisabalos, data hosted by EBAS at NILU, Part of DOI: <https://doi.org/10.48597/WFX8-JFN2>

Lopez Bartolome, M., EMEP, 2015, Ammonium at Els Torms, data hosted by EBAS at NILU, Part of DOI: <https://doi.org/10.48597/6FWB-KQTH>

Lopez Bartolome, M., EMEP, 2015, Ammonium at Els Torms, data hosted by EBAS at NILU, Part of DOI: <https://doi.org/10.48597/7DJ8-7A5D>

Lopez Bartolome, M., EMEP, 2015, Ammonium at Els Torms, data hosted by EBAS at NILU, Part of DOI: <https://doi.org/10.48597/BXNN-JBJD>

Lopez Bartolome, M., EMEP, 2015, Ammonium at San Pablo de los Montes, data hosted by EBAS at NILU, Part of DOI: <https://doi.org/10.48597/R9FF-5PQT>

Lopez Bartolome, M., EMEP, 2015, Ammonium at Víznar, data hosted by EBAS at NILU, Part of DOI: <https://doi.org/10.48597/A4HQ-ZQFE>

Lopez Bartolome, M., EMEP, 2015, Elemental\_carbon at Campisabalos, data hosted by EBAS at NILU, Part of DOI: <https://doi.org/10.48597/6F7D-48MV>

Lopez Bartolome, M., EMEP, 2015, Inorganics in air and particle phase at Barcarrota, data hosted by EBAS at NILU, Part of DOI: <https://doi.org/10.48597/2CEE-84YV>, <https://doi.org/10.48597/MFJF-346Z>, <https://doi.org/10.48597/UXKG-58HM>

Lopez Bartolome, M., EMEP, 2015, Inorganics in air and particle phase at Barcarrota, data hosted by EBAS at NILU, Part of DOI: <https://doi.org/10.48597/7UV3-PDJS>, <https://doi.org/10.48597/H6RE-QJCB>, <https://doi.org/10.48597/Y8HZ-G9RS>

Lopez Bartolome, M., EMEP, 2015, Inorganics in air and particle phase at Cabo de Creus, data hosted by EBAS at NILU, Part of DOI: <https://doi.org/10.48597/93U8-2V3A>, <https://doi.org/10.48597/6YYW-739Z>, <https://doi.org/10.48597/FRYS-ATU5>

Lopez Bartolome, M., EMEP, 2015, Inorganics in air and particle phase at Cabo de Creus, data hosted by EBAS at NILU, Part of DOI: <https://doi.org/10.48597/WK3P-W5BY>, <https://doi.org/10.48597/RH38-RN4E>, <https://doi.org/10.48597/NKZB-QC7X>

Lopez Bartolome, M., EMEP, 2015, Inorganics in air and particle phase at Campisabalos, data hosted by EBAS at NILU, Part of DOI: <https://doi.org/10.48597/BMPZ-H65K>, <https://doi.org/10.48597/URTH-RV5H>, <https://doi.org/10.48597/8TRF-DDKG>, <https://doi.org/10.48597/6PEY-82ZF>, <https://doi.org/10.48597/Z8BD-AYMK>

Lopez Bartolome, M., EMEP, 2015, Inorganics in air and particle phase at Campisabalos, data hosted by EBAS at NILU, Part of DOI: <https://doi.org/10.48597/BUJE-5NW8>, <https://doi.org/10.48597/4NN7-GZHV>, <https://doi.org/10.48597/T5KM-WQHS>, <https://doi.org/10.48597/HAPP-X2WN>, <https://doi.org/10.48597/Z4XT-VYGH>

Lopez Bartolome, M., EMEP, 2015, Inorganics in air and particle phase at Campisabalos, data hosted by EBAS at NILU, Part of DOI: <https://doi.org/10.48597/VK6E-4BE5>, <https://doi.org/10.48597/DBWU-KM3V>, <https://doi.org/10.48597/ADFN-6WX9>, <https://doi.org/10.48597/8M8Y-53KQ>, <https://doi.org/10.48597/HQWK-KQJ6>

Lopez Bartolome, M., EMEP, 2015, Inorganics in air and particle phase at Els Torms, data hosted by EBAS at NILU, Part of DOI: <https://doi.org/10.48597/E8RD-2VU4>, <https://doi.org/10.48597/BYHS-F4ZE>, <https://doi.org/10.48597/623S-SWF7>, <https://doi.org/10.48597/AXCJ-VG89>, <https://doi.org/10.48597/HM9B-YJJC>

Lopez Bartolome, M., EMEP, 2015, Inorganics in air and particle phase at Els Torms, data hosted by EBAS at NILU, Part of DOI: <https://doi.org/10.48597/KWYD-5FJ3>, <https://doi.org/10.48597/94BD-CPKM>, <https://doi.org/10.48597/2SPK-9GUX>, <https://doi.org/10.48597/87CV-Y845>, <https://doi.org/10.48597/RUJ2-QRCT>

Lopez Bartolome, M., EMEP, 2015, Inorganics in air and particle phase at O Saviñao, data hosted by EBAS at NILU, Part of DOI: <https://doi.org/10.48597/8UW6-YGRW>, <https://doi.org/10.48597/DRKE-N98Q>, <https://doi.org/10.48597/BH5A-7WCR>

Lopez Bartolome, M., EMEP, 2015, Inorganics in air and particle phase at O Saviñao, data hosted by EBAS at NILU, Part of DOI: <https://doi.org/10.48597/AK43-C68Z>, <https://doi.org/10.48597/F9A6-9YXQ>, <https://doi.org/10.48597/NTTZ-HVVG>

Lopez Bartolome, M., EMEP, 2015, Inorganics in air and particle phase at Penausende, data hosted by EBAS at NILU, Part of DOI: <https://doi.org/10.48597/PM3B-FXZE>, <https://doi.org/10.48597/P9BQ-DEEK>, <https://doi.org/10.48597/H9PC-RHHF>

Lopez Bartolome, M., EMEP, 2015, Inorganics in air and particle phase at Penausende, data hosted by EBAS at NILU, Part of DOI: <https://doi.org/10.48597/TDHZ-8ARX>, <https://doi.org/10.48597/KXPB-D53P>, <https://doi.org/10.48597/5SNF-45YH>

Lopez Bartolome, M., EMEP, 2015, Inorganics in air and particle phase at San Pablo de los Montes, data hosted by EBAS at NILU, Part of DOI: <https://doi.org/10.48597/5MDD-SHP5>, <https://doi.org/10.48597/URVS-QP8U>, <https://doi.org/10.48597/TZBK-9F9C>, <https://doi.org/10.48597/5Z56-QQRX>, <https://doi.org/10.48597/4WEA-RDAW>

Lopez Bartolome, M., EMEP, 2015, Inorganics in air and particle phase at San Pablo de los Montes, data hosted by EBAS at NILU, Part of DOI: <https://doi.org/10.48597/CBX4-TRW4>, <https://doi.org/10.48597/X4BC-QWNA>, <https://doi.org/10.48597/C8HG-8SBG>, <https://doi.org/10.48597/E2NX-CN4Y>

Lopez Bartolome, M., EMEP, 2015, Inorganics in air and particle phase at San Pablo de los Montes, data hosted by EBAS at NILU, Part of DOI: <https://doi.org/10.48597/EQ4T-TX5E>, <https://doi.org/10.48597/ZXZ9-XEXB>, <https://doi.org/10.48597/CKHH-2HS5>, <https://doi.org/10.48597/5KDF-2DZE>, <https://doi.org/10.48597/F3H6-6VUV>

Lopez Bartolome, M., EMEP, 2015, Inorganics in air and particle phase at San Pablo de los Montes, data hosted by EBAS at NILU, Part of DOI: <https://doi.org/10.48597/ESK5-36FB>, <https://doi.org/10.48597/6BFN-B4MC>, <https://doi.org/10.48597/32G5-V688>, <https://doi.org/10.48597/86DK-7TNQ>, <https://doi.org/10.48597/95JR-6GNA>

Lopez Bartolome, M., EMEP, 2015, Inorganics in air and particle phase at Viznar, data hosted by EBAS at NILU, Part of DOI: <https://doi.org/10.48597/FEQ9-8G9R>, <https://doi.org/10.48597/FN8T-CU8R>, <https://doi.org/10.48597/ZK2F-XKYD>, <https://doi.org/10.48597/U73Q-6Y4D>, <https://doi.org/10.48597/J5MQ-K8EY>

Lopez Bartolome, M., EMEP, 2015, Inorganics in air and particle phase at Viznar, data hosted by EBAS at NILU, Part of DOI: <https://doi.org/10.48597/G6VR-QECZ>, <https://doi.org/10.48597/5KVY-Z3YE>, <https://doi.org/10.48597/6R2S-67CF>, <https://doi.org/10.48597/PTZ7-WTXJ>, <https://doi.org/10.48597/REF6-9UMX>

Lopez Bartolome, M., EMEP, 2015, Inorganics in air and particle phase at Viznar, data hosted by EBAS at NILU, Part of DOI: <https://doi.org/10.48597/TRBF-WEHZ>, <https://doi.org/10.48597/2HZM-GBDV>, <https://doi.org/10.48597/2K3W-YZTX>, <https://doi.org/10.48597/9MK8-ETXR>, <https://doi.org/10.48597/JA9S-XC6S>

Lopez Bartolome, M., EMEP, 2015, Inorganics in air and particle phase at Viznar, data hosted by EBAS at NILU, Part of DOI: <https://doi.org/10.48597/YWFD-GHVT>, <https://doi.org/10.48597/2RB7-AQDK>, <https://doi.org/10.48597/Z469-Y4NR>, <https://doi.org/10.48597/R8P8-XY7E>, <https://doi.org/10.48597/DCU5-TP9D>

Lopez Bartolome, M., EMEP, 2015, Inorganics in air and particle phase at Zarra, data hosted by EBAS at NILU, Part of DOI: <https://doi.org/10.48597/3F6M-U8UD>, <https://doi.org/10.48597/MZDK-6RWN>, <https://doi.org/10.48597/BFM8-XM6H>

Lopez Bartolome, M., EMEP, 2015, Inorganics in air and particle phase at Zarra, data hosted by EBAS at NILU, Part of DOI: <https://doi.org/10.48597/XRUX-W6YS>, <https://doi.org/10.48597/5E9Q-DBND>, <https://doi.org/10.48597/AG79-463Y>

Lopez Bartolome, M., EMEP, 2015, OC/EC at Campisabalos, data hosted by EBAS at NILU, Part of DOI: <https://doi.org/10.48597/B966-WQDS>, <https://doi.org/10.48597/YVP4-TXWP>

Lopez Bartolome, M., EMEP, 2015, OC/EC at San Pablo de los Montes, data hosted by EBAS at NILU, Part of DOI: <https://doi.org/10.48597/NNA3-ZMTB>, <https://doi.org/10.48597/RSPZ-QFJY>

Lopez Bartolome, M., EMEP, 2015, Organic\_carbon at Campisabalos, data hosted by EBAS at NILU, Part of DOI: <https://doi.org/10.48597/YUZJ-89G8>

Lopez Bartolome, M., EMEP, 2015, Pm10\_mass at Campisabalos, data hosted by EBAS at NILU, Part of DOI: <https://doi.org/10.48597/B44Q-NSAQ>

Lopez Bartolome, M., EMEP, 2015, Pm10\_mass at Campisabalos, data hosted by EBAS at NILU, Part of DOI: <https://doi.org/10.48597/UTCG-D6P8>

Lopez Bartolome, M., EMEP, 2015, Pm10\_mass at O Saviñao, data hosted by EBAS at NILU, Part of DOI: <https://doi.org/10.48597/9HF3-JDSJ>

Lopez Bartolome, M., EMEP, 2015, Pm10\_mass at Penausende, data hosted by EBAS at NILU, Part of DOI: <https://doi.org/10.48597/XAAD-PQUH>

Lopez Bartolome, M., EMEP, 2015, Pm10\_mass at Zarra, data hosted by EBAS at NILU, Part of DOI: <https://doi.org/10.48597/J3ND-UCY2>

Lopez Bartolome, M., EMEP, 2015, Pm25\_mass at Barcarrota, data hosted by EBAS at NILU, Part of DOI: <https://doi.org/10.48597/4YJ8-C3YC>

Lopez Bartolome, M., EMEP, 2015, Pm25\_mass at Barcarrota, data hosted by EBAS at NILU, Part of DOI: <https://doi.org/10.48597/ZDB6-QCXA>

Lopez Bartolome, M., EMEP, 2015, Pm25\_mass at Cabo de Creus, data hosted by EBAS at NILU, Part of DOI: <https://doi.org/10.48597/YKA7-UKYR>

Lopez Bartolome, M., EMEP, 2015, Pm25\_mass at Cabo de Creus, data hosted by EBAS at NILU, Part of DOI: <https://doi.org/10.48597/ZXRB-A755>

Lopez Bartolome, M., EMEP, 2015, Pm25\_mass at Campisabalos, data hosted by EBAS at NILU, Part of DOI: <https://doi.org/10.48597/MJAE-ZAFR>

Lopez Bartolome, M., EMEP, 2015, Pm25\_mass at Campisabalos, data hosted by EBAS at NILU, Part of DOI: <https://doi.org/10.48597/W8RP-2EDN>

Lopez Bartolome, M., EMEP, 2015, Pm25\_mass at Els Torms, data hosted by EBAS at NILU, Part of DOI: <https://doi.org/10.48597/6D3A-TX5M>

Lopez Bartolome, M., EMEP, 2015, Pm25\_mass at Els Torms, data hosted by EBAS at NILU, Part of DOI: <https://doi.org/10.48597/CPRU-XRR6>

Lopez Bartolome, M., EMEP, 2015, Pm25\_mass at Mahón, data hosted by EBAS at NILU, Part of DOI: <https://doi.org/10.48597/AYF4-SD6N>

Lopez Bartolome, M., EMEP, 2015, Pm25\_mass at O Saviñao, data hosted by EBAS at NILU, Part of DOI: <https://doi.org/10.48597/59E9-84U3>

Lopez Bartolome, M., EMEP, 2015, Pm25\_mass at O Saviñao, data hosted by EBAS at NILU, Part of DOI: <https://doi.org/10.48597/KRGG-VBV3>

Lopez Bartolome, M., EMEP, 2015, Pm25\_mass at Penausende, data hosted by EBAS at NILU, Part of DOI: <https://doi.org/10.48597/FZPZ-TBK4>

Lopez Bartolome, M., EMEP, 2015, Pm25\_mass at Penausende, data hosted by EBAS at NILU, Part of DOI: <https://doi.org/10.48597/WBA2-WUV6>

Lopez Bartolome, M., EMEP, 2015, Pm25\_mass at San Pablo de los Montes, data hosted by EBAS at NILU, Part of DOI: <https://doi.org/10.48597/7Z6F-G3RR>

Lopez Bartolome, M., EMEP, 2015, Pm25\_mass at Víznar, data hosted by EBAS at NILU, Part of DOI: <https://doi.org/10.48597/F6RJ-FWHM>

Lopez Bartolome, M., EMEP, 2015, Pm25\_mass at Víznar, data hosted by EBAS at NILU, Part of DOI: <https://doi.org/10.48597/ZW9V-AK9G>

Lopez Bartolome, M., EMEP, 2015, Pm25\_mass at Zarra, data hosted by EBAS at NILU, Part of DOI: <https://doi.org/10.48597/JDHK-YAZE>

Lopez Bartolome, M., EMEP, 2015, Pm25\_mass at Zarra, data hosted by EBAS at NILU, Part of DOI: <https://doi.org/10.48597/YYBT-BM2E>

Lopez Bartolome, M., EMEP, 2016, Ammonium at Campisabalos, data hosted by EBAS at NILU, Part of DOI: <https://doi.org/10.48597/U3XV-GU5B>

Lopez Bartolome, M., EMEP, 2016, Ammonium at Els Torms, data hosted by EBAS at NILU, Part of DOI: <https://doi.org/10.48597/BXNN-JBJD>

Lopez Bartolome, M., EMEP, 2016, Ammonium at San Pablo de los Montes, data hosted by EBAS at NILU, Part of DOI: <https://doi.org/10.48597/BCPF-G9T4>

Lopez Bartolome, M., EMEP, 2016, Ammonium at Víznar, data hosted by EBAS at NILU, Part of DOI: <https://doi.org/10.48597/YMQ5-FH3K>

Lopez Bartolome, M., EMEP, 2016, Inorganics in air and particle phase at Barcarrota, data hosted by EBAS at NILU, Part of DOI: <https://doi.org/10.48597/7UV3-PDJS>, <https://doi.org/10.48597/H6RE-QJCB>, <https://doi.org/10.48597/Y8HZ-G9RS>

Lopez Bartolome, M., EMEP, 2016, Inorganics in air and particle phase at Cabo de Creus, data hosted by EBAS at NILU, Part of DOI: <https://doi.org/10.48597/WK3P-W5BY>, <https://doi.org/10.48597/RH38-RN4E>, <https://doi.org/10.48597/NKZB-QC7X>

Lopez Bartolome, M., EMEP, 2016, Inorganics in air and particle phase at Campisabalos, data hosted by EBAS at NILU, Part of DOI: <https://doi.org/10.48597/BUJE-5NW8>, <https://doi.org/10.48597/4NN7-GZHV>, <https://doi.org/10.48597/QHS3-EVA6>, <https://doi.org/10.48597/HAPP-X2WN>, <https://doi.org/10.48597/8DC4-666F>

Lopez Bartolome, M., EMEP, 2016, Inorganics in air and particle phase at Campisabalos, data hosted by EBAS at NILU, Part of DOI: <https://doi.org/10.48597/HEBM-8TJR>, <https://doi.org/10.48597/8S4A-VDZ6>, <https://doi.org/10.48597/6ZN8-VTZD>, <https://doi.org/10.48597/MQZK-6KTT>, <https://doi.org/10.48597/H75V-DN8Z>

Lopez Bartolome, M., EMEP, 2016, Inorganics in air and particle phase at Els Torms, data hosted by EBAS at NILU, Part of DOI: <https://doi.org/10.48597/JR6D-F5WF>, <https://doi.org/10.48597/NMH6-SBYT>, <https://doi.org/10.48597/2FWB-E39R>, <https://doi.org/10.48597/FWCM-VWJ4>, <https://doi.org/10.48597/5E2C-M2KD>

Lopez Bartolome, M., EMEP, 2016, Inorganics in air and particle phase at Els Torms, data hosted by EBAS at NILU, Part of DOI: <https://doi.org/10.48597/Q6ZT-GJU7>, <https://doi.org/10.48597/PTHU-NFXP>, <https://doi.org/10.48597/C6XJ-6E4J>, <https://doi.org/10.48597/7DJ8-7A5D>, <https://doi.org/10.48597/H3AD-HWFF>

Lopez Bartolome, M., EMEP, 2016, Inorganics in air and particle phase at Mahón, data hosted by EBAS at NILU, Part of DOI: <https://doi.org/10.48597/NA6P-E4TU>, <https://doi.org/10.48597/R7NS-DYKS>, <https://doi.org/10.48597/69QD-B4VW>

Lopez Bartolome, M., EMEP, 2016, Inorganics in air and particle phase at O Saviñao, data hosted by EBAS at NILU, Part of DOI: <https://doi.org/10.48597/AK43-C68Z>, <https://doi.org/10.48597/F9A6-9YXQ>, <https://doi.org/10.48597/NTTZ-HVVG>

Lopez Bartolome, M., EMEP, 2016, Inorganics in air and particle phase at Penausende, data hosted by EBAS at NILU, Part of DOI: <https://doi.org/10.48597/TDHz-8ARX>, <https://doi.org/10.48597/KXPD-D53P>, <https://doi.org/10.48597/5SNF-45YH>

Lopez Bartolome, M., EMEP, 2016, Inorganics in air and particle phase at San Pablo de los Montes, data hosted by EBAS at NILU, Part of DOI: <https://doi.org/10.48597/HMTJ-QQAJ>, <https://doi.org/10.48597/RVNJ-CZH5>, <https://doi.org/10.48597/9A5N-6ZSR>, <https://doi.org/10.48597/TKCY-YSXN>, <https://doi.org/10.48597/QENJ-TMWE>

Lopez Bartolome, M., EMEP, 2016, Inorganics in air and particle phase at San Pablo de los Montes, data hosted by EBAS at NILU, Part of DOI: <https://doi.org/10.48597/SV2W-758J>, <https://doi.org/10.48597/RVVR-EXR2>, <https://doi.org/10.48597/WS53-NRMN>, <https://doi.org/10.48597/ZKNT-9ZWK>, <https://doi.org/10.48597/HCKR-NWDR>

Lopez Bartolome, M., EMEP, 2016, Inorganics in air and particle phase at Víznar, data hosted by EBAS at NILU, Part of DOI: <https://doi.org/10.48597/2ZAT-QDJS>, <https://doi.org/10.48597/YGTE-JJNX>, <https://doi.org/10.48597/GPPU-PU2J>, <https://doi.org/10.48597/8CNE-E6J9>, <https://doi.org/10.48597/WS82-JRGE>

Lopez Bartolome, M., EMEP, 2016, Inorganics in air and particle phase at Víznar, data hosted by EBAS at NILU, Part of DOI: <https://doi.org/10.48597/CDDW-YGVH>, <https://doi.org/10.48597/XY92-4JCW>, <https://doi.org/10.48597/W3ZP-KC2E>, <https://doi.org/10.48597/Y3ST-9NEK>, <https://doi.org/10.48597/PJHU-3DBH>

Lopez Bartolome, M., EMEP, 2016, Inorganics in air and particle phase at Zarra, data hosted by EBAS at NILU, Part of DOI: <https://doi.org/10.48597/XRUX-W6YS>, <https://doi.org/10.48597/5E9Q-DBND>, <https://doi.org/10.48597/AG79-463Y>

Lopez Bartolome, M., EMEP, 2016, OC/EC at Campisabalos, data hosted by EBAS at NILU, Part of DOI: <https://doi.org/10.48597/JJZY-4XH5>, <https://doi.org/10.48597/R7EN-P9XP>

Lopez Bartolome, M., EMEP, 2016, Pm10\_mass at Campisabalos, data hosted by EBAS at NILU, Part of DOI: <https://doi.org/10.48597/B44Q-NSAQ>

Lopez Bartolome, M., EMEP, 2016, Pm10\_mass at O Saviñao, data hosted by EBAS at NILU, Part of DOI: <https://doi.org/10.48597/4NMA-MGQW>

Lopez Bartolome, M., EMEP, 2016, Pm10\_mass at Penausende, data hosted by EBAS at NILU, Part of DOI: <https://doi.org/10.48597/2MMK-TKAP>

Lopez Bartolome, M., EMEP, 2016, Pm10\_mass at Zarra, data hosted by EBAS at NILU, Part of DOI: <https://doi.org/10.48597/XK26-EJEA>

Lopez Bartolome, M., EMEP, 2016, Pm25\_mass at Barcarrota, data hosted by EBAS at NILU, Part of DOI: <https://doi.org/10.48597/4YJ8-C3YC>

Lopez Bartolome, M., EMEP, 2016, Pm25\_mass at Cabo de Creus, data hosted by EBAS at NILU, Part of DOI: <https://doi.org/10.48597/YKA7-UKYR>

Lopez Bartolome, M., EMEP, 2016, Pm25\_mass at Campisabalos, data hosted by EBAS at NILU, Part of DOI: <https://doi.org/10.48597/W8RP-2EDN>

Lopez Bartolome, M., EMEP, 2016, Pm25\_mass at Els Torms, data hosted by EBAS at NILU, Part of DOI: <https://doi.org/10.48597/6D3A-TX5M>

Lopez Bartolome, M., EMEP, 2016, Pm25\_mass at Mahón, data hosted by EBAS at NILU, Part of DOI: <https://doi.org/10.48597/GD6H-QSXX>

Lopez Bartolome, M., EMEP, 2016, Pm25\_mass at O Saviñao, data hosted by EBAS at NILU, Part of DOI: <https://doi.org/10.48597/59E9-84U3>

Lopez Bartolome, M., EMEP, 2016, Pm25\_mass at Penausende, data hosted by EBAS at NILU, Part of DOI: <https://doi.org/10.48597/FZPZ-TBK4>

Lopez Bartolome, M., EMEP, 2016, Pm25\_mass at San Pablo de los Montes, data hosted by EBAS at NILU, Part of DOI: <https://doi.org/10.48597/8JY6-R22T>

Lopez Bartolome, M., EMEP, 2016, Pm25\_mass at Víznar, data hosted by EBAS at NILU, Part of DOI: <https://doi.org/10.48597/9H9P-MFJ8>

Lopez Bartolome, M., EMEP, 2016, Pm25\_mass at Zarra, data hosted by EBAS at NILU, Part of DOI: <https://doi.org/10.48597/YYBT-BM2E>

Lopez Bartolome, M., EMEP, 2017, Inorganics in air and particle phase at Campisabalos, data hosted by EBAS at NILU, Part of DOI: <https://doi.org/10.48597/HEBM-8TJR>, <https://doi.org/10.48597/8S4A-VDZ6>, <https://doi.org/10.48597/6ZN8-VTZD>, <https://doi.org/10.48597/MQZK-6KTT>, <https://doi.org/10.48597/H75V-DN8Z>

Lopez Bartolome, M., EMEP, 2017, Inorganics in air and particle phase at Els Torms, data hosted by EBAS at NILU, Part of DOI: <https://doi.org/10.48597/JR6D-F5WF>, <https://doi.org/10.48597/NMH6-SBYT>, <https://doi.org/10.48597/2FWB-E39R>, <https://doi.org/10.48597/FWCM-VWJ4>, <https://doi.org/10.48597/5E2C-M2KD>

Lopez Bartolome, M., EMEP, 2015, Pm10\_mass at O Saviñao, data hosted by EBAS at NILU, Part of DOI: <https://doi.org/10.48597/4NMA-MGQW>

Lopez Bartolome, M., EMEP, 2015, Pm10\_mass at Penausende, data hosted by EBAS at NILU, Part of DOI: <https://doi.org/10.48597/2MMK-TKAP>

Lopez Bartolome, M., EMEP, 2015, Pm10\_mass at Zarra, data hosted by EBAS at NILU, Part of DOI: <https://doi.org/10.48597/XK26-EJEA>

Lopez, B., CAMP, EMEP, 2012, Inorganics in air and particle phase at Niembro, data hosted by EBAS at NILU, Part of DOI: <https://doi.org/10.48597/GBAA-Z6J9>

Lopez, B., CAMP, EMEP, 2012, Inorganics in air and particle phase at Noia, data hosted by EBAS at NILU, Part of DOI: <https://doi.org/10.48597/S3Y5-EQYF>

Lopez, B., CAMP, EMEP, 2018, Ammonium at Niembro, data hosted by EBAS at NILU, Part of DOI: <https://doi.org/10.48597/NZH4-Y982>

Lopez, B., CAMP, EMEP, 2018, Inorganics in air and particle phase at Doñana, data hosted by EBAS at NILU, Part of DOI: <https://doi.org/10.48597/96E8-8MEX>, <https://doi.org/10.48597/KN5C-ZRQ9>, <https://doi.org/10.48597/FFSN-Y9D9>

Lopez, B., CAMP, EMEP, 2018, Inorganics in air and particle phase at Niembro, data hosted by EBAS at NILU, Part of DOI: <https://doi.org/10.48597/2S4P-YBPQ>, <https://doi.org/10.48597/NJTP-MJWW>, <https://doi.org/10.48597/FCV7-FGQ7>, <https://doi.org/10.48597/NQTQ-X3K2>, <https://doi.org/10.48597/68T3-EXSF>

Lopez, B., CAMP, EMEP, 2018, Inorganics in air and particle phase at Niembro, data hosted by EBAS at NILU, Part of DOI: <https://doi.org/10.48597/2S4P-YBPQ>, <https://doi.org/10.48597/NQTQ-X3K2>



Lopez, B., CAMP, EMEP, 2018, Inorganics in air and particle phase at Niembro, data hosted by EBAS at NILU, Part of DOI: <https://doi.org/10.48597/KAND-TCRG>, <https://doi.org/10.48597/455K-K35V>, <https://doi.org/10.48597/7FWV-AT6J>, <https://doi.org/10.48597/PPSK-XJJY>, <https://doi.org/10.48597/T98A-K3HK>

Lopez, B., CAMP, EMEP, 2018, Inorganics in air and particle phase at Noia, data hosted by EBAS at NILU, Part of DOI: <https://doi.org/10.48597/GWYP-6GFV>, <https://doi.org/10.48597/DHGS-A3UP>, <https://doi.org/10.48597/B242-H84H>

Lopez, B., CAMP, EMEP, 2018, Pm25\_mass at Niembro, data hosted by EBAS at NILU, Part of DOI: <https://doi.org/10.48597/GNTJ-CEEH>

Lopez, B., CAMP, EMEP, 2019, Ammonium at Niembro, data hosted by EBAS at NILU, Part of DOI: <https://doi.org/10.48597/NZH4-Y982>

Lopez, B., CAMP, EMEP, 2019, Inorganics in air and particle phase at Doñana, data hosted by EBAS at NILU, Part of DOI: <https://doi.org/10.48597/96E8-8MEX>, <https://doi.org/10.48597/KN5C-ZRQ9>, <https://doi.org/10.48597/FFSN-Y9D9>

Lopez, B., CAMP, EMEP, 2019, Inorganics in air and particle phase at Niembro, data hosted by EBAS at NILU, Part of DOI: <https://doi.org/10.48597/2S4P-YBPQ>, <https://doi.org/10.48597/NJTP-MJWW>, <https://doi.org/10.48597/FCV7-FGQ7>, <https://doi.org/10.48597/NQTQ-X3K2>, <https://doi.org/10.48597/68T3-EXSF>

Lopez, B., CAMP, EMEP, 2019, Inorganics in air and particle phase at Niembro, data hosted by EBAS at NILU, Part of DOI: <https://doi.org/10.48597/KAND-TCRG>, <https://doi.org/10.48597/455K-K35V>, <https://doi.org/10.48597/7FWV-AT6J>, <https://doi.org/10.48597/PPSK-XJJY>, <https://doi.org/10.48597/T98A-K3HK>

Lopez, B., CAMP, EMEP, 2019, Inorganics in air and particle phase at Noia, data hosted by EBAS at NILU, Part of DOI: <https://doi.org/10.48597/GWYP-6GFV>, <https://doi.org/10.48597/DHGS-A3UP>, <https://doi.org/10.48597/B242-H84H>

Lopez, B., CAMP, EMEP, 2019, Pm25\_mass at Niembro, data hosted by EBAS at NILU, Part of DOI: <https://doi.org/10.48597/GNTJ-CEEH>

Lopez, B., CAMP, EMEP, GAW-WDCA, 2012, Pm10\_mass at Noia, data hosted by EBAS at NILU, Part of DOI: <https://doi.org/10.48597/S3Y5-EQYF>

Lopez, B., EMEP, 2012, Inorganics in air and particle phase at Cabo de Creus, data hosted by EBAS at NILU, Part of DOI: <https://doi.org/10.48597/E4JE-BJQT>

Lopez, B., EMEP, 2012, Inorganics in air and particle phase at Campisabalos, data hosted by EBAS at NILU, Part of DOI: <https://doi.org/10.48597/EMTA-M39M>

Lopez, B., EMEP, 2012, Inorganics in air and particle phase at Víznar, data hosted by EBAS at NILU, Part of DOI: <https://doi.org/10.48597/EAHT-AE5H>

Lopez, B., EMEP, 2012, OC/EC at Campisabalos, data hosted by EBAS at NILU, Part of DOI: <https://doi.org/10.48597/NK7P-X6NA>

Lopez, B., EMEP, 2012, Pm25\_mass at Barcarrota, data hosted by EBAS at NILU, Part of DOI: <https://doi.org/10.48597/WUNH-Z74W>

Lopez, B., EMEP, 2012, Pm25\_mass at Campisabalos, data hosted by EBAS at NILU, Part of DOI: <https://doi.org/10.48597/KNE8-VEAN>

Lopez, B., EMEP, 2012, Pm25\_mass at Els Torms, data hosted by EBAS at NILU, Part of DOI: <https://doi.org/10.48597/YP5A-6KQ8>

Lopez, B., EMEP, 2012, Pm25\_mass at O Saviñao, data hosted by EBAS at NILU, Part of DOI: <https://doi.org/10.48597/8F2T-P97A>

Lopez, B., EMEP, 2012, Pm25\_mass at Penausende, data hosted by EBAS at NILU, Part of DOI: <https://doi.org/10.48597/WW5D-7XEX>

Lopez, B., EMEP, 2012, Pm25\_mass at Zarra, data hosted by EBAS at NILU, Part of DOI: <https://doi.org/10.48597/EYBE-NSHZ>

Lopez, B., EMEP, 2012, Sulphate\_total at Mahón, data hosted by EBAS at NILU, Part of DOI: <https://doi.org/10.48597/PEER-77HG>

Lopez, B., EMEP, 2018, Ammonium at Campisabalos, data hosted by EBAS at NILU, Part of DOI: <https://doi.org/10.48597/EAAA-DKCI>

Lopez, B., EMEP, 2018, Ammonium at Els Torms, data hosted by EBAS at NILU, Part of DOI: <https://doi.org/10.48597/BXNN-JBJD>

Lopez, B., EMEP, 2018, Ammonium at San Pablo de los Montes, data hosted by EBAS at NILU, Part of DOI: <https://doi.org/10.48597/BCPF-G9T4>

Lopez, B., EMEP, 2018, Ammonium at Víznar, data hosted by EBAS at NILU, Part of DOI: <https://doi.org/10.48597/YMQ5-FH3K>

Lopez, B., EMEP, 2018, Inorganics in air and particle phase at Barcarrota, data hosted by EBAS at NILU, Part of DOI: <https://doi.org/10.48597/7UV3-PDJS>, <https://doi.org/10.48597/H6RE-QJCB>, <https://doi.org/10.48597/Y8HZ-G9RS>

Lopez, B., EMEP, 2018, Inorganics in air and particle phase at Cabo de Creus, data hosted by EBAS at NILU, Part of DOI: <https://doi.org/10.48597/WK3P-W5BY>, <https://doi.org/10.48597/RH38-RN4E>, <https://doi.org/10.48597/NKZB-QC7X>

Lopez, B., EMEP, 2018, Inorganics in air and particle phase at Campisabalos, data hosted by EBAS at NILU, Part of DOI: <https://doi.org/10.48597/4BKP-7W9F>, <https://doi.org/10.48597/EGUK-U2KK>, <https://doi.org/10.48597/Y8Z3-XP3G>, <https://doi.org/10.48597/WVHP-WU69>, <https://doi.org/10.48597/4KYA-VXXW>

Lopez, B., EMEP, 2018, Inorganics in air and particle phase at Campisabalos, data hosted by EBAS at NILU, Part of DOI: <https://doi.org/10.48597/HEBM-8TJR>, <https://doi.org/10.48597/8S4A-VDZ6>, <https://doi.org/10.48597/6ZN8-VTZD>, <https://doi.org/10.48597/MQZK-6KTT>, <https://doi.org/10.48597/H75V-DN8Z>

Lopez, B., EMEP, 2018, Inorganics in air and particle phase at Els Torms, data hosted by EBAS at NILU, Part of DOI: <https://doi.org/10.48597/JR6D-F5WF>, <https://doi.org/10.48597/NMH6-SBYT>, <https://doi.org/10.48597/2FWB-E39R>, <https://doi.org/10.48597/FWCM-VWJ4>, <https://doi.org/10.48597/5E2C-M2KD>

Lopez, B., EMEP, 2018, Inorganics in air and particle phase at Els Torms, data hosted by EBAS at NILU, Part of DOI: <https://doi.org/10.48597/MFTD-UYAK>, <https://doi.org/10.48597/KS2C-394J>, <https://doi.org/10.48597/ZHBJ-9M29>, <https://doi.org/10.48597/RFCV-4DNK>, <https://doi.org/10.48597/DJ8C-M9W8>

Lopez, B., EMEP, 2018, Inorganics in air and particle phase at Mahón, data hosted by EBAS at NILU, Part of DOI: <https://doi.org/10.48597/NA6P-E4TU>, <https://doi.org/10.48597/R7NS-DYKS>, <https://doi.org/10.48597/69QD-B4VW>

Lopez, B., EMEP, 2018, Inorganics in air and particle phase at O Saviñao, data hosted by EBAS at NILU, Part of DOI: <https://doi.org/10.48597/AK43-C68Z>, <https://doi.org/10.48597/F9A6-9YXQ>, <https://doi.org/10.48597/NTTZ-HVVG>

Lopez, B., EMEP, 2018, Inorganics in air and particle phase at Penausende, data hosted by EBAS at NILU, Part of DOI: <https://doi.org/10.48597/TDHZ-8ARX>, <https://doi.org/10.48597/KXPD-D53P>, <https://doi.org/10.48597/5SNF-45YH>

Lopez, B., EMEP, 2018, Inorganics in air and particle phase at San Pablo de los Montes, data hosted by EBAS at NILU, Part of DOI: <https://doi.org/10.48597/QZSV-CVG6>, <https://doi.org/10.48597/F99V-P4PZ>, <https://doi.org/10.48597/3Q93-PT4F>, <https://doi.org/10.48597/GFPF-FXGC>, <https://doi.org/10.48597/ZTZS-QZFH>

Lopez, B., EMEP, 2018, Inorganics in air and particle phase at San Pablo de los Montes, data hosted by EBAS at NILU, Part of DOI: <https://doi.org/10.48597/SV2W-758J>, <https://doi.org/10.48597/RVVR-EXR2>, <https://doi.org/10.48597/WS53-NRMN>, <https://doi.org/10.48597/ZKNT-9ZWK>, <https://doi.org/10.48597/HCKR-NWDR>

Lopez, B., EMEP, 2018, Inorganics in air and particle phase at Víznar, data hosted by EBAS at NILU, Part of DOI: <https://doi.org/10.48597/2ZAT-QDJS>, <https://doi.org/10.48597/YGTE-JJNX>, <https://doi.org/10.48597/GPPU-PU2J>, <https://doi.org/10.48597/8CNE-E6J9>, <https://doi.org/10.48597/WS82-JRGE>

Lopez, B., EMEP, 2018, Inorganics in air and particle phase at Víznar, data hosted by EBAS at NILU, Part of DOI: <https://doi.org/10.48597/J2X2-VSK3>, <https://doi.org/10.48597/4KR5-UZBR>, <https://doi.org/10.48597/NC7V-BZHY>, <https://doi.org/10.48597/U3DM-Y83K>, <https://doi.org/10.48597/QHYA-TKMV>

Lopez, B., EMEP, 2018, Inorganics in air and particle phase at Zarra, data hosted by EBAS at NILU, Part of DOI: <https://doi.org/10.48597/XRUX-W6YS>, <https://doi.org/10.48597/5E9Q-DBND>, <https://doi.org/10.48597/AG79-463Y>

Lopez, B., EMEP, 2018, Pm25\_mass at Barcarrota, data hosted by EBAS at NILU, Part of DOI: <https://doi.org/10.48597/4YJ8-C3YC>

Lopez, B., EMEP, 2018, Pm25\_mass at Cabo de Creus, data hosted by EBAS at NILU, Part of DOI: <https://doi.org/10.48597/YKA7-UKYR>

Lopez, B., EMEP, 2018, Pm25\_mass at Campisabalos, data hosted by EBAS at NILU, Part of DOI: <https://doi.org/10.48597/W8RP-2EDN>

Lopez, B., EMEP, 2018, Pm25\_mass at Els Torms, data hosted by EBAS at NILU, Part of DOI: <https://doi.org/10.48597/6D3A-TX5M>

Lopez, B., EMEP, 2018, Pm25\_mass at Mahón, data hosted by EBAS at NILU, Part of DOI: <https://doi.org/10.48597/GD6H-QSXX>

Lopez, B., EMEP, 2018, Pm25\_mass at O Saviñao, data hosted by EBAS at NILU, Part of DOI: <https://doi.org/10.48597/59E9-84U3>

Lopez, B., EMEP, 2018, Pm25\_mass at Penausende, data hosted by EBAS at NILU, Part of DOI: <https://doi.org/10.48597/FZPZ-TBK4>

Lopez, B., EMEP, 2018, Pm25\_mass at San Pablo de los Montes, data hosted by EBAS at NILU, Part of DOI: <https://doi.org/10.48597/8JY6-R22T>

Lopez, B., EMEP, 2018, Pm25\_mass at Víznar, data hosted by EBAS at NILU, Part of DOI: <https://doi.org/10.48597/9H9P-MFJ8>

Lopez, B., EMEP, 2018, Pm25\_mass at Zarra, data hosted by EBAS at NILU, Part of DOI: <https://doi.org/10.48597/YYBT-BM2E>

Lopez, B., EMEP, 2019, Ammonium at Campisabalos, data hosted by EBAS at NILU, Part of DOI: <https://doi.org/10.48597/U3XV-GU5B>

Lopez, B., EMEP, 2019, Ammonium at Els Torms, data hosted by EBAS at NILU, Part of DOI: <https://doi.org/10.48597/BXNN-JBJD>

Lopez, B., EMEP, 2019, Ammonium at San Pablo de los Montes, data hosted by EBAS at NILU, Part of DOI: <https://doi.org/10.48597/BCPF-G9T4>

Lopez, B., EMEP, 2019, Ammonium at Víznar, data hosted by EBAS at NILU, Part of DOI: <https://doi.org/10.48597/YMQ5-FH3K>

Lopez, B., EMEP, 2019, Inorganics in air and particle phase at Barcarrota, data hosted by EBAS at NILU, Part of DOI: <https://doi.org/10.48597/7UV3-PDJS>, <https://doi.org/10.48597/H6RE-QJCB>, <https://doi.org/10.48597/Y8HZ-G9RS>

Lopez, B., EMEP, 2019, Inorganics in air and particle phase at Cabo de Creus, data hosted by EBAS at NILU, Part of DOI: <https://doi.org/10.48597/WK3P-W5BY>, <https://doi.org/10.48597/RH38-RN4E>, <https://doi.org/10.48597/NKZB-QC7X>

Lopez, B., EMEP, 2019, Inorganics in air and particle phase at Campisabalos, data hosted by EBAS at NILU, Part of DOI: <https://doi.org/10.48597/BUJE-5NW8>, <https://doi.org/10.48597/4NN7-GZHV>, <https://doi.org/10.48597/QHS3-EVA6>, <https://doi.org/10.48597/HAPP-X2WN>, <https://doi.org/10.48597/8DC4-666F>

Lopez, B., EMEP, 2019, Inorganics in air and particle phase at Campisabalos, data hosted by EBAS at NILU, Part of DOI: <https://doi.org/10.48597/HEBM-8TJR>, <https://doi.org/10.48597/8S4A-VDZ6>, <https://doi.org/10.48597/6ZN8-VTZD>, <https://doi.org/10.48597/MQZK-6KTT>, <https://doi.org/10.48597/H75V-DN8Z>

Lopez, B., EMEP, 2019, Inorganics in air and particle phase at Els Torms, data hosted by EBAS at NILU, Part of DOI: <https://doi.org/10.48597/JR6D-F5WF>, <https://doi.org/10.48597/NMH6-SBYT>, <https://doi.org/10.48597/2FWB-E39R>, <https://doi.org/10.48597/FWCM-VWJ4>, <https://doi.org/10.48597/5E2C-M2KD>

Lopez, B., EMEP, 2019, Inorganics in air and particle phase at Els Torms, data hosted by EBAS at NILU, Part of DOI: <https://doi.org/10.48597/Q6ZT-GJU7>, <https://doi.org/10.48597/PTHU-NFXP>, <https://doi.org/10.48597/C6XJ-6E4J>, <https://doi.org/10.48597/7DJ8-7A5D>, <https://doi.org/10.48597/H3AD-HWFF>

Lopez, B., EMEP, 2019, Inorganics in air and particle phase at Mahón, data hosted by EBAS at NILU, Part of DOI: <https://doi.org/10.48597/NA6P-E4TU>, <https://doi.org/10.48597/R7NS-DYKS>, <https://doi.org/10.48597/69QD-B4VW>

Lopez, B., EMEP, 2019, Inorganics in air and particle phase at O Saviñao, data hosted by EBAS at NILU, Part of DOI: <https://doi.org/10.48597/AK43-C68Z>, <https://doi.org/10.48597/F9A6-9YXQ>, <https://doi.org/10.48597/NTTZ-HVVG>

Lopez, B., EMEP, 2019, Inorganics in air and particle phase at Penausende, data hosted by EBAS at NILU, Part of DOI: <https://doi.org/10.48597/TDHz-8ARX>, <https://doi.org/10.48597/KXPD-D53P>, <https://doi.org/10.48597/5SNF-45YH>

Lopez, B., EMEP, 2019, Inorganics in air and particle phase at San Pablo de los Montes, data hosted by EBAS at NILU, Part of DOI: <https://doi.org/10.48597/HMTJ-QQAJ>, <https://doi.org/10.48597/RVNJ-CZH5>, <https://doi.org/10.48597/9A5N-6ZSR>, <https://doi.org/10.48597/TKCY-YSXN>, <https://doi.org/10.48597/QENJ-TMWE>

Lopez, B., EMEP, 2019, Inorganics in air and particle phase at San Pablo de los Montes, data hosted by EBAS at NILU, Part of DOI: <https://doi.org/10.48597/SV2W-758J>, <https://doi.org/10.48597/RVVR-EXR2>, <https://doi.org/10.48597/WS53-NRMN>, <https://doi.org/10.48597/ZKNT-9ZWK>, <https://doi.org/10.48597/HCKR-NWDR>

Lopez, B., EMEP, 2019, Inorganics in air and particle phase at Víznar, data hosted by EBAS at NILU, Part of DOI: <https://doi.org/10.48597/2ZAT-QDJS>, <https://doi.org/10.48597/YGTE-JJNX>, <https://doi.org/10.48597/GPPU-PU2J>, <https://doi.org/10.48597/8CNE-E6J9>, <https://doi.org/10.48597/WS82-JRGE>

Lopez, B., EMEP, 2019, Inorganics in air and particle phase at Víznar, data hosted by EBAS at NILU, Part of DOI: <https://doi.org/10.48597/CDDW-YGVH>, <https://doi.org/10.48597/XY92-4JCW>, <https://doi.org/10.48597/W3ZP-KC2E>, <https://doi.org/10.48597/Y3ST-9NEK>, <https://doi.org/10.48597/PJHU-3DBH>

Lopez, B., EMEP, 2019, Inorganics in air and particle phase at Zarra, data hosted by EBAS at NILU, Part of DOI: <https://doi.org/10.48597/XRUX-W6YS>, <https://doi.org/10.48597/5E9Q-DBND>, <https://doi.org/10.48597/AG79-463Y>

Lopez, B., EMEP, 2019, Pm25\_mass at Barcarrota, data hosted by EBAS at NILU, Part of DOI: <https://doi.org/10.48597/4YJ8-C3YC>

Lopez, B., EMEP, 2019, Pm25\_mass at Cabo de Creus, data hosted by EBAS at NILU, Part of DOI: <https://doi.org/10.48597/YKA7-UKYR>

Lopez, B., EMEP, 2019, Pm25\_mass at Campisabalos, data hosted by EBAS at NILU, Part of DOI: <https://doi.org/10.48597/W8RP-2EDN>

Lopez, B., EMEP, 2019, Pm25\_mass at Els Torms, data hosted by EBAS at NILU, Part of DOI: <https://doi.org/10.48597/6D3A-TX5M>

Lopez, B., EMEP, 2019, Pm25\_mass at Mahón, data hosted by EBAS at NILU, Part of DOI: <https://doi.org/10.48597/GD6H-QSXX>

Lopez, B., EMEP, 2019, Pm25\_mass at O Saviñao, data hosted by EBAS at NILU, Part of DOI: <https://doi.org/10.48597/59E9-84U3>

Lopez, B., EMEP, 2019, Pm25\_mass at Penausende, data hosted by EBAS at NILU, Part of DOI: <https://doi.org/10.48597/FZPZ-TBK4>

Lopez, B., EMEP, 2019, Pm25\_mass at San Pablo de los Montes, data hosted by EBAS at NILU, Part of DOI: <https://doi.org/10.48597/8JY6-R22T>

Lopez, B., EMEP, 2019, Pm25\_mass at Víznar, data hosted by EBAS at NILU, Part of DOI: <https://doi.org/10.48597/9H9P-MFJ8>

Lopez, B., EMEP, 2019, Pm25\_mass at Zarra, data hosted by EBAS at NILU, Part of DOI: <https://doi.org/10.48597/YYBT-BM2E>

Lopez, B., EMEP, 2020, Pm10\_mass at Campisabalos, data hosted by EBAS at NILU, Part of DOI: <https://doi.org/10.48597/W74T-EMGC>

Lopez, B., EMEP, 2020, Pm10\_mass at O Saviñao, data hosted by EBAS at NILU, Part of DOI: <https://doi.org/10.48597/MAPB-HWDC>

Lopez, B., EMEP, 2020, Pm10\_mass at Penausende, data hosted by EBAS at NILU, Part of DOI: <https://doi.org/10.48597/DH5E-NFGE>

Lopez, B., EMEP, 2020, Pm10\_mass at Zarra, data hosted by EBAS at NILU, Part of DOI: <https://doi.org/10.48597/W4F8-JHVW>

Lopez, B., EMEP, GAW-WDCA, 2012, Pm10\_mass at Mahón, data hosted by EBAS at NILU, Part of DOI: <https://doi.org/10.48597/PEER-77HG>

Lopez, B., EMEP, GAW-WDCA, 2012, Pm25\_mass at San Pablo de los Montes, data hosted by EBAS at NILU, Part of DOI: <https://doi.org/10.48597/NMZJ-4DNN>

Lopez, B., Maria, ., CAMP, EMEP, 2013, Inorganics in air and particle phase at Doñana, data hosted by EBAS at NILU, Part of DOI: <https://doi.org/10.48597/638J-E6YQ>

Lopez, B., Maria, ., CAMP, EMEP, 2013, Inorganics in air and particle phase at Niembro, data hosted by EBAS at NILU, Part of DOI: <https://doi.org/10.48597/F3N3-4DZC>

Lopez, B., Maria, ., CAMP, EMEP, 2013, Inorganics in air and particle phase at Niembro, data hosted by EBAS at NILU, Part of DOI: <https://doi.org/10.48597/TCNG-9QPN>

Lopez, B., Maria, ., CAMP, EMEP, 2013, Inorganics in air and particle phase at Noia, data hosted by EBAS at NILU, Part of DOI: <https://doi.org/10.48597/S3Y5-EQYF>

Lopez, B., Maria, ., EMEP, 2013, Ammonium at Campisabalos, data hosted by EBAS at NILU, Part of DOI: <https://doi.org/10.48597/XPGW-VKP3>

Lopez, B., Maria, ., EMEP, 2013, Ammonium at Els Torms, data hosted by EBAS at NILU, Part of DOI: <https://doi.org/10.48597/26FY-HVDZ>

Lopez, B., Maria, ., EMEP, 2013, Ammonium at San Pablo de los Montes, data hosted by EBAS at NILU, Part of DOI: <https://doi.org/10.48597/YZ8E-2E9M>

Lopez, B., Maria, ., EMEP, 2013, Elemental carbon at San Pablo de los Montes, data hosted by EBAS at NILU, Part of DOI: <https://doi.org/10.48597/4NDT-N42E>

Lopez, B., Maria, ., EMEP, 2013, Inorganics in air and particle phase at Barcarrota, data hosted by EBAS at NILU, Part of DOI: <https://doi.org/10.48597/FVR8-YZWY>

Lopez, B., Maria, ., EMEP, 2013, Inorganics in air and particle phase at Cabo de Creus, data hosted by EBAS at NILU, Part of DOI: <https://doi.org/10.48597/E4JE-BJQT>

Lopez, B., Maria, ., EMEP, 2013, Inorganics in air and particle phase at Campisabalos, data hosted by EBAS at NILU, Part of DOI: <https://doi.org/10.48597/HXPU-UBTR>

Lopez, B., Maria, ., EMEP, 2013, Inorganics in air and particle phase at Els Torms, data hosted by EBAS at NILU, Part of DOI: <https://doi.org/10.48597/5D2U-F5QZ>

Lopez, B., Maria, ., EMEP, 2013, Inorganics in air and particle phase at Els Torms, data hosted by EBAS at NILU, Part of DOI: <https://doi.org/10.48597/RFDK-DY37>

Lopez, B., Maria, ., EMEP, 2013, Inorganics in air and particle phase at Mahón, data hosted by EBAS at NILU, Part of DOI: <https://doi.org/10.48597/9YGT-WPUF>

Lopez, B., Maria, ., EMEP, 2013, Inorganics in air and particle phase at Mahón, data hosted by EBAS at NILU, Part of DOI: <https://doi.org/10.48597/PEER-77HG>

Lopez, B., Maria, ., EMEP, 2013, Inorganics in air and particle phase at O Saviñao, data hosted by EBAS at NILU, Part of DOI: <https://doi.org/10.48597/HGPX-V2XY>

Lopez, B., Maria, ., EMEP, 2013, Inorganics in air and particle phase at Penausende, data hosted by EBAS at NILU, Part of DOI: <https://doi.org/10.48597/8DEG-YMK9>

Lopez, B., Maria, ., EMEP, 2013, Inorganics in air and particle phase at San Pablo de los Montes, data hosted by EBAS at NILU, Part of DOI: <https://doi.org/10.48597/C8QB-N28A>

Lopez, B., Maria, ., EMEP, 2013, Inorganics in air and particle phase at San Pablo de los Montes, data hosted by EBAS at NILU, Part of DOI: <https://doi.org/10.48597/EYE4-ZMHZ>

Lopez, B., Maria, ., EMEP, 2013, Inorganics in air and particle phase at San Pablo de los Montes, data hosted by EBAS at NILU, Part of DOI: <https://doi.org/10.48597/VR8G-8U26>

Lopez, B., Maria, ., EMEP, 2013, Inorganics in air and particle phase at Víznar, data hosted by EBAS at NILU, Part of DOI: <https://doi.org/10.48597/4Y8W-BHCS>

Lopez, B., Maria, ., EMEP, 2013, Inorganics in air and particle phase at Víznar, data hosted by EBAS at NILU, Part of DOI: <https://doi.org/10.48597/YTWF-FAM7>

Lopez, B., Maria, ., EMEP, 2013, Inorganics in air and particle phase at Zarra, data hosted by EBAS at NILU, Part of DOI: <https://doi.org/10.48597/PYKH-MKH7>

Lopez, B., Maria, ., EMEP, 2013, Organic carbon at San Pablo de los Montes, data hosted by EBAS at NILU, Part of DOI: <https://doi.org/10.48597/WPFY-Q9XB>

Lopez, B., Maria, ., EMEP, 2013, Pm10\_mass at Barcarrota, data hosted by EBAS at NILU, Part of DOI: <https://doi.org/10.48597/SFU4-CS9T>

Lopez, B., Maria, ., EMEP, 2013, Pm10\_mass at Campisabalos, data hosted by EBAS at NILU, Part of DOI: <https://doi.org/10.48597/RSTY-V7MF>

Lopez, B., Maria, ., EMEP, 2013, Pm10\_mass at Els Torms, data hosted by EBAS at NILU, Part of DOI: <https://doi.org/10.48597/G32K-ZNYY>

Lopez, B., Maria, ., EMEP, 2013, Pm10\_mass at O Saviñao, data hosted by EBAS at NILU, Part of DOI: <https://doi.org/10.48597/4NMA-MGQW>

Lopez, B., Maria, ., EMEP, 2013, Pm10\_mass at Penausende, data hosted by EBAS at NILU, Part of DOI: <https://doi.org/10.48597/2MMK-TKAP>

Lopez, B., Maria, ., EMEP, 2013, Pm10\_mass at Zarra, data hosted by EBAS at NILU, Part of DOI: <https://doi.org/10.48597/KGGA-X9D4>

Lopez, B., Maria, ., EMEP, 2013, Pm25\_mass at Barcarrota, data hosted by EBAS at NILU, Part of DOI: <https://doi.org/10.48597/WUNH-Z74W>

Lopez, B., Maria, ., EMEP, 2013, Pm25\_mass at Campisabalos, data hosted by EBAS at NILU, Part of DOI: <https://doi.org/10.48597/KNE8-VEAN>

Lopez, B., Maria, ., EMEP, 2013, Pm25\_mass at Els Torms, data hosted by EBAS at NILU, Part of DOI: <https://doi.org/10.48597/YP5A-6KQ8>

Lopez, B., Maria, ., EMEP, 2013, Pm25\_mass at O Saviñao, data hosted by EBAS at NILU, Part of DOI: <https://doi.org/10.48597/8F2T-P97A>

Lopez, B., Maria, ., EMEP, 2013, Pm25\_mass at Penausende, data hosted by EBAS at NILU, Part of DOI: <https://doi.org/10.48597/WW5D-7XEX>

Lopez, B., Maria, ., EMEP, 2013, Pm25\_mass at San Pablo de los Montes, data hosted by EBAS at NILU, Part of DOI: <https://doi.org/10.48597/NMZJ-4DNN>

Lopez, B., Maria, ., EMEP, 2013, Pm25\_mass at Zarra, data hosted by EBAS at NILU, Part of DOI: <https://doi.org/10.48597/EYBE-NSHZ>

Lopez, B., Maria, ., EMEP, 2013, Sodium at Campisabalos, data hosted by EBAS at NILU, Part of DOI: <https://doi.org/10.48597/V2RC-WTNC>

Lopez, B., Maria, ., EMEP, 2013, Sodium at Els Torms, data hosted by EBAS at NILU, Part of DOI: <https://doi.org/10.48597/4XZ6-JP7S>

Lopez, B., Maria, ., EMEP, 2013, Sodium at Els Torms, data hosted by EBAS at NILU, Part of DOI: <https://doi.org/10.48597/QSZZ-QHTQ>

Lopez, B., Maria, ., EMEP, 2013, Sodium at San Pablo de los Montes, data hosted by EBAS at NILU, Part of DOI: <https://doi.org/10.48597/MWM6-WFW7>

Lopez, B., Maria, ., EMEP, 2013, Sodium at Vízna, data hosted by EBAS at NILU, Part of DOI: <https://doi.org/10.48597/FBMK-7EQJ>

Lopez, B., Maria, ., EMEP, 2014, Inorganics in air and particle phase at Campisabalos, data hosted by EBAS at NILU, Part of DOI: <https://doi.org/10.48597/DYHY-TY9A>

Lopez, B., Maria, ., EMEP, 2014, Sulphate\_corrected at Campisabalos, data hosted by EBAS at NILU, Part of DOI: <https://doi.org/10.48597/SME9-NR7G>

Lopez, B., Maria, CAMP, EMEP, 2014, Sulphate\_corrected at Niembro, data hosted by EBAS at NILU, Part of DOI: <https://doi.org/10.48597/QWV7-NDKV>

Lopez, B., Maria, EMEP, 2014, Sulphate\_corrected at Campisabalos, data hosted by EBAS at NILU, Part of DOI: <https://doi.org/10.48597/WKRP-7FYJ>

Lopez, B., Maria, EMEP, 2014, Sulphate\_corrected at Els Torms, data hosted by EBAS at NILU, Part of DOI: <https://doi.org/10.48597/94BD-CPKM>

Lopez, B., Maria, EMEP, 2014, Sulphate\_corrected at Els Torms, data hosted by EBAS at NILU, Part of DOI: <https://doi.org/10.48597/XJ75-THHN>

Lopez, B., Maria, EMEP, 2014, Sulphate\_corrected at San Pablo de los Montes, data hosted by EBAS at NILU, Part of DOI: <https://doi.org/10.48597/NXYA-5GS9>

Lopez, B., Maria, EMEP, 2014, Sulphate\_corrected at San Pablo de los Montes, data hosted by EBAS at NILU, Part of DOI: <https://doi.org/10.48597/RJP3-MRUJ>

Lopez, B., Maria, EMEP, 2014, Sulphate\_corrected at Vízna, data hosted by EBAS at NILU, Part of DOI: <https://doi.org/10.48597/SR6U-ZK9A>

Lopez, B., Maria, EMEP, 2014, Sulphate\_corrected at Vízna, data hosted by EBAS at NILU, Part of DOI: <https://doi.org/10.48597/WFNJ-5GC4>

Lungu, M., EMEP, 2019, Pm10\_mass at Leova II, data hosted by EBAS at NILU, Part of DOI: <https://doi.org/10.48597/MJHN-GEY2>

Lungu, M., EMEP, 2020, Pm10\_mass at Leova II, data hosted by EBAS at NILU, Part of DOI: <https://doi.org/10.48597/MJHN-GEY2>

Lungu, M., EMEP, 2023, Pm10\_mass at Leova II, data hosted by EBAS at NILU, Part of DOI: <https://doi.org/10.48597/4WZZ-YCUA>

Machon, A., EMEP, 2020, Pm25\_mass at K-puszt, data hosted by EBAS at NILU, Part of DOI: <https://doi.org/10.48597/QQJY-Q67A>

Machon, A., EMEP, 2021, Pm25\_mass at K-puszt, data hosted by EBAS at NILU, Part of DOI: <https://doi.org/10.48597/QQJY-Q67A>

Machon, A., EMEP, 2022, Pm25\_mass at K-puszt, data hosted by EBAS at NILU, Part of DOI: <https://doi.org/10.48597/QQJY-Q67A>

Machon, A., EMEP, 2023, Pm25\_mass at K-puszt, data hosted by EBAS at NILU, Part of DOI: <https://doi.org/10.48597/QQJY-Q67A>

Maenhaut, W., CAMPAIGN, EMEP, 2004, OC/EC and pm10\_mass at University of Gent, data hosted by EBAS at NILU, Part of DOI: <https://doi.org/10.48597/WHJW-YK67>

Mahdi, R., Asnia, M., Rinaldi, R., GAW-WDCA, 2020, Pm10\_mass at Bukit Kototabang, data hosted by EBAS at NILU, Part of DOI: <https://doi.org/10.48597/7GKZ-H46T>

Mahdi, R., Rinaldi, R., GAW-WDCA, 2022, Pm10\_mass at Bukit Kototabang, data hosted by EBAS at NILU, Part of DOI: <https://doi.org/10.48597/7GKZ-H46T>

Makkonen, U., AMAP, EMEP, 2015, Aluminium at Pallas (Matorova), data hosted by EBAS at NILU, Part of DOI: <https://doi.org/10.48597/5BHQ-KFX8>

Makkonen, U., AMAP, EMEP, 2017, Aluminium at Pallas (Matorova), data hosted by EBAS at NILU, Part of DOI: <https://doi.org/10.48597/5BHQ-KFX8>

Makkonen, U., AMAP, EMEP, 2019, Aluminium at Pallas (Matorova), data hosted by EBAS at NILU, Part of DOI: <https://doi.org/10.48597/5BHQ-KFX8>

Makkonen, U., AMAP, EMEP, 2019, Aluminium at Pallas (Matorova), data hosted by EBAS at NILU, Part of DOI: <https://doi.org/10.48597/XDM4-YJ7E>

Makkonen, U., AMAP, EMEP, 2020, Aluminium at Pallas (Matorova), data hosted by EBAS at NILU, Part of DOI: <https://doi.org/10.48597/5BHQ-KFX8>

Makkonen, U., AMAP, EMEP, 2021, Aluminium at Pallas (Matorova), data hosted by EBAS at NILU, Part of DOI: <https://doi.org/10.48597/5BHQ-KFX8>

Makkonen, U., AMAP, EMEP, 2022, Aluminium at Pallas (Matorova), data hosted by EBAS at NILU, Part of DOI: <https://doi.org/10.48597/5BHQ-KFX8>

Makkonen, U., AMAP, EMEP, 2023, Aluminium at Pallas (Matorova), data hosted by EBAS at NILU, Part of DOI: <https://doi.org/10.48597/5BHQ-KFX8>

Makkonen, U., EMEP, 2015, Aluminium at Ähtäri II, data hosted by EBAS at NILU, Part of DOI: <https://doi.org/10.48597/7BEP-GZD4>

Makkonen, U., EMEP, 2015, Aluminium at Virolahti II, data hosted by EBAS at NILU, Part of DOI: <https://doi.org/10.48597/AFYH-ERAQ>

Makkonen, U., EMEP, 2017, Aluminium at Ähtäri II, data hosted by EBAS at NILU, Part of DOI: <https://doi.org/10.48597/7BEP-GZD4>

Makkonen, U., EMEP, 2017, Aluminium at Virolahti III, data hosted by EBAS at NILU, Part of DOI: <https://doi.org/10.48597/NJTP-W5ST>

Makkonen, U., EMEP, 2018, Aluminium at Ähtäri II, data hosted by EBAS at NILU, Part of DOI: <https://doi.org/10.48597/7BEP-GZD4>

Makkonen, U., EMEP, 2019, Aluminium at Hyytiälä, data hosted by EBAS at NILU, Part of DOI: <https://doi.org/10.48597/D4V8-EFK7>

Makkonen, U., EMEP, 2019, Aluminium at Virolahti III, data hosted by EBAS at NILU, Part of DOI: <https://doi.org/10.48597/S5FW-HDWH>

Makkonen, U., EMEP, 2020, Aluminium at Hyytiälä, data hosted by EBAS at NILU, Part of DOI: <https://doi.org/10.48597/D4V8-EFK7>

Makkonen, U., EMEP, 2020, Aluminium at Virolahti III, data hosted by EBAS at NILU, Part of DOI: <https://doi.org/10.48597/S5FW-HDWH>

Makkonen, U., EMEP, 2021, Aluminium at Hyytiälä, data hosted by EBAS at NILU, Part of DOI: <https://doi.org/10.48597/D4V8-EFK7>

Makkonen, U., EMEP, 2021, Aluminium at Virolahti III, data hosted by EBAS at NILU, Part of DOI: <https://doi.org/10.48597/S5FW-HDWH>

Makkonen, U., EMEP, 2022, Aluminium at Hyytiälä, data hosted by EBAS at NILU, Part of DOI: <https://doi.org/10.48597/D4V8-EFK7>

Makkonen, U., EMEP, 2022, Aluminium at Virolahti III, data hosted by EBAS at NILU, Part of DOI: <https://doi.org/10.48597/S5FW-HDWH>

Makkonen, U., EMEP, 2023, Aluminium at Hyytiälä, data hosted by EBAS at NILU, Part of DOI: <https://doi.org/10.48597/D4V8-EFK7>

Makkonen, U., EMEP, 2023, Aluminium at Virolahti III, data hosted by EBAS at NILU, Part of DOI: <https://doi.org/10.48597/S5FW-HDWH>

Marticorena, B., Diallo, A., Rajot, J. L., Chatenet, B., Féron, A., Gaimoz, C., Maisonneuve, F., Siour, G., Diop, T., and N'Diaye, T.: PM10 concentration, M'Bour, Senegal., Aeris, 2010. <https://doi.org/10.25326/284>;

Martinez, J., CAMP, EMEP, 2003, Pm10\_mass at Niembro, data hosted by EBAS at NILU, Part of DOI: <https://doi.org/10.48597/4T4D-WAX4>

Martinez, J., CAMP, EMEP, 2003, Pm10\_mass at Niembro, data hosted by EBAS at NILU, Part of DOI: <https://doi.org/10.48597/56SJ-XNH2>

Martinez, J., CAMP, EMEP, 2014, Pm10\_mass at Niembro, data hosted by EBAS at NILU, Part of DOI: <https://doi.org/10.48597/4T4D-WAX4>

Martinez, J., EMEP, 2003, PM mass at Barcarrota, data hosted by EBAS at NILU, Part of DOI: <https://doi.org/10.48597/W8FH-GAP8>

Martinez, J., EMEP, 2003, PM mass at Cabo de Creus, data hosted by EBAS at NILU, Part of DOI: <https://doi.org/10.48597/7SXM-3WC2>

Martinez, J., EMEP, 2003, PM mass at Campisabalos, data hosted by EBAS at NILU, Part of DOI: <https://doi.org/10.48597/5SJG-2XSP>

Martinez, J., EMEP, 2003, PM mass at Els Torms, data hosted by EBAS at NILU, Part of DOI: <https://doi.org/10.48597/56FX-P83W>

Martinez, J., EMEP, 2003, PM mass at O Saviñao, data hosted by EBAS at NILU, Part of DOI: <https://doi.org/10.48597/X6A6-DKQN>

Martinez, J., EMEP, 2003, PM mass at Penausende, data hosted by EBAS at NILU, Part of DOI: <https://doi.org/10.48597/KJBC-H59D>

Martinez, J., EMEP, 2003, Pm10\_mass at Barcarrota, data hosted by EBAS at NILU, Part of DOI: <https://doi.org/10.48597/6V8W-N9VM>

Martinez, J., EMEP, 2003, Pm10\_mass at Cabo de Creus, data hosted by EBAS at NILU, Part of DOI: <https://doi.org/10.48597/ESER-RX9T>

Martinez, J., EMEP, 2003, Pm10\_mass at Campisabalos, data hosted by EBAS at NILU, Part of DOI: <https://doi.org/10.48597/99EW-ZMK7>

Martinez, J., EMEP, 2003, Pm10\_mass at Els Torms, data hosted by EBAS at NILU, Part of DOI: <https://doi.org/10.48597/CCQY-JJTN>

Martinez, J., EMEP, 2003, Pm10\_mass at O Saviñao, data hosted by EBAS at NILU, Part of DOI: <https://doi.org/10.48597/V64X-VYPB>

Martinez, J., EMEP, 2003, Pm10\_mass at Penausende, data hosted by EBAS at NILU, Part of DOI: <https://doi.org/10.48597/AFH9-GQ7C>

Martinez, J., EMEP, 2003, Pm10\_mass at Risco Llamó, data hosted by EBAS at NILU, Part of DOI: <https://doi.org/10.48597/KC7S-5HN4>

Martinez, J., EMEP, 2003, Pm10\_mass at Risco Llamó, data hosted by EBAS at NILU, Part of DOI: <https://doi.org/10.48597/VHKW-AH49>

Martinez, J., EMEP, 2003, Pm10\_mass at Víznar, data hosted by EBAS at NILU, Part of DOI: <https://doi.org/10.48597/2WRW-NF2U>

Martinez, J., EMEP, 2003, Pm10\_mass at Víznar, data hosted by EBAS at NILU, Part of DOI: <https://doi.org/10.48597/9YF2-KPGE>

Martinez, J., EMEP, 2006, PM mass at Zarra, data hosted by EBAS at NILU, Part of DOI: <https://doi.org/10.48597/WV9S-FVKC>

Martinez, J., EMEP, 2006, Pm10\_mass at Zarra, data hosted by EBAS at NILU, Part of DOI: <https://doi.org/10.48597/CEEH-7AT3>

Martinez, J., EMEP, 2006, Pm10\_mass at Zarra, data hosted by EBAS at NILU, Part of DOI: <https://doi.org/10.48597/XFCX-DPN5>

Martinez, J., EMEP, 2014, PM mass at Barcarrota, data hosted by EBAS at NILU, Part of DOI: <https://doi.org/10.48597/W8FH-GAP8>

Martinez, J., EMEP, 2014, PM mass at Cabo de Creus, data hosted by EBAS at NILU, Part of DOI: <https://doi.org/10.48597/7SXM-3WC2>

Martinez, J., EMEP, 2014, PM mass at Campisabalos, data hosted by EBAS at NILU, Part of DOI: <https://doi.org/10.48597/5SJG-2XSP>

Martinez, J., EMEP, 2014, PM mass at Els Torms, data hosted by EBAS at NILU, Part of DOI: <https://doi.org/10.48597/56FX-P83W>

Martinez, J., EMEP, 2014, PM mass at O Saviñao, data hosted by EBAS at NILU, Part of DOI: <https://doi.org/10.48597/X6A6-DKQN>

Martinez, J., EMEP, 2014, PM mass at Penausende, data hosted by EBAS at NILU, Part of DOI: <https://doi.org/10.48597/KJBC-H59D>

Martinez, J., EMEP, 2014, Pm10\_mass at Risco Llamó, data hosted by EBAS at NILU, Part of DOI: <https://doi.org/10.48597/KC7S-5HN4>

Martinez, J., EMEP, 2014, Pm10\_mass at Víznar, data hosted by EBAS at NILU, Part of DOI: <https://doi.org/10.48597/9YF2-KPGE>

Martins Dos Santos, S., EMEP, 2023, Pm25\_mass at Ispra, data hosted by EBAS at NILU, Part of DOI: <https://doi.org/10.48597/TUVA-W8RZ>

Martinsson, J., ACTRIS, EMEP, GAW-WDCA, 2015, OC/EC at Vavíhill, data hosted by EBAS at NILU, Part of DOI: <https://doi.org/10.48597/ETNX-F5WN>, <https://doi.org/10.48597/ZEP7-DTNK>, <https://doi.org/10.48597/JJRQ-QD7R>, <https://doi.org/10.48597/GHBZ-KS62>, <https://doi.org/10.48597/Z9MM-SCWK>, <https://doi.org/10.48597/F77P-VN6U>, <https://doi.org/10.48597/5AA5-M6N2>, <https://doi.org/10.48597/BCM2-JM58>, <https://doi.org/10.48597/NVV8-EKCX>, <https://doi.org/10.48597/GEZR-U3K7>, <https://doi.org/10.48597/5SET-TQNG>, <https://doi.org/10.48597/C6DJ-8G38>, <https://doi.org/10.48597/ZAWF-JM6A>, <https://doi.org/10.48597/CMM8-7FTF>

Martinsson, J., ACTRIS, EMEP, GAW-WDCA, 2015, OC/EC at Vavíhill, data hosted by EBAS at NILU, Part of DOI: <https://doi.org/10.48597/MSWF-W2WQ>

Martinsson, J., EMEP, EUSAAR, 2016, OC/EC at Vavíhill, data hosted by EBAS at NILU, Part of DOI: <https://doi.org/10.48597/R8J7-THQ8>

Martinsson, J., EMEP, EUSAAR, 2016, OC/EC at Vavíhill, data hosted by EBAS at NILU, Part of DOI: <https://doi.org/10.48597/S3HU-Q4M8>



Mathews, B., Degorska, A., EMEP, 2023, OC/EC at Diabla Gora, data hosted by EBAS at NILU, Part of DOI: <https://doi.org/10.48597/5V25-WYTD>

Mbengue, S., Holoubek, I., ACTRIS, EMEP, GAW-WDCA, 2019, OC/EC at Kosetice (NAOK), data hosted by EBAS at NILU, Part of DOI: <https://doi.org/10.48597/92X2-CVNM>

Mbengue, S., Holoubek, I., ACTRIS, EMEP, GAW-WDCA, 2019, OC/EC at Kosetice (NAOK), data hosted by EBAS at NILU, Part of DOI: <https://doi.org/10.48597/AW5Q-X9G3>, <https://doi.org/10.48597/H955-TEUB>

Mbengue, S., Holoubek, I., ACTRIS, EMEP, GAW-WDCA, 2020, OC/EC at Kosetice (NAOK), data hosted by EBAS at NILU, Part of DOI: <https://doi.org/10.48597/92X2-CVNM>

Mbengue, S., Holoubek, I., ACTRIS, EMEP, GAW-WDCA, 2021, OC/EC at Kosetice (NAOK), data hosted by EBAS at NILU, Part of DOI: <https://doi.org/10.48597/T3DY-V2FB>

Mbengue, S., Roman, P., ACTRIS, EMEP, GAW-WDCA, 2022, OC/EC at Kosetice (NAOK), data hosted by EBAS at NILU, Part of DOI: <https://doi.org/10.48597/T3DY-V2FB>

Mbengue, S., Roman, P., ACTRIS, EMEP, GAW-WDCA, 2023, OC/EC at Kosetice (NAOK), data hosted by EBAS at NILU, Part of DOI: <https://doi.org/10.48597/T3DY-V2FB>

McGhee, E., CAMPAIGN, EMEP, 2022, OC/EC at Auchencorth Moss, data hosted by EBAS at NILU, Part of DOI: <https://doi.org/10.48597/267N-USEU>

McGhee, E., CAMPAIGN, EMEP, 2022, OC/EC at Chilbolton Observatory, data hosted by EBAS at NILU, Part of DOI: <https://doi.org/10.48597/N47M-HAQP>

Melicherova, T., EMEP, 2004, Pm10\_mass at Liesek, data hosted by EBAS at NILU, Part of DOI: <https://doi.org/10.48597/ZJYN-4A7B>

Melicherova, T., EMEP, 2014, Pm10\_mass at Liesek, data hosted by EBAS at NILU, Part of DOI: <https://doi.org/10.48597/ZJYN-4A7B>

Mihalopoulos, N., Kouvarakis, G., EMEP, EUSAAR, GAW-WDCA, 2010, Pm10\_mass at Finokalia, data hosted by EBAS at NILU, Part of DOI: <https://doi.org/10.48597/JX65-9QB8>

Mihalopoulos, N., Kouvarakis, G., EMEP, EUSAAR, GAW-WDCA, 2024, Pm10\_mass at Finokalia, data hosted by EBAS at NILU, Part of DOI: <https://doi.org/10.48597/JX65-9QB8>

Mihalopoulos, N., Kouvarakis, G., Kalivitis, N., ACTRIS, EMEP, GAW-WDCA, 2015, Equivalent\_black\_carbon at Finokalia, data hosted by EBAS at NILU, Part of DOI: <https://doi.org/10.48597/AGY9-QWTB>

Mihalopoulos, N., Kouvarakis, G., Kalivitis, N., ACTRIS, EMEP, GAW-WDCA, 2017, Equivalent\_black\_carbon at Finokalia, data hosted by EBAS at NILU, Part of DOI: <https://doi.org/10.48597/3237-HVFZ>

Mihalopoulos, N., Kouvarakis, G., Kalivitis, N., GAW-WDCA, 2013, Pm10\_mass at Finokalia, data hosted by EBAS at NILU, Part of DOI: <https://doi.org/10.48597/Z66M-9GD7>

Mihalopoulos, N., Kouvarakis, G., Theodosi, C., ACTRIS, EMEP, GAW-WDCA, 2015, OC/EC at Finokalia, data hosted by EBAS at NILU, Part of DOI: <https://doi.org/10.48597/STDG-8XZP>

Mihalopoulos, N., Theodosi, C., Kouvarakis, G., ACTRIS, EMEP, GAW-WDCA, 2016, OC/EC at Finokalia, data hosted by EBAS at NILU, Part of DOI: <https://doi.org/10.48597/AHTY-W5R7>

Mihalopoulos, N., Tsagaraki, M., Kouvarakis, G., ACTRIS, CAMPAIGN, COLOSSAL, GAW-WDCA, 2019, OC/EC at Finokalia, data hosted by EBAS at NILU, Part of DOI: <https://doi.org/10.48597/AHTY-W5R7>

Minarikova, V., EMEP, 2019, Pm10\_mass at Stará Lesná, data hosted by EBAS at NILU, Part of DOI: <https://doi.org/10.48597/YEC4-NGBW>

Minarikova, V., EMEP, 2019, Pm10\_mass at Topolníky, data hosted by EBAS at NILU, Part of DOI: <https://doi.org/10.48597/ZQG3-VSYK>

Minarikova, V., EMEP, 2020, Pm10\_mass at Stará Lesná, data hosted by EBAS at NILU, Part of DOI: <https://doi.org/10.48597/RUG6-UX4K>

Minarikova, V., EMEP, 2020, Pm10\_mass at Topolníky, data hosted by EBAS at NILU, Part of DOI: <https://doi.org/10.48597/TT72-AVJK>

Minarikova, V., EMEP, 2021, Pm10\_mass at Stará Lesná, data hosted by EBAS at NILU, Part of DOI: <https://doi.org/10.48597/8P6H-DYVR>

Minarikova, V., EMEP, 2021, Pm10\_mass at Starina, data hosted by EBAS at NILU, Part of DOI: <https://doi.org/10.48597/9Q25-H98X>

Minarikova, V., EMEP, 2021, Pm10\_mass at Topolníky, data hosted by EBAS at NILU, Part of DOI: <https://doi.org/10.48597/JQW7-SS73>

Minarikova, V., EMEP, 2022, Pm10\_mass at Stará Lesná, data hosted by EBAS at NILU, Part of DOI: <https://doi.org/10.48597/8P6H-DYVR>

Minarikova, V., EMEP, 2022, Pm10\_mass at Starina, data hosted by EBAS at NILU, Part of DOI: <https://doi.org/10.48597/9Q25-H98X>

Minarikova, V., EMEP, 2022, Pm10\_mass at Topolniki, data hosted by EBAS at NILU, Part of DOI: <https://doi.org/10.48597/TMXB-U5XB>

Minarikova, V., EMEP, 2023, Pm10\_mass at Stará Lesná, data hosted by EBAS at NILU, Part of DOI: <https://doi.org/10.48597/8P6H-DYVR>

Minarikova, V., EMEP, 2023, Pm10\_mass at Starina, data hosted by EBAS at NILU, Part of DOI: <https://doi.org/10.48597/9Q25-H98X>

Minarikova, V., EMEP, 2023, Pm10\_mass at Topolniki, data hosted by EBAS at NILU, Part of DOI: <https://doi.org/10.48597/TMXB-U5XB>

Mitosinkova, M., CAMPAIGN, EMEP, 2004, OC/EC and pm10\_mass at Stará Lesná, data hosted by EBAS at NILU, Part of DOI: <https://doi.org/10.48597/A3V3-2D6H>

Mitosinkova, M., CAMPAIGN, EMEP, 2014, Pm10\_mass at Stará Lesná, data hosted by EBAS at NILU, Part of DOI: <https://doi.org/10.48597/ZHN9-2NCW>

Mitosinkova, M., EMEP, 2003, Pm10\_mass at Stará Lesná, data hosted by EBAS at NILU, Part of DOI: <https://doi.org/10.48597/STM8-PM2N>

Mitosinkova, M., EMEP, 2008, Pm10\_mass at Starina, data hosted by EBAS at NILU, Part of DOI: <https://doi.org/10.48597/E4AS-N3G9>

Mitosinkova, M., EMEP, 2012, Pm10\_mass at Topolniki, data hosted by EBAS at NILU, Part of DOI: <https://doi.org/10.48597/AJCE-9Y5F>

Mitosinkova, M., EMEP, 2014, Pm10\_mass at Stará Lesná, data hosted by EBAS at NILU, Part of DOI: <https://doi.org/10.48597/STM8-PM2N>

Mitosinkova, M., EMEP, 2014, Pm10\_mass at Starina, data hosted by EBAS at NILU, Part of DOI: <https://doi.org/10.48597/E4AS-N3G9>

Mitosinkova, M., EMEP, 2015, Pm10\_mass at Stará Lesná, data hosted by EBAS at NILU, Part of DOI: <https://doi.org/10.48597/H4F8-JPVZ>

Mitosinkova, M., EMEP, 2015, Pm10\_mass at Starina, data hosted by EBAS at NILU, Part of DOI: <https://doi.org/10.48597/SEEA-5DG3>

Mitosinkova, M., EMEP, 2015, Pm10\_mass at Topolniki, data hosted by EBAS at NILU, Part of DOI: <https://doi.org/10.48597/AJCE-9Y5F>

Mitosinkova, M., EMEP, 2016, Pm10\_mass at Stará Lesná, data hosted by EBAS at NILU, Part of DOI: <https://doi.org/10.48597/H4F8-JPVZ>

Mitosinkova, M., EMEP, 2016, Pm10\_mass at Stará Lesná, data hosted by EBAS at NILU, Part of DOI: <https://doi.org/10.48597/STM8-PM2N>

Mitosinkova, M., EMEP, 2016, Pm10\_mass at Starina, data hosted by EBAS at NILU, Part of DOI: <https://doi.org/10.48597/SEEA-5DG3>

Mitosinkova, M., EMEP, 2016, Pm10\_mass at Starina, data hosted by EBAS at NILU, Part of DOI: <https://doi.org/10.48597/E4AS-N3G9>

Mitosinkova, M., EMEP, 2016, Pm10\_mass at Topolniki, data hosted by EBAS at NILU, Part of DOI: <https://doi.org/10.48597/8SQR-EYJY>

Mitosinkova, M., EMEP, 2016, Pm10\_mass at Topolniki, data hosted by EBAS at NILU, Part of DOI: <https://doi.org/10.48597/AJCE-9Y5F>

Mitosinkova, M., EMEP, 2017, Pm10\_mass at Stará Lesná, data hosted by EBAS at NILU, Part of DOI: <https://doi.org/10.48597/K73F-ZCEP>

Mitosinkova, M., EMEP, 2017, Pm10\_mass at Starina, data hosted by EBAS at NILU, Part of DOI: <https://doi.org/10.48597/SY9N-3RB4>

Mitosinkova, M., EMEP, 2017, Pm10\_mass at Topolniki, data hosted by EBAS at NILU, Part of DOI: <https://doi.org/10.48597/UQR5-SF2V>

Mohamad, M., Toh, Y., GAW-WDCA, 2014, Pm10\_mass at Danum Valley, data hosted by EBAS at NILU, Part of DOI: <https://doi.org/10.48597/3WWM-K6RX>

Mohamad, M., Toh, Y., GAW-WDCA, 2019, Pm10\_mass at Danum Valley, data hosted by EBAS at NILU, Part of DOI: <https://doi.org/10.48597/PWCJ-5T2K>

Mohamad, M., Toh, Y., Shuhaimi, S., GAW-WDCA, 2012, Pm10\_mass at Petaling Jaya, data hosted by EBAS at NILU, Part of DOI: <https://doi.org/10.48597/5NW2-6HZD>

Muelen, T., CAMPAIGN, EMEP, 2004, OC/EC and pm10\_mass at Kollumerwaard, data hosted by EBAS at NILU, Part of DOI: <https://doi.org/10.48597/D9DW-5F8K>

Mueller, K., EMEP, 2014, Equivalent\_black\_carbon at Melpitz, data hosted by EBAS at NILU, Part of DOI: <https://doi.org/10.48597/9X5B-KR3N>

Mueller, K., GAW-WDCA, 2018, Inorganics in air and particle phase at Melpitz, data hosted by EBAS at NILU, Part of DOI: <https://doi.org/10.48597/VPEK-MKEF>, <https://doi.org/10.48597/KPWB-KDTN>

Navazo, M., CAMPAIGN, EMEP, 2022, PM mass at Bilbao, María Díaz de Haro, data hosted by EBAS at NILU, Part of DOI: <https://doi.org/10.48597/4H44-FVXN>

O'Dowd, C., Ceburnis, D., GAW-WDCA, 2023, PM mass at Mace Head, data hosted by EBAS at NILU, Part of DOI: <https://doi.org/10.48597/7XDZ-XKK9>, <https://doi.org/10.48597/5FAR-4R97>

O'Dowd, C., Ceburnis, D., GAW-WDCA, 2023, Pm10\_mass at Mace Head, data hosted by EBAS at NILU, Part of DOI: <https://doi.org/10.48597/7XDZ-XKK9>

O'Dowd, C., Ceburnis, D., GAW-WDCA, 2023, Pm25\_mass at Mace Head, data hosted by EBAS at NILU, Part of DOI: <https://doi.org/10.48597/5FAR-4R97>

Paul, W., EMEP, 2015, PM mass at Harwell, data hosted by EBAS at NILU, Part of DOI: <https://doi.org/10.48597/5XWE-N7CA>, <https://doi.org/10.48597/JPZD-EV8M>

Paul, W., EMEP, 2015, PM mass at Harwell, data hosted by EBAS at NILU, Part of DOI: <https://doi.org/10.48597/X8V4-MAZV>, <https://doi.org/10.48597/AEPN-RA3F>

Paul, W., EMEP, 2015, Pm10\_mass at Lough Navar, data hosted by EBAS at NILU, Part of DOI: <https://doi.org/10.48597/WP4M-9W9Q>

Paul, W., EMEP, 2015, Pm10\_mass at Narberth, data hosted by EBAS at NILU, Part of DOI: <https://doi.org/10.48597/G37K-SB98>

Paul, W., EMEP, 2016, PM mass at Harwell, data hosted by EBAS at NILU, Part of DOI: <https://doi.org/10.48597/5XWE-N7CA>, <https://doi.org/10.48597/JPZD-EV8M>

Paul, W., EMEP, 2016, PM mass at Harwell, data hosted by EBAS at NILU, Part of DOI: <https://doi.org/10.48597/X8V4-MAZV>, <https://doi.org/10.48597/AEPN-RA3F>

Paul, W., EMEP, 2016, Pm10\_mass at Lough Navar, data hosted by EBAS at NILU, Part of DOI: <https://doi.org/10.48597/WP4M-9W9Q>

Paul, W., EMEP, 2016, Pm10\_mass at Narberth, data hosted by EBAS at NILU, Part of DOI: <https://doi.org/10.48597/G37K-SB98>

Paul, W., EMEP, 2017, PM mass at Chilbolton Observatory, data hosted by EBAS at NILU, Part of DOI: <https://doi.org/10.48597/AUQF-4ZQA>, <https://doi.org/10.48597/K5FV-4YQC>

Paul, W., EMEP, 2017, PM mass at Chilbolton Observatory, data hosted by EBAS at NILU, Part of DOI: <https://doi.org/10.48597/DDF6-D6SR>, <https://doi.org/10.48597/9KAB-KWRW>

Paul, W., EMEP, 2017, Pm10\_mass at Lough Navar, data hosted by EBAS at NILU, Part of DOI: <https://doi.org/10.48597/WP4M-9W9Q>

Paul, W., EMEP, 2017, Pm10\_mass at Narberth, data hosted by EBAS at NILU, Part of DOI: <https://doi.org/10.48597/G37K-SB98>

Paul, W., EMEP, 2018, PM mass at Chilbolton Observatory, data hosted by EBAS at NILU, Part of DOI: <https://doi.org/10.48597/DDF6-D6SR>, <https://doi.org/10.48597/9KAB-KWRW>

Paul, W., EMEP, 2018, Pm10\_mass at Lough Navar, data hosted by EBAS at NILU, Part of DOI: <https://doi.org/10.48597/WP4M-9W9Q>

Paul, W., EMEP, 2018, Pm10\_mass at Narberth, data hosted by EBAS at NILU, Part of DOI: <https://doi.org/10.48597/G37K-SB98>

Paul, W., EMEP, 2019, PM mass at Chilbolton Observatory, data hosted by EBAS at NILU, Part of DOI: <https://doi.org/10.48597/DDF6-D6SR>, <https://doi.org/10.48597/9KAB-KWRW>

Paul, W., EMEP, 2019, Pm10\_mass at Lough Navar, data hosted by EBAS at NILU, Part of DOI: <https://doi.org/10.48597/WP4M-9W9Q>

Paul, W., EMEP, 2019, Pm10\_mass at Narberth, data hosted by EBAS at NILU, Part of DOI: <https://doi.org/10.48597/G37K-SB98>

Paul, W., EMEP, 2020, PM mass at Chilbolton Observatory, data hosted by EBAS at NILU, Part of DOI: <https://doi.org/10.48597/DDF6-D6SR>, <https://doi.org/10.48597/9KAB-KWRW>

Paul, W., EMEP, 2020, Pm10\_mass at Lough Navar, data hosted by EBAS at NILU, Part of DOI: <https://doi.org/10.48597/WP4M-9W9Q>

Paul, W., EMEP, 2020, Pm10\_mass at Narberth, data hosted by EBAS at NILU, Part of DOI: <https://doi.org/10.48597/G37K-SB98>

Paul, W., EMEP, 2021, PM mass at Chilbolton Observatory, data hosted by EBAS at NILU, Part of DOI: <https://doi.org/10.48597/DDF6-D6SR>, <https://doi.org/10.48597/9KAB-KWRW>

Paul, W., EMEP, 2021, Pm10\_mass at Lough Navar, data hosted by EBAS at NILU, Part of DOI: <https://doi.org/10.48597/WP4M-9W9Q>

Paul, W., EMEP, 2021, Pm10\_mass at Narberth, data hosted by EBAS at NILU, Part of DOI: <https://doi.org/10.48597/G37K-SB98>

Paul, W., EMEP, 2023, PM mass at Chilbolton Observatory, data hosted by EBAS at NILU, Part of DOI: <https://doi.org/10.48597/DDF6-D6SR>, <https://doi.org/10.48597/9KAB-KWRW>

Paul, W., EMEP, 2023, Pm10\_mass at Lough Navar, data hosted by EBAS at NILU, Part of DOI: <https://doi.org/10.48597/WP4M-9W9Q>

Paul, W., EMEP, 2023, Pm10\_mass at Narberth, data hosted by EBAS at NILU, Part of DOI: <https://doi.org/10.48597/F633-UBWH>

Paul, W., EMEP, 2023, Pm10\_mass at Narberth, data hosted by EBAS at NILU, Part of DOI: <https://doi.org/10.48597/G37K-SB98>

Pedroni, V., EMEP, 2015, Pm25\_mass at Ispra, data hosted by EBAS at NILU, Part of DOI: <https://doi.org/10.48597/X37R-JBYN>

Pedroni, V., EMEP, 2023, Pm25\_mass at Ispra, data hosted by EBAS at NILU, Part of DOI: <https://doi.org/10.48597/X37R-JBYN>

Pedroni, V., Martins Dos Santos, S., EMEP, 2023, Pm25\_mass at Ispra, data hosted by EBAS at NILU, Part of DOI: <https://doi.org/10.48597/TUVA-W8RZ>

Pedroni, V., Martins Dos Santos, S., EMEP, 2023, Pm25\_mass at Ispra, data hosted by EBAS at NILU, Part of DOI: <https://doi.org/10.48597/X37R-JBYN>

Pekarek, J., CAMPAIGN, EMEP, 2007, Organic\_carbon at Kosetice (NAOK), data hosted by EBAS at NILU, Part of DOI: <https://doi.org/10.48597/D3TV-SSH8>

Pekarek, J., EMEP, 2007, Pm25\_mass at Kosetice (NAOK), data hosted by EBAS at NILU, Part of DOI: <https://doi.org/10.48597/EXP9-BSEC>

Pekarek, J., EMEP, 2014, Pm25\_mass at Kosetice (NAOK), data hosted by EBAS at NILU, Part of DOI: <https://doi.org/10.48597/EXP9-BSEC>

Pekarek, J., EMEP, 2017, PM mass at Kosetice (NAOK), data hosted by EBAS at NILU, Part of DOI: <https://doi.org/10.48597/YN84-3QMU>, <https://doi.org/10.48597/EXP9-BSEC>

Pekarek, J., EMEP, 2017, Pm10\_mass at Kosetice (NAOK), data hosted by EBAS at NILU, Part of DOI: <https://doi.org/10.48597/YN84-3QMU>

Pekarek, J., EMEP, 2017, Pm10\_mass at Svratouch, data hosted by EBAS at NILU, Part of DOI: <https://doi.org/10.48597/Q9VX-CU9W>

Perez, N., Alastuey, A., ACTRIS, EMEP, 2015, Aluminium and inorganics in air and particle phase at Montseny, data hosted by EBAS at NILU, Part of DOI: <https://doi.org/10.48597/JYYP-PUJT>, <https://doi.org/10.48597/656K-HG78>, <https://doi.org/10.48597/9Q8V-W4TU>

Perez, N., Alastuey, A., ACTRIS, EMEP, 2015, Aluminium and inorganics in air and particle phase at Montseny, data hosted by EBAS at NILU, Part of DOI: <https://doi.org/10.48597/XHT4-C8NV>, <https://doi.org/10.48597/8C5C-S7M3>, <https://doi.org/10.48597/79DP-PBH6>

Perez, N., Alastuey, A., ACTRIS, EMEP, GAW-WDCA, 2021, Aluminium and inorganics in air and particle phase at Montseny, data hosted by EBAS at NILU, Part of DOI: <https://doi.org/10.48597/T5QK-MV5M>, <https://doi.org/10.48597/4KEY-TWBM>

Perez, N., Alastuey, A., ACTRIS, EMEP, GAW-WDCA, 2021, Aluminium and inorganics in air and particle phase at Montseny, data hosted by EBAS at NILU, Part of DOI: <https://doi.org/10.48597/T5QK-MV5M>, <https://doi.org/10.48597/4KEY-TWBM>, <https://doi.org/10.48597/2FR5-2EYD>

Perez, N., Alastuey, A., ACTRIS, EMEP, GAW-WDCA, 2021, Aluminium and inorganics in air and particle phase at Montseny, data hosted by EBAS at NILU, Part of DOI: <https://doi.org/10.48597/XKAP-FB34>, <https://doi.org/10.48597/GHW4-977V>

Perez, N., Alastuey, A., ACTRIS, EMEP, GAW-WDCA, 2021, Aluminium and inorganics in air and particle phase at Montseny, data hosted by EBAS at NILU, Part of DOI: <https://doi.org/10.48597/XKAP-FB34>, <https://doi.org/10.48597/GHW4-977V>, <https://doi.org/10.48597/UURG-6Q9Q>

Perez, N., Alastuey, A., ACTRIS, EMEP, GAW-WDCA, 2022, Aluminium and inorganics in air and particle phase at Montseny, data hosted by EBAS at NILU, Part of DOI: <https://doi.org/10.48597/UWR3-UDDG>

Perez, N., Alastuey, A., ACTRIS, EMEP, GAW-WDCA, 2022, Aluminium and inorganics in air and particle phase at Montseny, data hosted by EBAS at NILU, Part of DOI: <https://doi.org/10.48597/YHGD-YGMT>

Perez, N., Alastuey, A., ACTRIS, EMEP, GAW-WDCA, 2023, Aluminium and inorganics in air and particle phase at Montseny, data hosted by EBAS at NILU, Part of DOI: <https://doi.org/10.48597/UWR3-UDDG>, <https://doi.org/10.48597/2FR5-2EYD>

Perez, N., Alastuey, A., ACTRIS, EMEP, GAW-WDCA, 2023, Aluminium and inorganics in air and particle phase at Montseny, data hosted by EBAS at NILU, Part of DOI: <https://doi.org/10.48597/YHGD-YGMT>, <https://doi.org/10.48597/UURG-6Q9Q>

Perez, N., Alastuey, A., EMEP, 2014, Pm10\_mass at Montseny, data hosted by EBAS at NILU, Part of DOI: <https://doi.org/10.48597/UBW2-UHTM>

Perez, N., Alastuey, A., EMEP, 2014, Pm25\_mass at Montseny, data hosted by EBAS at NILU, Part of DOI: <https://doi.org/10.48597/KASD-BMQV>

Perez, N., Alastuey, A., EMEP, 2021, Pm10\_mass at Montseny, data hosted by EBAS at NILU, Part of DOI: <https://doi.org/10.48597/B8H7-SJMR>

Perez, N., Alastuey, A., EMEP, 2021, Pm25\_mass at Montseny, data hosted by EBAS at NILU, Part of DOI: <https://doi.org/10.48597/R8BV-EVJJ>

Perez, N., EMEP, 2012, Aluminium at Montseny, data hosted by EBAS at NILU, Part of DOI: <https://doi.org/10.48597/4GX6-ZV9F>

Perez, N., EMEP, 2012, Aluminium at Montseny, data hosted by EBAS at NILU, Part of DOI: <https://doi.org/10.48597/RRQP-MCJJ>

Perez, N., EMEP, 2012, Inorganics in air and particle phase at Montseny, data hosted by EBAS at NILU, Part of DOI: <https://doi.org/10.48597/3XUW-KFBA>

Perez, N., EMEP, 2012, Inorganics in air and particle phase at Montseny, data hosted by EBAS at NILU, Part of DOI: <https://doi.org/10.48597/6YQB-2MEN>

Perez, N., EMEP, 2013, Aluminium and inorganics in air and particle phase at Montseny, data hosted by EBAS at NILU, Part of DOI: <https://doi.org/10.48597/2TTG-DXVD>

Perez, N., EMEP, 2013, Aluminium and inorganics in air and particle phase at Montseny, data hosted by EBAS at NILU, Part of DOI: <https://doi.org/10.48597/Y99M-J8K9>

Perez, N., EMEP, 2014, Inorganics in air and particle phase at Montseny, data hosted by EBAS at NILU, Part of DOI: <https://doi.org/10.48597/TQBT-3WGJ>, <https://doi.org/10.48597/R9D7-DVNR>

Perez, N., EMEP, 2014, Inorganics in air and particle phase at Montseny, data hosted by EBAS at NILU, Part of DOI: <https://doi.org/10.48597/VAWC-SARQ>, <https://doi.org/10.48597/YN6E-4B55>

Perrino, C., CAMPAIGN, EMEP, 2007, Aluminium and inorganics in air and particle phase at Montelibretti, data hosted by EBAS at NILU, Part of DOI: <https://doi.org/10.48597/H223-WFQE>, <https://doi.org/10.48597/BDPN-DZX2>

Perrino, C., CAMPAIGN, EMEP, 2007, Aluminium at Montelibretti, data hosted by EBAS at NILU, Part of DOI: <https://doi.org/10.48597/E5TP-PNQQ>

Perrino, C., CAMPAIGN, EMEP, 2007, Ammonium at Montelibretti, data hosted by EBAS at NILU, Part of DOI: <https://doi.org/10.48597/ASHJ-BSWX>

Perrino, C., CAMPAIGN, EMEP, 2007, Inorganics in air and particle phase at Montelibretti, data hosted by EBAS at NILU, Part of DOI: <https://doi.org/10.48597/6BDY-Q342>, <https://doi.org/10.48597/E9UW-HQ77>

Perrino, C., CAMPAIGN, EMEP, 2007, Inorganics in air and particle phase at Montelibretti, data hosted by EBAS at NILU, Part of DOI: <https://doi.org/10.48597/W67T-KUF6>

Perrino, C., CAMPAIGN, EMEP, 2007, OC/EC and inorganics in air and particle phase at Montelibretti, data hosted by EBAS at NILU, Part of DOI: <https://doi.org/10.48597/894S-ZEFR>

Perrino, C., CAMPAIGN, EMEP, 2007, OC/EC, aluminium and sodium at Montelibretti, data hosted by EBAS at NILU, Part of DOI: <https://doi.org/10.48597/GYJH-629M>, <https://doi.org/10.48597/GHXR-55GT>

Perrino, C., CAMPAIGN, EMEP, 2007, Sodium at Ispra, data hosted by EBAS at NILU, Part of DOI: <https://doi.org/10.48597/WF9F-G6VB>

Perrino, C., CAMPAIGN, EMEP, 2009, OC/EC at Montelibretti, data hosted by EBAS at NILU, Part of DOI: <https://doi.org/10.48597/PNAD-M9HK>

Perrino, C., CAMPAIGN, EMEP, 2014, Sodium at Ispra, data hosted by EBAS at NILU, Part of DOI: <https://doi.org/10.48597/WF9F-G6VB>

Perrino, C., EMEP, 2003, Pm10\_mass at Montelibretti, data hosted by EBAS at NILU, Part of DOI: <https://doi.org/10.48597/3FWF-GQVS>

Perrino, C., EMEP, 2003, Sulphate\_total at Montelibretti, data hosted by EBAS at NILU, Part of DOI: <https://doi.org/10.48597/DQ2B-FCH6>

Perrino, C., EMEP, 2006, Pm10\_mass at Montelibretti, data hosted by EBAS at NILU, Part of DOI: <https://doi.org/10.48597/THQB-2GNS>

Perrino, C., EMEP, 2007, Inorganics in air and particle phase at Montelibretti, data hosted by EBAS at NILU, Part of DOI: <https://doi.org/10.48597/44SM-2Z3Q>

Perrino, C., EMEP, 2007, Inorganics in air and particle phase at Montelibretti, data hosted by EBAS at NILU, Part of DOI: <https://doi.org/10.48597/JSAW-KPJN>

Perrino, C., EMEP, 2007, Inorganics in air and particle phase at Montelibretti, data hosted by EBAS at NILU, Part of DOI: <https://doi.org/10.48597/STK9-AW9E>

Perrino, C., EMEP, 2007, Nitrate at Montelibretti, data hosted by EBAS at NILU, Part of DOI: <https://doi.org/10.48597/BKZK-3BQ6>

Perrino, C., EMEP, 2007, Pm10\_mass at Montelibretti, data hosted by EBAS at NILU, Part of DOI: <https://doi.org/10.48597/R35B-YSQN>

Perrino, C., EMEP, 2008, Inorganics in air and particle phase at Montelibretti, data hosted by EBAS at NILU, Part of DOI: <https://doi.org/10.48597/YUVF-GYZQ>

Perrino, C., EMEP, 2008, Pm10\_mass at Montelibretti, data hosted by EBAS at NILU, Part of DOI: <https://doi.org/10.48597/F5ZR-3W5K>

Perrino, C., EMEP, 2008, Pm25\_mass at Montelibretti, data hosted by EBAS at NILU, Part of DOI: <https://doi.org/10.48597/KZVG-NC7E>

Perrino, C., EMEP, 2012, Pm10\_mass at Montelibretti, data hosted by EBAS at NILU, Part of DOI: <https://doi.org/10.48597/F5ZR-3W5K>

Perrino, C., EMEP, 2013, Pm10\_mass at Montelibretti, data hosted by EBAS at NILU, Part of DOI: <https://doi.org/10.48597/F5ZR-3W5K>

Perrino, C., EMEP, 2014, Inorganics in air and particle phase at Montelibretti, data hosted by EBAS at NILU, Part of DOI: <https://doi.org/10.48597/HEXA-54E2>

Perrino, C., EMEP, 2014, Inorganics in air and particle phase at Montelibretti, data hosted by EBAS at NILU, Part of DOI: <https://doi.org/10.48597/HQDM-CJ5M>

Perrino, C., EMEP, 2014, Pm10\_mass at Montelibretti, data hosted by EBAS at NILU, Part of DOI: <https://doi.org/10.48597/3FWF-GQVS>

Perrino, C., EMEP, 2014, Pm10\_mass at Montelibretti, data hosted by EBAS at NILU, Part of DOI: <https://doi.org/10.48597/F5ZR-3W5K>

Perrino, C., EMEP, 2014, Pm25\_mass at Montelibretti, data hosted by EBAS at NILU, Part of DOI: <https://doi.org/10.48597/KZVG-NC7E>

Perrino, C., EMEP, 2014, Sulphate\_total at Montelibretti, data hosted by EBAS at NILU, Part of DOI: <https://doi.org/10.48597/C6A8-FGHU>

Perrino, C., EMEP, 2015, Inorganics in air and particle phase at Montelibretti, data hosted by EBAS at NILU, Part of DOI: <https://doi.org/10.48597/8E8J-GBM2>

Perrino, C., EMEP, 2015, Pm10\_mass at Montelibretti, data hosted by EBAS at NILU, Part of DOI: <https://doi.org/10.48597/F5ZR-3W5K>

Perrino, C., EMEP, 2017, Inorganics in air and particle phase at Montelibretti, data hosted by EBAS at NILU, Part of DOI: <https://doi.org/10.48597/8E8J-GBM2>

Perrino, C., EMEP, 2017, Pm10\_mass at Montelibretti, data hosted by EBAS at NILU, Part of DOI: <https://doi.org/10.48597/F5ZR-3W5K>

Petit, J., Truong, F., Bonnaire, N., ACTRIS, EMEP, GAW-WDCA, 2021, OC/EC at SIRTa Atmospheric Research Observatory, data hosted by EBAS at NILU, Part of DOI: <https://doi.org/10.48597/CFQC-TZXU>

Petit, J., Truong, F., Bonnaire, N., ACTRIS, EMEP, GAW-WDCA, 2021, OC/EC at SIRTa Atmospheric Research Observatory, data hosted by EBAS at NILU, Part of DOI: <https://doi.org/10.48597/FC4B-MHNZ>

Petit, J., Truong, F., Bonnaire, N., ACTRIS, EMEP, GAW-WDCA, 2021, OC/EC at SIRTa Atmospheric Research Observatory, data hosted by EBAS at NILU, Part of DOI: <https://doi.org/10.48597/TYJ5-W35G>

Pittavino, S., Diemoz, H., CAMPAIGN, COLOSSAL, GAW-WDCA, 2018, OC/EC at Aosta-Saint Christophe, data hosted by EBAS at NILU, Part of DOI: <https://doi.org/10.48597/7KND-4CCV>

Poulain, L., Fuchs, S., ACTRIS, EMEP, 2021, Inorganics in air and particle phase at Melpitz, data hosted by EBAS at NILU, Part of DOI: <https://doi.org/10.48597/4UJ2-NH8A>, <https://doi.org/10.48597/R64M-B8MD>

Poulain, L., Fuchs, S., ACTRIS, EMEP, 2021, Sulphate\_corrected at Melpitz, data hosted by EBAS at NILU, Part of DOI: <https://doi.org/10.48597/ZSMW-GWHY>, <https://doi.org/10.48597/STW8-4RVK>

Poulain, L., Fuchs, S., ACTRIS, EMEP, 2022, Sulphate\_corrected at Melpitz, data hosted by EBAS at NILU, Part of DOI: <https://doi.org/10.48597/ZSMW-GWHY>, <https://doi.org/10.48597/STW8-4RVK>

Poulain, L., Roedger, A., ACTRIS, EMEP, 2021, OC/EC at Melpitz, data hosted by EBAS at NILU, Part of DOI: <https://doi.org/10.48597/UEB8-XKV9>

Poulain, L., Roedger, A., ACTRIS, EMEP, 2023, OC/EC and pm25\_mass at Melpitz, data hosted by EBAS at NILU, Part of DOI: <https://doi.org/10.48597/S64J-Q3J3>, <https://doi.org/10.48597/RJU6-3SH8>, <https://doi.org/10.48597/UEB8-XKV9>

Poulain, L., Roedger, A., ACTRIS, EMEP, 2023, OC/EC at Melpitz, data hosted by EBAS at NILU, Part of DOI: <https://doi.org/10.48597/RJU6-3SH8>

Poulain, L., Roedger, A., EMEP, 2021, PM mass at Melpitz, data hosted by EBAS at NILU, Part of DOI: <https://doi.org/10.48597/JA9D-4YHY>, <https://doi.org/10.48597/BTX4-3K3F>

Poulain, L., Roedger, A., EMEP, 2023, Pm10\_mass at Melpitz, data hosted by EBAS at NILU, Part of DOI: <https://doi.org/10.48597/JA9D-4YHY>

Presicci, A., EMEP, EUSAAR, GAW-WDCA, 2008, Nitrate at Harwell, data hosted by EBAS at NILU, Part of DOI: <https://doi.org/10.48597/APDS-UJX3>

Presicci, A., EMEP, EUSAAR, GAW-WDCA, 2008, OC/EC at Harwell, data hosted by EBAS at NILU, Part of DOI: <https://doi.org/10.48597/B22N-H6YY>

Puric, G., EMEP, 2023, Pm10\_mass at Puntijarka, data hosted by EBAS at NILU, Part of DOI: <https://doi.org/10.48597/Z42P-356K>

Puric, G., EMEP, 2023, Pm25\_mass at Puntijarka, data hosted by EBAS at NILU, Part of DOI: <https://doi.org/10.48597/CDUZ-Q3EA>

Puskas, M., Gyarmatine Meszaros, E., EMEP, 2022, PM mass at Nyirjes, data hosted by EBAS at NILU, Part of DOI: <https://doi.org/10.48597/77XG-AFR6>, <https://doi.org/10.48597/9VRD-3GZW>

Puskas, M., Gyarmatine Meszaros, E., EMEP, 2023, PM mass at Nyirjes, data hosted by EBAS at NILU, Part of DOI: <https://doi.org/10.48597/77XG-AFR6>, <https://doi.org/10.48597/9VRD-3GZW>

Putaud, J., CAMPAIGN, EMEP, 2004, OC/EC and pm10\_mass at Ispra, data hosted by EBAS at NILU, Part of DOI: <https://doi.org/10.48597/N5BR-C3PE>

Putaud, J., CAMPAIGN, EMEP, 2009, OC/EC at Ispra, data hosted by EBAS at NILU, Part of DOI: <https://doi.org/10.48597/K3BK-YK27>

Putaud, J., EMEP, 2003, PM mass at Ispra, data hosted by EBAS at NILU, Part of DOI: <https://doi.org/10.48597/8VEK-XDTH>

Putaud, J., EMEP, 2005, Elemental\_carbon at Ispra, data hosted by EBAS at NILU, Part of DOI: <https://doi.org/10.48597/F2VH-Q56U>

Putaud, J., EMEP, 2005, Organic\_carbon at Ispra, data hosted by EBAS at NILU, Part of DOI: <https://doi.org/10.48597/GR72-8SKR>

Putaud, J., EMEP, 2007, Inorganics in air and particle phase at Ispra, data hosted by EBAS at NILU, Part of DOI: <https://doi.org/10.48597/JA26-324T>, <https://doi.org/10.48597/BBED-UXQU>

Putaud, J., EMEP, 2009, Ammonium at Ispra, data hosted by EBAS at NILU, Part of DOI: <https://doi.org/10.48597/3YJR-RZPS>

Putaud, J., EMEP, 2009, Ammonium at Ispra, data hosted by EBAS at NILU, Part of DOI: <https://doi.org/10.48597/99UY-S3XA>

Putaud, J., EMEP, 2009, Nitrate at Ispra, data hosted by EBAS at NILU, Part of DOI: <https://doi.org/10.48597/YU8D-CCB8>

Putaud, J., EMEP, 2013, Elemental\_carbon at Ispra, data hosted by EBAS at NILU, Part of DOI: <https://doi.org/10.48597/4BUG-EY9J>

Putaud, J., EMEP, 2013, OC/EC at Ispra, data hosted by EBAS at NILU, Part of DOI: <https://doi.org/10.48597/4BUG-EY9J>, <https://doi.org/10.48597/WC4R-7YMM>

Putaud, J., EMEP, 2014, Elemental\_carbon and inorganics in air and particle phase at Ispra, data hosted by EBAS at NILU, Part of DOI: <https://doi.org/10.48597/NHTW-ZYCK>, <https://doi.org/10.48597/BBED-UXQU>

Putaud, J., EMEP, 2014, Elemental\_carbon and inorganics in air and particle phase at Ispra, data hosted by EBAS at NILU, Part of DOI: <https://doi.org/10.48597/QTPE-Y9AQ>, <https://doi.org/10.48597/BBED-UXQU>, <https://doi.org/10.48597/2Z4K-VFC3>

Putaud, J., EMEP, 2014, Inorganics in air and particle phase at Ispra, data hosted by EBAS at NILU, Part of DOI: <https://doi.org/10.48597/BBED-UXQU>

Putaud, J., EMEP, 2014, Inorganics in air and particle phase at Ispra, data hosted by EBAS at NILU, Part of DOI: <https://doi.org/10.48597/WX9T-HNUA>, <https://doi.org/10.48597/BBED-UXQU>, <https://doi.org/10.48597/2Z4K-VFC3>

Putaud, J., EMEP, 2014, Nitrate at Ispra, data hosted by EBAS at NILU, Part of DOI: <https://doi.org/10.48597/YU8D-CCB8>

Putaud, J., EMEP, 2014, Pm25\_mass at Ispra, data hosted by EBAS at NILU, Part of DOI: <https://doi.org/10.48597/49A3-ZDQU>

Putaud, J., EMEP, EUSAAR, GAW-WDCA, 2009, OC/EC at Ispra, data hosted by EBAS at NILU, Part of DOI: <https://doi.org/10.48597/SAN6-WCBP>

Putaud, J., EMEP, EUSAAR, GAW-WDCA, 2014, OC/EC at Ispra, data hosted by EBAS at NILU, Part of DOI: <https://doi.org/10.48597/SAN6-WCBP>

Querol, X., Alastuey, A., ACTRIS, EMEP, GAW-WDCA, 2014, OC/EC at Montseny, data hosted by EBAS at NILU, Part of DOI: <https://doi.org/10.48597/J356-MMR6>

Querol, X., Alastuey, A., ACTRIS, EMEP, GAW-WDCA, 2014, OC/EC at Montseny, data hosted by EBAS at NILU, Part of DOI: <https://doi.org/10.48597/Q6P6-43W6>

Querol, X., Alastuey, A., ACTRIS, EMEP, GAW-WDCA, 2015, OC/EC at Montseny, data hosted by EBAS at NILU, Part of DOI: <https://doi.org/10.48597/2X7A-HWD5>

Querol, X., Alastuey, A., ACTRIS, EMEP, GAW-WDCA, 2015, OC/EC at Montseny, data hosted by EBAS at NILU, Part of DOI: <https://doi.org/10.48597/ZMZZ-H2CE>

Querol, X., Alastuey, A., EMEP, EUSAAR, GAW-WDCA, 2013, OC/EC at Montseny, data hosted by EBAS at NILU, Part of DOI: <https://doi.org/10.48597/348U-SDNA>

Querol, X., Alastuey, A., EMEP, EUSAAR, GAW-WDCA, 2013, OC/EC at Montseny, data hosted by EBAS at NILU, Part of DOI: <https://doi.org/10.48597/ARCK-RFU6>

Querol, X., Alastuey, A., EMEP, EUSAAR, GAW-WDCA, 2013, OC/EC at Montseny, data hosted by EBAS at NILU, Part of DOI: <https://doi.org/10.48597/ZE95-UXAF>

Querol, X., CAMPAIGN, EMEP, 2007, Pm25\_mass at Montseny, data hosted by EBAS at NILU, Part of DOI: <https://doi.org/10.48597/ED6Q-HSPZ>

Querol, X., CAMPAIGN, EMEP, 2007, Pm25\_mass at Montseny, data hosted by EBAS at NILU, Part of DOI: <https://doi.org/10.48597/XK2C-X4DZ>

Querol, X., Cusack, M., EMEP, EUSAAR, GAW-WDCA, 2010, Aluminium and inorganics in air and particle phase at Montseny, data hosted by EBAS at NILU, Part of DOI: <https://doi.org/10.48597/HGDD-KZPD>

Querol, X., Cusack, M., EMEP, EUSAAR, GAW-WDCA, 2010, Inorganics in air and particle phase at Montseny, data hosted by EBAS at NILU, Part of DOI: <https://doi.org/10.48597/7DD7-HK28>

Querol, X., Perez, N., EMEP, EUSAAR, GAW-WDCA, 2010, Aluminium and inorganics in air and particle phase at Montseny, data hosted by EBAS at NILU, Part of DOI: <https://doi.org/10.48597/5SUH-APJB>

Querol, X., Perez, N., EMEP, EUSAAR, GAW-WDCA, 2010, Aluminium at Montseny, data hosted by EBAS at NILU, Part of DOI: <https://doi.org/10.48597/6Z5D-9ACJ>

Rajot, J. L., Abdourhamane Touré, A., Marticorena, B., Bouet, C., Chatenet, B., Féron, A., Gaimoz, C., Maisonneuve, F., Siour, G., Valorso, R., Maman, A., and Zakou, A.: PM10 concentration, Banizoumbou, Niger., AERIS., 2010a. <https://doi.org/10.25326/211>

Rajot, J. L., Boubacar, A., Marticorena, B., Bouet, C., Chatenet, B., Féron, A., Gaimoz, C., Maisonneuve, F., Siour, G., Valorso, R., Coulibaly, S. B., Kouyaté, Z., Coulibaly, B., Coulibaly, M., Koné, I., and Traoré, S.: PM10 concentration, Cinzana, Mali., AERIS, 2010b. <https://doi.org/10.25326/268>.

Reis, V., CAMP, 2015, OC/EC at Monte Velho, data hosted by EBAS at NILU, Part of DOI: <https://doi.org/10.48597/BY89-A2MU>

Reis, V., CAMP, 2015, Sodium at Alfragide, data hosted by EBAS at NILU, Part of DOI: <https://doi.org/10.48597/4UGS-H9ER>

Reis, V., CAMP, 2015, Sodium at Monte Velho, data hosted by EBAS at NILU, Part of DOI: <https://doi.org/10.48597/KKMM-F2PM>

Reis, V., CAMP, 2016, Inorganics in air and particle phase at Monte Velho, data hosted by EBAS at NILU, Part of DOI: <https://doi.org/10.48597/M3YS-NX8D>

Reis, V., CAMP, 2016, OC/EC and inorganics in air and particle phase at Monte Velho, data hosted by EBAS at NILU, Part of DOI: <https://doi.org/10.48597/NE9R-T296>, <https://doi.org/10.48597/ADV4-4F8W>, <https://doi.org/10.48597/75QE-CF95>

Reis, V., CAMP, 2016, OC/EC at Alfragide, data hosted by EBAS at NILU, Part of DOI: <https://doi.org/10.48597/NUJX-B8SW>

Reis, V., CAMP, 2016, OC/EC at Alfragide, data hosted by EBAS at NILU, Part of DOI: <https://doi.org/10.48597/WVNU-TCJQ>

Reis, V., CAMP, 2016, Sodium at Monte Velho, data hosted by EBAS at NILU, Part of DOI: <https://doi.org/10.48597/ZGGD-V99M>

Reis, V., CAMP, 2017, Inorganics in air and particle phase at Alfragide, data hosted by EBAS at NILU, Part of DOI: <https://doi.org/10.48597/97JE-24BW>, <https://doi.org/10.48597/WE58-TR6S>

Reis, V., CAMP, 2017, Inorganics in air and particle phase at Alfragide, data hosted by EBAS at NILU, Part of DOI: <https://doi.org/10.48597/U9CG-2HAW>, <https://doi.org/10.48597/DQYF-T9EF>, <https://doi.org/10.48597/GC43-WQCU>



Reis, V., CAMP, 2017, Inorganics in air and particle phase at Monte Velho, data hosted by EBAS at NILU, Part of DOI: <https://doi.org/10.48597/N8Y7-GW7V>, <https://doi.org/10.48597/8ZFE-9XSD>, <https://doi.org/10.48597/HFG5-72VH>, <https://doi.org/10.48597/H25T-2RPQ>

Reis, V., CAMP, 2017, Sodium at Alfragide, data hosted by EBAS at NILU, Part of DOI: <https://doi.org/10.48597/62FU-MBS7>

Reis, V., CAMP, 2017, Sodium at Monte Velho, data hosted by EBAS at NILU, Part of DOI: <https://doi.org/10.48597/HMYC-3XKF>

Ren, P., CAMPAIGN, EMEP, 2008, Inorganics in air and particle phase at Cabauw Zijdweg, data hosted by EBAS at NILU, Part of DOI: <https://doi.org/10.48597/XNZH-33R2>

Ren, P., CAMPAIGN, EMEP, 2015, Inorganics in air and particle phase at Cabauw Zijdweg, data hosted by EBAS at NILU, Part of DOI: <https://doi.org/10.48597/4VKV-MWD8>, <https://doi.org/10.48597/NY4P-HSTX>, <https://doi.org/10.48597/XHXX-N3S7>, <https://doi.org/10.48597/M6QD-EQKQ>

Ren, P., CAMPAIGN, EMEP, 2015, Inorganics in air and particle phase at Cabauw Zijdweg, data hosted by EBAS at NILU, Part of DOI: <https://doi.org/10.48597/NY4P-HSTX>, <https://doi.org/10.48597/XHXX-N3S7>, <https://doi.org/10.48597/M6QD-EQKQ>

Ren, P., EMEP, 2015, Sulphate\_total at Cabauw Zijdweg, data hosted by EBAS at NILU, Part of DOI: <https://doi.org/10.48597/76WX-98RP>

Rinaldi, R., Mahdi, R., GAW-WDCA, 2022, Pm10\_mass at Bukit Kototabang, data hosted by EBAS at NILU, Part of DOI: <https://doi.org/10.48597/7GKZ-H46T>

Rüdiger, J., CAMP, EMEP, 2021, Inorganics in air and particle phase at Westerland, data hosted by EBAS at NILU, Part of DOI: <https://doi.org/10.48597/6EJ8-UNDE>, <https://doi.org/10.48597/XGE9-EQB3>

Rüdiger, J., CAMP, EMEP, 2022, Inorganics in air and particle phase at Westerland, data hosted by EBAS at NILU, Part of DOI: <https://doi.org/10.48597/6EJ8-UNDE>, <https://doi.org/10.48597/XGE9-EQB3>

Rüdiger, J., CAMP, EMEP, 2023, Inorganics in air and particle phase at Westerland, data hosted by EBAS at NILU, Part of DOI: <https://doi.org/10.48597/6EJ8-UNDE>

Rüdiger, J., EMEP, 2021, Inorganics in air and particle phase at Neuglobsow, data hosted by EBAS at NILU, Part of DOI: <https://doi.org/10.48597/ZHQV-Q4AS>, <https://doi.org/10.48597/A3V5-A8AM>

Rüdiger, J., EMEP, 2021, Inorganics in air and particle phase at Schauinsland, data hosted by EBAS at NILU, Part of DOI: <https://doi.org/10.48597/Z36F-ME7D>, <https://doi.org/10.48597/NV43-TJN9>

Rüdiger, J., EMEP, 2021, Inorganics in air and particle phase at Schmücke, data hosted by EBAS at NILU, Part of DOI: <https://doi.org/10.48597/RHY7-GYQJ>, <https://doi.org/10.48597/ZT56-U779>

Rüdiger, J., EMEP, 2021, Inorganics in air and particle phase at Waldhof, data hosted by EBAS at NILU, Part of DOI: <https://doi.org/10.48597/JVWM-7KDU>, <https://doi.org/10.48597/WWD6-4G4R>

Rüdiger, J., EMEP, 2021, OC/EC at Neuglobsow, data hosted by EBAS at NILU, Part of DOI: <https://doi.org/10.48597/NTBE-CRJD>

Rüdiger, J., EMEP, 2021, OC/EC at Schauinsland, data hosted by EBAS at NILU, Part of DOI: <https://doi.org/10.48597/2WRM-UA7U>

Rüdiger, J., EMEP, 2021, OC/EC at Schmücke, data hosted by EBAS at NILU, Part of DOI: <https://doi.org/10.48597/EH4J-UEQ5>

Rüdiger, J., EMEP, 2021, OC/EC at Waldhof, data hosted by EBAS at NILU, Part of DOI: <https://doi.org/10.48597/MNGD-A9YU>

Rüdiger, J., EMEP, 2021, OC/EC at Zingst, data hosted by EBAS at NILU, Part of DOI: <https://doi.org/10.48597/PQXT-NCS9>

Rüdiger, J., EMEP, 2022, OC/EC at Neuglobsow, data hosted by EBAS at NILU, Part of DOI: <https://doi.org/10.48597/NTBE-CRJD>

Rüdiger, J., EMEP, 2022, OC/EC at Schauinsland, data hosted by EBAS at NILU, Part of DOI: <https://doi.org/10.48597/2WRM-UA7U>

Rüdiger, J., EMEP, 2022, OC/EC at Schmücke, data hosted by EBAS at NILU, Part of DOI: <https://doi.org/10.48597/EH4J-UEQ5>

Rüdiger, J., EMEP, 2022, OC/EC at Waldhof, data hosted by EBAS at NILU, Part of DOI: <https://doi.org/10.48597/MNGD-A9YU>

Rüdiger, J., EMEP, 2022, OC/EC at Zingst, data hosted by EBAS at NILU, Part of DOI: <https://doi.org/10.48597/PQXT-NCS9>

Rüdiger, J., EMEP, 2023, Inorganics in air and particle phase at Neuglobsow, data hosted by EBAS at NILU, Part of DOI: <https://doi.org/10.48597/ZHQV-Q4AS>

Rüdiger, J., EMEP, 2023, Inorganics in air and particle phase at Neuglobsow, data hosted by EBAS at NILU, Part of DOI: <https://doi.org/10.48597/ZHQV-Q4AS>, <https://doi.org/10.48597/A3V5-A8AM>

Rüdiger, J., EMEP, 2023, Inorganics in air and particle phase at Schauinsland, data hosted by EBAS at NILU, Part of DOI: <https://doi.org/10.48597/Z36F-ME7D>

Rüdiger, J., EMEP, 2023, Inorganics in air and particle phase at Schauinsland, data hosted by EBAS at NILU, Part of DOI: <https://doi.org/10.48597/Z36F-ME7D>, <https://doi.org/10.48597/NV43-TJN9>

Rüdiger, J., EMEP, 2023, Inorganics in air and particle phase at Schmücke, data hosted by EBAS at NILU, Part of DOI: <https://doi.org/10.48597/RHY7-GYQJ>

Rüdiger, J., EMEP, 2023, Inorganics in air and particle phase at Waldhof, data hosted by EBAS at NILU, Part of DOI: <https://doi.org/10.48597/JVWM-7KDU>

Rüdiger, J., EMEP, 2023, Inorganics in air and particle phase at Waldhof, data hosted by EBAS at NILU, Part of DOI: <https://doi.org/10.48597/JVWM-7KDU>, <https://doi.org/10.48597/WWD6-4G4R>

Rüdiger, J., EMEP, 2023, OC/EC at Neuglobsow, data hosted by EBAS at NILU, Part of DOI: <https://doi.org/10.48597/NTBE-CRJD>

Rüdiger, J., EMEP, 2023, OC/EC at Schauinsland, data hosted by EBAS at NILU, Part of DOI: <https://doi.org/10.48597/2WRM-UA7U>

Rüdiger, J., EMEP, 2023, OC/EC at Schmücke, data hosted by EBAS at NILU, Part of DOI: <https://doi.org/10.48597/EH4J-UEQ5>

Rüdiger, J., EMEP, 2023, OC/EC at Waldhof, data hosted by EBAS at NILU, Part of DOI: <https://doi.org/10.48597/MNGD-A9YU>

Rüdiger, J., EMEP, 2023, OC/EC at Zingst, data hosted by EBAS at NILU, Part of DOI: <https://doi.org/10.48597/PQXT-NCS9>

Rüdiger, J., EMEP, 2023, Pm10\_mass at Neuglobsow, data hosted by EBAS at NILU, Part of DOI: <https://doi.org/10.48597/FE62-AXAY>

Rüdiger, J., EMEP, 2023, Pm10\_mass at Schauinsland, data hosted by EBAS at NILU, Part of DOI: <https://doi.org/10.48597/XQWK-FUW7>

Rüdiger, J., EMEP, 2023, Pm10\_mass at Schmücke, data hosted by EBAS at NILU, Part of DOI: <https://doi.org/10.48597/FBM7-6PWB>

Rüdiger, J., EMEP, 2023, Pm10\_mass at Waldhof, data hosted by EBAS at NILU, Part of DOI: <https://doi.org/10.48597/V6AH-BNJM>

Rüdiger, J., EMEP, 2023, Pm10\_mass at Westerland, data hosted by EBAS at NILU, Part of DOI: <https://doi.org/10.48597/KCXH-9RX6>

Rüdiger, J., EMEP, 2023, Pm10\_mass at Zingst, data hosted by EBAS at NILU, Part of DOI: <https://doi.org/10.48597/KE6U-VR9G>

Rüdiger, J., EMEP, 2023, Pm25\_mass at Neuglobsow, data hosted by EBAS at NILU, Part of DOI: <https://doi.org/10.48597/3KHG-Y4WJ>

Rüdiger, J., EMEP, 2023, Pm25\_mass at Schauinsland, data hosted by EBAS at NILU, Part of DOI: <https://doi.org/10.48597/USGF-3SAA>

Rüdiger, J., EMEP, 2023, Pm25\_mass at Schmücke, data hosted by EBAS at NILU, Part of DOI: <https://doi.org/10.48597/66BN-ZGA9>

Rüdiger, J., EMEP, 2023, Pm25\_mass at Waldhof, data hosted by EBAS at NILU, Part of DOI: <https://doi.org/10.48597/TX9H-EAPZ>

Rüdiger, J., EMEP, HELCOM, 2021, Inorganics in air and particle phase at Zingst, data hosted by EBAS at NILU, Part of DOI: <https://doi.org/10.48597/WFDN-DWCN>, <https://doi.org/10.48597/68CN-ANKJ>

Rüdiger, J., EMEP, HELCOM, 2023, Inorganics in air and particle phase at Zingst, data hosted by EBAS at NILU, Part of DOI: <https://doi.org/10.48597/WFDN-DWCN>

Rüdiger, J., EMEP, HELCOM, 2023, Inorganics in air and particle phase at Zingst, data hosted by EBAS at NILU, Part of DOI: <https://doi.org/10.48597/WFDN-DWCN>, <https://doi.org/10.48597/68CN-ANKJ>

Ryan, M., EMEP, 2023, Inorganics in air and particle phase at Carnsore Point, data hosted by EBAS at NILU, Part of DOI: <https://doi.org/10.48597/RAH9-DBMG>

Ryan, M., EMEP, 2023, Inorganics in air and particle phase at Malin Head, data hosted by EBAS at NILU, Part of DOI: <https://doi.org/10.48597/YZH4-KWAY>

Ryan, M., EMEP, 2023, Inorganics in air and particle phase at Oak Park, data hosted by EBAS at NILU, Part of DOI: <https://doi.org/10.48597/X7PR-CMFP>

Salmi, T., AMAP, EMEP, 2014, Aluminium at Pallas (Matorova), data hosted by EBAS at NILU, Part of DOI: <https://doi.org/10.48597/TAZH-AC6C>

Salmi, T., CAMPAIGN, EMEP, 2007, Inorganics in air and particle phase at Virolahti II, data hosted by EBAS at NILU, Part of DOI: <https://doi.org/10.48597/868Y-J2CF>

Salmi, T., CAMPAIGN, EMEP, 2007, Inorganics in air and particle phase at Virolahti II, data hosted by EBAS at NILU, Part of DOI: <https://doi.org/10.48597/CCUU-C434>, <https://doi.org/10.48597/ZNKY-2GXF>

Salmi, T., CAMPAIGN, EMEP, 2007, Inorganics in air and particle phase at Virolahti II, data hosted by EBAS at NILU, Part of DOI: <https://doi.org/10.48597/XYVX-A6WT>

Salmi, T., CAMPAIGN, EMEP, 2007, PM mass at Virolahti II, data hosted by EBAS at NILU, Part of DOI: <https://doi.org/10.48597/ZNKY-2GXF>

Salmi, T., EMEP, HELCOM, 2009, Aluminium at Virolahti II, data hosted by EBAS at NILU, Part of DOI: <https://doi.org/10.48597/27YH-SRTJ>

Salmi, T., EMEP, HELCOM, 2010, Aluminium at Virolahti II, data hosted by EBAS at NILU, Part of DOI: <https://doi.org/10.48597/DP6G-WM9N>

Salmi, T., EMEP, HELCOM, 2018, Aluminium at Virolahti II, data hosted by EBAS at NILU, Part of DOI: <https://doi.org/10.48597/27YH-SRTJ>

Santroch, J., CAMPAIGN, EMEP, 2004, OC/EC and pm10\_mass at Kosetice (NAOK), data hosted by EBAS at NILU, Part of DOI: <https://doi.org/10.48597/Y3XH-VGCX>

Sauvage, S., CAMPAIGN, COLOSSAL, EMEP, 2018, OC/EC at Revin, data hosted by EBAS at NILU, Part of DOI: <https://doi.org/10.48597/V3DH-CJYK>

Sauvage, S., EMEP, 2009, Pm10\_mass at Revin, data hosted by EBAS at NILU, Part of DOI: <https://doi.org/10.48597/D6Q2-95A8>

Sauvage, S., EMEP, 2009, Pm10\_mass at Revin, data hosted by EBAS at NILU, Part of DOI: <https://doi.org/10.48597/GJWS-8R4H>

Sauvage, S., EMEP, 2010, Pm10\_mass at La Coulonche, data hosted by EBAS at NILU, Part of DOI: <https://doi.org/10.48597/XQTV-6APT>

Sauvage, S., EMEP, 2014, OC/EC and inorganics in air and particle phase at Peyrusse Vieille, data hosted by EBAS at NILU, Part of DOI: <https://doi.org/10.48597/QP6K-Y5DZ>

Sauvage, S., EMEP, 2014, OC/EC and inorganics in air and particle phase at Revin, data hosted by EBAS at NILU, Part of DOI: <https://doi.org/10.48597/RPNE-T3MW>

Sauvage, S., EMEP, 2014, Pm10\_mass at La Coulonche, data hosted by EBAS at NILU, Part of DOI: <https://doi.org/10.48597/6BDC-FAM5>

Sauvage, S., EMEP, 2014, Pm10\_mass at La Coulonche, data hosted by EBAS at NILU, Part of DOI: <https://doi.org/10.48597/XQTV-6APT>

Sauvage, S., EMEP, 2014, Pm10\_mass at La Tardière, data hosted by EBAS at NILU, Part of DOI: <https://doi.org/10.48597/QKQX-7WDV>

Sauvage, S., EMEP, 2014, Pm10\_mass at Montandon, data hosted by EBAS at NILU, Part of DOI: <https://doi.org/10.48597/43NM-GA6W>

Sauvage, S., EMEP, 2014, Pm10\_mass at Morvan, data hosted by EBAS at NILU, Part of DOI: <https://doi.org/10.48597/E45Y-TQ5E>

Sauvage, S., EMEP, 2014, Pm10\_mass at Peyrusse Vieille, data hosted by EBAS at NILU, Part of DOI: <https://doi.org/10.48597/KNXE-X6H9>

Sauvage, S., EMEP, 2014, Pm10\_mass at Revin, data hosted by EBAS at NILU, Part of DOI: <https://doi.org/10.48597/D6Q2-95A8>

Sauvage, S., EMEP, 2014, Pm25\_mass at La Coulonche, data hosted by EBAS at NILU, Part of DOI: <https://doi.org/10.48597/JPHR-Z6YD>

Sauvage, S., EMEP, 2014, Pm25\_mass at La Tardière, data hosted by EBAS at NILU, Part of DOI: <https://doi.org/10.48597/H3MA-Q3YP>

Sauvage, S., EMEP, 2014, Pm25\_mass at Peyrusse Vieille, data hosted by EBAS at NILU, Part of DOI: <https://doi.org/10.48597/NYQ5-CZTE>

Sauvage, S., EMEP, 2014, Pm25\_mass at Revin, data hosted by EBAS at NILU, Part of DOI: <https://doi.org/10.48597/4GF3-97G5>

Sauvage, S., EMEP, 2016, OC/EC and inorganics in air and particle phase at Guipry, data hosted by EBAS at NILU, Part of DOI: <https://doi.org/10.48597/GCHB-7C52>, <https://doi.org/10.48597/HY3B-J79F>

Sauvage, S., EMEP, 2016, OC/EC and inorganics in air and particle phase at Peyrusse Vieille, data hosted by EBAS at NILU, Part of DOI: <https://doi.org/10.48597/3MC5-VW4X>, <https://doi.org/10.48597/B36N-22DR>

Sauvage, S., EMEP, 2016, OC/EC and inorganics in air and particle phase at Revin, data hosted by EBAS at NILU, Part of DOI: <https://doi.org/10.48597/QP7A-8UAF>, <https://doi.org/10.48597/D5C6-UHDZ>

Sauvage, S., EMEP, 2016, OC/EC and inorganics in air and particle phase at Saint-Nazaire-le-Désert, data hosted by EBAS at NILU, Part of DOI: <https://doi.org/10.48597/4YW4-P3C2>, <https://doi.org/10.48597/GKHA-V88Z>

Sauvage, S., EMEP, 2016, OC/EC and inorganics in air and particle phase at Verneuil, data hosted by EBAS at NILU, Part of DOI: <https://doi.org/10.48597/RGQA-PA42>, <https://doi.org/10.48597/76GH-P6GY>

Sauvage, S., EMEP, 2016, Pm10\_mass at Morvan, data hosted by EBAS at NILU, Part of DOI: <https://doi.org/10.48597/E45Y-TQ5E>

Sauvage, S., EMEP, 2016, Pm10\_mass at Revin, data hosted by EBAS at NILU, Part of DOI: <https://doi.org/10.48597/D6Q2-95A8>

Sauvage, S., EMEP, 2017, Inorganics in air and particle phase at Guipry, data hosted by EBAS at NILU, Part of DOI: <https://doi.org/10.48597/65G9-QF6N>, <https://doi.org/10.48597/YBMJ-F9BC>

Sauvage, S., EMEP, 2017, Inorganics in air and particle phase at Peyrusse Vieille, data hosted by EBAS at NILU, Part of DOI: <https://doi.org/10.48597/6WRQ-NUTB>, <https://doi.org/10.48597/32HM-UHWE>

Sauvage, S., EMEP, 2017, Inorganics in air and particle phase at Revin, data hosted by EBAS at NILU, Part of DOI: <https://doi.org/10.48597/7A6U-QREQ>, <https://doi.org/10.48597/9QJZ-PEWD>

Sauvage, S., EMEP, 2017, Inorganics in air and particle phase at Saint-Nazaire-le-Désert, data hosted by EBAS at NILU, Part of DOI: <https://doi.org/10.48597/XGEA-T5TA>, <https://doi.org/10.48597/A9V2-AFPY>

Sauvage, S., EMEP, 2017, Inorganics in air and particle phase at Verneuil, data hosted by EBAS at NILU, Part of DOI: <https://doi.org/10.48597/T7MU-WC25>, <https://doi.org/10.48597/QS5G-GDVR>

Sauvage, S., EMEP, 2017, Pm25\_mass at Morvan, data hosted by EBAS at NILU, Part of DOI: <https://doi.org/10.48597/CT5Y-55JG>

Sauvage, S., EMEP, 2017, Pm25\_mass at Revin, data hosted by EBAS at NILU, Part of DOI: <https://doi.org/10.48597/4GF3-97G5>

Sauvage, S., EMEP, 2018, Inorganics in air and particle phase at Peyrusse Vieille, data hosted by EBAS at NILU, Part of DOI: <https://doi.org/10.48597/6WRQ-NUTB>, <https://doi.org/10.48597/32HM-UHWE>

Sauvage, S., EMEP, 2018, Inorganics in air and particle phase at Revin, data hosted by EBAS at NILU, Part of DOI: <https://doi.org/10.48597/7A6U-QREQ>

Sauvage, S., EMEP, 2018, OC/EC and inorganics in air and particle phase at Guipry, data hosted by EBAS at NILU, Part of DOI: <https://doi.org/10.48597/65G9-QF6N>, <https://doi.org/10.48597/YBMJ-F9BC>, <https://doi.org/10.48597/D3BV-7FC2>

Sauvage, S., EMEP, 2018, OC/EC and inorganics in air and particle phase at Saint-Nazaire-le-Désert, data hosted by EBAS at NILU, Part of DOI: <https://doi.org/10.48597/XGEA-T5TA>, <https://doi.org/10.48597/A9V2-AFPY>, <https://doi.org/10.48597/X6FU-KGHJ>

Sauvage, S., EMEP, 2018, OC/EC and inorganics in air and particle phase at Verneuil, data hosted by EBAS at NILU, Part of DOI: <https://doi.org/10.48597/T7MU-WC25>, <https://doi.org/10.48597/QS5G-GDVR>, <https://doi.org/10.48597/QV5N-3Q9F>

Sauvage, S., EMEP, 2018, OC/EC at Revin, data hosted by EBAS at NILU, Part of DOI: <https://doi.org/10.48597/YTEN-WCAM>

Sauvage, S., EMEP, 2018, Pm25\_mass at Revin, data hosted by EBAS at NILU, Part of DOI: <https://doi.org/10.48597/4GF3-97G5>

Sauvage, S., EMEP, 2019, Inorganics in air and particle phase at Guipry, data hosted by EBAS at NILU, Part of DOI: <https://doi.org/10.48597/65G9-QF6N>, <https://doi.org/10.48597/YBMJ-F9BC>

Sauvage, S., EMEP, 2019, Inorganics in air and particle phase at Peyrusse Vieille, data hosted by EBAS at NILU, Part of DOI: <https://doi.org/10.48597/6WRQ-NUTB>, <https://doi.org/10.48597/32HM-UHWE>

Sauvage, S., EMEP, 2019, Inorganics in air and particle phase at Revin, data hosted by EBAS at NILU, Part of DOI: <https://doi.org/10.48597/7A6U-QREQ>, <https://doi.org/10.48597/9QJZ-PEWD>

Sauvage, S., EMEP, 2019, Inorganics in air and particle phase at Saint-Nazaire-le-Désert, data hosted by EBAS at NILU, Part of DOI: <https://doi.org/10.48597/XGEA-T5TA>, <https://doi.org/10.48597/A9V2-AFPY>

Sauvage, S., EMEP, 2019, Inorganics in air and particle phase at Verneuil, data hosted by EBAS at NILU, Part of DOI: <https://doi.org/10.48597/T7MU-WC25>, <https://doi.org/10.48597/QS5G-GDVR>

Sauvage, S., EMEP, 2019, OC/EC at Donon, data hosted by EBAS at NILU, Part of DOI: <https://doi.org/10.48597/3XVJ-6YGG>

Sauvage, S., EMEP, 2019, OC/EC at Donon, data hosted by EBAS at NILU, Part of DOI: <https://doi.org/10.48597/F6D9-75GS>

Sauvage, S., EMEP, 2019, OC/EC at Guipry, data hosted by EBAS at NILU, Part of DOI: <https://doi.org/10.48597/SFVA-SAHN>

Sauvage, S., EMEP, 2019, OC/EC at Peyrusse Vieille, data hosted by EBAS at NILU, Part of DOI: <https://doi.org/10.48597/BNJD-GK6Y>

Sauvage, S., EMEP, 2019, OC/EC at Revin, data hosted by EBAS at NILU, Part of DOI: <https://doi.org/10.48597/Q5X2-T4PH>

Sauvage, S., EMEP, 2019, OC/EC at Saint-Nazaire-le-Désert, data hosted by EBAS at NILU, Part of DOI: <https://doi.org/10.48597/P4KP-3PFR>

Sauvage, S., EMEP, 2019, OC/EC at Verneuil, data hosted by EBAS at NILU, Part of DOI: <https://doi.org/10.48597/5WD4-2ATU>

Sauvage, S., EMEP, 2019, Pm10\_mass at Guipry, data hosted by EBAS at NILU, Part of DOI: <https://doi.org/10.48597/P65G-VHJB>

Sauvage, S., EMEP, 2019, Pm10\_mass at Morvan, data hosted by EBAS at NILU, Part of DOI: <https://doi.org/10.48597/JAJT-U6DQ>

Sauvage, S., EMEP, 2019, Pm10\_mass at Peyrusse Vieille, data hosted by EBAS at NILU, Part of DOI: <https://doi.org/10.48597/KNXE-X6H9>

Sauvage, S., EMEP, 2019, Pm25\_mass at Guipry, data hosted by EBAS at NILU, Part of DOI: <https://doi.org/10.48597/R99Y-S9D8>

Sauvage, S., EMEP, 2019, Pm25\_mass at La Coulonche, data hosted by EBAS at NILU, Part of DOI: <https://doi.org/10.48597/JPHR-Z6YD>

Sauvage, S., EMEP, 2019, Pm25\_mass at Morvan, data hosted by EBAS at NILU, Part of DOI: <https://doi.org/10.48597/S79G-B8MA>

Sauvage, S., EMEP, 2019, Pm25\_mass at Peyrusse Vieille, data hosted by EBAS at NILU, Part of DOI: <https://doi.org/10.48597/NYQ5-CZTE>

Sauvage, S., EMEP, 2019, Pm25\_mass at Verneuil, data hosted by EBAS at NILU, Part of DOI: <https://doi.org/10.48597/4HNP-DQWC>

Sauvage, S., EMEP, 2020, Pm10\_mass at Guipry, data hosted by EBAS at NILU, Part of DOI: <https://doi.org/10.48597/XNS8-2TV9>

Sauvage, S., EMEP, 2020, Pm10\_mass at La Coulonche, data hosted by EBAS at NILU, Part of DOI: <https://doi.org/10.48597/6BDC-FAM5>

Sauvage, S., EMEP, 2020, Pm25\_mass at Guipry, data hosted by EBAS at NILU, Part of DOI: <https://doi.org/10.48597/ZHT3-QNGA>

Sauvage, S., EMEP, 2020, Pm25\_mass at La Coulonche, data hosted by EBAS at NILU, Part of DOI: <https://doi.org/10.48597/ZYVZ-YG93>

Sauvage, S., EMEP, 2020, Pm25\_mass at Revin, data hosted by EBAS at NILU, Part of DOI: <https://doi.org/10.48597/WMEG-BNXX>

Sauvage, S., EMEP, 2020, Pm25\_mass at Verneuil, data hosted by EBAS at NILU, Part of DOI: <https://doi.org/10.48597/TCEC-5DNW>

Sauvage, S., EMEP, 2021, Inorganics in air and particle phase at Donon, data hosted by EBAS at NILU, Part of DOI: <https://doi.org/10.48597/U6EY-CQG8>

Sauvage, S., EMEP, 2021, Inorganics in air and particle phase at Donon, data hosted by EBAS at NILU, Part of DOI: <https://doi.org/10.48597/Y2AP-NC3S>

Sauvage, S., EMEP, 2021, Inorganics in air and particle phase at Donon, data hosted by EBAS at NILU, Part of DOI: <https://doi.org/10.48597/Z6J3-ZNE7>

Sauvage, S., EMEP, 2021, Inorganics in air and particle phase at Guipry, data hosted by EBAS at NILU, Part of DOI: <https://doi.org/10.48597/4XVQ-X8QU>, <https://doi.org/10.48597/AGQA-AZX6>

Sauvage, S., EMEP, 2021, Inorganics in air and particle phase at Guipry, data hosted by EBAS at NILU, Part of DOI: <https://doi.org/10.48597/65G9-QF6N>

Sauvage, S., EMEP, 2021, Inorganics in air and particle phase at Peyrusse Vieille, data hosted by EBAS at NILU, Part of DOI: <https://doi.org/10.48597/6WRQ-NUTB>

Sauvage, S., EMEP, 2021, Inorganics in air and particle phase at Peyrusse Vieille, data hosted by EBAS at NILU, Part of DOI: <https://doi.org/10.48597/E6PD-2EH6>, <https://doi.org/10.48597/6A5Y-PZES>

Sauvage, S., EMEP, 2021, Inorganics in air and particle phase at Revin, data hosted by EBAS at NILU, Part of DOI: <https://doi.org/10.48597/47CV-6AV6>, <https://doi.org/10.48597/QH8M-X2VU>

Sauvage, S., EMEP, 2021, Inorganics in air and particle phase at Revin, data hosted by EBAS at NILU, Part of DOI: <https://doi.org/10.48597/7A6U-QREQ>

Sauvage, S., EMEP, 2021, Inorganics in air and particle phase at Saint-Nazaire-le-Désert, data hosted by EBAS at NILU, Part of DOI: <https://doi.org/10.48597/4C78-QVUT>, <https://doi.org/10.48597/NC26-ZPD9>

Sauvage, S., EMEP, 2021, Inorganics in air and particle phase at Saint-Nazaire-le-Désert, data hosted by EBAS at NILU, Part of DOI: <https://doi.org/10.48597/XGEA-T5TA>

Sauvage, S., EMEP, 2021, Inorganics in air and particle phase at Verneuil, data hosted by EBAS at NILU, Part of DOI: <https://doi.org/10.48597/BJ4B-AKJ8>, <https://doi.org/10.48597/W5UZ-85U7>

Sauvage, S., EMEP, 2021, Inorganics in air and particle phase at Verneuil, data hosted by EBAS at NILU, Part of DOI: <https://doi.org/10.48597/T7MU-WC25>

Sauvage, S., EMEP, 2021, OC/EC at Donon, data hosted by EBAS at NILU, Part of DOI: <https://doi.org/10.48597/3XVJ-6YGI>

Sauvage, S., EMEP, 2021, OC/EC at Guipry, data hosted by EBAS at NILU, Part of DOI: <https://doi.org/10.48597/SFVA-SAHN>

Sauvage, S., EMEP, 2021, OC/EC at Peyrusse Vieille, data hosted by EBAS at NILU, Part of DOI: <https://doi.org/10.48597/BNJD-GK6Y>

Sauvage, S., EMEP, 2021, OC/EC at Revin, data hosted by EBAS at NILU, Part of DOI: <https://doi.org/10.48597/Q5X2-T4PH>

Sauvage, S., EMEP, 2021, OC/EC at Saint-Nazaire-le-Désert, data hosted by EBAS at NILU, Part of DOI: <https://doi.org/10.48597/P4KP-3PFR>

Sauvage, S., EMEP, 2021, OC/EC at Verneuil, data hosted by EBAS at NILU, Part of DOI: <https://doi.org/10.48597/5WD4-2ATU>

Sauvage, S., EMEP, 2021, Pm10\_mass at Guipry, data hosted by EBAS at NILU, Part of DOI: <https://doi.org/10.48597/XNS8-2TV9>

Sauvage, S., EMEP, 2021, Pm10\_mass at La Coulonche, data hosted by EBAS at NILU, Part of DOI: <https://doi.org/10.48597/6BDC-FAM5>

Sauvage, S., EMEP, 2021, Pm10\_mass at Saint-Nazaire-le-Désert, data hosted by EBAS at NILU, Part of DOI: <https://doi.org/10.48597/D6U8-XYB6>

Sauvage, S., EMEP, 2021, Pm25\_mass at Guipry, data hosted by EBAS at NILU, Part of DOI: <https://doi.org/10.48597/ZHT3-QNGA>

Sauvage, S., EMEP, 2021, Pm25\_mass at La Coulonche, data hosted by EBAS at NILU, Part of DOI: <https://doi.org/10.48597/ZYVZ-YG93>

Sauvage, S., EMEP, 2021, Pm25\_mass at Saint-Nazaire-le-Désert, data hosted by EBAS at NILU, Part of DOI: <https://doi.org/10.48597/7ZJG-4QMN>

Sauvage, S., EMEP, 2021, Sulphate corrected at Donon, data hosted by EBAS at NILU, Part of DOI: <https://doi.org/10.48597/DUNJ-NUVU>

Sauvage, S., EMEP, 2023, Pm10\_mass at Montandon, data hosted by EBAS at NILU, Part of DOI: <https://doi.org/10.48597/43NM-GA6W>

Sauvage, S., EMEP, 2023, Pm10\_mass at Revin, data hosted by EBAS at NILU, Part of DOI: <https://doi.org/10.48597/PSBV-D2TU>

Sauvage, S., EMEP, 2024, PM mass at Donon, data hosted by EBAS at NILU, Part of DOI: <https://doi.org/10.48597/XBKN-UPKG>

Sauvage, S., EMEP, 2024, PM mass at Peyrusse Vieille, data hosted by EBAS at NILU, Part of DOI: <https://doi.org/10.48597/NPFV-RJ9Z>

Sauvage, S., EMEP, 2024, Pm10\_mass at La Tardière, data hosted by EBAS at NILU, Part of DOI: <https://doi.org/10.48597/QKQX-7WDV>

Sauvage, S., EMEP, 2024, Pm10\_mass at Montandon, data hosted by EBAS at NILU, Part of DOI: <https://doi.org/10.48597/43NM-GA6W>

Sauvage, S., EMEP, 2024, Pm10\_mass at Morvan, data hosted by EBAS at NILU, Part of DOI: <https://doi.org/10.48597/QTKR-EY62>

Sauvage, S., EMEP, 2024, Pm25\_mass at La Tardière, data hosted by EBAS at NILU, Part of DOI: <https://doi.org/10.48597/H3MA-Q3YP>

Sauvage, S., EMEP, 2024, Pm25\_mass at Morvan, data hosted by EBAS at NILU, Part of DOI: <https://doi.org/10.48597/4VFR-JG55>

Sauvage, S., EMEP, 2024, Pm25\_mass at Verneuil, data hosted by EBAS at NILU, Part of DOI: <https://doi.org/10.48597/9EQX-AQY2>

Savvides, C., EMEP, 2024, Aluminium and inorganics in air and particle phase at Agia Marina Xyliatou / Cyprus Atmospheric Observatory, data hosted by EBAS at NILU, Part of DOI: <https://doi.org/10.48597/3D23-MMN6>

Savvides, C., EMEP, 2024, Aluminium and inorganics in air and particle phase at Agia Marina Xyliatou / Cyprus Atmospheric Observatory, data hosted by EBAS at NILU, Part of DOI: <https://doi.org/10.48597/DWN4-T22K>, <https://doi.org/10.48597/MAQS-NCGB>, <https://doi.org/10.48597/KWQP-BVM7>, <https://doi.org/10.48597/MW89-BNHQ>, <https://doi.org/10.48597/GUXM-E64D>, <https://doi.org/10.48597/S89A-55PD>, <https://doi.org/10.48597/H7E2-W5FY>

Savvides, C., EMEP, 2024, Aluminium and inorganics in air and particle phase at Agia Marina Xyliatou / Cyprus Atmospheric Observatory, data hosted by EBAS at NILU, Part of DOI: <https://doi.org/10.48597/DWN4-T22K>, <https://doi.org/10.48597/XENK-CMFU>, <https://doi.org/10.48597/FDSY-VBB3>, <https://doi.org/10.48597/Z9HM-85AN>, <https://doi.org/10.48597/MVGM-GDSK>, <https://doi.org/10.48597/HZXC-8D7Q>, <https://doi.org/10.48597/H7E2-W5FY>

Savvides, C., EMEP, 2024, Aluminium and inorganics in air and particle phase at Agia Marina Xyliatou / Cyprus Atmospheric Observatory, data hosted by EBAS at NILU, Part of DOI: <https://doi.org/10.48597/JFF9-GMTV>

Savvides, C., EMEP, 2024, Aluminium and pm10\_mass at Agia Marina Xyliatou / Cyprus Atmospheric Observatory, data hosted by EBAS at NILU, Part of DOI: <https://doi.org/10.48597/DWN4-T22K>, <https://doi.org/10.48597/HVSC-5TJP>

Savvides, C., EMEP, 2024, Aluminium at Agia Marina Xyliatou / Cyprus Atmospheric Observatory, data hosted by EBAS at NILU, Part of DOI: <https://doi.org/10.48597/HVSC-5TJP>

Savvides, C., EMEP, 2024, OC/EC and inorganics in air and particle phase at Agia Marina Xyliatou / Cyprus Atmospheric Observatory, data hosted by EBAS at NILU, Part of DOI: <https://doi.org/10.48597/DWN4-T22K>, <https://doi.org/10.48597/ES8V-RZSQ>, <https://doi.org/10.48597/MA2K-FZER>

Savvides, C., EMEP, 2024, OC/EC and inorganics in air and particle phase at Agia Marina Xyliatou / Cyprus Atmospheric Observatory, data hosted by EBAS at NILU, Part of DOI: <https://doi.org/10.48597/MAQS-NCGB>, <https://doi.org/10.48597/KWQP-BVM7>, <https://doi.org/10.48597/MW89-BNHQ>, <https://doi.org/10.48597/GUXM-E64D>, <https://doi.org/10.48597/S89A-55PD>, <https://doi.org/10.48597/UWKD-RHU2>

Savvides, C., EMEP, 2024, Pm25\_mass at Agia Marina Xyliatou / Cyprus Atmospheric Observatory, data hosted by EBAS at NILU, Part of DOI: <https://doi.org/10.48597/K58S-B9SZ>

Schnaider, J., CAMPAIGN, EMEP, 2004, OC/EC and pm10\_mass at Illmitz, data hosted by EBAS at NILU, Part of DOI: <https://doi.org/10.48597/T5MF-YWM3>

Sciare, J., Crenn, V., Petit, J., GAW-WDCA, 2013, Pm10\_mass at SIRTa Atmospheric Research Observatory, data hosted by EBAS at NILU, Part of DOI: <https://doi.org/10.48597/YER7-CKFQ>

Sellegrì, K., ACTRIS, EMEP, EUSAAR, GAW-WDCA, 2016, OC/EC at Puy de Dôme, data hosted by EBAS at NILU, Part of DOI: <https://doi.org/10.48597/USYK-S69Z>

Sellegrì, K., ACTRIS, EMEP, GAW-WDCA, 2015, OC/EC at Puy de Dôme, data hosted by EBAS at NILU, Part of DOI: <https://doi.org/10.48597/ZG79-TSBG>

Sellegrì, K., EMEP, EUSAAR, GAW-WDCA, 2008, OC/EC at Puy de Dôme, data hosted by EBAS at NILU, Part of DOI: <https://doi.org/10.48597/D3Z5-ZFRP>

Sellegrì, K., EMEP, EUSAAR, GAW-WDCA, 2010, OC/EC at Puy de Dôme, data hosted by EBAS at NILU, Part of DOI: <https://doi.org/10.48597/MY4X-QQFB>

Sellegrì, K., EMEP, EUSAAR, GAW-WDCA, 2015, OC/EC at Puy de Dôme, data hosted by EBAS at NILU, Part of DOI: <https://doi.org/10.48597/63B3-EU6K>

Sellegrì, K., EMEP, EUSAAR, GAW-WDCA, 2016, OC/EC at Puy de Dôme, data hosted by EBAS at NILU, Part of DOI: <https://doi.org/10.48597/25WG-HVUC>

Sellegrì, K., EMEP, EUSAAR, GAW-WDCA, 2016, OC/EC at Puy de Dôme, data hosted by EBAS at NILU, Part of DOI: <https://doi.org/10.48597/25WG-HVUC>, <https://doi.org/10.48597/MY4X-QQFB>

Sellegrì, K., EMEP, EUSAAR, GAW-WDCA, 2016, OC/EC at Puy de Dôme, data hosted by EBAS at NILU, Part of DOI: <https://doi.org/10.48597/GE5T-58D4>

Sellegrì, K., EMEP, EUSAAR, GAW-WDCA, 2016, OC/EC at Puy de Dôme, data hosted by EBAS at NILU, Part of DOI: <https://doi.org/10.48597/KCFG-VHEZ>

Sjoberg, K., CAMP, EMEP, 2014, Pm10\_mass at Råö, data hosted by EBAS at NILU, Part of DOI: <https://doi.org/10.48597/VA2A-MKG4>

Sjoberg, K., CAMP, EMEP, 2014, Pm25\_mass at Råö, data hosted by EBAS at NILU, Part of DOI: <https://doi.org/10.48597/U255-8RYG>

Sjoberg, K., EMEP, 2006, PM mass at Aspvreten, data hosted by EBAS at NILU, Part of DOI: <https://doi.org/10.48597/PYMH-YKVX>

Sjoberg, K., EMEP, 2006, PM mass at Vavihill, data hosted by EBAS at NILU, Part of DOI: <https://doi.org/10.48597/FFNB-DYPZ>

Sjoberg, K., EMEP, 2009, PM mass at Aspvreten, data hosted by EBAS at NILU, Part of DOI: <https://doi.org/10.48597/39BV-5QYM>

Sjoberg, K., EMEP, 2009, PM mass at Råö, data hosted by EBAS at NILU, Part of DOI: <https://doi.org/10.48597/BVDR-J6AG>

Sjoberg, K., EMEP, 2009, PM mass at Vavihill, data hosted by EBAS at NILU, Part of DOI: <https://doi.org/10.48597/A4XG-7MG4>, <https://doi.org/10.48597/CJGF-H5ZC>

Sjoberg, K., EMEP, 2009, PM mass at Vindeln, data hosted by EBAS at NILU, Part of DOI: <https://doi.org/10.48597/5U3F-KEZH>, <https://doi.org/10.48597/XWMP-T7CN>

Sjoberg, K., EMEP, 2009, Pm10\_mass at Vindeln, data hosted by EBAS at NILU, Part of DOI: <https://doi.org/10.48597/5U3F-KEZH>

Sjoberg, K., EMEP, 2011, Pm10\_mass at Aspvreten, data hosted by EBAS at NILU, Part of DOI: <https://doi.org/10.48597/UGGB-PXC7>

Sjoberg, K., EMEP, 2011, Pm25\_mass at Råö, data hosted by EBAS at NILU, Part of DOI: <https://doi.org/10.48597/U255-8RYG>

Sjoberg, K., EMEP, 2012, PM mass at Råö, data hosted by EBAS at NILU, Part of DOI: <https://doi.org/10.48597/YUX9-8G8Q>

Sjoberg, K., EMEP, 2012, Pm10\_mass at Aspvreten, data hosted by EBAS at NILU, Part of DOI: <https://doi.org/10.48597/W6XF-FPSJ>

Sjoberg, K., EMEP, 2012, Pm10\_mass at Bredkålen, data hosted by EBAS at NILU, Part of DOI: <https://doi.org/10.48597/CD8N-SXWS>

Sjoberg, K., EMEP, 2012, Pm10\_mass at Vavihill, data hosted by EBAS at NILU, Part of DOI: <https://doi.org/10.48597/7YEJ-WHFP>

Sjoberg, K., EMEP, 2012, Pm25\_mass at Aspvreten, data hosted by EBAS at NILU, Part of DOI: <https://doi.org/10.48597/Z82G-42SR>

Sjoberg, K., EMEP, 2012, Pm25\_mass at Bredkålen, data hosted by EBAS at NILU, Part of DOI: <https://doi.org/10.48597/SGEG-NKEH>

Sjoberg, K., EMEP, 2012, Pm25\_mass at Vavihill, data hosted by EBAS at NILU, Part of DOI: <https://doi.org/10.48597/A4XG-7MG4>

Sjoberg, K., EMEP, 2013, Pm10\_mass at Aspvreten, data hosted by EBAS at NILU, Part of DOI: <https://doi.org/10.48597/W6XF-FPSJ>

Sjoberg, K., EMEP, 2013, Pm10\_mass at Bredkålen, data hosted by EBAS at NILU, Part of DOI: <https://doi.org/10.48597/CD8N-SXWS>

Sjoberg, K., EMEP, 2013, Pm10\_mass at Råö, data hosted by EBAS at NILU, Part of DOI: <https://doi.org/10.48597/VA2A-MKG4>

Sjoberg, K., EMEP, 2013, Pm10\_mass at Vavihill, data hosted by EBAS at NILU, Part of DOI: <https://doi.org/10.48597/7YEJ-WHFP>

Sjoberg, K., EMEP, 2013, Pm25\_mass at Aspvreten, data hosted by EBAS at NILU, Part of DOI: <https://doi.org/10.48597/Z82G-42SR>

Sjoberg, K., EMEP, 2013, Pm25\_mass at Bredkålen, data hosted by EBAS at NILU, Part of DOI: <https://doi.org/10.48597/SGEG-NKEH>

Sjoberg, K., EMEP, 2013, Pm25\_mass at Råö, data hosted by EBAS at NILU, Part of DOI: <https://doi.org/10.48597/U255-8RYG>

Sjoberg, K., EMEP, 2013, Pm25\_mass at Vavihill, data hosted by EBAS at NILU, Part of DOI: <https://doi.org/10.48597/A4XG-7MG4>

Sjoberg, K., EMEP, 2014, PM mass at Aspvreten, data hosted by EBAS at NILU, Part of DOI: <https://doi.org/10.48597/39BV-5QYM>

Sjoberg, K., EMEP, 2014, PM mass at Råö, data hosted by EBAS at NILU, Part of DOI: <https://doi.org/10.48597/YUX9-8G8Q>

Sjoberg, K., EMEP, 2014, PM mass at Vavihill, data hosted by EBAS at NILU, Part of DOI: <https://doi.org/10.48597/A4XG-7MG4>, <https://doi.org/10.48597/CJGF-H5ZC>

Sjoberg, K., EMEP, 2014, PM mass at Vindeln, data hosted by EBAS at NILU, Part of DOI: <https://doi.org/10.48597/5U3F-KEZH>, <https://doi.org/10.48597/XWMP-T7CN>

Sjoberg, K., EMEP, 2014, Pm10\_mass at Aspvreten, data hosted by EBAS at NILU, Part of DOI: <https://doi.org/10.48597/W6XF-FPSJ>

Sjoberg, K., EMEP, 2014, Pm10\_mass at Bredkålen, data hosted by EBAS at NILU, Part of DOI: <https://doi.org/10.48597/CD8N-SXWS>

Sjoberg, K., EMEP, 2014, Pm10\_mass at Råö, data hosted by EBAS at NILU, Part of DOI: <https://doi.org/10.48597/VA2A-MKG4>

Sjoberg, K., EMEP, 2014, Pm10\_mass at Vavihill, data hosted by EBAS at NILU, Part of DOI: <https://doi.org/10.48597/7YEJ-WHFP>

Sjoberg, K., EMEP, 2014, Pm25\_mass at Aspvreten, data hosted by EBAS at NILU, Part of DOI: <https://doi.org/10.48597/Z82G-42SR>

Sjoberg, K., EMEP, 2014, Pm25\_mass at Bredkålen, data hosted by EBAS at NILU, Part of DOI: <https://doi.org/10.48597/SGEG-NKEH>

Sjoberg, K., EMEP, 2014, Pm25\_mass at Vavihill, data hosted by EBAS at NILU, Part of DOI: <https://doi.org/10.48597/A4XG-7MG4>

Sjoberg, K., EMEP, 2015, PM mass at Aspvreten, data hosted by EBAS at NILU, Part of DOI: <https://doi.org/10.48597/FANR-XNAY>, <https://doi.org/10.48597/2N7Q-NGNN>

Sjoberg, K., EMEP, 2015, Pm10\_mass at Aspvreten, data hosted by EBAS at NILU, Part of DOI: <https://doi.org/10.48597/W6XF-FPSJ>



Sjøberg, K., EMEP, 2015, Pm10\_mass at Bredkålen, data hosted by EBAS at NILU, Part of DOI: <https://doi.org/10.48597/CD8N-SXWS>

Sjøberg, K., EMEP, 2015, Pm10\_mass at Råö, data hosted by EBAS at NILU, Part of DOI: <https://doi.org/10.48597/G2E4-9G8U>

Sjøberg, K., EMEP, 2015, Pm10\_mass at Vavihill, data hosted by EBAS at NILU, Part of DOI: <https://doi.org/10.48597/7YEJ-WHFP>

Sjøberg, K., EMEP, 2015, Pm10\_mass at Vavihill, data hosted by EBAS at NILU, Part of DOI: <https://doi.org/10.48597/TN7C-GPPT>

Sjøberg, K., EMEP, 2015, Pm25\_mass at Aspvreten, data hosted by EBAS at NILU, Part of DOI: <https://doi.org/10.48597/2Y8P-ZCUQ>

Sjøberg, K., EMEP, 2015, Pm25\_mass at Aspvreten, data hosted by EBAS at NILU, Part of DOI: <https://doi.org/10.48597/M7TU-9695>

Sjøberg, K., EMEP, 2015, Pm25\_mass at Råö, data hosted by EBAS at NILU, Part of DOI: <https://doi.org/10.48597/B2A5-GHVM>

Sjøberg, K., EMEP, 2015, Pm25\_mass at Vavihill, data hosted by EBAS at NILU, Part of DOI: <https://doi.org/10.48597/A4XG-7MG4>

Sjøberg, K., EMEP, 2016, PM mass at Aspvreten, data hosted by EBAS at NILU, Part of DOI: <https://doi.org/10.48597/FANR-XNAY>, <https://doi.org/10.48597/2N7Q-NGNN>

Sjøberg, K., EMEP, 2016, Pm10\_mass at Aspvreten, data hosted by EBAS at NILU, Part of DOI: <https://doi.org/10.48597/FANR-XNAY>

Sjøberg, K., EMEP, 2016, Pm10\_mass at Aspvreten, data hosted by EBAS at NILU, Part of DOI: <https://doi.org/10.48597/HQ55-J2VA>

Sjøberg, K., EMEP, 2016, Pm10\_mass at Bredkålen, data hosted by EBAS at NILU, Part of DOI: <https://doi.org/10.48597/CD8N-SXWS>

Sjøberg, K., EMEP, 2016, Pm10\_mass at Råö, data hosted by EBAS at NILU, Part of DOI: <https://doi.org/10.48597/G2E4-9G8U>

Sjøberg, K., EMEP, 2016, Pm10\_mass at Vavihill, data hosted by EBAS at NILU, Part of DOI: <https://doi.org/10.48597/TN7C-GPPT>

Sjøberg, K., EMEP, 2016, Pm25\_mass at Aspvreten, data hosted by EBAS at NILU, Part of DOI: <https://doi.org/10.48597/2Y8P-ZCUQ>

Sjøberg, K., EMEP, 2016, Pm25\_mass at Bredkålen, data hosted by EBAS at NILU, Part of DOI: <https://doi.org/10.48597/VXQV-4SYZ>

Sjøberg, K., EMEP, 2016, Pm25\_mass at Råö, data hosted by EBAS at NILU, Part of DOI: <https://doi.org/10.48597/B2A5-GHVM>

Sjøberg, K., EMEP, 2016, Pm25\_mass at Vavihill, data hosted by EBAS at NILU, Part of DOI: <https://doi.org/10.48597/58JQ-SFQX>

Sjøberg, K., EMEP, 2017, Pm10\_mass at Aspvreten, data hosted by EBAS at NILU, Part of DOI: <https://doi.org/10.48597/HQ55-J2VA>

Sjøberg, K., EMEP, 2017, Pm10\_mass at Bredkålen, data hosted by EBAS at NILU, Part of DOI: <https://doi.org/10.48597/CD8N-SXWS>

Sjøberg, K., EMEP, 2017, Pm10\_mass at Råö, data hosted by EBAS at NILU, Part of DOI: <https://doi.org/10.48597/G2E4-9G8U>

Sjøberg, K., EMEP, 2017, Pm10\_mass at Vavihill, data hosted by EBAS at NILU, Part of DOI: <https://doi.org/10.48597/TN7C-GPPT>

Sjøberg, K., EMEP, 2017, Pm25\_mass at Aspvreten, data hosted by EBAS at NILU, Part of DOI: <https://doi.org/10.48597/2Y8P-ZCUQ>

Sjøberg, K., EMEP, 2017, Pm25\_mass at Bredkålen, data hosted by EBAS at NILU, Part of DOI: <https://doi.org/10.48597/VXQV-4SYZ>

Sjøberg, K., EMEP, 2017, Pm25\_mass at Råö, data hosted by EBAS at NILU, Part of DOI: <https://doi.org/10.48597/B2A5-GHVM>

Sjøberg, K., EMEP, 2017, Pm25\_mass at Vavihill, data hosted by EBAS at NILU, Part of DOI: <https://doi.org/10.48597/PXW4-JS7C>

Sjøberg, K., EMEP, 2018, PM mass at Vavihill, data hosted by EBAS at NILU, Part of DOI: <https://doi.org/10.48597/TN7C-GPPT>, <https://doi.org/10.48597/A4XG-7MG4>

Sjøberg, K., EMEP, 2018, Pm10\_mass at Aspvreten, data hosted by EBAS at NILU, Part of DOI: <https://doi.org/10.48597/HQ55-J2VA>

Sjöberg, K., EMEP, 2018, Pm10\_mass at Bredkälén, data hosted by EBAS at NILU, Part of DOI: <https://doi.org/10.48597/CD8N-SXWS>

Sjöberg, K., EMEP, 2018, Pm10\_mass at Råö, data hosted by EBAS at NILU, Part of DOI: <https://doi.org/10.48597/G2E4-9G8U>

Sjöberg, K., EMEP, 2018, Pm25\_mass at Aspvreten, data hosted by EBAS at NILU, Part of DOI: <https://doi.org/10.48597/2Y8P-ZCUQ>

Sjöberg, K., EMEP, 2018, Pm25\_mass at Bredkälén, data hosted by EBAS at NILU, Part of DOI: <https://doi.org/10.48597/VXQV-4SYZ>

Sjöberg, K., EMEP, 2018, Pm25\_mass at Råö, data hosted by EBAS at NILU, Part of DOI: <https://doi.org/10.48597/B2A5-GHVM>

Sjöberg, K., EMEP, 2019, Pm10\_mass at Bredkälén, data hosted by EBAS at NILU, Part of DOI: <https://doi.org/10.48597/4GWD-HZH9>

Sjöberg, K., EMEP, 2019, Pm10\_mass at Norunda Stenen, data hosted by EBAS at NILU, Part of DOI: <https://doi.org/10.48597/XAYT-HHYU>

Sjöberg, K., EMEP, 2019, Pm10\_mass at Råö, data hosted by EBAS at NILU, Part of DOI: <https://doi.org/10.48597/DSEZ-UKT5>

Sjöberg, K., EMEP, 2019, Pm25\_mass at Bredkälén, data hosted by EBAS at NILU, Part of DOI: <https://doi.org/10.48597/VXQV-4SYZ>

Sjöberg, K., EMEP, 2019, Pm25\_mass at Norunda Stenen, data hosted by EBAS at NILU, Part of DOI: <https://doi.org/10.48597/AAAH-ASNV>

Sjöberg, K., EMEP, 2019, Pm25\_mass at Råö, data hosted by EBAS at NILU, Part of DOI: <https://doi.org/10.48597/B2A5-GHVM>

Sjöberg, K., EMEP, 2020, Pm10\_mass at Bredkälén, data hosted by EBAS at NILU, Part of DOI: <https://doi.org/10.48597/4GWD-HZH9>

Sjöberg, K., EMEP, 2020, Pm10\_mass at Norunda Stenen, data hosted by EBAS at NILU, Part of DOI: <https://doi.org/10.48597/XAYT-HHYU>

Sjöberg, K., EMEP, 2020, Pm10\_mass at Råö, data hosted by EBAS at NILU, Part of DOI: <https://doi.org/10.48597/DSEZ-UKT5>

Sjöberg, K., EMEP, 2020, Pm25\_mass at Bredkälén, data hosted by EBAS at NILU, Part of DOI: <https://doi.org/10.48597/VXQV-4SYZ>

Sjöberg, K., EMEP, 2020, Pm25 mass at Norunda Stenen, data hosted by EBAS at NILU, Part of DOI: <https://doi.org/10.48597/3RGM-78PS>

Sjöberg, K., EMEP, 2020, Pm25\_mass at Råö, data hosted by EBAS at NILU, Part of DOI: <https://doi.org/10.48597/B2A5-GHVM>

Sjöberg, K., EMEP, 2021, PM mass at Norunda Stenen, data hosted by EBAS at NILU, Part of DOI: <https://doi.org/10.48597/62MQ-F8D5>, <https://doi.org/10.48597/3RGM-78PS>

Sjöberg, K., EMEP, 2021, Pm10\_mass at Bredkälén, data hosted by EBAS at NILU, Part of DOI: <https://doi.org/10.48597/4GWD-HZH9>

Sjöberg, K., EMEP, 2021, Pm10\_mass at Råö, data hosted by EBAS at NILU, Part of DOI: <https://doi.org/10.48597/DSEZ-UKT5>

Sjöberg, K., EMEP, 2021, Pm25\_mass at Bredkälén, data hosted by EBAS at NILU, Part of DOI: <https://doi.org/10.48597/VXQV-4SYZ>

Sjöberg, K., EMEP, 2021, Pm25\_mass at Råö, data hosted by EBAS at NILU, Part of DOI: <https://doi.org/10.48597/B2A5-GHVM>

Sjöberg, K., EMEP, 2022, PM mass at Bredkälén, data hosted by EBAS at NILU, Part of DOI: <https://doi.org/10.48597/4GWD-HZH9>, <https://doi.org/10.48597/VB2T-PQ4T>

Sjöberg, K., EMEP, 2022, PM mass at Norunda Stenen, data hosted by EBAS at NILU, Part of DOI: <https://doi.org/10.48597/62MQ-F8D5>, <https://doi.org/10.48597/3RGM-78PS>

Sjöberg, K., EMEP, 2022, PM mass at Råö, data hosted by EBAS at NILU, Part of DOI: <https://doi.org/10.48597/DSEZ-UKT5>, <https://doi.org/10.48597/MV3F-AY4J>

Sjöberg, K., EMEP, 2022, Pm25\_mass at Bredkälén, data hosted by EBAS at NILU, Part of DOI: <https://doi.org/10.48597/VXQV-4SYZ>

Sjöberg, K., EMEP, 2022, Pm25\_mass at Råö, data hosted by EBAS at NILU, Part of DOI: <https://doi.org/10.48597/B2A5-GHVM>

Smyrnioudi, V., EMEP, 2008, Pm10\_mass at Aliartos, data hosted by EBAS at NILU, Part of DOI: <https://doi.org/10.48597/F24D-GY93>

Smyrnioudi, V., EMEP, 2017, Pm10\_mass at Aliartos, data hosted by EBAS at NILU, Part of DOI: <https://doi.org/10.48597/S4SM-Y35K>

Söderlund, K., EMEP, 2024, PM mass at Bredkålen, data hosted by EBAS at NILU, Part of DOI: <https://doi.org/10.48597/4GWD-HZH9>, <https://doi.org/10.48597/VB2T-PQ4T>

Söderlund, K., EMEP, 2024, PM mass at Råö, data hosted by EBAS at NILU, Part of DOI: <https://doi.org/10.48597/DSEZ-UKT5>, <https://doi.org/10.48597/MV3F-AY4J>

Söderlund, K., EMEP, 2024, Pm25\_mass at Bredkålen, data hosted by EBAS at NILU, Part of DOI: <https://doi.org/10.48597/VXQV-4SYZ>

Spangl, W., Buxbaum, I., CAMPAIGN, EMEP, 2022, OC/EC at Illmitz, data hosted by EBAS at NILU, Part of DOI: <https://doi.org/10.48597/YA3X-2MSY>, <https://doi.org/10.48597/DRMD-EJ46>

Spangl, W., Buxbaum, I., EMEP, 2016, PM mass at Illmitz, data hosted by EBAS at NILU, Part of DOI: <https://doi.org/10.48597/Y88V-UDX2>, <https://doi.org/10.48597/SM4S-3XN6>

Spangl, W., Buxbaum, I., EMEP, 2016, Pm10\_mass at Vorhegg, data hosted by EBAS at NILU, Part of DOI: <https://doi.org/10.48597/CXDN-X9ME>

Spangl, W., Buxbaum, I., EMEP, 2016, Pm10\_mass at Zoebelboden, data hosted by EBAS at NILU, Part of DOI: <https://doi.org/10.48597/QUBU-83SV>

Spangl, W., Buxbaum, I., EMEP, 2017, PM mass at Illmitz, data hosted by EBAS at NILU, Part of DOI: <https://doi.org/10.48597/Y88V-UDX2>, <https://doi.org/10.48597/SM4S-3XN6>

Spangl, W., Buxbaum, I., EMEP, 2017, Pm10\_mass at Vorhegg, data hosted by EBAS at NILU, Part of DOI: <https://doi.org/10.48597/CXDN-X9ME>

Spangl, W., Buxbaum, I., EMEP, 2017, Pm10\_mass at Zoebelboden, data hosted by EBAS at NILU, Part of DOI: <https://doi.org/10.48597/QUBU-83SV>

Spangl, W., Buxbaum, I., EMEP, 2018, PM mass at Illmitz, data hosted by EBAS at NILU, Part of DOI: <https://doi.org/10.48597/Y88V-UDX2>, <https://doi.org/10.48597/SM4S-3XN6>

Spangl, W., Buxbaum, I., EMEP, 2018, Pm10\_mass at Vorhegg, data hosted by EBAS at NILU, Part of DOI: <https://doi.org/10.48597/CXDN-X9ME>

Spangl, W., Buxbaum, I., EMEP, 2018, Pm10\_mass at Zoebelboden, data hosted by EBAS at NILU, Part of DOI: <https://doi.org/10.48597/QUBU-83SV>

Spangl, W., Buxbaum, I., EMEP, 2019, PM mass at Illmitz, data hosted by EBAS at NILU, Part of DOI: <https://doi.org/10.48597/Y88V-UDX2>, <https://doi.org/10.48597/SM4S-3XN6>

Spangl, W., Buxbaum, I., EMEP, 2019, Pm10\_mass at Vorhegg, data hosted by EBAS at NILU, Part of DOI: <https://doi.org/10.48597/CXDN-X9ME>

Spangl, W., Buxbaum, I., EMEP, 2019, Pm10\_mass at Zoebelboden, data hosted by EBAS at NILU, Part of DOI: <https://doi.org/10.48597/QUBU-83SV>

Spangl, W., Buxbaum, I., EMEP, 2020, PM mass at Illmitz, data hosted by EBAS at NILU, Part of DOI: <https://doi.org/10.48597/Y88V-UDX2>, <https://doi.org/10.48597/SM4S-3XN6>

Spangl, W., Buxbaum, I., EMEP, 2020, Pm10\_mass at Vorhegg, data hosted by EBAS at NILU, Part of DOI: <https://doi.org/10.48597/CXDN-X9ME>

Spangl, W., Buxbaum, I., EMEP, 2020, Pm10\_mass at Zoebelboden, data hosted by EBAS at NILU, Part of DOI: <https://doi.org/10.48597/QUBU-83SV>

Spangl, W., Buxbaum, I., EMEP, 2021, PM mass at Illmitz, data hosted by EBAS at NILU, Part of DOI: <https://doi.org/10.48597/Y88V-UDX2>, <https://doi.org/10.48597/SM4S-3XN6>

Spangl, W., Buxbaum, I., EMEP, 2021, Pm10\_mass at Vorhegg, data hosted by EBAS at NILU, Part of DOI: <https://doi.org/10.48597/CXDN-X9ME>

Spangl, W., Buxbaum, I., EMEP, 2021, Pm10\_mass at Zoebelboden, data hosted by EBAS at NILU, Part of DOI: <https://doi.org/10.48597/QUBU-83SV>

Spangl, W., Buxbaum, I., EMEP, 2022, PM mass at Illmitz, data hosted by EBAS at NILU, Part of DOI: <https://doi.org/10.48597/Y88V-UDX2>, <https://doi.org/10.48597/SM4S-3XN6>

Spangl, W., Buxbaum, I., EMEP, 2022, Pm10\_mass at Vorhegg, data hosted by EBAS at NILU, Part of DOI: <https://doi.org/10.48597/CXDN-X9ME>

Spangl, W., Buxbaum, I., EMEP, 2022, Pm10\_mass at Zoebelboden, data hosted by EBAS at NILU, Part of DOI: <https://doi.org/10.48597/QUBU-83SV>

Spangl, W., Buxbaum, I., EMEP, 2023, PM mass at Illmitz, data hosted by EBAS at NILU, Part of DOI: <https://doi.org/10.48597/Y88V-UDX2>, <https://doi.org/10.48597/SM4S-3XN6>

Spangl, W., Buxbaum, I., EMEP, 2023, Pm10\_mass at Vorhegg, data hosted by EBAS at NILU, Part of DOI: <https://doi.org/10.48597/CXDN-X9ME>

Spangl, W., Buxbaum, I., EMEP, 2023, Pm10\_mass at Zoebelboden, data hosted by EBAS at NILU, Part of DOI: <https://doi.org/10.48597/QUBU-83SV>

Spindler, G., ACTRIS, EMEP, 2014, OC/EC at Melpitz, data hosted by EBAS at NILU, Part of DOI: <https://doi.org/10.48597/K22R-NWZW>

Spindler, G., ACTRIS, EMEP, 2016, OC/EC at Melpitz, data hosted by EBAS at NILU, Part of DOI: <https://doi.org/10.48597/MNCP-5QRJ>, <https://doi.org/10.48597/7Y5B-2TRZ>

Spindler, G., ACTRIS, EMEP, GAW-WDCA, 2017, OC/EC at Melpitz, data hosted by EBAS at NILU, Part of DOI: <https://doi.org/10.48597/R9PQ-ZUP5>, <https://doi.org/10.48597/7Y5B-2TRZ>

Spindler, G., CAMPAIGN, EMEP, 2009, OC/EC at Melpitz, data hosted by EBAS at NILU, Part of DOI: <https://doi.org/10.48597/S45P-4UGX>

Spindler, G., EMEP, 2011, Inorganics in air and particle phase at Melpitz, data hosted by EBAS at NILU, Part of DOI: <https://doi.org/10.48597/YHHP-83DG>

Spindler, G., EMEP, 2011, OC/EC and inorganics in air and particle phase at Melpitz, data hosted by EBAS at NILU, Part of DOI: <https://doi.org/10.48597/5745-N9JS>

Spindler, G., EMEP, 2011, OC/EC and inorganics in air and particle phase at Melpitz, data hosted by EBAS at NILU, Part of DOI: <https://doi.org/10.48597/7JJQ-VQPT>

Spindler, G., EMEP, 2011, OC/EC and inorganics in air and particle phase at Melpitz, data hosted by EBAS at NILU, Part of DOI: <https://doi.org/10.48597/PMQ3-SYAZ>

Spindler, G., EMEP, 2012, OC/EC and inorganics in air and particle phase at Melpitz, data hosted by EBAS at NILU, Part of DOI: <https://doi.org/10.48597/JQV2-HKFY>

Spindler, G., EMEP, 2012, Sulphate corrected at Melpitz, data hosted by EBAS at NILU, Part of DOI: <https://doi.org/10.48597/ZHYH-9HCU>

Spindler, G., EMEP, 2014, OC/EC and inorganics in air and particle phase at Melpitz, data hosted by EBAS at NILU, Part of DOI: <https://doi.org/10.48597/5U4T-APJN>, <https://doi.org/10.48597/RVV6-M4Z8>, <https://doi.org/10.48597/RYPC-5PNT>, <https://doi.org/10.48597/ACPX-5WY9>, <https://doi.org/10.48597/JPQJ-CF9H>, <https://doi.org/10.48597/23JN-TPFM>, <https://doi.org/10.48597/XYU7-URYW>, <https://doi.org/10.48597/XHDA-U2KV>, <https://doi.org/10.48597/N2TZ-SY72>, <https://doi.org/10.48597/XYVK-XQ9D>, <https://doi.org/10.48597/5RDZ-FHES>, <https://doi.org/10.48597/QJYK-E88Z>, <https://doi.org/10.48597/6V86-7XAD>, <https://doi.org/10.48597/7D2D-CD8W>, <https://doi.org/10.48597/T3GJ-YVJV>, <https://doi.org/10.48597/WXRH-PP6G>

Spindler, G., EMEP, 2015, Inorganics in air and particle phase at Melpitz, data hosted by EBAS at NILU, Part of DOI: <https://doi.org/10.48597/GNWC-PTY3>, <https://doi.org/10.48597/WCE7-4GY4>, <https://doi.org/10.48597/2JV3-Z4QC>, <https://doi.org/10.48597/B4BB-FDX3>, <https://doi.org/10.48597/BPDX-VAUR>, <https://doi.org/10.48597/7A6Q-VDSS>, <https://doi.org/10.48597/KRPB-UJ8S>, <https://doi.org/10.48597/GJZ2-ENRX>, <https://doi.org/10.48597/EPQZ-MESE>, <https://doi.org/10.48597/PQXD-3QNC>

Spindler, G., EMEP, 2015, Inorganics in air and particle phase at Melpitz, data hosted by EBAS at NILU, Part of DOI: <https://doi.org/10.48597/N5JP-JCTN>, <https://doi.org/10.48597/93VT-P9WQ>, <https://doi.org/10.48597/CXDA-FEPE>, <https://doi.org/10.48597/5B8Z-QE4Z>, <https://doi.org/10.48597/Y73U-4GZA>, <https://doi.org/10.48597/A6KY-WCJD>, <https://doi.org/10.48597/UK8F-H5D3>, <https://doi.org/10.48597/K2P8-Y96J>, <https://doi.org/10.48597/XY3R-XQ3V>, <https://doi.org/10.48597/57Z8-9SH4>, <https://doi.org/10.48597/T3GJ-YVJV>, <https://doi.org/10.48597/WXRH-PP6G>

Spindler, G., EMEP, 2015, Inorganics in air and particle phase at Melpitz, data hosted by EBAS at NILU, Part of DOI: <https://doi.org/10.48597/RDZ8-324F>, <https://doi.org/10.48597/NVJA-NWRD>, <https://doi.org/10.48597/S98X-8BJX>

Spindler, G., EMEP, 2015, PM mass at Melpitz, data hosted by EBAS at NILU, Part of DOI: <https://doi.org/10.48597/EPQZ-MESE>, <https://doi.org/10.48597/PQXD-3QNC>

Spindler, G., EMEP, 2016, Inorganics in air and particle phase at Melpitz, data hosted by EBAS at NILU, Part of DOI: <https://doi.org/10.48597/AAF3-U34J>, <https://doi.org/10.48597/Q6PB-BEZ2>, <https://doi.org/10.48597/XBCT-WZHQ>, <https://doi.org/10.48597/NVJA-NWRD>, <https://doi.org/10.48597/5AZX-NKF9>, <https://doi.org/10.48597/9HTB-D34V>, <https://doi.org/10.48597/RGJ5-SHKN>, <https://doi.org/10.48597/AVJQ-UPJM>, <https://doi.org/10.48597/S98X-8BJX>, <https://doi.org/10.48597/MWAX-DK5A>

Spindler, G., EMEP, 2016, PM mass at Melpitz, data hosted by EBAS at NILU, Part of DOI: <https://doi.org/10.48597/EPQZ-MESE>, <https://doi.org/10.48597/PQXD-3QNC>

Spindler, G., EMEP, 2018, OC/EC and inorganics in air and particle phase at Melpitz, data hosted by EBAS at NILU, Part of DOI: <https://doi.org/10.48597/6E66-9VEY>, <https://doi.org/10.48597/65T5-WZ3B>

Spindler, G., EMEP, 2022, Inorganics in air and particle phase at Melpitz, data hosted by EBAS at NILU, Part of DOI: <https://doi.org/10.48597/RXQV-SQGV>, <https://doi.org/10.48597/49D8-7TX4>

Spindler, G., EMEP, 2022, OC/EC and inorganics in air and particle phase at Melpitz, data hosted by EBAS at NILU, Part of DOI: <https://doi.org/10.48597/6E66-9VEY>, <https://doi.org/10.48597/65T5-WZ3B>

Spindler, G., Roedger, A., ACTRIS, EMEP, 2018, OC/EC at Melpitz, data hosted by EBAS at NILU, Part of DOI: <https://doi.org/10.48597/RJU6-3SH8>, <https://doi.org/10.48597/UEB8-XKV9>

Spindler, G., Roedger, A., ACTRIS, EMEP, 2023, OC/EC at Melpitz, data hosted by EBAS at NILU, Part of DOI: <https://doi.org/10.48597/RJU6-3SH8>, <https://doi.org/10.48597/UEB8-XKV9>

Spoor, R., ACTRIS, EMEP, 2018, OC/EC at Cabauw Wielsekade, data hosted by EBAS at NILU, Part of DOI: <https://doi.org/10.48597/9WR4-QSVH>

Spoor, R., ACTRIS, EMEP, 2023, OC/EC at Cabauw Wielsekade, data hosted by EBAS at NILU, Part of DOI: <https://doi.org/10.48597/9WR4-QSVH>

Spoor, R., CAMP, EMEP, 2020, Inorganics in air and particle phase at De Zilk, data hosted by EBAS at NILU, Part of DOI: <https://doi.org/10.48597/AXAT-VGH9>

Spoor, R., CAMP, EMEP, 2020, Inorganics in air and particle phase at De Zilk, data hosted by EBAS at NILU, Part of DOI: <https://doi.org/10.48597/P29J-T8RH>

Spoor, R., CAMP, EMEP, 2020, Inorganics in air and particle phase at De Zilk, data hosted by EBAS at NILU, Part of DOI: <https://doi.org/10.48597/P29J-T8RH>, <https://doi.org/10.48597/P7QX-KNA7>

Spoor, R., CAMP, EMEP, 2023, Inorganics in air and particle phase at De Zilk, data hosted by EBAS at NILU, Part of DOI: <https://doi.org/10.48597/VG63-MN6Z>, <https://doi.org/10.48597/WAWT-U4GB>

Spoor, R., CAMP, EMEP, 2024, Inorganics in air and particle phase at De Zilk, data hosted by EBAS at NILU, Part of DOI: <https://doi.org/10.48597/VG63-MN6Z>, <https://doi.org/10.48597/WAWT-U4GB>

Spoor, R., EMEP, 2016, Elemental carbon at Cabauw Wielsekade, data hosted by EBAS at NILU, Part of DOI: <https://doi.org/10.48597/2HZ4-4ZSC>

Spoor, R., EMEP, 2016, Organic carbon at Cabauw Wielsekade, data hosted by EBAS at NILU, Part of DOI: <https://doi.org/10.48597/2HZ4-4ZSC>

Spoor, R., EMEP, 2016, Pm10\_mass at Cabauw Wielsekade, data hosted by EBAS at NILU, Part of DOI: <https://doi.org/10.48597/928P-CD8Y>

Spoor, R., EMEP, 2016, Sodium at Bilthoven, data hosted by EBAS at NILU, Part of DOI: <https://doi.org/10.48597/CGUW-SB8X>, <https://doi.org/10.48597/QF7C-WN6X>

Spoor, R., EMEP, 2016, Sodium at Bilthoven, data hosted by EBAS at NILU, Part of DOI: <https://doi.org/10.48597/QF7C-WN6X>

Spoor, R., EMEP, 2016, Sodium at Cabauw Wielsekade, data hosted by EBAS at NILU, Part of DOI: <https://doi.org/10.48597/S3VF-YGRY>, <https://doi.org/10.48597/FRNF-X8UR>

Spoor, R., EMEP, 2018, OC/EC at Cabauw Wielsekade, data hosted by EBAS at NILU, Part of DOI: <https://doi.org/10.48597/2HZ4-4ZSC>

Spoor, R., EMEP, 2018, Pm25\_mass at Cabauw Wielsekade, data hosted by EBAS at NILU, Part of DOI: <https://doi.org/10.48597/ZCQJ-R5Y5>

Spoor, R., EMEP, 2019, Sodium at Bilthoven, data hosted by EBAS at NILU, Part of DOI: <https://doi.org/10.48597/83Z2-EUAC>

Spoor, R., EMEP, 2020, Elemental carbon at Cabauw Wielsekade, data hosted by EBAS at NILU, Part of DOI: <https://doi.org/10.48597/2HZ4-4ZSC>

Spoor, R., EMEP, 2020, Organic carbon at Cabauw Wielsekade, data hosted by EBAS at NILU, Part of DOI: <https://doi.org/10.48597/2HZ4-4ZSC>

Spoor, R., EMEP, 2020, Sodium at Cabauw Wielsekade, data hosted by EBAS at NILU, Part of DOI: <https://doi.org/10.48597/7MGW-WQKF>

Spoor, R., EMEP, 2022, Pm10\_mass at De Zilk, data hosted by EBAS at NILU, Part of DOI: <https://doi.org/10.48597/25KH-XBSU>

Spoor, R., EMEP, 2022, Pm10\_mass at Kollumerwaard, data hosted by EBAS at NILU, Part of DOI: <https://doi.org/10.48597/TZ5K-A5RQ>

Spoor, R., EMEP, 2022, Pm25\_mass at Cabauw Wielsekade, data hosted by EBAS at NILU, Part of DOI: <https://doi.org/10.48597/ZCQJ-R5Y5>

Spoor, R., EMEP, 2022, Pm25\_mass at De Zilk, data hosted by EBAS at NILU, Part of DOI: <https://doi.org/10.48597/WP7C-MHCB>

Spoor, R., EMEP, 2022, Pm25\_mass at Kollumerwaard, data hosted by EBAS at NILU, Part of DOI: <https://doi.org/10.48597/CP5W-UZH7>

Spoor, R., EMEP, 2022, Pm25\_mass at Vredepeel, data hosted by EBAS at NILU, Part of DOI: <https://doi.org/10.48597/8RBS-UE93>

Spoor, R., EMEP, 2022, Sodium at Cabauw Wielsekade, data hosted by EBAS at NILU, Part of DOI: <https://doi.org/10.48597/8KQU-THRW>  
 Spoor, R., EMEP, 2023, Inorganics in air and particle phase at Vredepeel, data hosted by EBAS at NILU, Part of DOI: <https://doi.org/10.48597/RP98-QJZP>, <https://doi.org/10.48597/W93W-TSX5>  
 Spoor, R., EMEP, 2023, Pm10\_mass at Cabauw Wielsekade, data hosted by EBAS at NILU, Part of DOI: <https://doi.org/10.48597/928P-CD8Y>  
 Spoor, R., EMEP, 2023, Pm10\_mass at De Zilk, data hosted by EBAS at NILU, Part of DOI: <https://doi.org/10.48597/25KH-XBSU>  
 Spoor, R., EMEP, 2023, Pm10\_mass at Eibergen, data hosted by EBAS at NILU, Part of DOI: <https://doi.org/10.48597/N9EB-C2C8>  
 Spoor, R., EMEP, 2023, Pm10\_mass at Kollumerwaard, data hosted by EBAS at NILU, Part of DOI: <https://doi.org/10.48597/TZ5K-A5RQ>  
 Spoor, R., EMEP, 2023, Pm10\_mass at Vredepeel, data hosted by EBAS at NILU, Part of DOI: <https://doi.org/10.48597/EP2N-FBQ6>  
 Spoor, R., EMEP, 2023, Pm25\_mass at Cabauw Wielsekade, data hosted by EBAS at NILU, Part of DOI: <https://doi.org/10.48597/ZCQJ-R5Y5>  
 Spoor, R., EMEP, 2023, Pm25\_mass at De Zilk, data hosted by EBAS at NILU, Part of DOI: <https://doi.org/10.48597/WP7C-MHCB>  
 Spoor, R., EMEP, 2023, Pm25\_mass at Kollumerwaard, data hosted by EBAS at NILU, Part of DOI: <https://doi.org/10.48597/CP5W-UZH7>  
 Spoor, R., EMEP, 2023, Pm25\_mass at Vredepeel, data hosted by EBAS at NILU, Part of DOI: <https://doi.org/10.48597/8RBS-UE93>  
 Spoor, R., EMEP, 2023, Sodium at Bilthoven, data hosted by EBAS at NILU, Part of DOI: <https://doi.org/10.48597/BBZ7-4TCC>  
 Spoor, R., EMEP, 2023, Sodium at Cabauw Wielsekade, data hosted by EBAS at NILU, Part of DOI: <https://doi.org/10.48597/8KQU-THRW>  
 Spoor, R., EMEP, 2024, Inorganics in air and particle phase at Vredepeel, data hosted by EBAS at NILU, Part of DOI: <https://doi.org/10.48597/E6F3-JRDB>  
 Spoor, R., EMEP, 2024, Inorganics in air and particle phase at Vredepeel, data hosted by EBAS at NILU, Part of DOI: <https://doi.org/10.48597/RP98-QJZP>, <https://doi.org/10.48597/W93W-TSX5>  
 Styszko, K., ACTRIS, CAMPAIGN, COLOSSAL, 2019, OC/EC at AGH University Krakow, data hosted by EBAS at NILU, Part of DOI: <https://doi.org/10.48597/CPSZ-J6SK>  
 Swart, D., EMEP, 2010, Pm25\_mass at De Zilk, data hosted by EBAS at NILU, Part of DOI: <https://doi.org/10.48597/DA4J-3AFZ>  
 Swart, D., EMEP, 2011, Pm25\_mass at Kollumerwaard, data hosted by EBAS at NILU, Part of DOI: <https://doi.org/10.48597/94XP-2M22>  
 Swart, D., EMEP, 2012, Pm25\_mass at Bilthoven, data hosted by EBAS at NILU, Part of DOI: <https://doi.org/10.48597/NUU6-ZBY2>  
 Swart, D., EMEP, 2014, Pm10\_mass at De Zilk, data hosted by EBAS at NILU, Part of DOI: <https://doi.org/10.48597/E8WP-TE2R>  
 Swart, D., EMEP, 2014, Pm10\_mass at Eibergen, data hosted by EBAS at NILU, Part of DOI: <https://doi.org/10.48597/ZFTC-V352>  
 Swart, D., EMEP, 2014, Pm10\_mass at Kollumerwaard, data hosted by EBAS at NILU, Part of DOI: <https://doi.org/10.48597/EZNH-PXC3>  
 Swart, D., EMEP, 2014, Pm10\_mass at Vredepeel, data hosted by EBAS at NILU, Part of DOI: <https://doi.org/10.48597/582X-SG9R>  
 Swart, D., EMEP, 2014, Pm25\_mass at Cabauw Zijdweg, data hosted by EBAS at NILU, Part of DOI: <https://doi.org/10.48597/JUMH-EQR5>  
 Swart, D., EMEP, 2014, Pm25\_mass at Kollumerwaard, data hosted by EBAS at NILU, Part of DOI: <https://doi.org/10.48597/UQRZ-2MU2>  
 Swart, D., EMEP, 2014, Pm25\_mass at Vredepeel, data hosted by EBAS at NILU, Part of DOI: <https://doi.org/10.48597/KXP2-3YQF>  
 Teinemaa, E., ACTRIS, CAMPAIGN, COLOSSAL, EMEP, 2019, OC/EC at Tartu, data hosted by EBAS at NILU, Part of DOI: <https://doi.org/10.48597/SH2B-UUKV>  
 Telling, S., EMEP, 2013, Inorganics in air and particle phase at Harwell, data hosted by EBAS at NILU, Part of DOI: <https://doi.org/10.48597/AWZH-349S>

Telling, S., EMEP, 2013, Inorganics in air and particle phase at Harwell, data hosted by EBAS at NILU, Part of DOI: <https://doi.org/10.48597/RC72-84U3>

Telling, S., EMEP, 2013, Pm10\_mass at Harwell, data hosted by EBAS at NILU, Part of DOI: <https://doi.org/10.48597/3V8A-NWQF>

Telling, S., EMEP, 2013, Pm25\_mass at Harwell, data hosted by EBAS at NILU, Part of DOI: <https://doi.org/10.48597/EE8D-EFP5>

Tunved, P., ACTRIS, EMEP, EUSAAR, GAW-WDCA, 2013, OC/EC at Aspvreten, data hosted by EBAS at NILU, Part of DOI: <https://doi.org/10.48597/T8X5-2789>

Tunved, P., ACTRIS, EMEP, GAW-WDCA, 2014, OC/EC at Aspvreten, data hosted by EBAS at NILU, Part of DOI: <https://doi.org/10.48597/KEJJ-3S34>, <https://doi.org/10.48597/325P-F7JH>

Tunved, P., ACTRIS, EMEP, GAW-WDCA, 2015, OC/EC at Aspvreten, data hosted by EBAS at NILU, Part of DOI: <https://doi.org/10.48597/2FWN-S9JX>

Uhse, K., EMEP, 2004, Pm10\_mass at Westerland, data hosted by EBAS at NILU, Part of DOI: <https://doi.org/10.48597/W88J-9RBV>

Uhse, K., EMEP, 2014, Pm10\_mass at Westerland, data hosted by EBAS at NILU, Part of DOI: <https://doi.org/10.48597/W88J-9RBV>

Ulla, M., EMEP, 2013, Inorganics in air and particle phase at Pallas (Matorova), data hosted by EBAS at NILU, Part of DOI: <https://doi.org/10.48597/SZEK-ZRY4>

Ulla, M., EMEP, 2013, Inorganics in air and particle phase at Pallas (Matorova), data hosted by EBAS at NILU, Part of DOI: <https://doi.org/10.48597/UEFN-45WG>, <https://doi.org/10.48597/NM3J-XX7R>

Ulla, M., EMEP, 2013, Inorganics in air and particle phase at Utö, data hosted by EBAS at NILU, Part of DOI: <https://doi.org/10.48597/AEDE-DCAJ>

Ulla, M., EMEP, 2013, Inorganics in air and particle phase at Utö, data hosted by EBAS at NILU, Part of DOI: <https://doi.org/10.48597/KFMD-MGR5>

Ulla, M., EMEP, 2013, Inorganics in air and particle phase at Virolahti II, data hosted by EBAS at NILU, Part of DOI: <https://doi.org/10.48597/MHT7-PUZC>

Ulla, M., EMEP, 2013, Inorganics in air and particle phase at Virolahti II, data hosted by EBAS at NILU, Part of DOI: <https://doi.org/10.48597/ZCF4-WCCR>

Urmäs, M., EMEP, 2015, Pm25\_mass at Lahemaa, data hosted by EBAS at NILU, Part of DOI: <https://doi.org/10.48597/8QWS-2E3J>

Urmäs, M., EMEP, 2015, Pm25\_mass at Vilsandi, data hosted by EBAS at NILU, Part of DOI: <https://doi.org/10.48597/CPH8-RB2X>

Urmäs, M., EMEP, 2016, Pm10\_mass at Lahemaa, data hosted by EBAS at NILU, Part of DOI: <https://doi.org/10.48597/HDY4-MK2X>

Urmäs, M., EMEP, 2016, Pm25\_mass at Lahemaa, data hosted by EBAS at NILU, Part of DOI: <https://doi.org/10.48597/8QWS-2E3J>

Urmäs, M., EMEP, 2016, Pm25\_mass at Vilsandi, data hosted by EBAS at NILU, Part of DOI: <https://doi.org/10.48597/CPH8-RB2X>

Urmäs, M., EMEP, 2017, Pm10\_mass at Lahemaa, data hosted by EBAS at NILU, Part of DOI: <https://doi.org/10.48597/HDY4-MK2X>

Urmäs, M., EMEP, 2017, Pm25\_mass at Lahemaa, data hosted by EBAS at NILU, Part of DOI: <https://doi.org/10.48597/8QWS-2E3J>

Urmäs, M., EMEP, 2017, Pm25\_mass at Vilsandi, data hosted by EBAS at NILU, Part of DOI: <https://doi.org/10.48597/CPH8-RB2X>

Urmäs, M., EMEP, 2018, Pm10\_mass at Lahemaa, data hosted by EBAS at NILU, Part of DOI: <https://doi.org/10.48597/HDY4-MK2X>

Urmäs, M., EMEP, 2018, Pm25\_mass at Lahemaa, data hosted by EBAS at NILU, Part of DOI: <https://doi.org/10.48597/8QWS-2E3J>

Urmäs, M., EMEP, 2018, Pm25\_mass at Vilsandi, data hosted by EBAS at NILU, Part of DOI: <https://doi.org/10.48597/CPH8-RB2X>

Urmäs, M., EMEP, 2019, Pm10\_mass at Lahemaa, data hosted by EBAS at NILU, Part of DOI: <https://doi.org/10.48597/HDY4-MK2X>

Urmäs, M., EMEP, 2019, Pm25\_mass at Lahemaa, data hosted by EBAS at NILU, Part of DOI: <https://doi.org/10.48597/8QWS-2E3J>

Urmäs, M., EMEP, 2019, Pm25\_mass at Vilsandi, data hosted by EBAS at NILU, Part of DOI: <https://doi.org/10.48597/CPH8-RB2X>

Urmas, M., EMEP, 2020, Pm10\_mass at Lahemaa, data hosted by EBAS at NILU, Part of DOI: <https://doi.org/10.48597/HDY4-MK2X>  
 Urmas, M., EMEP, 2020, Pm25\_mass at Lahemaa, data hosted by EBAS at NILU, Part of DOI: <https://doi.org/10.48597/8QWS-2E3J>  
 Urmas, M., EMEP, 2020, Pm25\_mass at Vilsandi, data hosted by EBAS at NILU, Part of DOI: <https://doi.org/10.48597/CPH8-RB2X>  
 Urmas, M., EMEP, 2021, Pm10\_mass at Lahemaa, data hosted by EBAS at NILU, Part of DOI: <https://doi.org/10.48597/HDY4-MK2X>  
 Urmas, M., EMEP, 2021, Pm25\_mass at Lahemaa, data hosted by EBAS at NILU, Part of DOI: <https://doi.org/10.48597/8QWS-2E3J>  
 Urmas, M., EMEP, 2021, Pm25\_mass at Vilsandi, data hosted by EBAS at NILU, Part of DOI: <https://doi.org/10.48597/CPH8-RB2X>  
 Urmas, M., EMEP, 2022, Pm10\_mass at Lahemaa, data hosted by EBAS at NILU, Part of DOI: <https://doi.org/10.48597/X8G4-3NMM>  
 Urmas, M., EMEP, 2022, Pm25\_mass at Lahemaa, data hosted by EBAS at NILU, Part of DOI: <https://doi.org/10.48597/8QWS-2E3J>  
 Urmas, M., EMEP, 2022, Pm25\_mass at Vilsandi, data hosted by EBAS at NILU, Part of DOI: <https://doi.org/10.48597/CPH8-RB2X>  
 Ursul, G., EMEP, 2011, Pm10\_mass at Poiana Stampei, data hosted by EBAS at NILU, Part of DOI: <https://doi.org/10.48597/VHD3-M3WB>  
 Vadset, M., NILU, 2016, Pm10\_mass at Karpdalen, data hosted by EBAS at NILU, Part of DOI: <https://doi.org/10.48597/JS44-FBEQ>  
 Vadset, M., NILU, 2016, Pm10\_mass at Karpdalen, data hosted by EBAS at NILU, Part of DOI: <https://doi.org/10.48597/QT6N-ZDZZ>  
 Vadset, M., NILU, 2016, Pm10\_mass at Svanvik, data hosted by EBAS at NILU, Part of DOI: <https://doi.org/10.48597/GSQR-6WDM>  
 Vadset, M., NILU, 2016, Pm10\_mass at Svanvik, data hosted by EBAS at NILU, Part of DOI: <https://doi.org/10.48597/HQB4-4QHM>  
 Vana, M., ACTRIS, EMEP, 2016, OC/EC at Kosetice (NAOK), data hosted by EBAS at NILU, Part of DOI: <https://doi.org/10.48597/NYWJ-RTNH>  
 Vana, M., ACTRIS, EMEP, EUSAAR, GAW-WDCA, 2013, OC/EC at Kosetice (NAOK), data hosted by EBAS at NILU, Part of DOI: <https://doi.org/10.48597/G8MB-TEU9>  
 Vana, M., ACTRIS, EMEP, GAW-WDCA, 2013, OC/EC at Kosetice (NAOK), data hosted by EBAS at NILU, Part of DOI: <https://doi.org/10.48597/WXTR-3V34>  
 Vana, M., ACTRIS, EMEP, GAW-WDCA, 2015, OC/EC at Kosetice (NAOK), data hosted by EBAS at NILU, Part of DOI: <https://doi.org/10.48597/KCZW-QP9Y>  
 Vana, M., ACTRIS, EMEP, GAW-WDCA, 2015, OC/EC at Kosetice (NAOK), data hosted by EBAS at NILU, Part of DOI: <https://doi.org/10.48597/WXTR-3V34>  
 Vana, M., CAMPAIGN, EMEP, 2007, Pm10\_mass at Kosetice (NAOK), data hosted by EBAS at NILU, Part of DOI: <https://doi.org/10.48597/G7V6-DHQP>  
 Vana, M., CAMPAIGN, EMEP, 2009, OC/EC at Svratouch, data hosted by EBAS at NILU, Part of DOI: <https://doi.org/10.48597/2RW7-7BDW>  
 Vana, M., CAMPAIGN, EMEP, 2012, Elemental\_carbon at Kosetice (NAOK), data hosted by EBAS at NILU, Part of DOI: <https://doi.org/10.48597/76T6-DVEZ>  
 Vana, M., EMEP, 2009, OC/EC at Kosetice (NAOK), data hosted by EBAS at NILU, Part of DOI: <https://doi.org/10.48597/4S7M-BX6C>  
 Vana, M., EMEP, 2009, Pm25\_mass at Kosetice (NAOK), data hosted by EBAS at NILU, Part of DOI: <https://doi.org/10.48597/V4HE-UJTU>  
 Vana, M., EMEP, 2010, Pm10\_mass at Kosetice (NAOK), data hosted by EBAS at NILU, Part of DOI: <https://doi.org/10.48597/URK8-3PMN>  
 Vana, M., EMEP, 2010, Pm25\_mass at Kosetice (NAOK), data hosted by EBAS at NILU, Part of DOI: <https://doi.org/10.48597/UVNU-SPVW>  
 Vana, M., EMEP, 2012, PM mass at Kosetice (NAOK), data hosted by EBAS at NILU, Part of DOI: <https://doi.org/10.48597/A48A-9M2E>  
 Vana, M., EMEP, 2012, Pm10\_mass at Kosetice (NAOK), data hosted by EBAS at NILU, Part of DOI: <https://doi.org/10.48597/8GUZ-GCQD>



Vana, M., EMEP, 2012, Pm10\_mass at Kosetice (NAOK), data hosted by EBAS at NILU, Part of DOI: <https://doi.org/10.48597/B6UD-BZND>

Vana, M., EMEP, 2012, Pm25\_mass at Kosetice (NAOK), data hosted by EBAS at NILU, Part of DOI: <https://doi.org/10.48597/UVNU-SPVW>

Vana, M., EMEP, 2013, PM mass at Kosetice (NAOK), data hosted by EBAS at NILU, Part of DOI: <https://doi.org/10.48597/A48A-9M2E>

Vana, M., EMEP, 2013, Pm10\_mass at Churanov, data hosted by EBAS at NILU, Part of DOI: <https://doi.org/10.48597/UMQ5-YZFT>

Vana, M., EMEP, 2013, Pm25\_mass at Kosetice (NAOK), data hosted by EBAS at NILU, Part of DOI: <https://doi.org/10.48597/UVNU-SPVW>

Vana, M., EMEP, 2014, Pm10\_mass at Churanov, data hosted by EBAS at NILU, Part of DOI: <https://doi.org/10.48597/UMQ5-YZFT>

Vana, M., EMEP, 2014, Pm25\_mass at Kosetice (NAOK), data hosted by EBAS at NILU, Part of DOI: <https://doi.org/10.48597/UVNU-SPVW>

Vana, M., EMEP, 2014, Sodium at Kosetice (NAOK), data hosted by EBAS at NILU, Part of DOI: <https://doi.org/10.48597/JM8T-3X3K>

Vana, M., EMEP, 2015, PM mass at Kosetice (NAOK), data hosted by EBAS at NILU, Part of DOI: <https://doi.org/10.48597/8GUZ-GCQD>, <https://doi.org/10.48597/VUJ6-E8CG>

Vana, M., EMEP, 2015, PM mass at Kosetice (NAOK), data hosted by EBAS at NILU, Part of DOI: <https://doi.org/10.48597/8GUZ-GCQD>, <https://doi.org/10.48597/WNRW-U8AQ>

Vana, M., EMEP, 2015, Pm10\_mass at Churanov, data hosted by EBAS at NILU, Part of DOI: <https://doi.org/10.48597/ESXV-RZ7U>

Vana, M., EMEP, 2015, Pm10\_mass at Churanov, data hosted by EBAS at NILU, Part of DOI: <https://doi.org/10.48597/UMQ5-YZFT>

Vana, M., EMEP, 2015, Pm10\_mass at Kosetice (NAOK), data hosted by EBAS at NILU, Part of DOI: <https://doi.org/10.48597/YN84-3QMU>

Vana, M., EMEP, 2015, Pm10\_mass at Svratouch, data hosted by EBAS at NILU, Part of DOI: <https://doi.org/10.48597/Q9VX-CU9W>

Vana, M., EMEP, 2015, Pm25\_mass at Kosetice (NAOK), data hosted by EBAS at NILU, Part of DOI: <https://doi.org/10.48597/F272-9444>

Vana, M., EMEP, 2015, Pm25\_mass at Kosetice (NAOK), data hosted by EBAS at NILU, Part of DOI: <https://doi.org/10.48597/NK8F-3FKK>

Vana, M., EMEP, 2015, Sodium at Kosetice (NAOK), data hosted by EBAS at NILU, Part of DOI: <https://doi.org/10.48597/758X-Y9PN>

Vana, M., EMEP, 2015, Sodium at Kosetice (NAOK), data hosted by EBAS at NILU, Part of DOI: <https://doi.org/10.48597/JM8T-3X3K>

Vana, M., EMEP, 2016, PM mass at Kosetice (NAOK), data hosted by EBAS at NILU, Part of DOI: <https://doi.org/10.48597/8GUZ-GCQD>, <https://doi.org/10.48597/WNRW-U8AQ>

Vana, M., EMEP, 2016, Pm10\_mass at Churanov, data hosted by EBAS at NILU, Part of DOI: <https://doi.org/10.48597/ESXV-RZ7U>

Vana, M., EMEP, 2016, Pm10\_mass at Kosetice (NAOK), data hosted by EBAS at NILU, Part of DOI: <https://doi.org/10.48597/YN84-3QMU>

Vana, M., EMEP, 2016, Pm10\_mass at Svratouch, data hosted by EBAS at NILU, Part of DOI: <https://doi.org/10.48597/Q9VX-CU9W>

Vana, M., EMEP, 2016, Pm25\_mass at Kosetice (NAOK), data hosted by EBAS at NILU, Part of DOI: <https://doi.org/10.48597/FY7T-QPU6>

Vana, M., EMEP, 2016, Sodium at Kosetice (NAOK), data hosted by EBAS at NILU, Part of DOI: <https://doi.org/10.48597/JM8T-3X3K>

Vana, M., EMEP, 2017, Pm10\_mass at Churanov, data hosted by EBAS at NILU, Part of DOI: <https://doi.org/10.48597/ESXV-RZ7U>

Vana, M., EMEP, 2017, Pm10\_mass at Kosetice (NAOK), data hosted by EBAS at NILU, Part of DOI: <https://doi.org/10.48597/YN84-3QMU>

Vana, M., EMEP, 2017, Pm10\_mass at Svratouch, data hosted by EBAS at NILU, Part of DOI: <https://doi.org/10.48597/Q9VX-CU9W>

Vana, M., EMEP, 2017, Pm25\_mass at Kosetice (NAOK), data hosted by EBAS at NILU, Part of DOI: <https://doi.org/10.48597/FY7T-QPU6>

Vana, M., EMEP, 2017, Sodium at Kosetice (NAOK), data hosted by EBAS at NILU, Part of DOI: <https://doi.org/10.48597/A6RN-UBA6>

Vana, M., EMEP, 2018, Pm10\_mass at Churanov, data hosted by EBAS at NILU, Part of DOI: <https://doi.org/10.48597/ESXV-RZ7U>

Vana, M., EMEP, 2018, Pm10\_mass at Kosetice (NAOK), data hosted by EBAS at NILU, Part of DOI: <https://doi.org/10.48597/YW5B-47DF>

Vana, M., EMEP, 2018, Pm25\_mass at Kosetice (NAOK), data hosted by EBAS at NILU, Part of DOI: <https://doi.org/10.48597/FY7T-QPU6>

Vana, M., EMEP, 2018, Sodium at Kosetice (NAOK), data hosted by EBAS at NILU, Part of DOI: <https://doi.org/10.48597/73KB-9DJH>

Vana, M., EMEP, 2019, Pm10\_mass at Churanov, data hosted by EBAS at NILU, Part of DOI: <https://doi.org/10.48597/ESXV-RZ7U>

Vana, M., EMEP, 2019, Pm10\_mass at Kosetice (NAOK), data hosted by EBAS at NILU, Part of DOI: <https://doi.org/10.48597/UDAA-HGWN>

Vana, M., EMEP, 2019, Pm10\_mass at Kosetice (NAOK), data hosted by EBAS at NILU, Part of DOI: <https://doi.org/10.48597/YW5B-47DF>

Vana, M., EMEP, 2019, Pm25\_mass at Kosetice (NAOK), data hosted by EBAS at NILU, Part of DOI: <https://doi.org/10.48597/AYCF-T2XC>

Vana, M., EMEP, 2019, Pm25\_mass at Kosetice (NAOK), data hosted by EBAS at NILU, Part of DOI: <https://doi.org/10.48597/FY7T-QPU6>

Vana, M., EMEP, 2019, Sodium at Kosetice (NAOK), data hosted by EBAS at NILU, Part of DOI: <https://doi.org/10.48597/A6RN-UBA6>

Vana, M., Silhavy, J., Cech, J., EMEP, 2018, Pm10\_mass at Kosetice (NAOK), data hosted by EBAS at NILU, Part of DOI: <https://doi.org/10.48597/UDAA-HGWN>

Vana, M., Silhavy, J., Cech, J., EMEP, 2018, Pm25\_mass at Kosetice (NAOK), data hosted by EBAS at NILU, Part of DOI: <https://doi.org/10.48597/AYCF-T2XC>

Varga, Z., EMEP, 2021, Pm25\_mass at K-puszt, data hosted by EBAS at NILU, Part of DOI: <https://doi.org/10.48597/QQJY-Q67A>

Vecchiocattivi, M., EMEP, 2019, OC/EC at Monte Martano, data hosted by EBAS at NILU, Part of DOI: <https://doi.org/10.48597/VU67-ZJ7K>

Vecchiocattivi, M., EMEP, 2020, OC/EC at Monte Martano, data hosted by EBAS at NILU, Part of DOI: <https://doi.org/10.48597/8TXX-SQYV>

Vecchiocattivi, M., EMEP, 2021, OC/EC at Monte Martano, data hosted by EBAS at NILU, Part of DOI: <https://doi.org/10.48597/8TXX-SQYV>

Vecchiocattivi, M., EMEP, 2022, Aluminium at Monte Martano, data hosted by EBAS at NILU, Part of DOI: <https://doi.org/10.48597/6C5X-PFHB>

Vecchiocattivi, M., EMEP, 2022, Inorganics in air and particle phase at Monte Martano, data hosted by EBAS at NILU, Part of DOI: <https://doi.org/10.48597/YYBP-SG46>

Vecchiocattivi, M., EMEP, 2022, OC/EC at Monte Martano, data hosted by EBAS at NILU, Part of DOI: <https://doi.org/10.48597/VU67-ZJ7K>

Vecchiocattivi, M., EMEP, 2022, Pm10\_mass at Monte Martano, data hosted by EBAS at NILU, Part of DOI: <https://doi.org/10.48597/QZG9-THDB>

Vecchiocattivi, M., EMEP, 2022, Pm25\_mass at Monte Martano, data hosted by EBAS at NILU, Part of DOI: <https://doi.org/10.48597/K8ZX-WENG>

Vecchiocattivi, M., EMEP, 2023, Aluminium at Monte Martano, data hosted by EBAS at NILU, Part of DOI: <https://doi.org/10.48597/NSDG-ZDUE>

Vecchiocattivi, M., EMEP, 2023, Sulphate corrected at Monte Martano, data hosted by EBAS at NILU, Part of DOI: <https://doi.org/10.48597/XBJW-CPMS>

Vecchiocattivi, M., EMEP, 2024, Inorganics in air and particle phase at Monte Martano, data hosted by EBAS at NILU, Part of DOI: <https://doi.org/10.48597/AWRQ-NW6Z>

Vecchiocattivi, M., EMEP, 2024, Inorganics in air and particle phase at Monte Martano, data hosted by EBAS at NILU, Part of DOI: <https://doi.org/10.48597/MJYV-ASNQ>

Vecchiocattivi, M., EMEP, 2024, Inorganics in air and particle phase at Monte Martano, data hosted by EBAS at NILU, Part of DOI: <https://doi.org/10.48597/N4VB-RUG5>

Vecchiocattivi, M., EMEP, 2024, OC/EC and aluminium at Monte Martano, data hosted by EBAS at NILU, Part of DOI: <https://doi.org/10.48597/YXXA-BW5C>, <https://doi.org/10.48597/NSDG-ZDUE>

Vecchiocattivi, M., EMEP, 2024, PM mass at Monte Martano, data hosted by EBAS at NILU, Part of DOI: <https://doi.org/10.48597/VAZP-FK7S>, <https://doi.org/10.48597/W5QC-4EVW>

Vincent, K., EMEP, 2011, PM mass at Harwell, data hosted by EBAS at NILU, Part of DOI: <https://doi.org/10.48597/MCBQ-KWJK>

Vincent, K., EMEP, 2011, Pm10\_mass at Harwell, data hosted by EBAS at NILU, Part of DOI: <https://doi.org/10.48597/QQKZ-A9TW>

Vincent, K., EMEP, 2011, Pm10\_mass at Lough Navar, data hosted by EBAS at NILU, Part of DOI: <https://doi.org/10.48597/W7E3-9K9Y>

Vincent, K., EMEP, 2011, Pm10\_mass at Narberth, data hosted by EBAS at NILU, Part of DOI: <https://doi.org/10.48597/KMYJ-KEAS>

Vincent, K., EMEP, 2011, Pm25\_mass at Harwell, data hosted by EBAS at NILU, Part of DOI: <https://doi.org/10.48597/EUKJ-T9DR>

Vincent, K., EMEP, 2013, PM mass at Auchencorth Moss, data hosted by EBAS at NILU, Part of DOI: <https://doi.org/10.48597/4SDR-74Z5>

Vincent, K., EMEP, 2013, PM mass at Harwell, data hosted by EBAS at NILU, Part of DOI: <https://doi.org/10.48597/4DU3-65BS>

Vincent, K., EMEP, 2014, PM mass at Auchencorth Moss, data hosted by EBAS at NILU, Part of DOI: <https://doi.org/10.48597/6FDK-GNRE>

Vincent, K., EMEP, 2014, PM mass at Harwell, data hosted by EBAS at NILU, Part of DOI: <https://doi.org/10.48597/MP3N-P3X3>

Vincent, K., EMEP, 2014, Pm10\_mass at Lough Navar, data hosted by EBAS at NILU, Part of DOI: <https://doi.org/10.48597/WP4M-9W9Q>

Vincent, K., EMEP, 2014, Pm10\_mass at Narberth, data hosted by EBAS at NILU, Part of DOI: <https://doi.org/10.48597/G37K-SB98>

Vincent, K., EMEP, 2014, Pm25\_mass at Auchencorth Moss, data hosted by EBAS at NILU, Part of DOI: <https://doi.org/10.48597/8FF6-7BX8>

Vincent, K., EMEP, 2014, Pm25\_mass at Harwell, data hosted by EBAS at NILU, Part of DOI: <https://doi.org/10.48597/JPZD-EV8M>

Vincent, K., EMEP, 2015, PM mass at Harwell, data hosted by EBAS at NILU, Part of DOI: <https://doi.org/10.48597/5XWE-N7CA>, <https://doi.org/10.48597/JPZD-EV8M>

Vincent, K., EMEP, 2015, Pm10\_mass at Lough Navar, data hosted by EBAS at NILU, Part of DOI: <https://doi.org/10.48597/WP4M-9W9Q>

Vincent, K., EMEP, 2015, Pm10\_mass at Narberth, data hosted by EBAS at NILU, Part of DOI: <https://doi.org/10.48597/G37K-SB98>

Wallasch, M., CAMP, EMEP, 2001, Pm10\_mass at Westerland, data hosted by EBAS at NILU, Part of DOI: <https://doi.org/10.48597/P2UT-CT8N>

Wallasch, M., EMEP, 2001, Pm10\_mass at Deuselbach, data hosted by EBAS at NILU, Part of DOI: <https://doi.org/10.48597/YW74-KPKY>

Wallasch, M., EMEP, 2001, Pm10\_mass at Neuglobsow, data hosted by EBAS at NILU, Part of DOI: <https://doi.org/10.48597/XE8S-DWEV>

Wallasch, M., EMEP, 2001, Pm10\_mass at Zingst, data hosted by EBAS at NILU, Part of DOI: <https://doi.org/10.48597/3MKM-PR94>

Young, M., CAMPAIGN, EMEP, 2004, OC/EC and pm10\_mass at Mace Head, data hosted by EBAS at NILU, Part of DOI: <https://doi.org/10.48597/WJ8Z-AYRB>

Yttri, K., ACTRIS, EMEP, GAW-WDCA, 2023, OC/EC at Birkenes II, data hosted by EBAS at NILU, Part of DOI: <https://doi.org/10.48597/52NT-4DW3>, <https://doi.org/10.48597/TMJ4-BBJX>

Yttri, K., ACTRIS, EMEP, GAW-WDCA, 2023, OC/EC at Birkenes II, data hosted by EBAS at NILU, Part of DOI: <https://doi.org/10.48597/KMRF-476Y>

Yttri, K., ACTRIS, EMEP, GAW-WDCA, 2023, OC/EC at Birkenes II, data hosted by EBAS at NILU, Part of DOI: <https://doi.org/10.48597/T9VK-66GX>

Yttri, K., ACTRIS, EMEP, GAW-WDCA, 2023, OC/EC at Hurdal, data hosted by EBAS at NILU, Part of DOI: <https://doi.org/10.48597/RE9K-T6TQ>

Yttri, K., ACTRIS, EMEP, GAW-WDCA, 2023, OC/EC at Hurdal, data hosted by EBAS at NILU, Part of DOI: <https://doi.org/10.48597/RQ8R-F2M4>

Yttri, K., ACTRIS, EMEP, GAW-WDCA, 2023, OC/EC at Hurdal, data hosted by EBAS at NILU, Part of DOI: <https://doi.org/10.48597/XPBF-T5DU>, <https://doi.org/10.48597/MFNY-93WG>

Yttri, K., ACTRIS, EMEP, GAW-WDCA, 2023, OC/EC at Kårvatn, data hosted by EBAS at NILU, Part of DOI: <https://doi.org/10.48597/5QBW-XQSR>

Yttri, K., ACTRIS, EMEP, GAW-WDCA, 2023, OC/EC at Kårvatn, data hosted by EBAS at NILU, Part of DOI: <https://doi.org/10.48597/8PGB-KNHC>, <https://doi.org/10.48597/R66U-CPEB>

Yttri, K., ACTRIS, EMEP, GAW-WDCA, 2023, OC/EC at Kårvatn, data hosted by EBAS at NILU, Part of DOI: <https://doi.org/10.48597/YA4M-EGGR>

Yttri, K., ACTRIS, EMEP, GAW-WDCA, 2023, OC/EC at Zeppelin mountain (Ny-Ålesund), data hosted by EBAS at NILU, Part of DOI: <https://doi.org/10.48597/9WYQ-6KVF>

Yttri, K., ACTRIS, EMEP, GAW-WDCA, 2023, OC/EC at Zeppelin mountain (Ny-Ålesund), data hosted by EBAS at NILU, Part of DOI: <https://doi.org/10.48597/T8EZ-STE5>

Yttri, K., ACTRIS, EMEP, GAW-WDCA, NILU, 2014, OC/EC at Birkenes II, data hosted by EBAS at NILU, Part of DOI: <https://doi.org/10.48597/7NE5-3T23>

Yttri, K., ACTRIS, EMEP, GAW-WDCA, NILU, 2014, OC/EC at Birkenes II, data hosted by EBAS at NILU, Part of DOI: <https://doi.org/10.48597/X64M-5JMC>

Yttri, K., ACTRIS, EMEP, GAW-WDCA, NILU, 2023, OC/EC at Birkenes II, data hosted by EBAS at NILU, Part of DOI: <https://doi.org/10.48597/P85A-35N3>, <https://doi.org/10.48597/5958-KTBN>

Yttri, K., ACTRIS, EMEP, GAW-WDCA, NILU, 2023, OC/EC at Birkenes II, data hosted by EBAS at NILU, Part of DOI: <https://doi.org/10.48597/PDPZ-Q5KT>

Yttri, K., ACTRIS, EMEP, GAW-WDCA, NILU, 2023, OC/EC at Birkenes II, data hosted by EBAS at NILU, Part of DOI: <https://doi.org/10.48597/RWDW-S8TE>

Yttri, K., ACTRIS, EMEP, GAW-WDCA, NILU, 2023, OC/EC at Birkenes II, data hosted by EBAS at NILU, Part of DOI: <https://doi.org/10.48597/T893-4S65>, <https://doi.org/10.48597/7N3T-9M6G>

Yttri, K., ACTRIS, EMEP, GAW-WDCA, NILU, 2023, OC/EC at Hurdal, data hosted by EBAS at NILU, Part of DOI: <https://doi.org/10.48597/73SW-UXUY>

Yttri, K., ACTRIS, EMEP, GAW-WDCA, NILU, 2023, OC/EC at Hurdal, data hosted by EBAS at NILU, Part of DOI: <https://doi.org/10.48597/7VVU-NGWT>

Yttri, K., ACTRIS, EMEP, GAW-WDCA, NILU, 2023, OC/EC at Hurdal, data hosted by EBAS at NILU, Part of DOI: <https://doi.org/10.48597/FAXJ-9W3J>

Yttri, K., ACTRIS, EMEP, GAW-WDCA, NILU, 2023, OC/EC at Hurdal, data hosted by EBAS at NILU, Part of DOI: <https://doi.org/10.48597/H6F6-4GX2>, <https://doi.org/10.48597/76VZ-5UZZ>

Yttri, K., ACTRIS, EMEP, GAW-WDCA, NILU, 2023, OC/EC at Kårvatn, data hosted by EBAS at NILU, Part of DOI: <https://doi.org/10.48597/EAUS-9QWC>

Yttri, K., ACTRIS, EMEP, GAW-WDCA, NILU, 2023, OC/EC at Kårvatn, data hosted by EBAS at NILU, Part of DOI: <https://doi.org/10.48597/FHM4-2C3P>

Yttri, K., ACTRIS, EMEP, NILU, 2011, Organic\_carbon at Birkenes II, data hosted by EBAS at NILU, Part of DOI: <https://doi.org/10.48597/EU7B-X7Y7>

Yttri, K., ACTRIS, EMEP, NILU, 2012, OC/EC at Birkenes II, data hosted by EBAS at NILU, Part of DOI: <https://doi.org/10.48597/WBSY-EXV9>

Yttri, K., ACTRIS, EMEP, NILU, 2012, OC/EC at Birkenes II, data hosted by EBAS at NILU, Part of DOI: <https://doi.org/10.48597/Z5QF-RV2F>

Yttri, K., ACTRIS, EMEP, NILU, 2014, Organic\_carbon at Birkenes II, data hosted by EBAS at NILU, Part of DOI: <https://doi.org/10.48597/EU7B-X7Y7>

Yttri, K., ACTRIS, EMEP, NILU, 2023, OC/EC at Hurdal, data hosted by EBAS at NILU, Part of DOI: <https://doi.org/10.48597/H6F6-4GX2>, <https://doi.org/10.48597/76VZ-5UZZ>

Yttri, K., ACTRIS, EMEP, NILU, 2023, OC/EC at Hurdal, data hosted by EBAS at NILU, Part of DOI: <https://doi.org/10.48597/P9Z6-WRAY>, <https://doi.org/10.48597/YPPT-4TX6>

Yttri, K., ACTRIS, EMEP, NILU, 2023, OC/EC at Kårvatn, data hosted by EBAS at NILU, Part of DOI: <https://doi.org/10.48597/EAUS-9QWC>

Yttri, K., ACTRIS, EMEP, NILU, 2023, OC/EC at Kårvatn, data hosted by EBAS at NILU, Part of DOI: <https://doi.org/10.48597/MRK9-SFZX>, <https://doi.org/10.48597/5KKZ-DCK4>

Yttri, K., ACTRIS, EMEP, NILU, 2023, OC/EC at Kårvatn, data hosted by EBAS at NILU, Part of DOI: <https://doi.org/10.48597/YQYZ-JZFP>, <https://doi.org/10.48597/UXQ7-9YWM>

Yttri, K., Aas, W., EMEP, GAW-WDCA, 2016, OC/EC at Leova II, data hosted by EBAS at NILU, Part of DOI: <https://doi.org/10.48597/M7UM-T4CX>

Yttri, K., CAMPAIGN, EMEP, NILU, 2009, OC/EC at Birkenes, data hosted by EBAS at NILU, Part of DOI: <https://doi.org/10.48597/4ZZA-9PJE>

Yttri, K., CREATE, EMEP, GAW-WDCA, NILU, 2010, OC/EC at Birkenes, data hosted by EBAS at NILU, Part of DOI: <https://doi.org/10.48597/DP9X-WQPT>

Yttri, K., CREATE, EMEP, GAW-WDCA, NILU, 2010, OC/EC at Birkenes, data hosted by EBAS at NILU, Part of DOI: <https://doi.org/10.48597/QC2T-UT7A>

Yttri, K., EMEP, EUSAAR, GAW-WDCA, NILU, 2010, OC/EC at Birkenes, data hosted by EBAS at NILU, Part of DOI: <https://doi.org/10.48597/9DKT-K7SY>

Yttri, K., EMEP, EUSAAR, GAW-WDCA, NILU, 2010, OC/EC at Birkenes, data hosted by EBAS at NILU, Part of DOI: <https://doi.org/10.48597/DP9X-WQPT>

Yttri, K., EMEP, EUSAAR, GAW-WDCA, NILU, 2010, Organic\_carbon at Birkenes, data hosted by EBAS at NILU, Part of DOI: <https://doi.org/10.48597/GXM6-6CRY>

Yttri, K., EMEP, GAW-WDCA, NILU, 2023, Pm10\_mass at Birkenes II, data hosted by EBAS at NILU, Part of DOI: <https://doi.org/10.48597/JJMZ-UABF>

Yttri, K., EMEP, NILU, 2010, OC/EC at Birkenes, data hosted by EBAS at NILU, Part of DOI: <https://doi.org/10.48597/DP9X-WQPT>

Yttri, K., EMEP, NILU, 2010, OC/EC at Birkenes, data hosted by EBAS at NILU, Part of DOI: <https://doi.org/10.48597/QC2T-UT7A>

Yttri, K., EMEP, NILU, 2013, OC/EC at Kårvatn, data hosted by EBAS at NILU, Part of DOI: <https://doi.org/10.48597/B2EC-JPDG>

Yttri, K., EMEP, NILU, 2014, OC/EC at Hurdal, data hosted by EBAS at NILU, Part of DOI: <https://doi.org/10.48597/PB7G-QPD2>

Yttri, K., EMEP, NILU, 2014, OC/EC at Kårvatn, data hosted by EBAS at NILU, Part of DOI: <https://doi.org/10.48597/HJT7-CQBY>

Yttri, K., EMEP, NILU, 2023, PM mass at Birkenes II, data hosted by EBAS at NILU, Part of DOI: <https://doi.org/10.48597/PPSZ-C9Y7>

Yttri, K., EMEP, NILU, 2023, PM mass at Hurdal, data hosted by EBAS at NILU, Part of DOI: <https://doi.org/10.48597/HKDP-BBXH>

Yttri, K., EMEP, NILU, 2023, PM mass at Kårvatn, data hosted by EBAS at NILU, Part of DOI: <https://doi.org/10.48597/HTVP-5GFG>

Yttri, K., EMEP, NILU, 2023, Pm10\_mass at Hurdal, data hosted by EBAS at NILU, Part of DOI: <https://doi.org/10.48597/J5VG-9V8Y>

Yttri, K., EMEP, NILU, 2023, Pm10\_mass at Kårvatn, data hosted by EBAS at NILU, Part of DOI: <https://doi.org/10.48597/HU2F-VE6B>

Yttri, K., EMEP, NILU, 2023, Pm25\_mass at Birkenes II, data hosted by EBAS at NILU, Part of DOI: <https://doi.org/10.48597/V823-X8MM>

Yttri, K., EMEP, NILU, 2023, Pm25\_mass at Hurdal, data hosted by EBAS at NILU, Part of DOI: <https://doi.org/10.48597/VAHV-HD27>

Yttri, K., EMEP, NILU, 2023, Pm25\_mass at Kårvatn, data hosted by EBAS at NILU, Part of DOI: <https://doi.org/10.48597/F8XS-WZNJ>
