# Supplementary material for: AERO-MAP: a data compilation and modeling approach to understand spatial variability in fine- and coarse-mode aerosol composition
Source: Copernicus journal article supplement (doi:10.5194/acp-25-4665-2025), 2025-05-06
Supplement: Supplementary file 3 [file acp-25-4665-2025-supplement.zip]

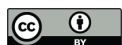

## *Supplement of*

# **AERO-MAP: a data compilation and modeling approach to understand spatial variability in fine- and coarse-mode aerosol composition**

**Natalie M. Mahowald et al.**

*Correspondence to:* Natalie M. Mahowald (mahowald@cornell.edu)

- acp-25-4665-2025-supplement-title-page.pdf
- \_\_MACOSX
  - supplement
    - \* .\_DS\_Store
    - \* .\_Supplementaldataset1.AEROMAP.dec20.2024.csv
    - \* .\_bibliography.supplement.may13.2024.pdf
    - \* .\_supplement.jan22.2025.acceptchanges.pdf
- supplement
  - .DS\_Store
  - Supplementaldataset1.AEROMAP.dec20.2024.csv
  - bibliography.supplement.may13.2024.pdf
  - supplement.jan22.2025.acceptchanges.pdf

The copyright of individual parts of the supplement might differ from the article licence.
