# Supplementary material for: AERO-MAP: a data compilation and modeling approach to understand spatial variability in fine- and coarse-mode aerosol composition
Source: Copernicus journal article supplement (doi:10.5194/acp-25-4665-2025), 2025-05-06
Supplement: Supplementary file 4 [file acp-25-4665-2025-supplement.zip]

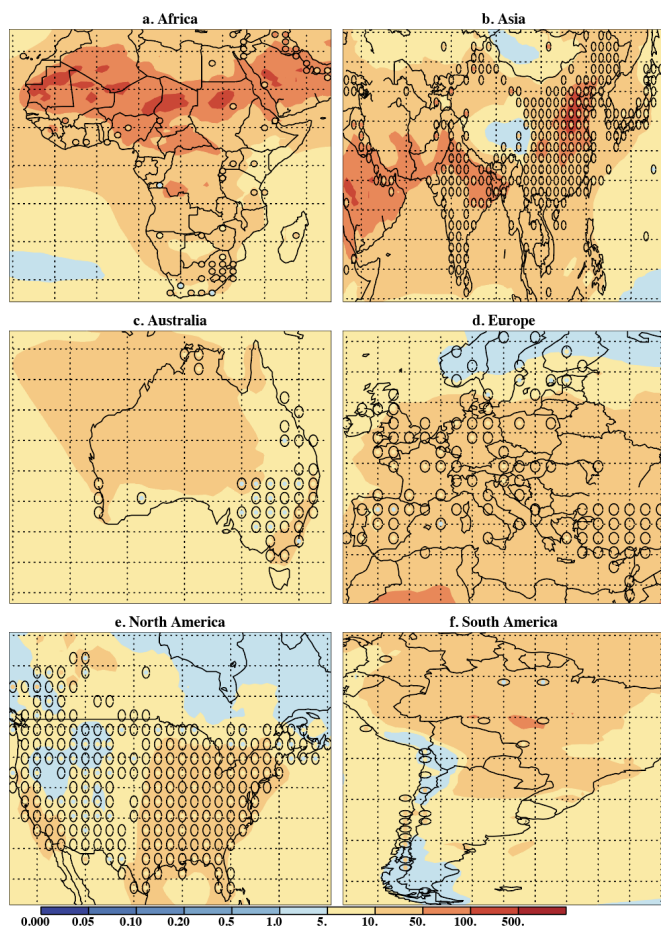

Figure S1: Modeled (background) and observed (circles) PM<sub>2.5</sub> annual mean concentrations in µg/m<sup>3</sup> for a. Africa, b. Asia, c. Australia, d. Europe, e. N. America and f. S. America. These show the exact same information as in Figure 3a but in subregions.

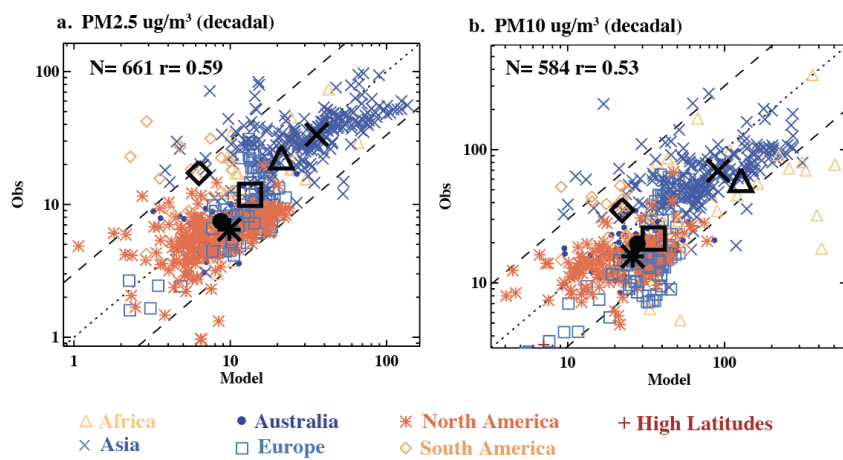

Figure S2: Scatterplots showing the model-data comparison of PM2.5 (a) and PM10 (b) using the decadal 2010-2019 averages instead of the climatological averages of the observations (otherwise the same as Figure 3d and 6c).

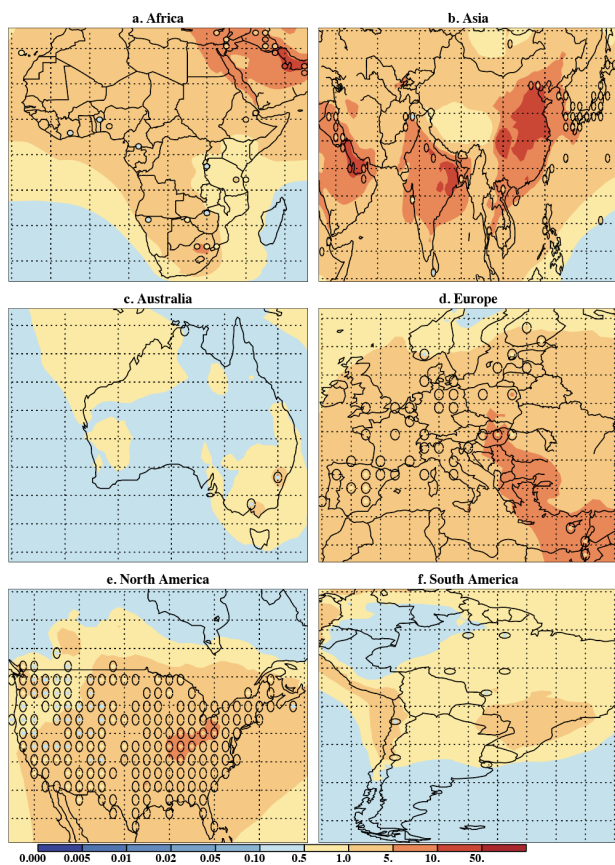

Figure S3: Modeled (background) and observed (circles)  $\text{SO}_4 \text{PM}_{2.5}$  annual mean concentrations in  $\mu\text{g}/\text{m}^3$  for a. Africa, b. Asia, c. Australia, d. Europe, e. N. America and f. S. America. These show the exact same information as in Figure 5a but in subregions.

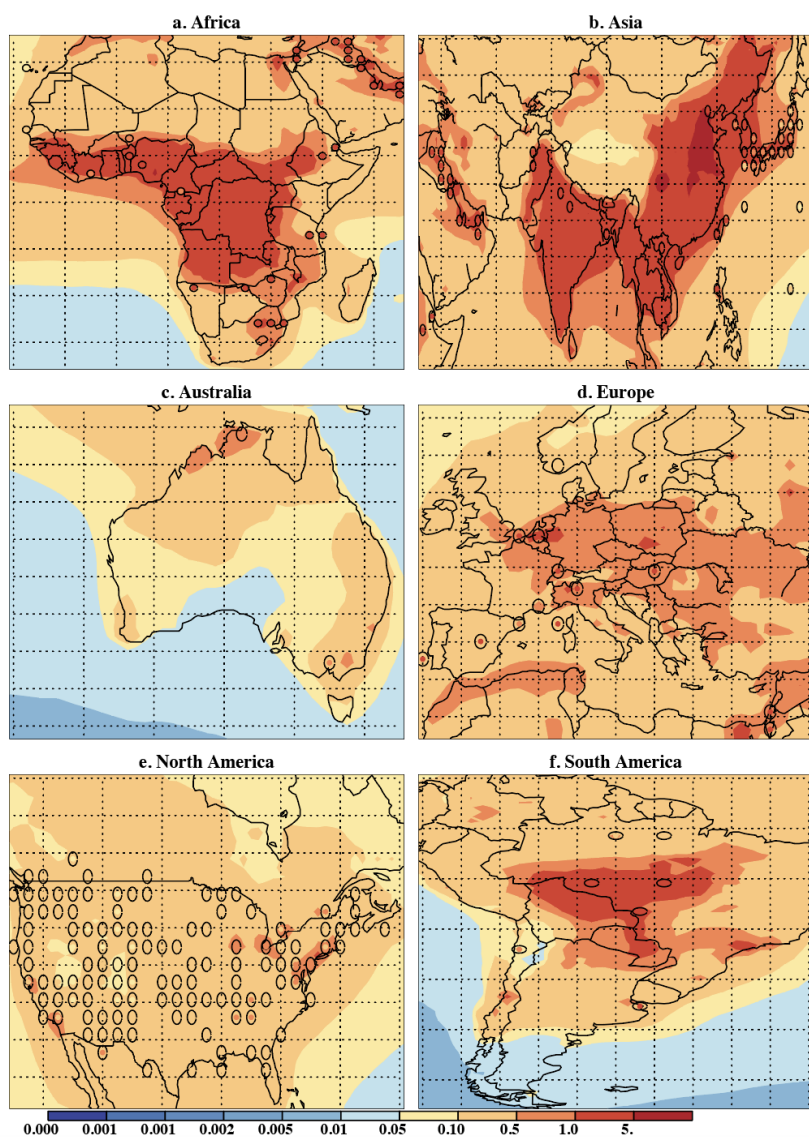

Figure S4: Modeled (background) and observed (circles) BC PM<sub>2.5</sub> annual mean concentrations in µg/m³ for a. Africa, b. Asia, c. Australia, d. Europe, e. N. America and f. S. America. These show the exact same information as in Figure 5c but in subregions.

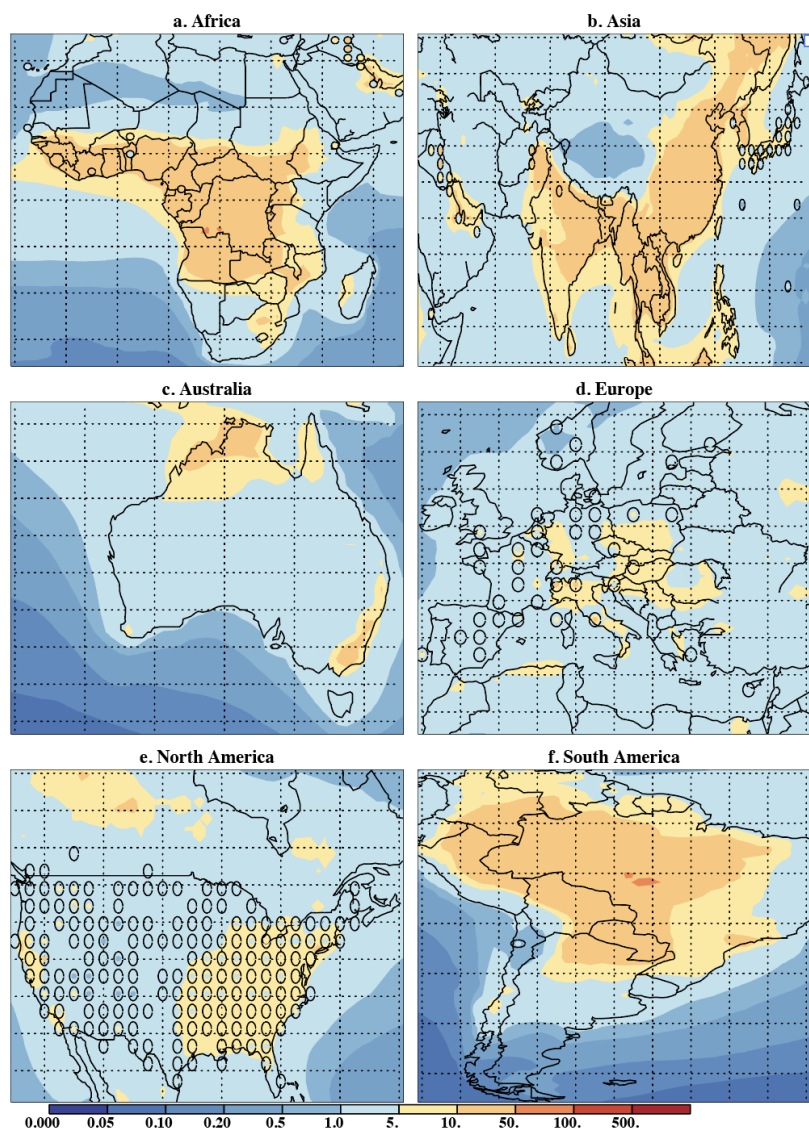

Figure S5: Modeled (background) and observed (circles) OM PM<sub>2.5</sub> annual mean concentrations in  $\mu\text{g}/\text{m}^3$  for a. Africa, b. Asia, c. Australia, d. Europe, e. N. America and f. S. America. These show the exact same information as in Figure 5e but in subregions.

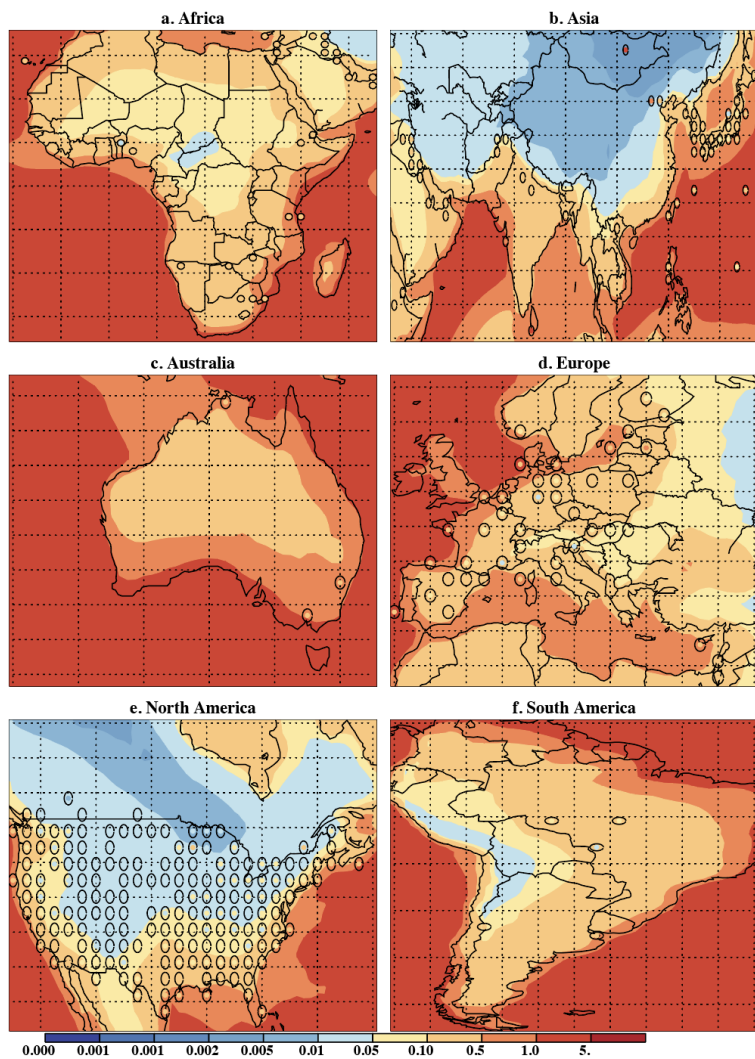

Figure S6: Modeled (background) and observed (circles) Na PM<sub>2.5</sub> annual mean concentrations in µg/m³ for a. Africa, b. Asia, c. Australia, d. Europe, e. N. America and f. S. America These show the exact same information as in Figure 5g but in subregions.



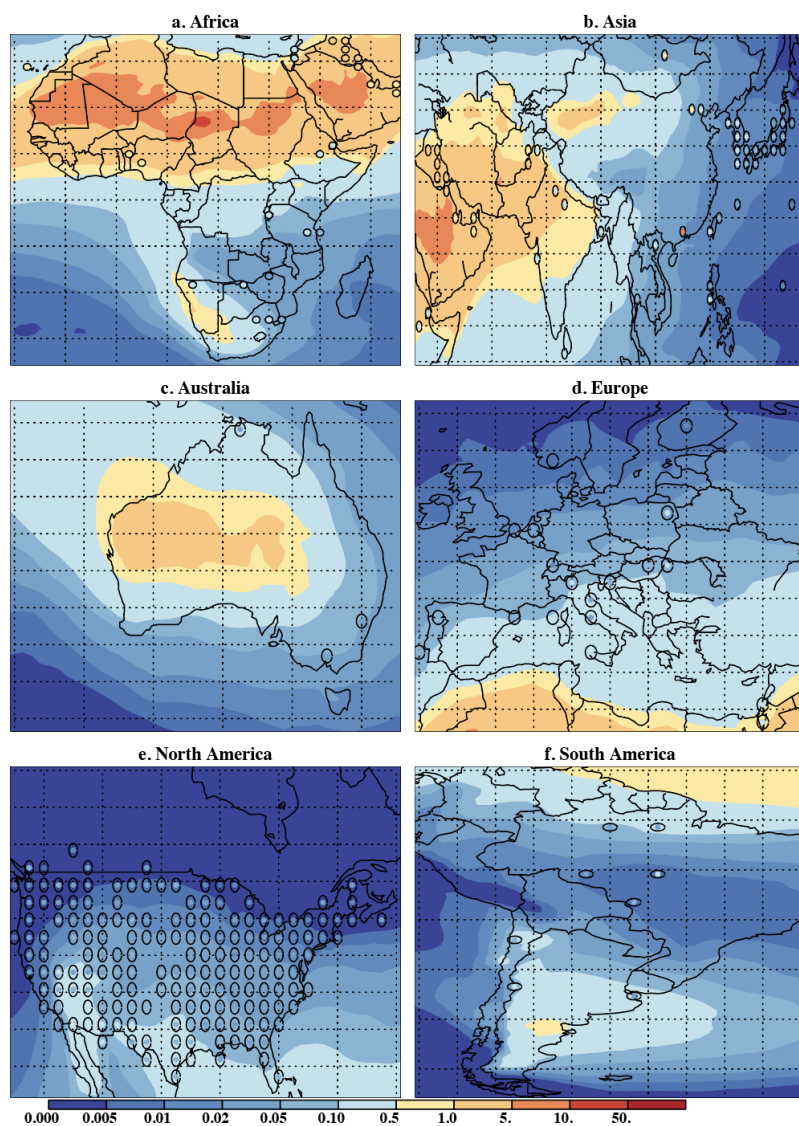

Figure S7: Modeled (background) and observed (circles) Al PM<sub>2.5</sub> annual mean concentrations in µg/m³ for a. Africa, b. Asia, c. Australia, d. Europe, e. N. America and f. S. America. These show the exact same information as in Figure 5i but in subregions.

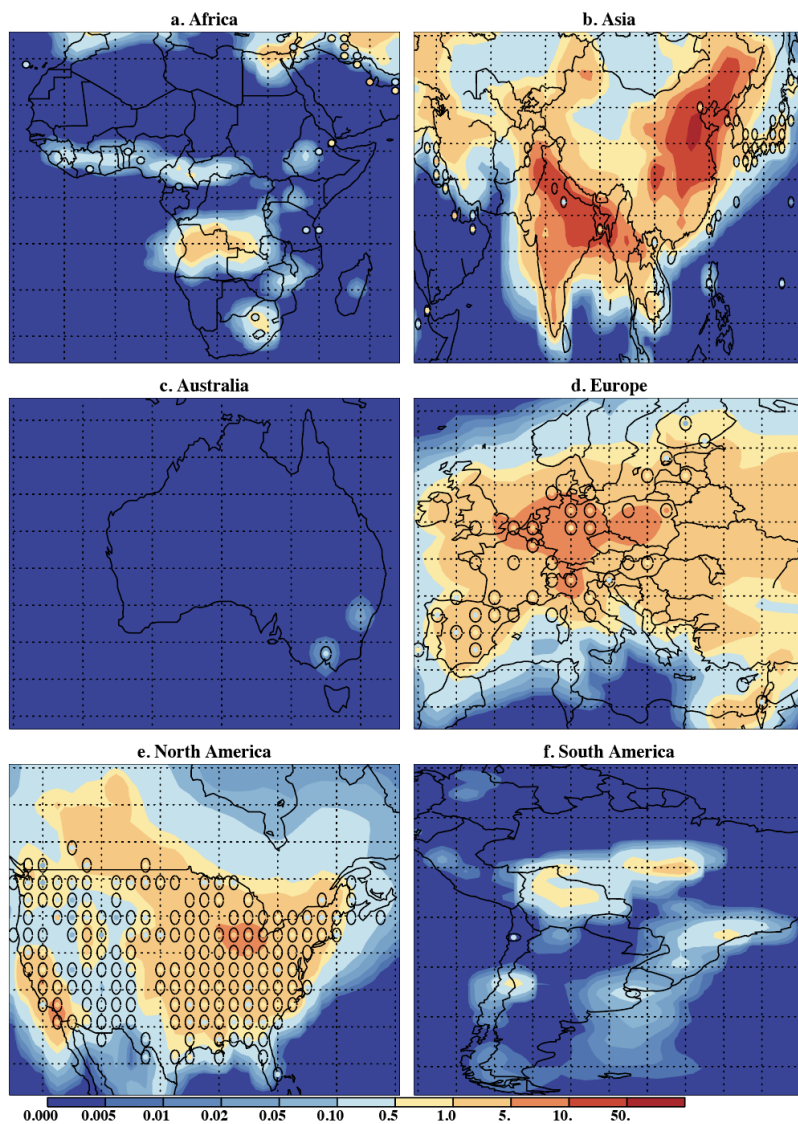

Figure S8: Modeled (background) and observed (circles)  $\text{NO}_3 \text{PM}_{2.5}$  annual mean concentrations in  $\mu\text{g}/\text{m}^3$  for a. Africa, b. Asia, c. Australia, d. Europe, e. N. America and f. S. America. These show the exact same information as in Figure 5k but in subregions.



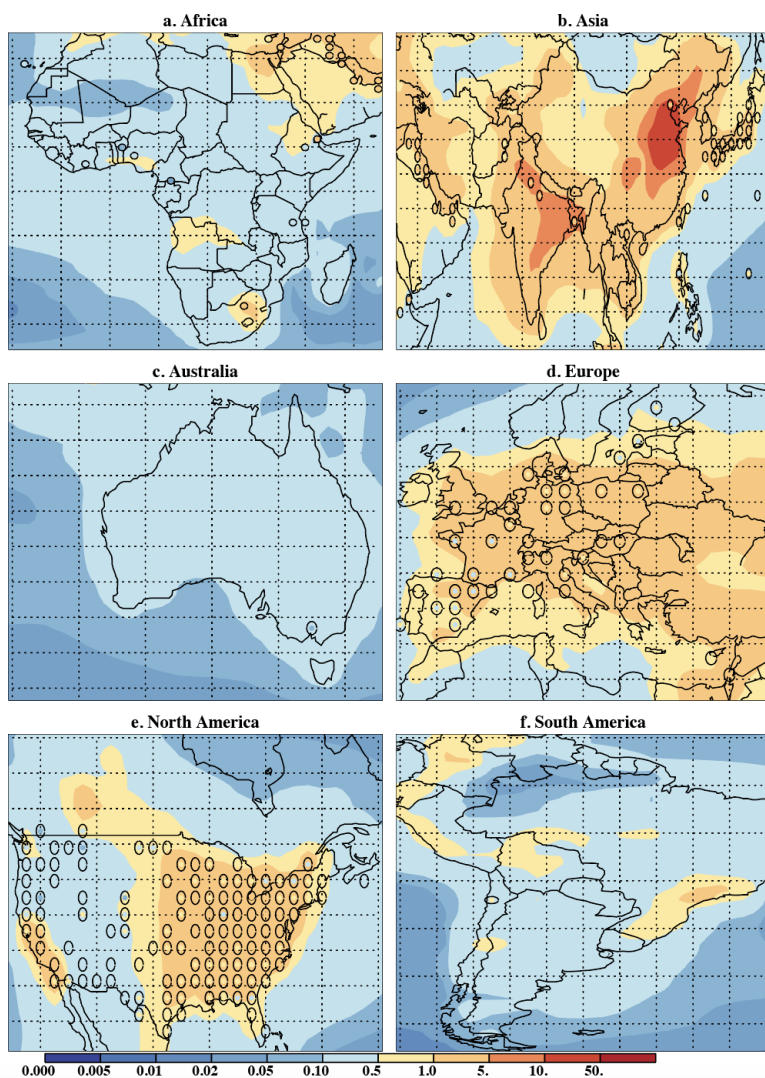

Figure S9: Modeled (background) and observed (circles)  $\text{NH}_4 \text{PM}_{2.5}$  annual mean concentrations in  $\mu\text{g}/\text{m}^3$  for a. Africa, b. Asia, c. Australia, d. Europe, e. N. America and f. S. America These show the exact same information as in Figure 51 but in subregions.

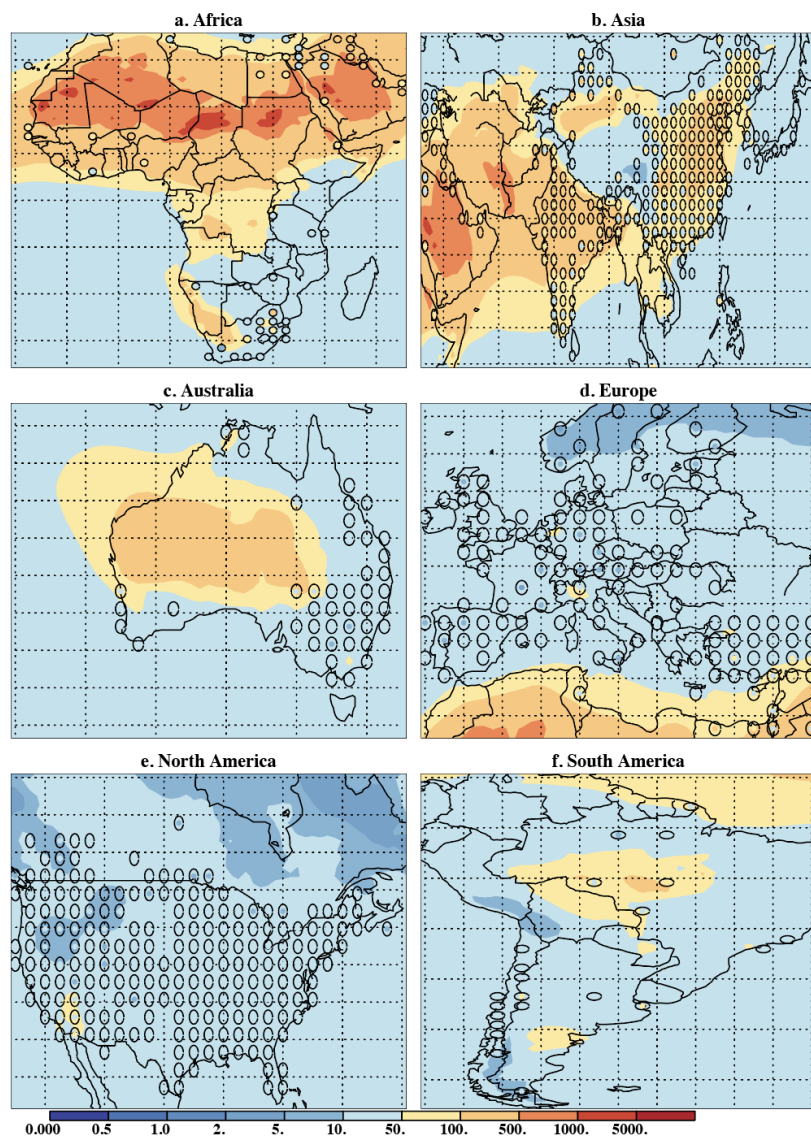

Figure S10: Modeled (background) and observed (circles) PM<sub>10</sub> annual mean concentrations in  $\mu\text{g}/\text{m}^3$  for a. Africa, b. Asia, c. Australia, d. Europe, e. N. America and f. S. America. These show the exact same information as in Figure 6a but in subregions.

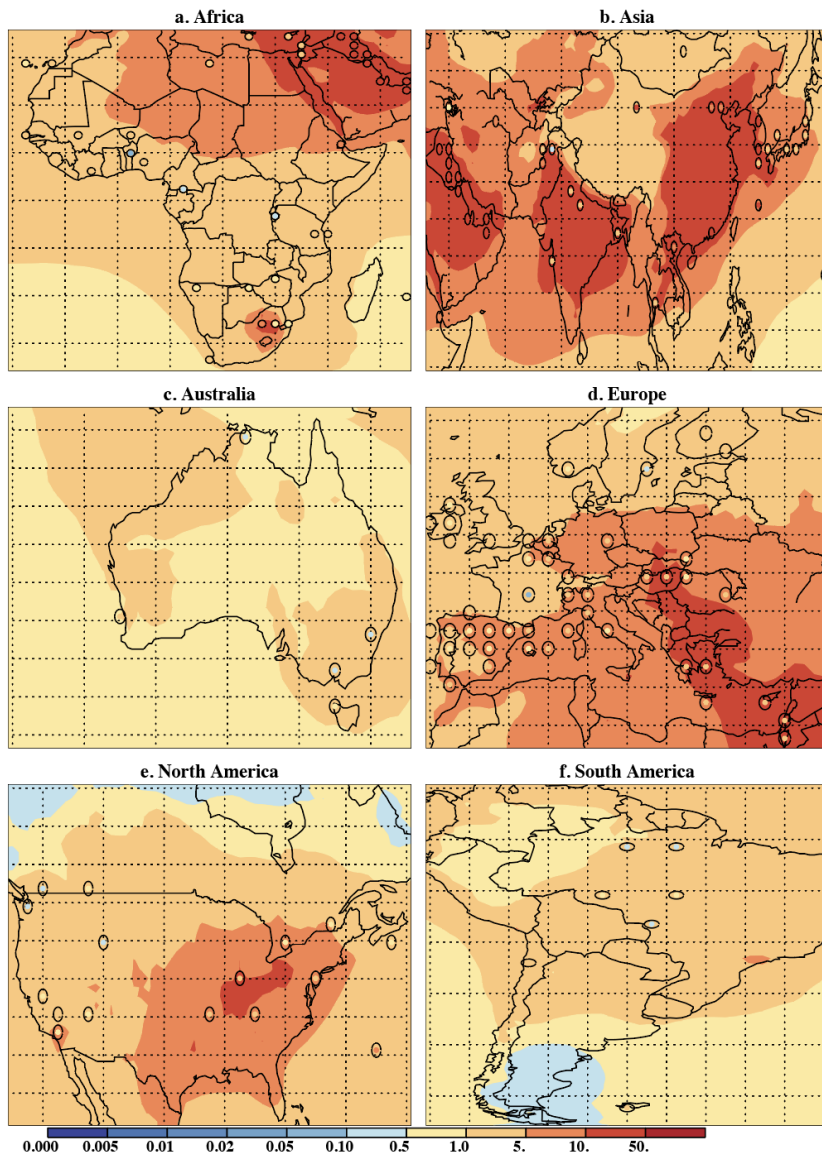

Figure S11: Modeled (background) and observed (circles)  $\text{SO}_4 \text{PM}_{10}$  annual mean concentrations in  $\mu\text{g}/\text{m}^3$  for a. Africa, b. Asia, c. Australia, d. Europe, e. N. America and f. S. America. These show the exact same information as in Figure 6a but in subregions.

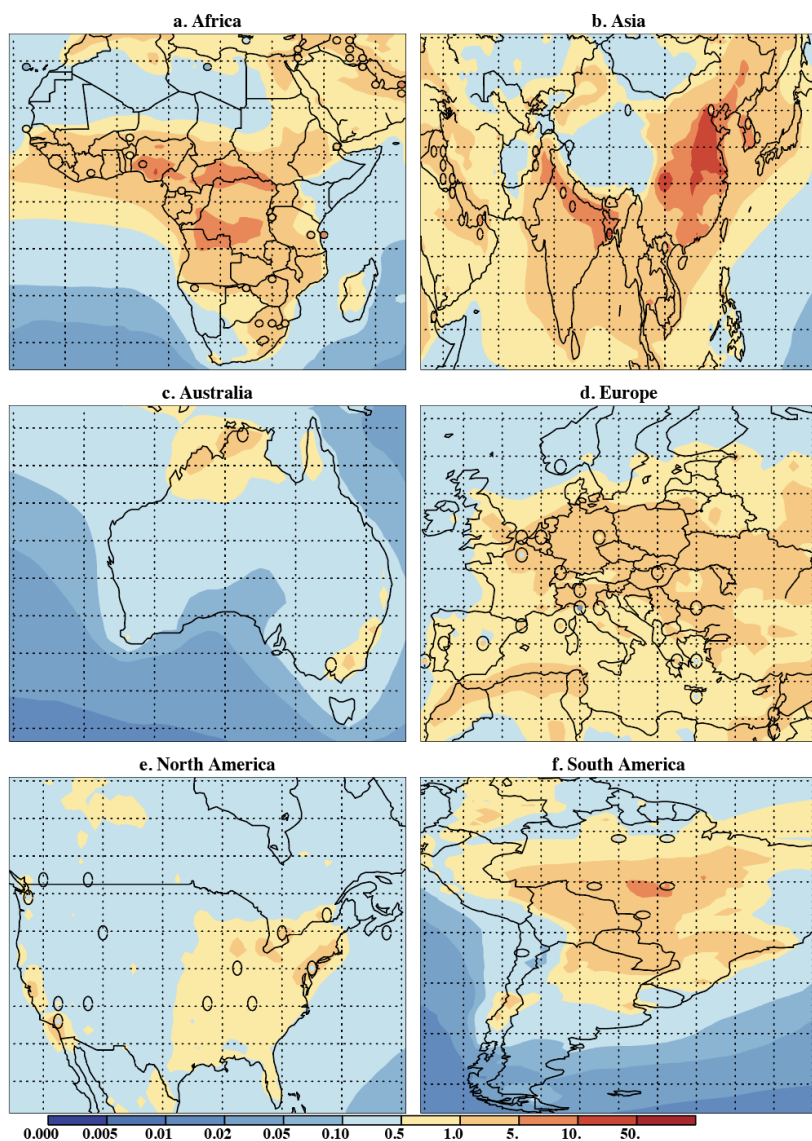

Figure S12: Modeled (background) and observed (circles) BC PM<sub>10</sub> annual mean concentrations in µg/m³ for a. Africa, b. Asia, c. Australia, d. Europe, e. N. America and f. S. America These show the exact same information as in Figure 6c but in subregions.

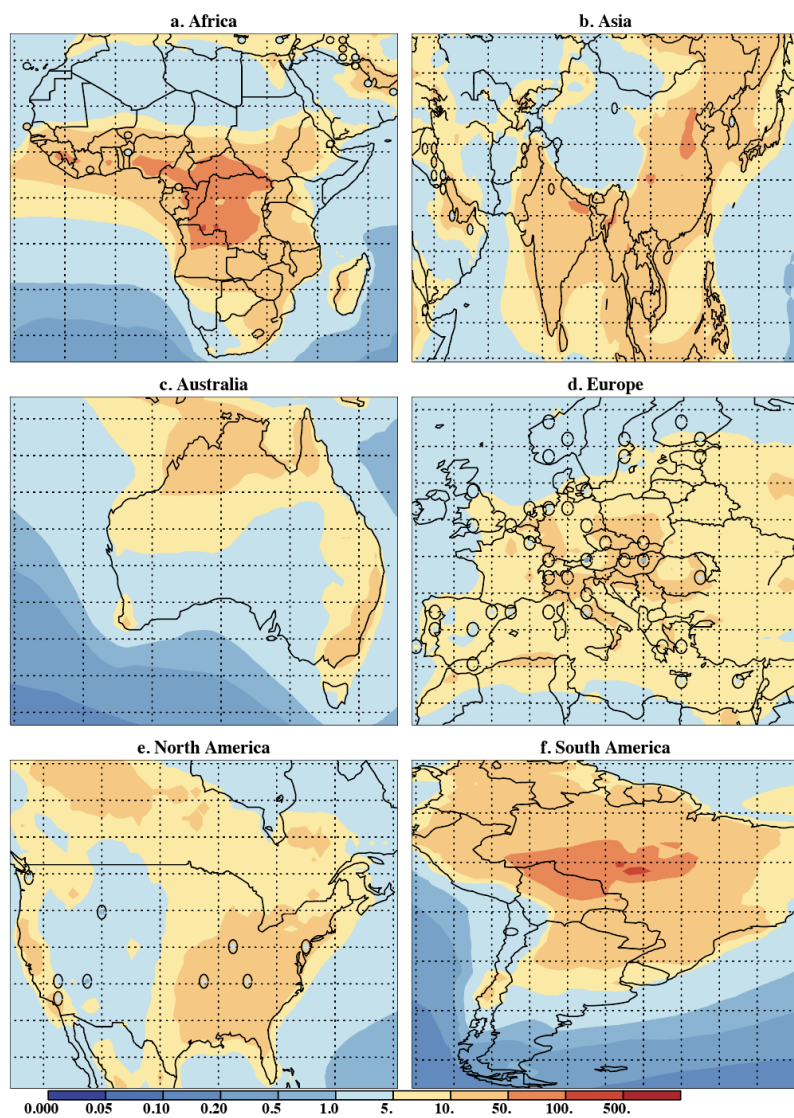

Figure S13: Modeled (background) and observed (circles) OM PM<sub>10</sub> annual mean concentrations in µg/m<sup>3</sup> for a. Africa, b. Asia, c. Australia, d. Europe, e. N. America and f. S. America. These show the exact same information as in Figure 7e but in subregions.



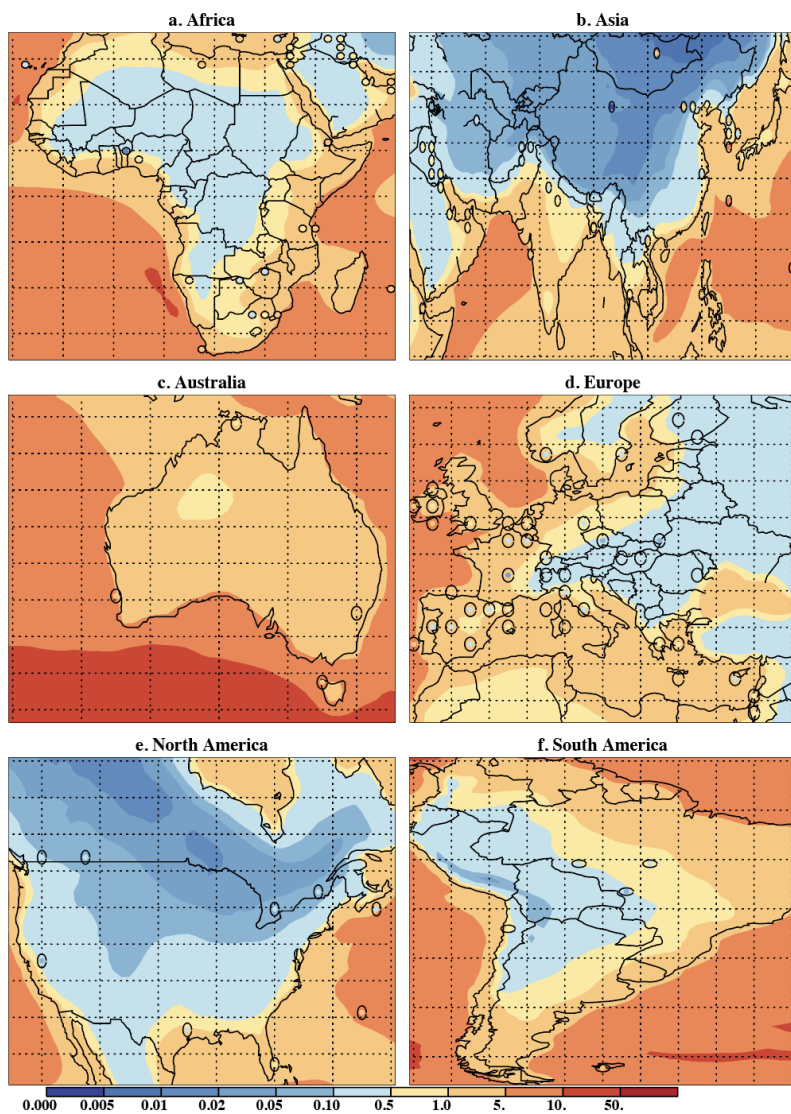

Figure S14: Modeled (background) and observed (circles) Na PM<sub>10</sub> annual mean concentrations in µg/m<sup>3</sup> for a. Africa, b. Asia, c. Australia, d. Europe, e. N. America and f. S. America. These show the exact same information as in Figure 7g but in subregions.



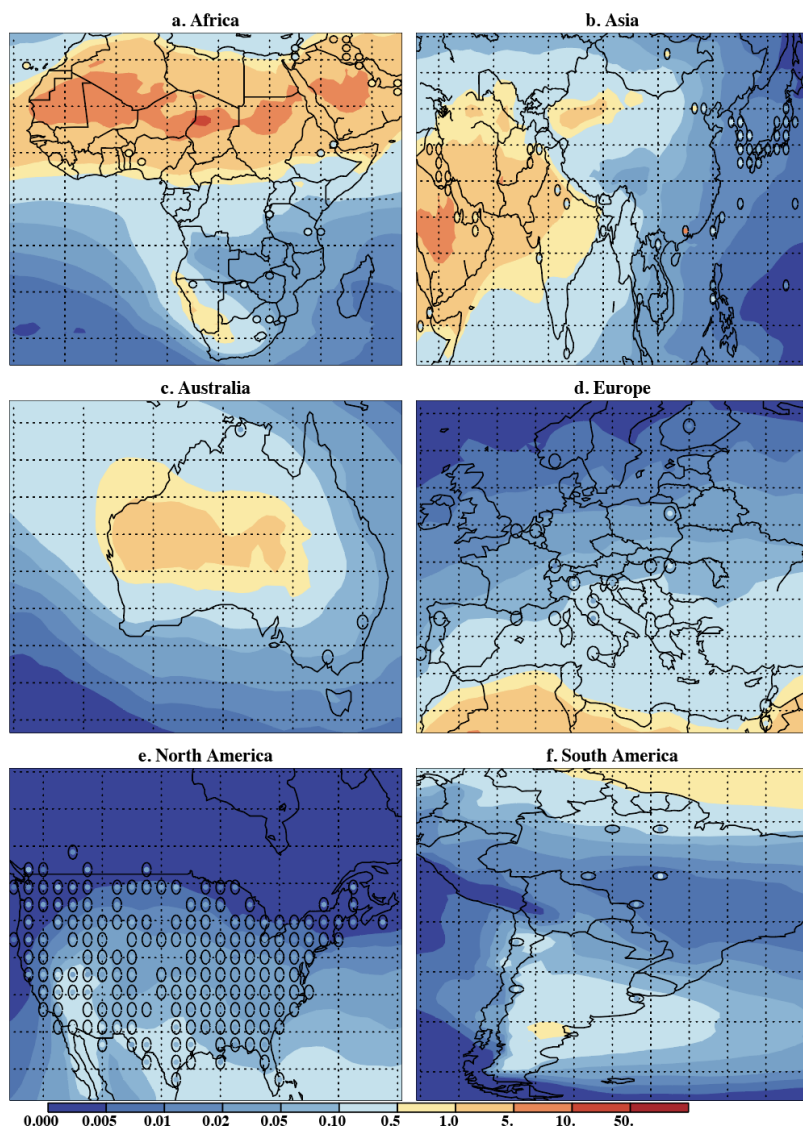

Figure S15: Modeled (background) and observed (circles) Al PM<sub>10</sub> annual mean concentrations in  $\mu\text{g}/\text{m}^3$  for a. Africa, b. Asia, c. Australia, d. Europe, e. N. America and f. S. America These show the exact same information as in Figure 7i but in subregions.

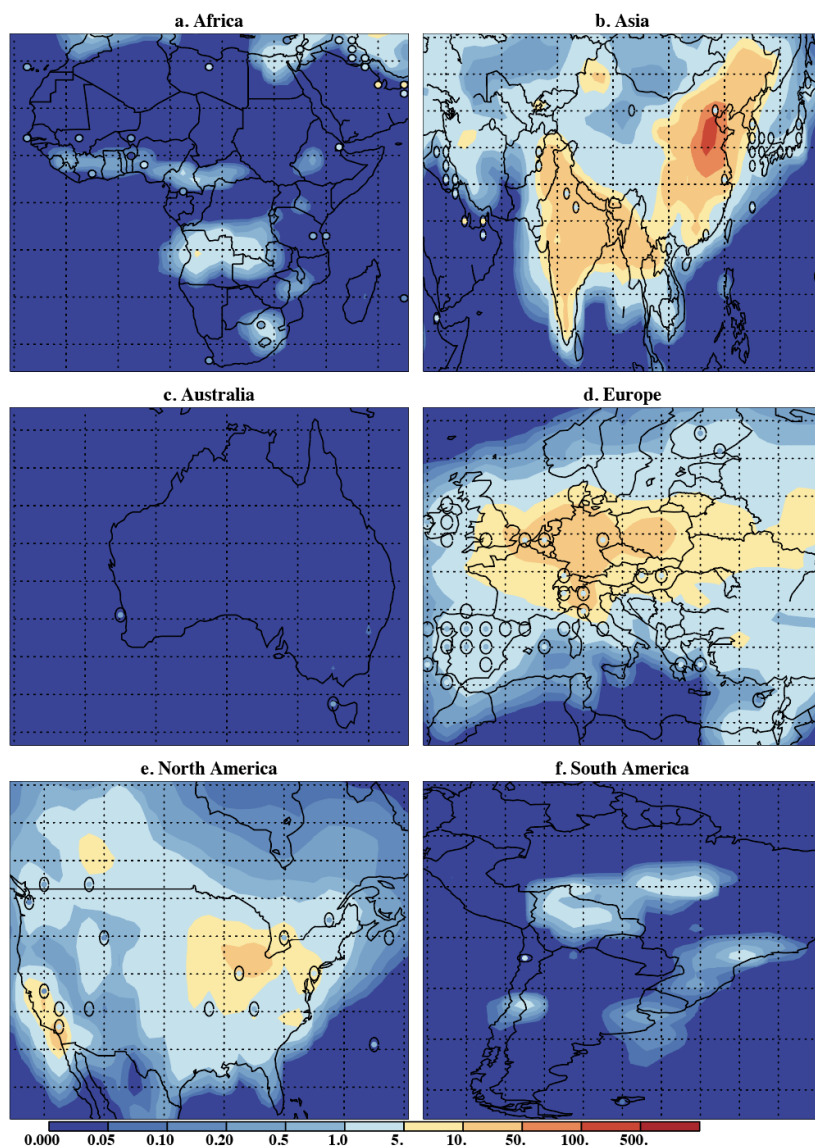

Figure S16: Modeled (background) and observed (circles)  $\text{NO}_3$   $\text{PM}_{10}$  annual mean concentrations in  $\mu\text{g}/\text{m}^3$  for a. Africa, b. Asia, c. Australia, d. Europe, e. N. America and f. S. America. These show the exact same information as in Figure 7k but in subregions.

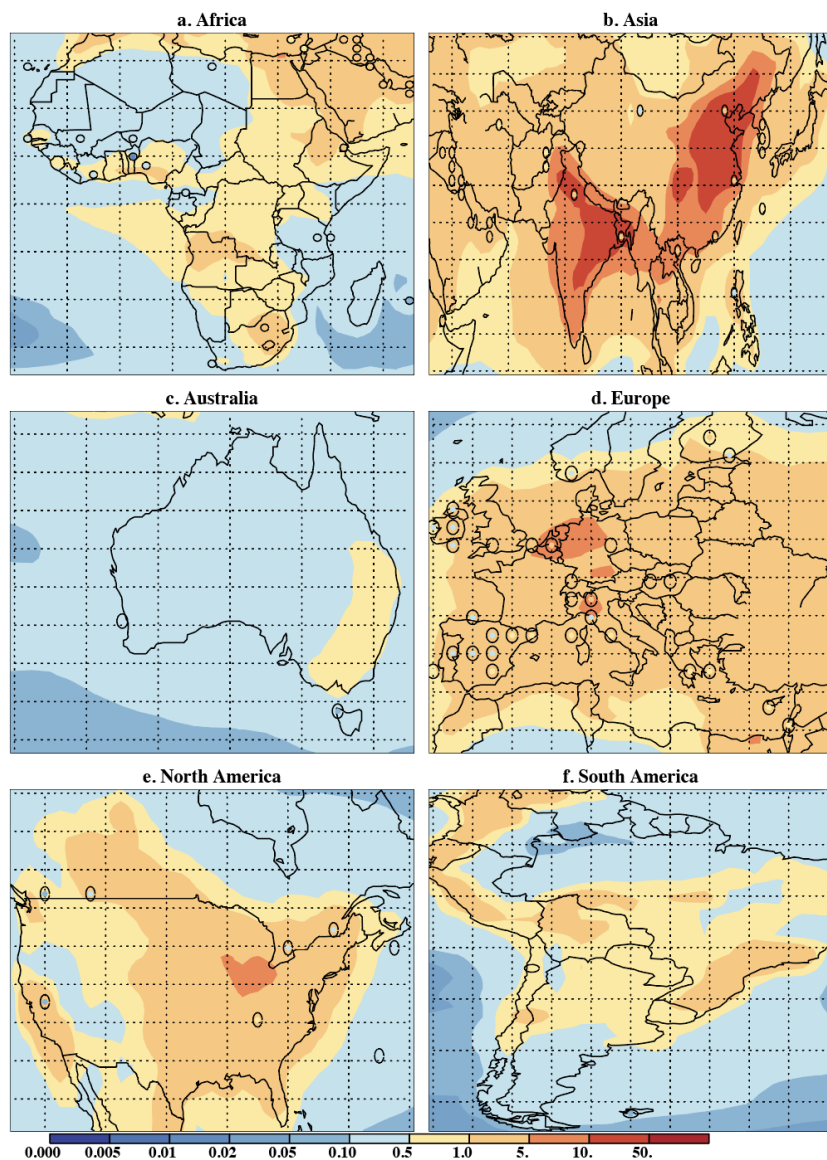

Figure S17: Modeled (background) and observed (circles)  $\text{NO}_3 \text{PM}_{10}$  annual mean concentrations in  $\mu\text{g}/\text{m}^3$  for a. Africa, b. Asia, c. Australia, d. Europe, e. N. America and f. S. America. These show the exact same information as in Figure 71 but in subregions.

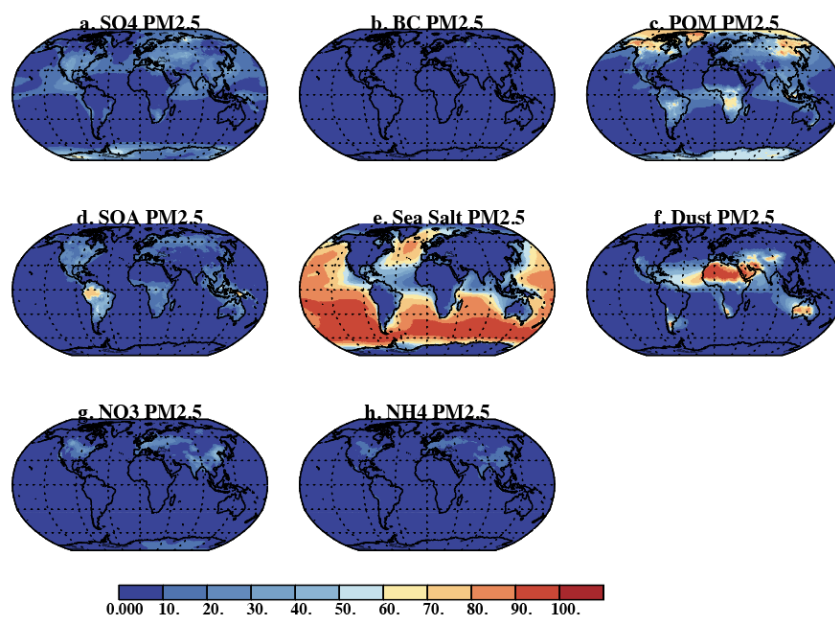

Figure S18: The modeled relative contribution (%) of different aerosol types to the total surface concentration in the  $PM_{2.5}$  aerosol for a)  $SO_4$ , b) BC, c) Primary Organic Material (POM), d) Secondary Organic Aerosol (SOA), e) Sea salt, f) dust, g)  $NO_3$  and h)  $NH_4$ .

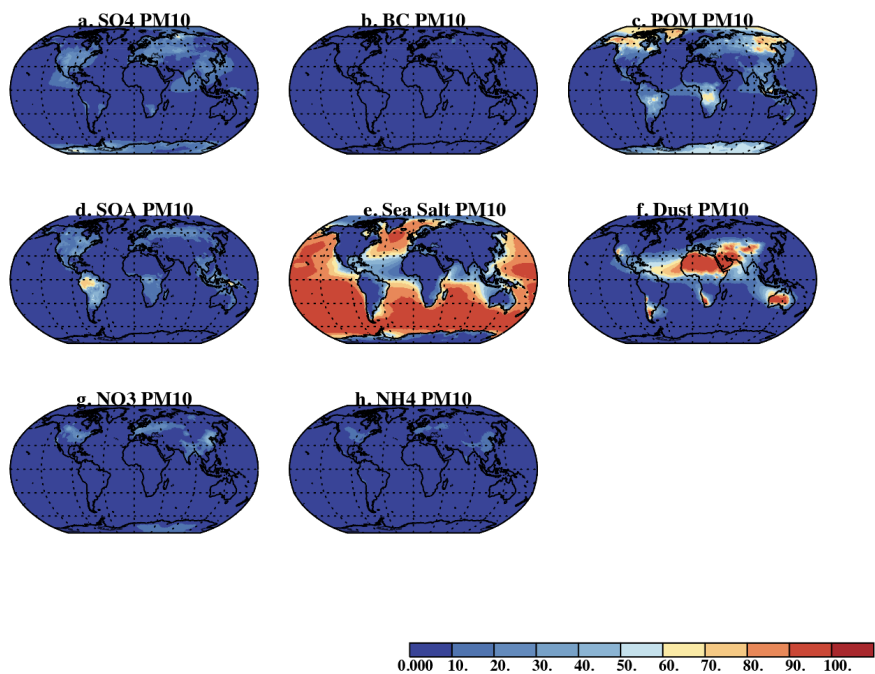

Figure S19: The modeled relative contribution (%) of different aerosol types to the total surface concentration in the PM<sub>10</sub> aerosol for a) SO<sub>4</sub>, b) BC, c) Primary Organic Material (POM), d) Secondary Organic Aerosol (SOA), e) Sea salt, f) dust, g) NO<sub>3</sub> and h) NH<sub>4</sub>.

Table S1: Modelled aerosol composition (rows) and assumed contribution to observed measurements (fractions). Model constituents that are not included in the base CESM are marked with \*.

|                             |      | Measured constituent |      |      |      |      |                 |                 |
|-----------------------------|------|----------------------|------|------|------|------|-----------------|-----------------|
| Modeled aerosol composition | PM   | SO <sub>4</sub>      | EC   | OM   | Na   | Al   | NO <sub>3</sub> | NH <sub>4</sub> |
| SO <sub>4</sub>             | 1.00 | 1.00                 | 0.00 | 0.00 | 0.00 | 0.00 | 0.00            | 0.00            |
| Black carbon                | 1.00 | 0.00                 | 1.00 | 0.00 | 0.00 | 0.00 | 0.00            | 0.00            |
| Primary Organic Matter      | 1.00 | 0.00                 | 0.00 | 1.00 | 0.00 | 0.00 | 0.00            | 0.00            |

Secondary

Organic

|                   |      |      |      |      |      |      |      |      |
|-------------------|------|------|------|------|------|------|------|------|
| Carbon            | 1.00 | 0.00 | 0.00 | 1.00 | 0.00 | 0.00 | 0.00 | 0.00 |
| Sea salts         | 1.00 | 0.00 | 0.00 | 0.00 | 0.31 | 0.00 | 0.00 | 0.00 |
| Dust              | 1.00 | 0.00 | 0.00 | 0.00 | 0.00 | 0.07 | 0.00 | 0.00 |
| NO <sub>3</sub> * | 1.00 | 0.00 | 0.00 | 0.00 | 0.00 | 0.00 | 1.00 | 0.00 |
| NH <sub>4</sub> * | 1.00 | 0.00 | 0.00 | 0.00 | 0.00 | 0.00 | 0.00 | 1.00 |

Table S2: Measurement variables from the supplemental data which are combined in the comparisons and the factor relation. PM=particulate matter; BC=black carbon; EC=elemental carbon; OM=organic matter; OC=organic carbon; Note that the formula from Ash to dust was established by the University of Miami network (Prospero et al., 1996)

| Measured reference constituent | Other measured constituents |              |           |
|--------------------------------|-----------------------------|--------------|-----------|
| PM                             | PM                          |              |           |
| SO <sub>4</sub> <sup>+2</sup>  | SO <sub>4</sub>             | (96/32)*S    |           |
| BC                             | BC                          | EC           |           |
| OM                             | 1.8*OC                      | OM           |           |
| Na                             | Na                          |              |           |
| Al                             | Al                          | 1.4*0.07*Ash | 0.07*Dust |
| NO <sub>3</sub> <sup>-</sup>   | NO <sub>3</sub>             |              |           |
| NH <sub>4</sub> <sup>+</sup>   | NH <sub>4</sub>             |              |           |



Table S3: Uncertainty estimates for model-observational comparisons for different size and composition fractions for the observations. The averaged normalized standard deviation is used for the spatial, within year, and within month estimates of variability. The resulting total annual and monthly uncertainty are assumed to be the square root of the square of each of these errors added together, along with the Measurement system error which is assumed to be 0.3. For more details see Section 2.3 and 3.s. The number of grid boxes with data for the spatial comparison (and used for the within year, within month and interannual variability statistics) is shown as Num.

| Size              | Composition     | Spatial | Within Year | Meas. error | Within Month | Inter-annual | Total Annual Unc. | Total Monthly Unc. | Num. |
|-------------------|-----------------|---------|-------------|-------------|--------------|--------------|-------------------|--------------------|------|
| PM <sub>2.5</sub> | PM              | 0.24    | 0.53        | 0.08        | 0.47         | 0.18         | 0.68              | 0.63               | 548  |
|                   | SO <sub>4</sub> | 0.32    | 0.54        | 0.02        | 0.49         | 0.39         | 0.79              | 0.76               | 163  |
|                   | BC              | 0.42    | 0.50        | 0.11        | 0.47         | 0.22         | 0.76              | 0.74               | 79   |
|                   | OC              | 0.37    | 0.55        | 0.14        | 0.48         | 0.19         | 0.76              | 0.72               | 141  |
|                   | Na              | 0.34    | 0.74        | 0.53        | 0.73         | 0.36         | 1.08              | 1.07               | 161  |
|                   | Al              | 0.26    | 0.67        | 0.24        | 0.55         | 0.46         | 0.93              | 0.85               | 161  |
|                   | NH <sub>4</sub> | 0.41    | 0.95        | 0.04        | 0.73         | 0.28         | 1.11              | 0.93               | 143  |
|                   | NO <sub>3</sub> | 0.34    | 0.64        | 0.02        | 0.62         | 0.26         | 0.83              | 0.82               | 93   |
| PM <sub>10</sub>  | PM              | 0.25    | 0.47        | 0.13        | 0.43         | 0.17         | 0.65              | 0.62               | 536  |
|                   | SO <sub>4</sub> | 0.51    | 0.42        | 0.20        | 0.34         | 0.19         | 0.77              | 0.73               | 50   |
|                   | BC              | 0.33    | 0.48        | 0.07        | 0.40         | 0.20         | 0.69              | 0.64               | 23   |
|                   | OC              | 0.31    | 0.47        | 0.19        | 0.41         | 0.21         | 0.70              | 0.66               | 21   |
|                   | Na              | 0.35    | 0.62        | 0.19        | 0.53         | 0.37         | 0.88              | 0.82               | 47   |
|                   | Al              | 0.61    | 0.72        | 0.06        | 0.55         | 0.56         | 1.14              | 1.04               | 51   |
|                   | NO <sub>3</sub> | 0.20    | 0.63        | 0.01        | 0.54         | 0.24         | 0.77              | 0.70               | 29   |
|                   | NH <sub>4</sub> | 0.30    | 0.74        | 0.01        | 0.59         | 0.30         | 0.90              | 0.78               | 36   |

Commented [1]: check this

Table S4. Comparison of climatological averages versus decadal averages (2010-2019) for different size and composition in the observations. The Kendal (ranked) correlation (r), the slope and uncertainty in the slope, root mean squared (rms), climatological average, and decadal average, number of climatological observation station datasets, and the number of decadal observational datasets, the percentage of the values which are more than 20% different, and the % of values which are outside the 3x uncertainty when decadal averages are compared to climatological averages.

| Size              | Comp.           | r    | Slope | Unc.<br>Slope | rms  | Clim.<br>Avg | Dec.<br>Avg. | Clim.<br>Num | Dec.<br>Num | % ><br>20% | % > 3x |
|-------------------|-----------------|------|-------|---------------|------|--------------|--------------|--------------|-------------|------------|--------|
| PM <sub>2.5</sub> | PM              | 0.92 | 1.04  | 0.0007        | 3.41 | 19.5         | 20.3         | 7080         | 5486        | 3.9        | 0.04   |
|                   | SO <sub>4</sub> | 0.87 | 0.90  | 0.0033        | 0.37 | 1.61         | 1.48         | 817          | 580         | 27.2       | 0.00   |
|                   | BC              | 0.92 | 1.01  | 0.0129        | 0.44 | 2.65         | 2.71         | 62           | 20          | 10.0       | 0.00   |
|                   | OM              | 0.92 | 0.97  | 0.0030        | 0.25 | 2.51         | 2.39         | 602          | 423         | 7.8        | 0.00   |
|                   | Al              | 0.88 | 0.99  | 0.0032        | 0.04 | 0.07         | 0.07         | 829          | 564         | 11.5       | 0.18   |
|                   | Na              | 0.90 | 1.05  | 0.0034        | 0.16 | 0.10         | 0.11         | 836          | 579         | 20.0       | 0.35   |
|                   | NO <sub>3</sub> | 0.93 | 0.94  | 0.0022        | 0.28 | 0.77         | 0.74         | 805          | 575         | 11.5       | 0.00   |
|                   | NH <sub>4</sub> | 0.80 | 0.88  | 0.0026        | 0.19 | 0.81         | 0.73         | 569          | 365         | 40.0       | 0.00   |
| PM <sub>10</sub>  | PM              | 0.93 | 1.03  | 0.0007        | 8.82 | 47.8         | 49.8         | 6142         | 3511        | 6.8        | 0.14   |
|                   | SO <sub>4</sub> | 0.89 | 1.00  | 0.0058        | 0.66 | 2.12         | 2.19         | 185          | 78          | 10.3       | 1.28   |
|                   | BC              | 0.95 | 1.20  | 0.0194        | 3.29 | 3.07         | 4.13         | 30           | 13          | 23.1       | 0.00   |
|                   | OM              |      |       |               |      |              |              | 11           | 0           |            |        |
|                   | Na              | 0.96 | 0.99  | 0.0065        | 0.11 | 0.62         | 0.62         | 162          | 61          | 9.8        | 0.00   |
|                   | Al              | 0.97 | 1.00  | 0.0050        | 0.52 | 0.56         | 0.62         | 165          | 76          | 9.2        | 0.00   |
|                   | NO <sub>3</sub> | 0.93 | 0.98  | 0.0072        | 0.47 | 1.74         | 1.66         | 179          | 63          | 11.1       | 0.00   |
|                   | NH <sub>4</sub> | 0.94 | 1.02  | 0.0094        | 0.40 | 0.74         | 0.76         | 138          | 46          | 8.7        | 2.17   |

Table S5: PM<sub>2.5</sub> comparison statistics for Figures 3 and 5 model data comparisons including Kendall rank correlation coefficient (r), slope (x=observations, y=model) for linear regression with uncertainties, root mean square differences between modeled and observations (RMS), average model at the location of the observations ( $\mu\text{g}/\text{m}^3$ ), fraction of the modeled values which are outside the 3x uncertainty bound and the number of observations (Num. Obs). If there is no data for a region, the region is not included in the table.

| Compositi<br>on | Region            | Kendall<br>Rank<br>Correl. (r) | ( $\mu\text{g}/\text{m}^3$<br>/ $\mu\text{g}/\text{m}^3$ )<br>Slope | ( $\mu\text{g}/\text{m}^3$<br>/ $\mu\text{g}/\text{m}^3$ )<br>Slope<br>Unc. | ( $\mu\text{g}$ )<br>RMS | ( $\mu\text{g}$ )<br>Avg.<br>Mod<br>el | ( $\mu\text{g}$ )<br>Avg.<br>Obs | Frac.<br>>3x | Num.<br>Obs. |
|-----------------|-------------------|--------------------------------|---------------------------------------------------------------------|-----------------------------------------------------------------------------|--------------------------|----------------------------------------|----------------------------------|--------------|--------------|
| PM              | Globe             | 0.60                           | 1.2                                                                 | 0.00                                                                        | 14                       | 20                                     | 17                               | 0.06         | 749          |
| PM              | Africa            | 0.40                           | 0.8                                                                 | 0.01                                                                        | 13                       | 23                                     | 22                               | 0.04         | 45           |
| PM              | Asia              | 0.47                           | 1.3                                                                 | 0.01                                                                        | 21                       | 36                                     | 31                               | 0.08         | 271          |
| PM              | Australia         | 0.09                           | 1.2                                                                 | 0.03                                                                        | 5.2                      | 9.1                                    | 6.0                              | 0.08         | 51           |
| PM              | Europe            | 0.37                           | 1.0                                                                 | 0.01                                                                        | 6.4                      | 13                                     | 12                               | 0.00         | 99           |
| PM              | N. America        | 0.55                           | 1.7                                                                 | 0.01                                                                        | 4.6                      | 9.8                                    | 6.9                              | 0.02         | 259          |
| PM              | S. America        | 0.00                           | 0.58                                                                | 0.02                                                                        | 14                       | 11                                     | 17                               | 0.39         | 23           |
| SO <sub>4</sub> | Globe             | 0.64                           | 1.8                                                                 | 0.01                                                                        | 1.8                      | 2.9                                    | 1.6                              | 0.18         | 318          |
| SO <sub>4</sub> | Africa            | 0.41                           | 1.6                                                                 | 0.04                                                                        | 2.3                      | 2.8                                    | 1.2                              | 0.28         | 18           |
| SO <sub>4</sub> | Asia              | 0.58                           | 1.4                                                                 | 0.01                                                                        | 2.6                      | 4.9                                    | 3.2                              | 0.13         | 55           |
| SO <sub>4</sub> | Australia         | 0.73                           | 3.9                                                                 | 0.34                                                                        | 0.60                     | 0.90                                   | 0.45                             | 0.50         | 6            |
| SO <sub>4</sub> | Europe            | 0.36                           | 1.6                                                                 | 0.03                                                                        | 1.54                     | 2.68                                   | 1.66                             | 0.10         | 42           |
| SO <sub>4</sub> | High<br>Latitudes | -1.00                          | -5.9                                                                | 1.25                                                                        | 0.31                     | 0.43                                   | 0.43                             | 0.00         | 2            |
| SO <sub>4</sub> | N. America        | 0.68                           | 2.1                                                                 | 0.01                                                                        | 1.51                     | 2.60                                   | 1.33                             | 0.18         | 187          |
| SO <sub>4</sub> | S.<br>America     | 0.21                           | 0.16                                                                | 0.04                                                                        | 0.57                     | 0.90                                   | 0.53                             | 0.50         | 8            |
| BC              | Globe             | 0.63                           | 0.80                                                                | 0.01                                                                        | 1.1                      | 0.58                                   | 0.86                             | 0.12         | 220          |
| BC              | Africa            | 0.14                           | 0.51                                                                | 0.01                                                                        | 2.0                      | 0.97                                   | 1.9                              | 0.22         | 18           |
| BC              | Asia              | 0.36                           | 1.0                                                                 | 0.02                                                                        | 1.7                      | 1.4                                    | 1.8                              | 0.20         | 45           |
| BC              | Australia         | 1.00                           | 0.39                                                                | 0.02                                                                        | 1.4                      | 0.90                                   | 1.8                              | 0.00         | 3            |
| BC              | Europe            | 0.24                           | 0.41                                                                | 0.01                                                                        | 1.9                      | 0.59                                   | 2.1                              | 0.36         | 11           |
| BC              | N. America        | 0.54                           | 0.95                                                                | 0.01                                                                        | 0.21                     | 0.24                                   | 0.2                              | 0.05         | 135          |
| BC              | S.<br>America     | 0.43                           | 0.48                                                                | 0.02                                                                        | 1.5                      | 0.92                                   | 1.9                              | 0.29         | 7            |
| OM              | Globe             | 0.43                           | 1.1                                                                 | 0.01                                                                        | 2.9                      | 4.5                                    | 3.9                              | 0.09         | 264          |
| OM              | Africa            | 0.52                           | 3.3                                                                 | 0.15                                                                        | 7.4                      | 10.1                                   | 6.5                              | 0.43         | 7            |
| OM              | Asia              | 0.21                           | 1.3                                                                 | 0.02                                                                        | 4.3                      | 5.97                                   | 5.6                              | 0.19         | 32           |
| OM              | Europe            | 0.47                           | 0.9                                                                 | 0.01                                                                        | 2.5                      | 3.7                                    | 4.0                              | 0.00         | 41           |
| OM              | N. America        | 0.45                           | 1.1                                                                 | 0.01                                                                        | 2.2                      | 4.2                                    | 3.5                              | 0.08         | 183          |
| Na              | Globe             | 0.53                           | 2.7                                                                 | 0.02                                                                        | 0.35                     | 0.27                                   | 0.13                             | 0.30         | 308          |
| Na              | Africa            | 0.18                           | 3.2                                                                 | 0.14                                                                        | 0.54                     | 0.53                                   | 0.18                             | 0.40         | 15           |
| Na              | Asia              | -0.01                          | 3.3                                                                 | 0.06                                                                        | 0.43                     | 0.41                                   | 0.27                             | 0.46         | 54           |

|                 |                |       |       |      |      |      |      |      |     |
|-----------------|----------------|-------|-------|------|------|------|------|------|-----|
| Na              | Australia      | 0.60  | 1.7   | 0.12 | 0.60 | 0.83 | 0.27 | 0.83 | 6   |
| Na              | Europe         | 0.41  | 4.9   | 0.10 | 0.41 | 0.41 | 0.15 | 0.56 | 39  |
| Na              | High Latitudes | 1.00  | 1.8   | 2.0  | 0.07 | 0.21 | 0.13 | 0.00 | 2   |
| Na              | N. America     | 0.53  | 2.2   | 0.02 | 0.28 | 0.17 | 0.08 | 0.17 | 187 |
| Na              | S. America     | 0.40  | 1.8   | 0.07 | 0.16 | 0.22 | 0.14 | 0.40 | 5   |
| Al              | Globe          | 0.53  | 1.4   | 0.01 | 0.60 | 0.18 | 0.14 | 0.44 | 290 |
| Al              | Africa         | 0.60  | 3.1   | 0.07 | 0.45 | 0.43 | 0.25 | 0.33 | 15  |
| Al              | Asia           | 0.60  | 0.84  | 0.02 | 1.34 | 0.64 | 0.48 | 0.69 | 55  |
| Al              | Australia      | 0.20  | 8.3   | 0.96 | 0.05 | 0.06 | 0.05 | 0.33 | 6   |
| Al              | Europe         | 0.44  | 1.1   | 0.02 | 0.06 | 0.08 | 0.08 | 0.24 | 17  |
| Al              | HighLatitudes  | -1.00 | -0.09 | 0.00 | 0.02 | 0.00 | 0.02 | 1.00 | 2   |
| Al              | N. America     | 0.60  | 1.4   | 0.01 | 0.05 | 0.04 | 0.04 | 0.38 | 187 |
| Al              | S. America     | -0.50 | -5.3  | 0.34 | 0.16 | 0.07 | 0.11 | 0.63 | 8   |
| NO <sub>3</sub> | Globe          | 0.55  | 2.9   | 0.01 | 3.11 | 2.0  | 0.78 | 0.46 | 283 |
| NO <sub>3</sub> | Africa         | -0.07 | 11    | 0.49 | 0.54 | 0.29 | 0.20 | 0.73 | 11  |
| NO <sub>3</sub> | Asia           | 0.38  | 2.1   | 0.03 | 6.82 | 3.0  | 0.98 | 0.50 | 44  |
| NO <sub>3</sub> | Australia      | 1.00  | 21    | 3.4  | 0.75 | 0.66 | 0.22 | 1.00 | 2   |
| NO <sub>3</sub> | Europe         | 0.62  | 2.9   | 0.03 | 2.58 | 3.2  | 1.55 | 0.53 | 40  |
| NO <sub>3</sub> | N. America     | 0.60  | 2.9   | 0.02 | 1.52 | 1.6  | 0.62 | 0.41 | 183 |
| NO <sub>3</sub> | S. America     | -1.00 | -9.0  | 10.5 | 0.39 | 0.09 | 0.47 | 0.50 | 2   |
| NH <sub>4</sub> | Globe          | 0.52  | 1.8   | 0.01 | 1.16 | 1.3  | 0.79 | 0.16 | 222 |
| NH <sub>4</sub> | Africa         | 0.75  | 1.3   | 0.03 | 0.28 | 0.57 | 0.39 | 0.18 | 11  |
| NH <sub>4</sub> | Asia           | 0.36  | 1.8   | 0.03 | 2.17 | 1.9  | 1.3  | 0.12 | 41  |
| NH <sub>4</sub> | Australia      | 1.00  | 2.7   | 0.13 | 1.56 | 1.9  | 0.63 | 0.50 | 2   |
| NH <sub>4</sub> | Europe         | 0.57  | 2.2   | 0.03 | 0.91 | 1.5  | 0.79 | 0.23 | 39  |
| NH <sub>4</sub> | N. America     | 0.56  | 1.8   | 0.01 | 0.73 | 1.2  | 0.68 | 0.13 | 126 |
| NH <sub>4</sub> | S. America     | -1.00 | -0.37 | 0.04 | 0.33 | 0.40 | 0.50 | 0.00 | 2   |

Table S6: The % difference between the PM<sub>2.5</sub> comparison statistics for Figures 3 and 5 model data comparisons using decadal averages for 2010-2019 versus those used in Table S5. Columns where the amount of datasets included change less than 25% are highlighted in grey. These values including Kendall rank correlation coefficient (r), slope (x=observations, y=model) for linear regression with uncertainties, root mean square differences between modeled and observations (RMS), average model at the location of the observations (μg/m<sup>3</sup>), fraction of the modeled values which are outside the 3x uncertainty bound and the number of observations (Num. Obs). If there is no data in the region for that composition for the climatological data, the line in the table is skipped. If there is not data for the decadal comparison, the line in the table is left blank.

| Compositi<br>on | Region               | Kendall<br>Rank<br>Correl.<br>(r) | ( $\mu\text{g}/\text{m}^3$<br>/ $\mu\text{g}/\text{m}^3$ )<br>Slope | ( $\mu\text{g}/\text{m}^3$<br>/ $\mu\text{g}/\text{m}^3$ )<br>Slope<br>Unc. | ( $\mu\text{g}$<br>)<br>R<br>MS | ( $\mu\text{g}$ )<br>Avg.<br>Model | ( $\mu\text{g}$ )<br>Avg.<br>Obs | Frac.<br>>3x | Num.<br>Obs. |
|-----------------|----------------------|-----------------------------------|---------------------------------------------------------------------|-----------------------------------------------------------------------------|---------------------------------|------------------------------------|----------------------------------|--------------|--------------|
| PM              | Globe                | -3                                | -4                                                                  | -5                                                                          | -4                              | -3                                 | 2                                | -6           | -12          |
| PM              | Africa               | 6                                 | -26                                                                 | 10                                                                          | 3                               | -8                                 | 4                                | -13          | -42          |
| PM              | Asia                 | 9                                 | -7                                                                  | 7                                                                           | -4                              | 0                                  | 8                                | 10           | -13          |
| PM              | Australia            | 120                               | 27                                                                  | 45                                                                          | -30                             | -5                                 | 25                               | -72          | -12          |
| PM              | Europe<br>N.         | -4                                | 2                                                                   | 16                                                                          | 1                               | -1                                 | -5                               | NaN          | -12          |
| PM              | America<br>S.        | -13                               | 18                                                                  | 39                                                                          | 16                              | 1                                  | -6                               | 21           | -3           |
| PM              | America              | -930                              | -30                                                                 | -19                                                                         | 9                               | -44                                | 3                                | -15          | -22          |
| Al              | Globe                | 5                                 | 7                                                                   | 14                                                                          | -11                             | -58                                | -26                              | -1           | -24          |
| SO <sub>4</sub> | Globe                | -7                                | 26                                                                  | 43                                                                          | 11                              | -3                                 | -17                              | 62           | -21          |
| SO <sub>4</sub> | Africa               | 50                                | -10                                                                 | 11                                                                          | -5                              | 31                                 | 50                               | -49          | -61          |
| SO <sub>4</sub> | Asia                 | -15                               | -10                                                                 | 36                                                                          | -5                              | -10                                | -9                               | -10          | -36          |
| SO <sub>4</sub> | Australia            | -9                                | -80                                                                 | -87                                                                         | 1                               | 5                                  | 31                               | 0            | -33          |
| SO <sub>4</sub> | Europe               | -22                               | 2                                                                   | 14                                                                          | 16                              | -1                                 | 1                                | 24           | -19          |
| SO <sub>4</sub> | High Latitudes<br>N. |                                   |                                                                     |                                                                             |                                 |                                    |                                  |              |              |
| SO <sub>4</sub> | America<br>S.        | 0                                 | 41                                                                  | 28                                                                          | 26                              | 0                                  | -26                              | 100          | -10          |
| SO <sub>4</sub> | America              | -570                              | -1400                                                               | 280                                                                         | 40                              | 31                                 | 36                               | -33          | -63          |
| BC              | Globe                | 3                                 | 41                                                                  | 38                                                                          | -22                             | -14                                | -34                              | -1           | -26          |
| BC              | Africa               | 420                               | 94                                                                  | 150                                                                         | -60                             | 33                                 | -41                              | -100         | -56          |
| BC              | Asia                 | 62                                | 0                                                                   | 33                                                                          | 9                               | 8                                  | 2                                | -42          | -42          |
| BC              | Australia            |                                   |                                                                     |                                                                             |                                 |                                    |                                  |              |              |
| BC              | Europe<br>N.         | -100                              | -98                                                                 | -69                                                                         | 7                               | -15                                | -3                               | 37           | -64          |
| BC              | America<br>S.        | 2                                 | 23                                                                  | 35                                                                          | -31                             | -2                                 | -25                              | 90           | -10          |
| BC              | America              | 130                               | -62                                                                 | -11                                                                         | -29                             | -77                                | -38                              | 250          | -71          |
| OM              | Globe                | 17                                | 11                                                                  | 8                                                                           | -15                             | -3                                 | -16                              | 11           | -14          |
| OM              | Africa               | 15                                | -31                                                                 | -40                                                                         | -19                             | -13                                | 3                                | -22          | -14          |
| OM              | Asia                 | 180                               | 7                                                                   | 22                                                                          | -41                             | -13                                | -41                              | -41          | -44          |

|                 |               |      |      |       |     |     |     |     |     |
|-----------------|---------------|------|------|-------|-----|-----|-----|-----|-----|
| OM              | Europe        | 5    | 10   | 2     | -25 | 1   | -10 | NaN | -10 |
| OM              | N. America    | 14   | 15   | 15    | 2   | 1   | -12 | 40  | -10 |
| Na              | Globe         | 10   | -100 | -100  | 32  | -3  | 10  | -6  | -20 |
| Na              | Africa        | -100 | 2500 | 19000 | 18  | 12  | 13  | 0   | -67 |
| Na              | Asia          | 1400 | -100 | -96   | 12  | 0   | 16  | 80  | 5   |
| Na              | Australia     | -44  | -11  | 16    | -5  | 4   | 35  | -40 | -33 |
| Na              | Europe        | 11   | -11  | -10   | -1  | 4   | -20 | 2   | -15 |
| Na              | HighLatitudes |      |      |       |     |     |     |     |     |
| Na              | N. America    | 1    | -1   | -7    | 1   | -1  | -6  | 1   | -10 |
| Na              | S. America    | 150  | 250  | 1400  | 24  | 34  | 90  | 25  | -60 |
| Al              | Africa        | -44  | 9    | 170   | 15  | 15  | 40  | 50  | -73 |
| Al              | Asia          | -14  | -81  | -81   | -1  | -71 | -21 | 6   | -38 |
| Al              | Australia     | -270 | -69  | -81   | -24 | -31 | 14  | -25 | -33 |
| Al              | Europe        | -150 | -151 | -10   | 26  | 14  | 30  | 21  | -59 |
| Al              | HighLatitudes |      |      |       |     |     |     |     |     |
| Al              | N. America    | 8    | 5    | 28    | -1  | -2  | 0   | 0   | -10 |
| Al              | S. America    | 100  | -86  | -86   | -49 | 52  | -14 | -47 | -63 |
| NO <sub>3</sub> | Globe         | 8    | 22   | 32    | 7   | 2   | -8  | 17  | -16 |
| NO <sub>3</sub> | Africa        | -550 | -65  | -72   | 7   | 53  | 12  | -21 | -36 |
| NO <sub>3</sub> | Asia          | 79   | 7    | 10    | 20  | 19  | -28 | -21 | -36 |
| NO <sub>3</sub> | Australia     |      |      |       |     |     |     |     |     |
| NO <sub>3</sub> | Europe        | -4   | -10  | -14   | 11  | -5  | 20  | -13 | -18 |
| NO <sub>3</sub> | N. America    | -1   | 34   | 28    | 10  | 2   | -16 | 40  | -9  |
| NO <sub>3</sub> | S. America    | 0    | 0    | 0     | 0   | 0   | 0   | 0   | 0   |
| NH <sub>4</sub> | Globe         | -3   | 34   | 48    | 16  | 8   | -19 | 110 | -27 |
| NH <sub>4</sub> | Africa        | 9    | 2    | 14    | 28  | 28  | 32  | -21 | -36 |
| NH <sub>4</sub> | Asia          | 51   | 0    | 19    | 18  | 16  | -6  | -2  | -39 |
| NH <sub>4</sub> | Australia     |      |      |       |     |     |     |     |     |
| NH <sub>4</sub> | Europe        | 12   | 7    | 20    | 1   | -3  | -9  | 24  | -28 |



|                 |            |    |    |    |    |   |     |     |     |
|-----------------|------------|----|----|----|----|---|-----|-----|-----|
| NH <sub>4</sub> | N.         |    |    |    |    |   |     |     |     |
|                 | America    | -8 | 51 | 61 | 38 | 9 | -30 | 210 | -22 |
| NH <sub>4</sub> | S. America |    |    |    |    |   |     |     |     |

Table S7: PM<sub>10</sub> comparison statistics for Figures 6 and 7 model data comparisons including Kendall rank correlation coefficient (r), slope (x=observations, y=model) for linear regression with uncertainties, root mean square differences between modeled and observations (RMS), average model at the location of the observations ( $\mu\text{g}/\text{m}^3$ ), fraction of the modeled values which are outside the 3x uncertainty bound and the number of observations (Num. Obs). If there is no data for a region, the region is not included in the table.

| Comp<br>osition | Region            | Kendall<br>Rank<br>Correl. (r) | ( $\mu\text{g}/\text{m}^3$<br>/ $\mu\text{g}/\text{m}^3$ )<br>Slope | ( $\mu\text{g}/\text{m}^3$<br>/ $\mu\text{g}/\text{m}^3$ )<br>Slope<br>Unc. | ( $\mu\text{g}$ )<br>RMS | ( $\mu\text{g}$ )<br>Avg.<br>Model | ( $\mu\text{g}$ )<br>Avg.<br>Obs | Frac.<br>>3x | Num.<br>Obs. |
|-----------------|-------------------|--------------------------------|---------------------------------------------------------------------|-----------------------------------------------------------------------------|--------------------------|------------------------------------|----------------------------------|--------------|--------------|
| PM              | Globe             | 0.55                           | 1.5                                                                 | 0.00                                                                        | 57                       | 58                                 | 38                               | 0.08         | 702          |
| PM              | Africa            | 0.36                           | 1.9                                                                 | 0.04                                                                        | 130                      | 120                                | 53                               | 0.23         | 43           |
| PM              | Asia              | 0.48                           | 1.9                                                                 | 0.01                                                                        | 79                       | 100                                | 70                               | 0.07         | 231          |
| PM              | Australia         | 0.08                           | -160.0                                                              | 93                                                                          | 22                       | 30                                 | 16                               | 0.07         | 57           |
| PM              | Europe            | 0.52                           | 1.6                                                                 | 0.01                                                                        | 18                       | 35                                 | 22                               | 0.14         | 116          |
| PM              | High<br>Latitudes | 0.33                           | 2.2                                                                 | 0.08                                                                        | 2.6                      | 4.6                                | 2.8                              | 0.33         | 3            |
| PM              | N.<br>America     | 0.37                           | 2.8                                                                 | 0.03                                                                        | 13                       | 24                                 | 17                               | 0.02         | 230          |
| PM              | S.<br>America     | -0.06                          | 0.81                                                                | 0.04                                                                        | 24                       | 31                                 | 34                               | 0.14         | 22           |
| SO <sub>4</sub> | Globe             | 0.43                           | 2.8                                                                 | 0.02                                                                        | 5.3                      | 6.0                                | 3.4                              | 0.48         | 164          |
| SO <sub>4</sub> | Africa            | 0.32                           | 2.3                                                                 | 0.04                                                                        | 5.0                      | 5.1                                | 1.6                              | 0.50         | 26           |
| SO <sub>4</sub> | Asia              | 0.44                           | 1.1                                                                 | 0.02                                                                        | 7.2                      | 9.8                                | 7.6                              | 0.36         | 50           |
| SO <sub>4</sub> | Australia         | -0.15                          | -0.06                                                               | 0.02                                                                        | 1.1                      | 1.4                                | 0.82                             | 0.25         | 12           |
| SO <sub>4</sub> | Europe            | 0.21                           | 2.6                                                                 | 0.05                                                                        | 4.6                      | 5.6                                | 1.61                             | 0.63         | 43           |
| SO <sub>4</sub> | High<br>Latitudes | 0.67                           | 0.68                                                                | 0.03                                                                        | 0.50                     | 0.53                               | 0.91                             | 0.25         | 4            |
| SO <sub>4</sub> | N.<br>America     | 0.26                           | 3.6                                                                 | 0.10                                                                        | 3.9                      | 4.4                                | 1.7                              | 0.59         | 22           |
| SO <sub>4</sub> | S.<br>America     | 0.33                           | 1.2                                                                 | 0.06                                                                        | 0.93                     | 1.6                                | 1.0                              | 0.43         | 7            |
| BC              | Globe             | 0.47                           | 0.86                                                                | 0.01                                                                        | 2.2                      | 1.9                                | 2.0                              | 0.16         | 85           |
| BC              | Africa            | 0.35                           | 0.00                                                                | 0.00                                                                        | 2.1                      | 2.0                                | 2.0                              | 0.20         | 20           |

|                 |                   |       |       |      |      |      |      |      |     |
|-----------------|-------------------|-------|-------|------|------|------|------|------|-----|
| BC              | Asia              | 0.19  | 0.61  | 0.01 | 3.6  | 3.5  | 3.6  | 0.14 | 22  |
| BC              | Australia         | 1.00  | 1.08  | 0.12 | 0.29 | 1.1  | 0.77 | 0.00 | 2   |
| BC              | Europe            | 0.16  | 0.4   | 0.02 | 1.4  | 1.2  | 1.6  | 0.22 | 18  |
| BC              | N.<br>America     | 0.52  | 1.4   | 0.05 | 0.58 | 0.76 | 0.62 | 0.13 | 16  |
| BC              | S.<br>America     | 0.73  | 0.93  | 0.03 | 0.99 | 2.0  | 2.3  | 0.17 | 6   |
| OM              | Globe             | 0.26  | 1.5   | 0.02 | 10   | 11   | 5.6  | 0.29 | 72  |
| OM              | Africa            | 0.14  | 2.6   | 0.11 | 18   | 18   | 10   | 0.50 | 8   |
| OM              | Asia              | 0.10  | 0.68  | 0.04 | 15   | 15   | 7.6  | 0.36 | 14  |
| OM              | Europe            | 0.40  | 1.2   | 0.02 | 4.2  | 7.6  | 4.9  | 0.08 | 39  |
| OM              | N.<br>America     | 0.11  | 7.2   | 0.26 | 11   | 11   | 2.4  | 0.89 | 9   |
| Na              | Globe             | 0.49  | 2.2   | 0.02 | 3.9  | 2.4  | 1.90 | 0.50 | 135 |
| Na              | Africa            | 0.40  | 2.2   | 0.04 | 3.3  | 3.2  | 1.08 | 0.45 | 20  |
| Na              | Asia              | 0.43  | 0.81  | 0.01 | 2.7  | 1.6  | 2.3  | 0.35 | 40  |
| Na              | Australia         | 0.55  | 0.03  | 0.00 | 10   | 4.5  | 7.0  | 0.58 | 12  |
| Na              | Europe            | 0.63  | 3.1   | 0.04 | 1.8  | 2.0  | 0.83 | 0.56 | 39  |
| Na              | High<br>Latitudes | 1.00  | 1.7   | 0.06 | 0.6  | 1.4  | 0.87 | 0.50 | 4   |
| Na              | N.<br>America     | 0.62  | 3.0   | 0.06 | 2.8  | 3.2  | 1.3  | 0.60 | 15  |
| Na              | S.<br>America     | 0.80  | 2.7   | 0.15 | 2.2  | 1.8  | 0.57 | 0.80 | 5   |
| Al              | Globe             | 0.46  | 1.9   | 0.02 | 7.3  | 3.0  | 0.69 | 0.54 | 140 |
| Al              | Africa            | 0.24  | 3.8   | 0.09 | 6.4  | 4.5  | 1.2  | 0.55 | 22  |
| Al              | Asia              | 0.47  | 4.4   | 0.09 | 13   | 7.7  | 1.3  | 0.74 | 38  |
| Al              | Australia         | 0.29  | -0.12 | 0.00 | 0.21 | 0.22 | 0.21 | 0.25 | 8   |
| Al              | Europe            | 0.43  | 1.9   | 0.03 | 0.37 | 0.31 | 0.21 | 0.35 | 43  |
| Al              | High<br>Latitudes | 0.00  | 1.1   | 0.09 | 0.02 | 0.00 | 0.02 | 0.80 | 5   |
| Al              | N.<br>America     | 0.42  | 0.82  | 0.02 | 0.89 | 0.53 | 0.24 | 0.56 | 16  |
| Al              | S.<br>America     | -0.29 | -0.23 | 0.01 | 1.0  | 0.33 | 0.65 | 0.75 | 8   |
| NO <sub>3</sub> | Globe             | 0.39  | 3.0   | 0.03 | 9.1  | 3.8  | 1.5  | 0.69 | 129 |
| NO <sub>3</sub> | Africa            | 0.01  | 3.8   | 0.14 | 0.67 | 0.37 | 0.64 | 0.88 | 17  |

|                 |                |       |       |      |      |      |      |      |    |
|-----------------|----------------|-------|-------|------|------|------|------|------|----|
| NO <sub>3</sub> |                |       |       |      |      |      |      |      |    |
| NO <sub>3</sub> | Asia           | 0.31  | 1.9   | 0.03 | 15   | 6.3  | 2.3  | 0.55 | 40 |
| NO <sub>3</sub> | Australia      | 0.31  | 7.1   | 0.36 | 0.70 | 0.26 | 0.21 | 1.00 | 10 |
| NO <sub>3</sub> | Europe         | 0.38  | 3.7   | 0.05 | 4.4  | 4.3  | 1.8  | 0.54 | 35 |
| NO <sub>3</sub> | High Latitudes | -0.33 | -2.7  | 0.77 | 0.01 | 0.01 | 0.02 | 0.67 | 3  |
| NO <sub>3</sub> | N. America     | 0.29  | 9.3   | 0.18 | 4.6  | 3.6  | 0.75 | 0.86 | 22 |
| NO <sub>3</sub> | S. America     | -1.00 | -0.01 | 0.00 | 1.0  | 0.00 | 0.75 | 1.00 | 2  |
| NH <sub>4</sub> | Globe          | 0.57  | 2.9   | 0.02 | 3.6  | 2.5  | 0.81 | 0.49 | 98 |
| NH <sub>4</sub> | Africa         | 0.55  | 2.5   | 0.05 | 0.88 | 0.81 | 0.31 | 0.35 | 17 |
| NH <sub>4</sub> | Asia           | 0.37  | 2.1   | 0.04 | 6.3  | 4.7  | 1.6  | 0.33 | 27 |
| NH <sub>4</sub> | Australia      | 0.73  | 6.8   | 0.25 | 2.4  | 1.4  | 0.22 | 0.83 | 6  |
| NH <sub>4</sub> | Europe         | 0.45  | 3.6   | 0.06 | 2.1  | 2.6  | 0.85 | 0.58 | 31 |
| NH <sub>4</sub> | High Latitudes | 0.33  | 1.7   | 0.27 | 0.02 | 0.01 | 0.03 | 0.67 | 3  |
| NH <sub>4</sub> | N. America     | 0.09  | 4.2   | 0.23 | 1.7  | 1.4  | 0.27 | 0.67 | 12 |
| NH <sub>4</sub> | S. America     | 1.00  | 0.76  | 0.04 | 0.09 | 0.37 | 0.41 | 0.00 | 2  |

Table S8: The % difference between the PM<sub>10</sub> comparison statistics for Figures 6 and 7 model data comparisons using decadal averages for 2010-2019 versus those used in Table S7. Columns where the amount of datasets included change less than 25% are highlighted in grey. These values including Kendall rank correlation coefficient (r), slope (x=observations, y=model) for linear regression with uncertainties, root mean square differences between modeled and observations (RMS), average model at the location of the observations (µg/m<sup>3</sup>), fraction of the modeled values which are outside the 3x uncertainty bound and the number of observations (Num. Obs). If there is no data in the region for that composition for the climatological data, the line in the table is skipped. If there is not data for the decadal comparison, the line in the table is left blank.

| Size | Composit<br>ion | Region | Kendall<br>Rank<br>Correl.<br>(r) | (ug/<br>ug)<br>Slop<br>e | (ug/ug<br>)<br>Slope<br>Unc. | (ug<br>)<br>R<br>M<br>S | (ug)<br>Avg.<br>Model | (ug)<br>Avg.<br>Obs | Frac.<br>>3x | Num.<br>Obs. |
|------|-----------------|--------|-----------------------------------|--------------------------|------------------------------|-------------------------|-----------------------|---------------------|--------------|--------------|
| PM10 | PM              | Globe  | -3                                | -6                       | 70                           | -12                     | -3                    | 3                   | 20           | -17          |
| PM10 | PM              | Africa | -9                                | -32                      | -9                           | 7                       | 11                    | 11                  | -2           | -19          |
| PM10 | PM              | Asia   | -4                                | -7                       | -8                           | -27                     | -12                   | -1                  | 0            | -12          |

|      |     |                   |      |      |      |     |      |      |      |      |
|------|-----|-------------------|------|------|------|-----|------|------|------|------|
| PM10 | PM  | Australia         | 89   | -102 | -100 | -27 | -6   | 25   | -72  | -11  |
| PM10 | PM  | Europe            | 0    | 1    | 6    | 7   | 0    | -1   | 46   | -6   |
|      |     |                   |      |      |      | -10 |      |      |      |      |
| PM10 | PM  | High Latitudes N. | -100 | -100 | -100 | 0   | -100 | -100 | -100 | -100 |
| PM10 | PM  | America S.        | -7   | 10   | 31   | 15  | 6    | -8   | 91   | -27  |
| PM10 | PM  | America           | 311  | -35  | -40  | -5  | -28  | 3    | 38   | -27  |
| PM10 | SO4 | Globe             | -24  | 14   | 46   | 11  | 11   | -32  | 41   | -54  |
| PM10 | SO4 | Africa            | 123  | 33   | 156  | 28  | 37   | 4    | 43   | -73  |
| PM10 | SO4 | Asia              | -31  | 92   | 199  | 4   | -3   | -40  | 9    | -54  |
|      |     |                   |      | -900 |      |     |      |      |      |      |
| PM10 | SO4 | Australia         | -540 | 0    | 1600 | 43  | 39   | -44  | 200  | -67  |
| PM10 | SO4 | Europe            | -35  | -9   | 19   | 13  | 8    | -20  | 37   | -19  |
|      |     |                   |      |      |      | -10 |      |      |      |      |
| PM10 | SO4 | High Latitudes N. | -100 | -100 | -100 | 0   | -100 | -100 | -100 | -100 |
| PM10 | SO4 | America           | -75  | 79   | 541  | -11 | -19  | -44  | 13   | -73  |
|      |     |                   |      |      |      | -10 |      |      |      |      |
| PM10 | SO4 | S. America        | -100 | -100 | -100 | 0   | -100 | -100 | -100 | -100 |
| PM10 | BC  | Globe             | 37   | 6    | 103  | 8   | 8    | 35   | -7   | -69  |
|      |     |                   |      | -400 |      |     |      |      |      |      |
| PM10 | BC  | Africa            | 147  | 00   | 2300 | -29 | 17   | -28  | -38  | -60  |
| PM10 | BC  | Asia              | -271 | -93  | -27  | 8   | 86   | 211  | 83   | -82  |
|      |     |                   |      |      |      | -10 |      |      |      |      |
| PM10 | BC  | Australia         | -100 | -100 | -100 | 0   | -100 | -100 | NaN  | -100 |
| PM10 | BC  | Europe N.         | -71  | -98  | -63  | 11  | -24  | 10   | 29   | -61  |
| PM10 | BC  | America           | 16   | 6    | 58   | -62 | -18  | -14  | -100 | -69  |
|      |     |                   |      |      |      | -10 |      |      |      |      |
| PM10 | BC  | S. America        | -100 | -100 | -100 | 0   | -100 | -100 | -100 | -100 |
| PM10 | OM  | Globe             | -271 | -93  | -27  | 8   | 86   | 211  | 83   | -82  |
|      |     |                   |      |      |      | -10 |      |      |      |      |
| PM10 | OM  | Africa            | -100 | -100 | -100 | 0   | -100 | -100 | NaN  | -100 |
| PM10 | OM  | Asia              | -71  | -98  | -63  | 11  | -24  | 10   | 29   | -61  |
| PM10 | OM  | Europe            | 16   | 6    | 58   | -62 | -18  | -14  | -100 | -69  |

|      |     |                           |      |      |      |     |     |      |      |      |      |
|------|-----|---------------------------|------|------|------|-----|-----|------|------|------|------|
| PM10 | OM  | NorthAmerica              | -100 | -100 | -100 | -10 | 0   | -100 | -100 | -100 | -100 |
| PM10 | Na  | Globe                     | -31  | -101 | -100 | -37 | -20 | -51  | 21   | -56  |      |
| PM10 | Na  | Africa                    | -100 | -325 | 411  | 2   | -1  | -43  | 33   | -75  |      |
| PM10 | Na  | Asia                      | -53  | 80   | 218  | 15  | -24 | -11  | 10   | -68  |      |
| PM10 | Na  | Australia                 | -39  | 230  | 2300 | -79 | -32 | -84  | 29   | -67  |      |
| PM10 | Na  | Europe                    | -7   | 14   | 35   | -9  | -16 | -42  | 16   | -26  |      |
| PM10 | Na  | High Latitudes N. America | -100 | -100 | -100 | -10 | 0   | -100 | -100 | -100 |      |
| PM10 | Na  | SouthAmerica              | -8   | 76   | 185  | 10  | -16 | -42  | 25   | -47  |      |
| PM10 | Na  | Globe                     | -100 | -100 | -100 | -10 | 0   | -100 | -100 | -100 |      |
| PM10 | Al  | Africa                    | -9   | 10   | 29   | -66 | -67 | -11  | -15  | -52  |      |
| PM10 | Al  | Asia                      | 236  | -80  | -47  | -78 | -39 | 37   | -63  | -77  |      |
| PM10 | Al  | Australia                 | -49  | 321  | 1041 | -56 | -63 | 48   | 2    | -68  |      |
| PM10 | Al  | Europe                    | 17   | -946 | 705  | -14 | -22 | 40   | 0    | -50  |      |
| PM10 | Al  | High Latitudes N. America | 34   | 16   | 1    | -9  | -4  | -22  | -4   | -16  |      |
| PM10 | Al  | S. America                | NaN  | -100 | -100 | -10 | 0   | -100 | -100 | -100 |      |
| PM10 | Al  | Globe                     | 37   | 83   | 212  | 24  | 12  | 7    | 33   | -50  |      |
| PM10 | Al  | Africa                    | -450 | 210  | 2500 | -41 | 77  | -83  | 33   | -75  |      |
| PM10 | NO3 | Asia                      | -30  | 23   | 160  | 29  | 23  | 6    | -23  | -60  |      |
| PM10 | NO3 | Australia                 | 4200 | -93  | -88  | -15 | 83  | 53   | -24  | -65  |      |
| PM10 | NO3 | Europe                    | 38   | -20  | 39   | 39  | 36  | -9   | -48  | -65  |      |
| PM10 | NO3 | High Latitudes N. America | -100 | -100 | -100 | -10 | 0   | -100 | -100 | -100 |      |
| PM10 | NO3 | Globe                     | -64  | 38   | 153  | 1   | -4  | -9   | -4   | -34  |      |
| PM10 | NO3 | Asia                      | -100 | -100 | -100 | -10 | 0   | -100 | -100 | -100 |      |
| PM10 | NO3 | Australia                 | -30  | 171  | 655  | -15 | -15 | -39  | -4   | -73  |      |

|      |     |                   |      |      |      |         |      |      |      |      |
|------|-----|-------------------|------|------|------|---------|------|------|------|------|
|      |     |                   |      |      |      | -<br>10 |      |      |      |      |
| PM10 | NO3 | S.<br>America     | -100 | -100 | -100 | 0       | -100 | -100 | -100 | -100 |
| PM10 | NH4 | Globe             | -19  | 60   | 236  | 40      | 39   | -4   | 36   | -60  |
| PM10 | NH4 | Africa            | 57   | 62   | 217  | 50      | 57   | 39   | -6   | -65  |
| PM10 | NH4 | Asia              | -165 | -105 | -31  | 73      | 86   | 14   | 114  | -74  |
|      |     |                   |      |      |      | -<br>10 |      |      |      |      |
| PM10 | NH4 | Australia         | -100 | -100 | -100 | 0       | -100 | -100 | -100 | -100 |
| PM10 | NH4 | Europe            | -14  | -24  | 30   | 16      | 9    | -18  | 24   | -42  |
|      |     |                   |      |      |      | -<br>10 |      |      |      |      |
| PM10 | NH4 | High<br>Latitudes | -100 | -100 | -100 | 0       | -100 | -100 | -100 | -100 |
|      |     |                   |      | 107  |      |         |      |      |      |      |
| PM10 | NH4 | N.<br>America     | 267  | 0    | 1564 | 13      | 16   | -34  | 25   | -50  |
|      |     |                   |      |      |      | -<br>10 |      |      |      |      |
| PM10 | NH4 | S.<br>America     | -100 | -100 | -100 | 0       | -100 | -100 | NaN  | -100 |
